# Supplementary material
Source: PubMed Central journal article supplement (PMC9839717)
Supplement: 41467_2023_35829_MOESM1_ESM.pdf [file 41467_2023_35829_MOESM1_ESM.pdf]

# Supplementary Information

## **Discovery and biosynthesis of karnamicins as angiotensin converting enzyme inhibitors**

Zhiyin Yu, Jian-Ping Huang, Jing Yang, Chongxi Liu, Yijun Yan, Li Wang, Junwei  
Zhao, Yin Chen, Wensheng Xiang, Sheng-Xiong Huang

Correspondence and requests for materials should be addressed to S.-X.H. and W. X.  
(email: sxhuang@mail.kib.ac.cn; xiangwensheng@neau.edu.cn)

### **This PDF file includes:**

- Supplementary Methods
- Supplementary Tables 1-26
- Supplementary Figures 1-150
- Supplementary References

## Supplementary Methods

### General experimental procedures

NMR spectra were recorded using Bruker AVANCE III-600 spectrometer or AV 800 MHz (Bruker Corp., Switzerland), and tetramethylsilane (TMS) was used as internal standard. HRESIMS data were obtained using an Agilent G6230 Q-TOF mass instrument (Agilent Corp., USA). Optical rotation data were determined in MeOH on an Autopol VI S2 & Plus polarimeter (Rudolph Research Analytical, Hackettstown, USA). X-ray crystallographic analysis was carried out with a Bruker APEX DUO single crystal X-ray diffractometer using Mo K $\alpha$  radiation (Bruker Corp., Switzerland). Thin-layer chromatography (TLC) was performed using precoated silica gel GF254 plates (0.25 mm Qingdao Marine Chemical Inc., China), and spots were visualized by UV light (254 nm) and colored by spraying heated silica gel plates with 10% H<sub>2</sub>SO<sub>4</sub> in ethanol. Semipreparative HPLC was conducted on a HITACHI Chromaster system equipped with a DAD detector, an YMC-Hydrosphere C<sub>18</sub> column (250 mm x 10 mm i.d., 5  $\mu$ m) at a flow rate of 3.0 mL/min. HPLC analysis was carried out on HITACHI Chromaster system equipped with a DAD detector, a YMC-Triart C<sub>18</sub> column (250 mm x 4.6 mm i.d., 5  $\mu$ m, Japan) at a flow rate of 1.0 mL/min and a column temperature of 25 °C.

DNA Sequencing and primer synthesis were conducted by TsingKe Biological Technology Co (China). PCR amplifications were carried out on Biometra professional thermocycler using either Taq DNA polymerase (Takara, Japan) or Pfu DNA polymerase (Vazyme, China). Recombinant proteins were purified on a GE AKTA pure system with a 5 mL Histrap HP column (Cytiva, USA).

Three <sup>13</sup>C-labeled compounds, [1-<sup>13</sup>C] sodium acetate, [2-<sup>13</sup>C] sodium acetate, and [1, 2-<sup>13</sup>C<sub>2</sub>] sodium acetate, were purchased from Cambridge Isotope Laboratories, Inc. (USA). Angiotensin converting enzyme (SLBQ5896V), Captopril (BCBS0901), HEPES (4-hydroxyethylpiperazine ethanesulfonic acid, SLBV6923) and FAPGG (Furan acryloyl tripeptide, SLBS2881V), were purchased from Sigma-Aldrich Co. (USA). ACE inhibitory activities were recorded using a Multifunctional microplate reader (FlexStation3, USA).

### Protein expression and purification

The genes encoding *knmB1*, *knmB2* and *knmF* were amplified by PCR from genomic DNA of *L. rhizosphaerae* NEAU-A2 with primers listed in Supplementary Table 22. The gene *knmF* was cloned into the pET-28a vector using the *NdeI* and *SaII* restriction sites. The genes *knmB1* and *knmB2* were cloned into the pET-32a vector using the *HindIII* and *BamHI* restriction sites. Single amino acid mutants of KnmB1 and KnmB2 were amplified by PCR from constructed pET32a plasmid with primers listed in Supplementary Table 23.

The resulting constructs of *knmF* and *knmB1* (or *knmB1* mutants) were used to transform into *Escherichia coli* BL21(DE3) cells, and cultivated in 500 mL LB media containing kanamycin (50  $\mu$ g/mL) or ampicillin (100  $\mu$ g/mL) at 37 °C until the OD<sub>600</sub> reached 0.6. The cultures were cooled to 16 °C and induced with 0.3 mM isopropyl- $\beta$ -D-thiogalactopyranoside (IPTG) for 18 h at 16 °C. The resulting construct of *knmB2* or

*knmB2* mutant was used to transform into *E. coli* BL21(DE3) which harboring pGro7 (Takara) for expression, and cultivated in 500 mL LB media containing chloramphenicol (25 µg/mL) and ampicillin (100 µg/mL) at 37 °C until the OD<sub>600</sub> reached 0.6. The cultures were cooled to 16 °C and induced with 0.3 mM IPTG and 2 mM L-arabinose for 18 h at 16 °C.

The cells were centrifuged for 20 min at 3,488 x g at 4 °C and the pellet was resuspended in 50 mL of lysis buffer A (50 mM Tris, 300 mM NaCl, 15 mM imidazole, 10% glycerol, pH 8.0) and lysed on ice by sonication. The cell lysates were centrifuged at 68,905 x g for 40 min and the supernatant was filtered (0.22 µm filter) and purified using the AKTA pure system with a 5 mL Histrap™ FF column (GE Healthcare). The target proteins were eluted at a flow rate of 2 mL/min over 15 min with a linear gradient from 15 to 500 mM imidazole in buffer A and buffer B (0–5 min, 100% buffer A; 5–10 min, 50% buffer A, 50% buffer B; 10–12 min, 100% buffer B; 12–15 min, 100% buffer A. buffer B: 500 mM imidazole, 50 mM Tris, 300 mM NaCl, 10% glycerol, pH = 8.0). The target proteins were concentrated by ultrafiltration using Amicon Ultra-4 (10 K, Millipore) and stored at –80 °C in storage buffer (100 mM NaH<sub>2</sub>PO<sub>4</sub>, 10% glycerol, pH 7.2). Protein concentrations were determined by 280 nm absorbance (Nanodrop 2000c, Fisher Scientific). SDS-PAGE analysis of proteins was shown in Supplementary Fig. 117.

### Chemical synthesis of compounds 29 and 31

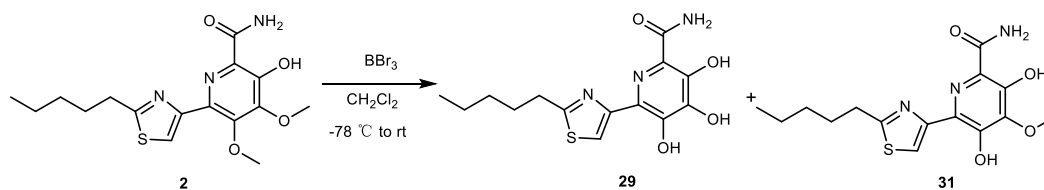

To a solution of **2** (20 mg) in DCM (2 mL) was added BBr<sub>3</sub> (500 µL) at –78 °C under N<sub>2</sub> atmosphere<sup>1</sup>. The reaction was stirred at –78 °C for 30 minutes and was then warmed up to rt. The reaction was then stirred at rt for 2 h. The reaction mixture was slowly added into 4 mL saturated NaHCO<sub>3</sub> solution at 0 °C. The aqueous layer was extracted by ethyl acetate for three times and the combined organic layers were purified using reverse-phase HPLC to afford **31** (1.6 mg) and **29** (7.6 mg). Compound **29**: HRESIMS, <sup>1</sup>H, <sup>13</sup>C, COSY, HSQC and HMBC NMR data, see Supplementary Table 24 and Supplementary Figs 133-138. Compound **31**: HRESIMS, <sup>1</sup>H, <sup>13</sup>C, COSY, HSQC and HMBC NMR data, see Supplementary Table 25 and Supplementary Figs 139-144. The spectral data of **29** and **31** are also reported in the section “Spectral data for new compounds”.

### In vitro preparation 30 and 34

To isolate the product **30** for structure determination, in vitro enzymatic reactions were performed as described above. Dozens of 100 µL reaction mixtures containing 50 mM Tris-HCl buffer (pH 7.5), 1 mM **28**, 2 mM SAM and 2 µM KnmF, were incubated at 30 °C for 15 min. The reaction was quenched and further isolated by HPLC directly to afford **30** (1 mg) using an isocratic elution of 60% acetonitrile (v/v) containing 0.1%

acetic acid (v/v) with a flow rate of 1 mL/min. Compound **30**: HRESIMS, <sup>1</sup>H NMR and <sup>13</sup>C NMR data see Supplementary Table 20 and Supplementary Figs 118-123. The spectral data of **30** are also reported in the section "Spectral data for new compounds".

To isolate the product **34** for structure determination, in vitro enzymatic reactions were performed as described above. Dozens of 200 μL enzymatic reactions containing 50 mM Tris-HCl buffer (pH 7.5), 1 mM **25**, 2 mM SAM and 20 μM KnmF, were incubated at 30 °C for 30 h. The reaction was quenched and further isolated by HPLC directly to afford **34** (0.8 mg) using an isocratic elution of 55% acetonitrile (v/v) with a flow rate of 1 mL/min. Compound **34**: HRESIMS, <sup>1</sup>H NMR and <sup>13</sup>C NMR data see Supplementary Table 26 and Supplementary Figs 145-150. The spectral data of **34** are also reported in the section "Spectral data for new compounds".

### FAD detection

KnmB2 (83 μM) or variants (83 μM) was dissolved in storage buffer to give a final volume of 200 μL, and KnmB1 (86 μM) and variants (86 μM) were treated in the same way to obtain a final volume of 200 μL. FAD content was determined by boiling protein samples for 10 min in the dark, followed by centrifugation at 13,523 x g for 10 min to remove coagulated protein. The absorbance of the released FAD was measured at 450 nm by NanoDrop 2000c (Fisher Scientific)<sup>2-3</sup>. The level of FAD was calculated according to a standard concentration curve from FAD standard.

### Hydrogen peroxide formation assay and NADPH oxidation

The hydrogen peroxide formed from KnmB1, KnmB2 and their variants were measured using the Hydrogen Peroxide Assay Kit (Beyotime Industrial Co. Ltd, Shanghai, China)<sup>4-5</sup>. 5–100 μL of enzyme reaction mixture was added to 100 μL of working reagent (S0038-1). The mixture was incubated for 30 min at 25 °C, at which time the absorbance at 560 nm was measured by NanoDrop 2000c (Fisher Scientific). The level of H<sub>2</sub>O<sub>2</sub> was calculated according to a standard concentration curve from standard solution.

NADPH detection was carried out in the cuvette by NanoDrop 2000c (Fisher Scientific). NADPH signal at 340 nm was monitored in time using 6220 M<sup>-1</sup> cm<sup>-1</sup> as extinction coefficient<sup>6</sup>.

### Spectral data for new compounds

Karnamicin E<sub>1</sub> (**1**): white amorphous solid;  $[\alpha]_D^{25.0}$  -35.62 (c 0.1, MeOH); <sup>1</sup>H NMR (600 MHz, CDCl<sub>3</sub>) δ 12.51 (s, 1H), 8.67 (s, 1H), 7.82 (s, 1H), 5.68 (s, 1H), 4.11 (s, 3H), 3.95 (s, 3H), 3.08 (t, *J* = 7.9 Hz, 2H), 1.81 (m, 2H), 1.54 (m, 1H), 1.43 (m, 2H), 1.23 (m, 2H), 0.87 (d, *J* = 6.6 Hz, 6H); <sup>13</sup>C NMR (150 MHz, CDCl<sub>3</sub>) δ 172.0, 171.3, 152.8, 150.7, 150.4, 148.0, 137.9, 127.3, 118.6, 61.1, 61.0, 38.7, 33.6, 30.6, 28.0, 27.1, 22.7. UV (MeOH) λ<sub>max</sub> (log ε): 220 (4.40), 243 (4.36), 316 (3.84) nm; HRMS (*m/z*): [M+H]<sup>+</sup> calcd. for C<sub>18</sub>H<sub>26</sub>N<sub>3</sub>O<sub>4</sub>S, 380.1639; found, 380.1648; analysis (calcd., found for C<sub>18</sub>H<sub>26</sub>N<sub>3</sub>O<sub>4</sub>S): C (56.97), H (6.64), N (11.07), O (16.86), S (8.45).

Karnamicin E<sub>2</sub> (**2**): white amorphous solid;  $[\alpha]_D^{25.0}$  -34.28 (c 0.1, MeOH); <sup>1</sup>H NMR (600 MHz, CDCl<sub>3</sub>) δ 12.48 (s, 1H), 8.59 (s, 1H), 7.81 (s, 1H), 5.73 (s, 1H), 4.11 (s, 3H), 3.95 (s, 3H), 3.06 (t, *J* = 7.9 Hz, 2H), 1.82 (m, 2H), 1.42 (m, 2H), 1.38 (m, 2H), 0.90 (t, *J* = 7.1 Hz, 3H); <sup>13</sup>C NMR (150 MHz, CDCl<sub>3</sub>) δ 172.0, 171.3, 152.8, 150.7, 150.4, 148.0,

137.9, 127.3, 118.6, 61.1, 61.0, 33.5, 31.5, 30.0, 22.5, 14.1; UV (MeOH)  $\lambda_{\max}$  (log  $\epsilon$ ): 224 (4.60), 243 (4.61), 317 (4.13) nm; HRMS ( $m/z$ ):  $[M+Na]^+$  calcd. for  $C_{16}H_{21}N_3O_4SNa$ , 374.1145; found, 374.1148; analysis (calcd., found for  $C_{16}H_{21}N_3O_4S$ ): C (54.69), H (6.02), N (11.96); O (18.21), S (9.12).

Karnamicin E<sub>3</sub> (**3**): white amorphous solid;  $[\alpha]_D^{25.0}$  -30.62 (c 0.1, MeOH); <sup>1</sup>H NMR (600 MHz, CDCl<sub>3</sub>)  $\delta$  12.43 (s, 1H), 8.41 (s, 1H), 7.79 (s, 1H), 5.64 (s, 1H), 4.12 (s, 3H), 3.94 (s, 3H), 3.09 (m, 2H), 1.87 (m, 1H), 1.65 (m, 1H), 1.49 (m, 1H), 1.42 (m, 1H), 1.23 (m, 1H), 0.95 (d,  $J$  = 6.6 Hz, 3H), 0.90 (t,  $J$  = 7.3 Hz, 3H); <sup>13</sup>C NMR (150 MHz, CDCl<sub>3</sub>)  $\delta$  171.9, 171.5, 152.8, 150.8, 150.4, 148.1, 138.1, 127.2, 118.6, 61.2, 61.0, 37.1, 34.3, 31.4, 29.4, 19.1, 11.5; UV (MeOH)  $\lambda_{\max}$  (log  $\epsilon$ ): 220 (4.42), 243 (4.36), 311 (3.90) nm; HRMS ( $m/z$ ):  $[M+H]^+$  calcd. for  $C_{17}H_{24}N_3O_4S$ , 366.1482; found, 366.1492; analysis (calcd., found for  $C_{17}H_{23}N_3O_4S$ ): C (55.87), H (6.34), N (11.50), O (17.51), S (8.77).

Karnamicin E<sub>4</sub> (**4**): white amorphous solid;  $[\alpha]_D^{25.0}$  -32.64 (c 0.1, MeOH); <sup>1</sup>H NMR (600 MHz, CDCl<sub>3</sub>)  $\delta$  8.49 (s, 1H), 7.82 (s, 1H), 5.85 (s, 1H), 4.12 (s, 3H), 3.96 (s, 3H), 3.07 (t,  $J$  = 7.9 Hz, 2H), 1.83 (m, 2H), 1.60 (m, 1H), 1.33 (m, 2H), 0.90 (d,  $J$  = 6.6 Hz, 6H); <sup>13</sup>C NMR (150 MHz, CDCl<sub>3</sub>)  $\delta$  172.0, 171.5, 152.8, 150.8, 150.3, 148.0, 137.9, 127.2, 118.6, 61.2, 61.0, 38.5, 33.7, 28.2, 27.9, 22.7; UV (MeOH)  $\lambda_{\max}$  (log  $\epsilon$ ): 220 (4.45), 244 (4.41), 314 (3.91) nm; HRMS ( $m/z$ ):  $[M+H]^+$  calcd. for  $C_{17}H_{24}N_3O_4S$ , 366.1482; found, 366.1489; analysis (calcd., found for  $C_{17}H_{23}N_3O_4S$ ): C (55.87), H (6.34), N (11.50), O (17.51), S (8.77).

Karnamicin E<sub>5</sub> (**5**): white amorphous solid;  $[\alpha]_D^{25.0}$  -33.28 (c 0.1, MeOH); <sup>1</sup>H NMR (600 MHz, CDCl<sub>3</sub>)  $\delta$  12.44 (s, 1H), 8.48 (s, 1H), 7.80 (s, 1H), 5.68 (s, 1H), 4.12 (s, 3H), 3.95 (s, 3H), 3.09 (t,  $J$  = 7.5 Hz, 2H), 1.73 (m, 2H), 1.70 (m, 1H), 0.97 (d,  $J$  = 6.3 Hz, 6H); <sup>13</sup>C NMR (150 MHz, CDCl<sub>3</sub>)  $\delta$  172.0, 171.4, 152.8, 150.8, 150.4, 148.0, 138.0, 127.2, 118.6, 61.2, 61.0, 39.3, 31.6, 28.0, 22.5; UV (MeOH)  $\lambda_{\max}$  (log  $\epsilon$ ): 220 (4.40), 244 (4.37), 317 (3.85) nm; HRMS ( $m/z$ ):  $[M+H]^+$  calcd. for  $C_{16}H_{22}N_3O_4S$ , 352.1326; found, 352.1335; analysis (calcd., found for  $C_{16}H_{21}N_3O_4S$ ): C (54.69), H (6.02), N (11.96), O (18.21), S (9.12).

Karnamicin E<sub>6</sub> (**6**): white amorphous solid;  $[\alpha]_D^{25.0}$  -34.12 (c 0.1, MeOH); <sup>1</sup>H NMR (600 MHz, CDCl<sub>3</sub>)  $\delta$  12.48 (s, 1H), 8.59 (s, 1H), 7.81 (s, 1H), 5.65 (s, 1H), 4.11 (s, 3H), 3.95 (s, 3H), 3.07 (t,  $J$  = 7.7 Hz, 2H), 1.82 (m, 2H), 1.42 (m, 2H), 1.32 (m, 4H), 0.89 (t,  $J$  = 6.8 Hz, 3H); <sup>13</sup>C NMR (150 MHz, CDCl<sub>3</sub>)  $\delta$  172.0, 171.2, 152.8, 150.8, 150.4, 148.0, 138.0, 127.3, 118.6, 61.2, 61.0, 33.6, 31.6, 30.3, 29.0, 22.7, 14.2; UV (MeOH)  $\lambda_{\max}$  (log  $\epsilon$ ): 220 (4.42), 243 (4.39), 317 (3.86) nm; HRMS ( $m/z$ ):  $[M+H]^+$  calcd. for  $C_{17}H_{24}N_3O_4S$ , 366.1482; found, 366.1493; analysis (calcd., found for  $C_{17}H_{23}N_3O_4S$ ): C (55.87), H (6.34), N (11.50), O (17.51), S (8.77).

Compound **20**: white amorphous solid; <sup>1</sup>H NMR (600 MHz, MeOD)  $\delta$  8.22 (s, 1H), 7.58 (d,  $J$  = 1.5 Hz, 1H), 7.45 (d,  $J$  = 1.5 Hz, 1H), 4.69 (dd,  $J$  = 9.7, 4.4 Hz, 1H), 3.10 (t,  $J$  = 7.6 Hz, 2H), 1.88 (m, 1H), 1.83 (m, 2H), 1.77 (m, 2H), 1.57 (m, 1H), 1.46 (m, 2H), 1.26 (m, 2H), 1.00 (d,  $J$  = 6.1 Hz, 3H), 0.99 (d,  $J$  = 6.1 Hz, 3H), 0.90 (d,  $J$  = 6.6 Hz, 6H); <sup>13</sup>C NMR (150 MHz, MeOD)  $\delta$  176.4, 173.9, 168.0, 166.5, 154.9, 154.2, 152.0, 118.9, 111.7, 110.2, 52.7, 42.0, 39.8, 34.2, 31.5, 29.1, 27.9, 26.3, 23.5, 23.0, 22.1; HRMS ( $m/z$ ):  $[M+H]^+$  calcd. for  $C_{22}H_{32}N_3O_4S$ , 434.2108; found, 434.2117; analysis (calcd., found for  $C_{22}H_{31}N_3O_4S$ ): C (61.72), H (7.43), N (9.39), O (14.30), S (7.16).

Compound **21**: white amorphous solid;  $^1\text{H}$  NMR (600 MHz, MeOD)  $\delta$  8.21 (s, 1H), 7.57 (d,  $J = 2.2$  Hz, 1H), 7.44 (d,  $J = 2.2$  Hz, 1H), 4.70 (dd,  $J = 9.8, 4.5$  Hz, 1H), 3.11 (t,  $J = 7.6$  Hz, 2H), 1.88 (m, 1H), 1.85 (m, 2H), 1.80 (m, 1H), 1.77 (m, 1H), 1.53 (m, 4H), 1.18 (s, 6H), 1.00 (d,  $J = 6.5$  Hz, 3H), 0.99 (d,  $J = 6.5$  Hz, 3H);  $^{13}\text{C}$  NMR (150 MHz, MeOD)  $\delta$  176.1, 173.8, 168.2, 166.5, 154.9, 154.1, 152.1, 118.9, 111.7, 110.2, 71.3, 52.5, 44.3, 41.9, 34.2, 31.9, 29.2, 26.3, 24.9, 23.4, 22.1; HRMS ( $m/z$ ):  $[\text{M}+\text{Na}]^+$  calcd. for  $\text{C}_{22}\text{H}_{31}\text{N}_3\text{O}_5\text{SNa}$ , 472.1877; found, 472.1881; analysis (calcd., found for  $\text{C}_{22}\text{H}_{31}\text{N}_3\text{O}_5\text{S}$ ): C (58.78), H (6.95), N (9.35), O (17.79), S (7.13).

Compound **22**: white amorphous solid;  $^1\text{H}$  NMR (600 MHz, MeOD)  $\delta$  8.22 (s, 1H), 7.58 (d,  $J = 2.2$  Hz, 1H), 7.44 (d,  $J = 2.2$  Hz, 1H), 4.69 (dd,  $J = 9.8, 4.5$  Hz, 1H), 3.09 (t,  $J = 7.7$  Hz, 2H), 1.89 (m, 1H), 1.86 (m, 2H), 1.82 (m, 1H), 1.77 (m, 1H), 1.45 (m, 2H), 1.41 (m, 2H), 1.00 (d,  $J = 6.2$  Hz, 3H), 0.99 (d,  $J = 6.2$  Hz, 3H), 0.94 (t,  $J = 7.1$  Hz, 3H);  $^{13}\text{C}$  NMR (150 MHz, MeOD)  $\delta$  176.3, 174.0, 168.1, 166.5, 154.9, 154.1, 152.1, 118.9, 111.7, 110.2, 52.6, 42.0, 34.2, 32.4, 31.0, 26.3, 23.4, 23.4, 22.1, 14.3; HRMS ( $m/z$ ):  $[\text{M}+\text{Na}]^+$  calcd. for  $\text{C}_{20}\text{H}_{27}\text{N}_3\text{O}_4\text{SNa}$ , 428.1614; found, 428.1612; analysis (calcd., found for  $\text{C}_{20}\text{H}_{27}\text{N}_3\text{O}_4\text{S}$ ): C (59.24), H (6.71), N (10.36), O (15.78), S (7.91).

Compound **24**: white amorphous solid;  $^1\text{H}$  NMR (600 MHz, DMSO- $d_6$ )  $\delta$  8.57 (s, 1H), 8.35 (s, 1H), 7.60 (s, 1H), 7.54 (d,  $J = 2.2$  Hz, 1H), 7.31 (d,  $J = 2.2$  Hz, 1H), 3.03 (t,  $J = 7.6$  Hz, 2H), 1.74 (m, 2H), 1.52 (m, 1H), 1.37 (m, 2H), 1.21 (m, 2H), 0.85 (d,  $J = 6.6$  Hz, 6H);  $^{13}\text{C}$  NMR (150 MHz, DMSO- $d_6$ )  $\delta$  170.9, 167.0, 166.1, 153.8, 152.4, 151.8, 118.1, 110.0, 108.6, 38.1, 32.7, 29.6, 27.3, 26.2, 22.5; HRMS ( $m/z$ ):  $[\text{M}+\text{Na}]^+$  calcd. for  $\text{C}_{16}\text{H}_{21}\text{N}_3\text{O}_2\text{SNa}$ , 342.1247; found, 342.1251; analysis (calcd., found for  $\text{C}_{16}\text{H}_{21}\text{N}_3\text{O}_2\text{S}$ ): C (60.16), H (6.63), N (13.16), O (10.02), S (10.04).

Compound **25**: white amorphous solid;  $^1\text{H}$  NMR (600 MHz, DMSO- $d_6$ )  $\delta$  8.58 (s, 1H), 8.35 (s, 1H), 7.61 (s, 1H), 7.55 (d,  $J = 2.2$  Hz, 1H), 7.31 (d,  $J = 2.2$  Hz, 1H), 3.03 (t,  $J = 7.6$  Hz, 2H), 1.77 (m, 2H), 1.37 (m, 2H), 1.34 (m, 2H), 0.88 (t,  $J = 7.0$  Hz, 3H);  $^{13}\text{C}$  NMR (150 MHz, DMSO- $d_6$ )  $\delta$  170.9, 166.8, 166.1, 153.7, 152.4, 151.8, 118.1, 110.0, 108.6, 32.7, 30.6, 29.1, 21.8, 13.9; HRMS ( $m/z$ ):  $[\text{M}+\text{Na}]^+$  calcd. for  $\text{C}_{14}\text{H}_{17}\text{N}_3\text{O}_2\text{SNa}$ , 314.0934; found, 314.0936; analysis (calcd., found for  $\text{C}_{14}\text{H}_{17}\text{N}_3\text{O}_2\text{S}$ ): C (57.71), H (5.88), N (14.42), O (10.98), S (11.00).

Compound **26**: white amorphous solid;  $^1\text{H}$  NMR (600 MHz, MeOD)  $\delta$  8.23 (s, 1H), 7.57 (d,  $J = 2.0$  Hz, 1H), 7.45 (d,  $J = 2.0$  Hz, 1H), 3.07 (t,  $J = 7.6$  Hz, 2H), 1.85 (m, 2H), 1.62 (m, 1H), 1.34 (m, 2H), 0.93 (d,  $J = 6.6$  Hz, 6H);  $^{13}\text{C}$  NMR (150 MHz, MeOD)  $\delta$  173.9, 169.4, 168.4, 155.0, 154.0, 152.2, 118.9, 111.6, 110.3, 39.4, 34.4, 29.2, 29.0, 22.9; HRMS ( $m/z$ ):  $[\text{M}+\text{Na}]^+$  (calcd. for  $\text{C}_{15}\text{H}_{19}\text{N}_3\text{O}_2\text{SNa}$ , 328.1090; found, 328.1098; analysis (calcd., found for  $\text{C}_{15}\text{H}_{19}\text{N}_3\text{O}_2\text{S}$ ): C (58.99), H (6.27), N (13.76), O (10.48), S (10.50).

Compound **28**: white amorphous solid;  $^1\text{H}$  NMR (600 MHz, acetone- $d_6$ )  $\delta$  12.63 (s, 1H), 12.12 (s, 1H), 8.36 (s, 1H), 7.19 (s, 1H), 3.18 (t,  $J = 7.6$  Hz, 2H), 1.86 (m, 2H), 1.57 (m, 1H), 1.47 (m, 2H), 1.28 (m, 2H), 0.88 (d,  $J = 6.6$  Hz, 6H);  $^{13}\text{C}$  NMR (150 MHz, acetone- $d_6$ )  $\delta$  172.9, 172.9, 154.2, 149.2, 148.9, 141.2, 129.6, 124.9, 115.7, 39.3, 33.4, 30.7, 28.6, 27.5, 22.9; HRMS ( $m/z$ ):  $[\text{M}+\text{H}]^+$  calcd. for  $\text{C}_{16}\text{H}_{22}\text{N}_3\text{O}_4\text{S}$ , 352.1326; found, 352.1329; analysis (calcd., found for  $\text{C}_{16}\text{H}_{21}\text{N}_3\text{O}_4\text{S}$ ): C (54.69), H (6.02), N (11.96), O (18.21), S (9.12).

Compound **29**: white amorphous solid;  $^1\text{H}$  NMR (600 MHz,  $\text{DMSO-}d_6$ )  $\delta$  12.79 (s, 1H), 12.02 (s, 1H), 8.58 (s, 2H), 8.06 (s, 1H), 3.11 (t,  $J = 7.5$  Hz, 2H), 1.78 (m, 2H), 1.35 (m, 4H), 0.87 (t,  $J = 6.9$  Hz, 3H).  $^{13}\text{C}$  NMR (150 MHz,  $\text{DMSO-}d_6$ )  $\delta$  171.9, 171.6, 152.6, 148.0, 144.5, 140.1, 128.3, 123.8, 115.8, 32.0, 30.5, 28.7, 21.8, 13.8; HRMS ( $m/z$ ):  $[\text{M}+\text{H}]^+$  calcd. for  $\text{C}_{14}\text{H}_{18}\text{N}_3\text{O}_4\text{S}$ , 324.1013; found, 324.1019; analysis (calcd., found for  $\text{C}_{14}\text{H}_{17}\text{N}_3\text{O}_4\text{S}$ ): C (52.00), H (5.30), N (12.99), O (19.79), S (9.91).

Compound **30**: white amorphous solid;  $^1\text{H}$  NMR (800 MHz,  $\text{CDCl}_3$ )  $\delta$  12.55 (s, 1H), 12.12 (s, 1H), 7.78 (s, 1H), 7.63 (s, 1H), 5.56 (s, 1H), 4.12 (s, 3H), 3.08 (t,  $J = 7.7$  Hz, 2H), 1.84 (m, 1H), 1.55 (m, 1H), 1.42 (m, 2H), 1.26 – 1.22 (m, 3H), 0.88 (d,  $J = 6.6$  Hz, 6H);  $^{13}\text{C}$  NMR (200 MHz,  $\text{CDCl}_3$ )  $\delta$  171.9, 171.7, 153.0, 152.9, 150.5, 142.3, 130.0, 124.0, 113.9, 60.8, 38.7, 33.2, 29.9, 28.0, 26.9, 22.7; HRMS ( $m/z$ ):  $[\text{M}+\text{H}]^+$  calcd. for  $\text{C}_{17}\text{H}_{24}\text{N}_3\text{O}_4\text{S}$ , 366.1482; found, 366.1477; analysis (calcd., found for  $\text{C}_{17}\text{H}_{23}\text{N}_3\text{O}_4\text{S}$ ): C (55.87), H (6.34), N (11.50), O (17.51), S (8.77).

Compound **31**: white amorphous solid;  $^1\text{H}$  NMR (600 MHz,  $\text{DMSO-}d_6$ )  $\delta$  13.07 (s, 1H), 12.33 (s, 1H), 8.64 (s, 2H), 8.12 (s, 1H), 3.91 (s, 3H), 3.12 (t,  $J = 7.5$  Hz, 2H), 1.78 (m, 2H), 1.35 (m, 4H), 0.88 (t,  $J = 7.0$  Hz, 3H);  $^{13}\text{C}$  NMR (150 MHz,  $\text{DMSO-}d_6$ )  $\delta$  171.8, 171.7, 152.2, 152.1, 149.3, 141.4, 129.2, 124.1, 116.2, 59.8, 32.0, 30.5, 28.8, 21.8, 13.9; HRMS ( $m/z$ ):  $[\text{M}+\text{H}]^+$  calcd. for  $\text{C}_{15}\text{H}_{20}\text{N}_3\text{O}_4\text{S}$ , 338.1169; found, 338.1175; analysis (calcd., found for  $\text{C}_{15}\text{H}_{19}\text{N}_3\text{O}_4\text{S}$ ): C (53.40), H (5.68), N (12.45), O (18.97), S (9.50).

Compound **32**: white amorphous solid;  $^1\text{H}$  NMR (600 MHz,  $\text{DMSO-}d_6$ )  $\delta$  8.69 (s, 1H), 8.45 (s, 1H), 7.73 (s, 1H), 7.65 (d,  $J = 2.4$  Hz, 1H), 7.48 (d,  $J = 2.4$  Hz, 1H), 3.95 (s, 3H), 3.05 (t,  $J = 7.6$  Hz, 2H), 1.75 (m, 2H), 1.53 (m, 1H), 1.39 (m, 2H), 1.22 (m, 2H), 0.85 (d,  $J = 6.6$  Hz, 6H);  $^{13}\text{C}$  NMR (150 MHz,  $\text{DMSO-}d_6$ )  $\delta$  171.3, 167.5, 165.7, 153.2, 152.6, 152.1, 119.0, 108.1, 106.6, 55.8, 38.0, 32.7, 29.7, 27.3, 26.2, 22.5. HRMS ( $m/z$ ):  $[\text{M}+\text{H}]^+$  calcd. for  $\text{C}_{17}\text{H}_{24}\text{N}_3\text{O}_2\text{S}$ , 334.1584; found, 334.1586; analysis (calcd., found for  $\text{C}_{17}\text{H}_{23}\text{N}_3\text{O}_2\text{S}$ ): C (61.23), H (6.95), N (12.60), O (9.60), S (9.61).

Compound **33**: white amorphous solid;  $^1\text{H}$  NMR (600 MHz,  $\text{DMSO-}d_6$ )  $\delta$  8.69 (s, 1H), 8.45 (s, 1H), 7.73 (s, 1H), 7.65 (d,  $J = 2.3$  Hz, 1H), 7.48 (d,  $J = 2.3$  Hz, 1H), 3.04 (t,  $J = 7.6$  Hz, 2H), 1.77 (m, 2H), 1.59 (m, 1H), 1.28 (m, 2H), 0.88 (d,  $J = 6.6$  Hz, 6H);  $^{13}\text{C}$  NMR (150 MHz,  $\text{DMSO-}d_6$ )  $\delta$  171.3, 167.5, 165.7, 153.2, 152.6, 152.1, 119.0, 108.1, 106.5, 55.8, 37.7, 32.9, 27.3, 27.2, 22.5; HRMS ( $m/z$ ):  $[\text{M}+\text{H}]^+$  calcd. for  $\text{C}_{16}\text{H}_{22}\text{N}_3\text{O}_2\text{S}$ , 320.1427; found, 320.1426; analysis (calcd., found for  $\text{C}_{16}\text{H}_{21}\text{N}_3\text{O}_2\text{S}$ ): C (60.16), H (6.63), N (13.16), O (10.02), S (10.04).

Compound **34**: white amorphous solid;  $^1\text{H}$  NMR (800 MHz,  $\text{DMSO-}d_6$ )  $\delta$  8.68 (s, 1H), 8.45 (s, 1H), 7.73 (s, 1H), 7.65 (d,  $J = 2.4$  Hz, 1H), 7.48 (d,  $J = 2.4$  Hz, 1H), 3.95 (s, 3H), 3.05 (t,  $J = 7.7$  Hz, 2H), 1.77 (m, 2H), 1.36 (m, 4H), 0.88 (t,  $J = 7.1$  Hz, 3H);  $^{13}\text{C}$  NMR (200 MHz,  $\text{DMSO-}d_6$ )  $\delta$  171.3, 167.5, 165.7, 153.2, 152.6, 152.1, 119.0, 108.1, 106.6, 55.8, 32.7, 30.7, 29.2, 21.8, 13.9. HRMS ( $m/z$ ):  $[\text{M}+\text{H}]^+$  calcd. for  $\text{C}_{15}\text{H}_{20}\text{N}_3\text{O}_2\text{S}$ , 306.1271; found, 306.1275; analysis (calcd., found for  $\text{C}_{15}\text{H}_{19}\text{N}_3\text{O}_2\text{S}$ ): C (58.99), H (6.27), N (13.76), O (10.48), S (10.50).

Compound **35**: white amorphous solid;  $^1\text{H}$  NMR (600 MHz,  $\text{CDCl}_3$ )  $\delta$  12.17 (s, 1H), 7.96 (s, 1H), 7.79 (s, 1H), 7.75 (s, 1H), 5.71 (s, 1H), 4.05 (s, 3H), 3.05 (t,  $J = 7.8$  Hz, 2H), 1.85 (m, 2H), 1.44 (m, 2H), 1.40 (m, 2H), 0.93 (t,  $J = 7.1$  Hz, 3H);  $^{13}\text{C}$  NMR (150

MHz, CDCl<sub>3</sub>)  $\delta$  172.0, 172.0, 156.2, 154.0, 148.8, 144.5, 129.5, 115.0, 108.1, 56.5, 33.7, 31.5, 29.9, 22.5, 14.1; HRMS (*m/z*): [M+Na]<sup>+</sup> calcd for C<sub>15</sub>H<sub>19</sub>N<sub>3</sub>O<sub>3</sub>SNa, 344.1039; found, 344.1036; analysis (calcd., found for C<sub>15</sub>H<sub>19</sub>N<sub>3</sub>O<sub>3</sub>S): C (56.06), H (5.96), N (13.07), O (14.93), S (9.98).

Compound **36**: white amorphous solid; <sup>1</sup>H NMR (600 MHz, CDCl<sub>3</sub>)  $\delta$  12.19 (s, 1H), 7.97 (s, 1H), 7.77 (s, 2H), 5.96 (s, 1H), 4.04 (s, 3H), 3.07 (t, *J* = 7.5 Hz, 2H), 2.58 (t, *J* = 7.2 Hz, 2H), 2.16 (s, 3H), 2.12 (m, 2H); <sup>13</sup>C NMR (150 MHz, CDCl<sub>3</sub>)  $\delta$  208.2, 172.1, 170.6, 156.1, 154.2, 148.8, 144.4, 129.6, 115.3, 108.1, 56.5, 42.5, 32.7, 30.2, 23.9; HRMS (*m/z*): [M+Na]<sup>+</sup> calcd. for C<sub>15</sub>H<sub>17</sub>N<sub>3</sub>O<sub>4</sub>SNa<sup>+</sup>, 358.0832; found, 358.0836; analysis (calcd., found for C<sub>15</sub>H<sub>17</sub>N<sub>3</sub>O<sub>4</sub>S): C (53.72), H (5.11), N (12.53), O (19.08), S (9.56).

Compound **37**: white amorphous solid; <sup>1</sup>H NMR (600 MHz, CDCl<sub>3</sub>)  $\delta$  12.31 (s, 1H), 8.33 (s, 1H), 7.70 (s, 1H), 7.67 (s, 1H), 5.74 (s, 1H), 4.04 (s, 3H), 3.90 (m, 1H), 3.11 (m, 2H), 2.00 (m, 2H), 1.62 (m, 2H), 1.22 (d, *J* = 6.2 Hz, 3H); <sup>13</sup>C NMR (150 MHz, CDCl<sub>3</sub>)  $\delta$  172.2, 171.8, 156.2, 154.0, 148.9, 144.1, 129.7, 115.1, 107.7, 67.3, 56.5, 38.7, 33.2, 25.3, 23.8; HRESIMS (*m/z*): [M+Na]<sup>+</sup> calcd. for C<sub>15</sub>H<sub>19</sub>N<sub>3</sub>O<sub>4</sub>SNa, 360.0988; found, 360.0992; analysis (calcd., found for C<sub>15</sub>H<sub>19</sub>N<sub>3</sub>O<sub>4</sub>S): C (53.40), H (5.68), N (12.45), O (18.97), S (9.50).

## Supplementary Tables

**Supplementary Table 1.** NMR data of compound **1** (CDCl<sub>3</sub>,  $\delta$  in ppm).

| No   | $\delta_c$             | $\delta_H$ mult ( <i>J</i> in Hz) | <sup>1</sup> H- <sup>1</sup> H COSY | HMBC               |
|------|------------------------|-----------------------------------|-------------------------------------|--------------------|
| 2    | 127.27, C              |                                   |                                     |                    |
| 3    | 172.02, C              |                                   |                                     |                    |
| 4    | 152.84, C              |                                   |                                     |                    |
| 5    | 148.01, C              |                                   |                                     |                    |
| 6    | 150.73, C              |                                   |                                     |                    |
| 7    | 137.87, C              |                                   |                                     |                    |
| 8    | 150.38, C              |                                   |                                     |                    |
| 9    | 118.60, CH             | 7.82, s                           |                                     | C-7, 8, 11         |
| 11   | 171.28, C              |                                   |                                     |                    |
| 13   | 60.97, CH <sub>3</sub> | 4.11, s                           |                                     | C-5                |
| 14   | 61.12, CH <sub>3</sub> | 3.95, s                           |                                     | C-6                |
| 1'   | 33.61, CH <sub>2</sub> | 3.08, t (7.9)                     | H-2',                               | C-3', 2', 11, 8, 9 |
| 2'   | 30.60, CH <sub>2</sub> | 1.81, m                           | H-3', H-2'                          | C-3', 1', 4', 11   |
| 3'   | 27.14, CH <sub>2</sub> | 1.43, m                           | H-2', H-4'                          | C-5', 2', 1', 4'   |
| 4'   | 38.73, CH <sub>2</sub> | 1.23, m                           | H-3', H-5'                          | C-6', 7', 5', 2'   |
| 5'   | 27.99, CH              | 1.54, m                           | H-6', H-7', H-4'                    | C-6', 7', 3', 4'   |
| 6'   | 22.73, CH <sub>3</sub> | 0.87, d (6.6)                     | H-5'                                | C-7', 5', 4'       |
| 7'   | 22.73, CH <sub>3</sub> | 0.87, d (6.6)                     | H-5'                                | C-6', 5', 4';      |
| NH-a |                        | 5.68, s                           | NH-b                                | C-2                |
| NH-b |                        | 8.67, s                           | NH-a                                |                    |
| OH-4 |                        | 12.51, s                          |                                     | C-2, 4, 5          |



**Supplementary Table 2.** NMR data of compound **2** (CDCl<sub>3</sub>,  $\delta$  in ppm).

| No   | $\delta_c$             | $\delta_H$ mult ( <i>J</i> in Hz) | <sup>1</sup> H- <sup>1</sup> H COSY | HMBC               |
|------|------------------------|-----------------------------------|-------------------------------------|--------------------|
| 2    | 127.24, C              |                                   |                                     |                    |
| 3    | 171.99, C              |                                   |                                     |                    |
| 4    | 152.83, C              |                                   |                                     |                    |
| 5    | 148.02, C              |                                   |                                     |                    |
| 6    | 150.73, C              |                                   |                                     |                    |
| 7    | 137.92, C              |                                   |                                     |                    |
| 8    | 150.37, C              |                                   |                                     |                    |
| 9    | 118.60, CH             | 7.81, s                           |                                     | C-8, 11, 7         |
| 11   | 171.30, C              |                                   |                                     |                    |
| 13   | 60.97, CH <sub>3</sub> | 4.11, s                           |                                     | C-5                |
| 14   | 61.13, CH <sub>3</sub> | 3.95, s                           |                                     | C-6                |
| 1'   | 33.51, CH <sub>2</sub> | 3.06, t (7.9)                     | H-2'                                | C-2', 3', 9, 8, 11 |
| 2'   | 30.03, CH <sub>2</sub> | 1.82, m                           | H-1', H-3'                          | C-4', 3', 1', 11   |
| 3'   | 31.48, CH <sub>2</sub> | 1.41, m                           | H-4', H-2'                          | C-4', 2', 1', 5'   |
| 4'   | 22.50, CH <sub>2</sub> | 1.38, m                           | H-5', H-4'                          | C-5', 3', 2'       |
| 5'   | 14.09, CH <sub>3</sub> | 0.90, t (7.1)                     | H-4'                                | C-4', 3'           |
| NH-a |                        | 5.73, s                           | NH-b                                | C-2                |
| NH-b |                        | 8.59, s                           | NH-a                                |                    |
| OH-4 |                        | 12.48, s                          |                                     | C-2, 4, 5          |

**Supplementary Table 3.** NMR data of compound **3** (CDCl<sub>3</sub>,  $\delta$  in ppm).

| No.  | $\delta_c$             | $\delta_H$ mult ( <i>J</i> in Hz) | <sup>1</sup> H- <sup>1</sup> H COSY | HMBC                 |
|------|------------------------|-----------------------------------|-------------------------------------|----------------------|
| 2    | 127.19, C              |                                   |                                     |                      |
| 3    | 171.88, C              |                                   |                                     |                      |
| 4    | 152.80, C              |                                   |                                     |                      |
| 5    | 150.77, C              |                                   |                                     |                      |
| 6    | 148.05, C              |                                   |                                     |                      |
| 7    | 138.09, C              |                                   |                                     |                      |
| 8    | 150.41, C              |                                   |                                     |                      |
| 9    | 118.57, CH             | 7.79, s                           |                                     | C-7, 8, 11           |
| 11   | 171.47, C              |                                   |                                     |                      |
| 13   | 60.98, CH <sub>3</sub> | 4.12, s                           |                                     | C-5                  |
| 14   | 61.17, CH <sub>3</sub> | 3.94, s                           |                                     | C-6                  |
| 1'   | 31.41, CH <sub>2</sub> | 3.09, m                           | H-2'                                | C-3', 2', 11         |
| 2'a  |                        | 1.65, m                           | H-2'b, H-1'                         | C-6', 4', 1', 3', 11 |
| 2'b  | 37.05, CH <sub>2</sub> | 1.87, m                           | H-2'a, H-1',<br>H-3'                | C-6', 4', 1', 3', 11 |
| 3'   | 34.29, CH              | 1.49, m                           | H-6', 4', 2'                        | C-5', 6', 4', 1', 2' |
| 4'a  |                        | 1.23, m                           | H-4'b, H-5',<br>H-3'                | C-5', 6', 3', 2'     |
| 4'b  | 29.36, CH <sub>2</sub> | 1.42, m                           | H-4'a, H-5'                         | C-5', 6', 3', 2'     |
| 5'   | 11.46, CH <sub>3</sub> | 0.90, t (7.3)                     | H-4'                                | C-4', 3'             |
| 6'   | 19.11, CH <sub>3</sub> | 0.95, d (6.6)                     | H-3'                                | C-4', 3', 2'         |
| NH-a |                        | 5.64, s                           | NH-b                                |                      |
| NH-b |                        | 8.41, s                           | NH-a                                |                      |
| OH-4 |                        | 12.43, s                          |                                     | C-2, 4, 5            |

**Supplementary Table 4.** NMR data of compound **4** (CDCl<sub>3</sub>,  $\delta$  in ppm).

| No.  | $\delta_c$             | $\delta_H$ mult ( <i>J</i> in Hz) | <sup>1</sup> H- <sup>1</sup> H COSY | HMBC                 |
|------|------------------------|-----------------------------------|-------------------------------------|----------------------|
| 2    | 127.15, C              |                                   |                                     |                      |
| 3    | 172.02, C              |                                   |                                     |                      |
| 4    | 152.83, C              |                                   |                                     |                      |
| 5    | 148.03, C              |                                   |                                     |                      |
| 6    | 150.76, C              |                                   |                                     |                      |
| 7    | 137.92, C              |                                   |                                     |                      |
| 8    | 150.29, C              |                                   |                                     |                      |
| 9    | 118.62, CH             | 7.82, s                           |                                     | C-7, 8, 11           |
| 11   | 171.49, C              |                                   |                                     |                      |
| 13   | 60.97, CH <sub>3</sub> | 4.12, s                           |                                     | C-5'                 |
| 14   | 61.15, CH <sub>3</sub> | 3.96, s                           |                                     | C-6'                 |
| 1'   | 33.71, CH <sub>2</sub> | 3.07, t (7.8)                     | H-2'                                | C-2', 3', 11         |
| 2'   | 28.22, CH <sub>2</sub> | 1.83, m                           | H-1', H-3'                          | C-11, 4', 1', 3'     |
| 3'   | 38.54, CH <sub>2</sub> | 1.33, m                           | H-2', H-4'                          | C-5', 6', 2', 4', 1' |
| 4'   | 27.93, CH              | 1.60, m                           | H-3', H-5', H-6'                    | C-5', 6', 2', 3'     |
| 5'   | 22.65, CH <sub>3</sub> | 0.90, d (6.6)                     | H-4'                                | C-6', 4', 3'         |
| 6'   | 22.65, CH <sub>3</sub> | 0.90, d (6.6)                     | H-4'                                | C-5', 4', 3'         |
| NH-a |                        | 5.85, s                           | NH-b                                |                      |
| NH-b |                        | 8.49, s                           | NH-a                                |                      |

**Supplementary Table 5.** NMR data of compound **5** (CDCl<sub>3</sub>,  $\delta$  in ppm).

| No   | $\delta_c$             | $\delta_H$ mult ( <i>J</i> in Hz) | <sup>1</sup> H- <sup>1</sup> H COSY | HMBC                 |
|------|------------------------|-----------------------------------|-------------------------------------|----------------------|
| 2    | 127.21, C              |                                   |                                     |                      |
| 3    | 171.95, C              |                                   |                                     |                      |
| 4    | 152.82, C              |                                   |                                     |                      |
| 5    | 148.04, C              |                                   |                                     |                      |
| 6    | 150.76, C              |                                   |                                     |                      |
| 7    | 138.00, C              |                                   |                                     |                      |
| 8    | 150.38, C              |                                   |                                     |                      |
| 9    | 118.58, CH             | 7.80, s                           |                                     | C-7, 8, 11           |
| 11   | 171.44, C              |                                   |                                     |                      |
| 13   | 60.98, CH <sub>3</sub> | 4.12, s                           |                                     | C-5                  |
| 14   | 61.15, CH <sub>3</sub> | 3.95, s                           |                                     | C-6                  |
| 1'   | 31.62, CH <sub>2</sub> | 3.09, t (7.5)                     | H-2'                                | C-3', 2', 11         |
| 2'   | 39.30, CH <sub>2</sub> | 1.73, m                           | H-1', H-3'                          | C-4', 5', 3', 1', 11 |
| 3'   | 27.96, CH              | 1.70, m                           | H-2', H-4', H-5'                    | C-2', 4', 5', 1'     |
| 4'   | 22.51, CH <sub>3</sub> | 0.97, d (6.3)                     | H-3'                                | C-5', 3', 2'         |
| 5'   | 22.51, CH <sub>3</sub> | 0.97, d (6.3)                     | H-3'                                | C-4', 3', 2'         |
| NH-a |                        | 5.68, s                           |                                     |                      |
| NH-b |                        | 8.48, s                           |                                     |                      |
| OH-4 |                        | 12.44, s                          |                                     | C-2, 4, 5            |

**Supplementary Table 6.** NMR data of compound **6** (CDCl<sub>3</sub>,  $\delta$  in ppm).

| No   | $\delta_c$             | $\delta_H$ mult ( <i>J</i> in Hz) | <sup>1</sup> H- <sup>1</sup> H COSY | HMBC               |
|------|------------------------|-----------------------------------|-------------------------------------|--------------------|
| 2    | 127.24, C              |                                   |                                     |                    |
| 3    | 171.96, C              |                                   |                                     |                    |
| 4    | 152.82, C              |                                   |                                     |                    |
| 5    | 148.04, C              |                                   |                                     |                    |
| 6    | 150.75, C              |                                   |                                     |                    |
| 7    | 137.99, C              |                                   |                                     |                    |
| 8    | 150.42, C              |                                   |                                     |                    |
| 9    | 118.59, CH             | 7.81, s                           |                                     | C-7, 8, 11         |
| 11   | 171.24, C              |                                   |                                     |                    |
| 13   | 60.97, CH <sub>3</sub> | 4.11, s                           |                                     | C-5                |
| 14   | 61.15, CH <sub>3</sub> | 3.95, s                           |                                     | C-6                |
| 1'   | 33.62, CH <sub>2</sub> | 3.07, t (7.7)                     | H-2'                                | C-2', 3', 11, 8, 9 |
| 2'   | 30.31, CH <sub>2</sub> | 1.82, m                           | H-1', H-3'                          | C-3', 4', 1', 11   |
| 3'   | 29.03, CH <sub>2</sub> | 1.42, m                           | H-2', H-4'                          | C-4', 1', 5'       |
| 4'   | 31.64, CH <sub>2</sub> | 1.32, overlapped                  | H-3', H-5'                          | C-5', 3', 6', 2'   |
| 5'   | 22.66, CH <sub>2</sub> | 1.32, overlapped                  | H-4', H-6'                          | C-6', 4', 3'       |
| 6'   | 14.19, CH <sub>3</sub> | 0.89, t (6.8)                     | H-5'                                | C-5', 4'           |
| NH-a |                        | 5.65, s                           |                                     | C-2                |
| NH-b |                        | 8.59, s                           |                                     |                    |
| OH-4 |                        | 12.48, s                          |                                     | C-2, 4, 5          |

**Supplementary Table 7.** Deduced functions of ORFs in the *knm* biosynthetic gene cluster from *L. rhizosphaerae* NEAU-A2.

| <b>Genes</b> | <b>Size in AA</b> | <b>Proposed function</b>                   | <b>Protein homologue and origin</b>                    | <b>Identity/ Similarity (%)</b> | <b>Accsion number</b> |
|--------------|-------------------|--------------------------------------------|--------------------------------------------------------|---------------------------------|-----------------------|
| <i>knmE</i>  | 431               | amidohydrolase family protein              | CaeD ( <i>Actinoalloteichus cyanogriseus</i> )         | 61/74                           | AFK24521              |
| <i>knmG1</i> | 902               | AAA family ATPase                          | HOW59_23070 ( <i>Nonomuraea</i> sp.)                   | 48/63                           | NUP00804              |
| <i>knmA4</i> | 227               | thioesterase                               | CaeA4 ( <i>A. cyanogriseus</i> NRRL B-2194)            | 52/64                           | AFK24519              |
| <i>knmD</i>  | 385               | acyl-CoA dehydrogenase                     | CaeB1 ( <i>A. cyanogriseus</i> NRRL B-2194)            | 59/73                           | AFK24518              |
| <i>knmA1</i> | 1030              | NRPS                                       | CaeA3 ( <i>A. cyanogriseus</i> NRRL B-2194)            | 48/62                           | AFK24517              |
| <i>knmA2</i> | 2405              | PKS/NRPS                                   | CaeA2 ( <i>A. cyanogriseus</i> NRRL B-2194)            | 53/65                           | AFK24516              |
| <i>knmA3</i> | 1961              | NRPS                                       | EpoB ( <i>Sorangium cellulosum</i> )                   | 41/56                           | AAF62881              |
| <i>knmB1</i> | 367               | FAD-dependent monooxygenase                | CaeB6 ( <i>A. cyanogriseus</i> NRRL B-2194)            | 55/64                           | AFK24512              |
| <i>knmB2</i> | 393               | FAD-dependent monooxygenase                | HpxO ( <i>Klebsiella pneumoniae</i> )                  | 31/47                           | 3RP8                  |
| <i>knmC</i>  | 607               | asparagine synthase                        | Asparagine Synthetase B ( <i>Escherichia coli</i> )    | 32/48                           | 1CT9_A                |
| <i>knmG2</i> | 177               | MerR family transcriptional regulator      | D5S18_02340 ( <i>Nocardia panacis</i> )                | 59/73                           | RJO79203              |
| <i>knmG3</i> | 202               | TetR/AcrR family transcriptional regulator | SAMN05661093_07517 ( <i>Kibdelosporangium aridum</i> ) | 41/56                           | SMD22588              |
| <i>knmG4</i> | 412               | MFS transporter                            | D5S19_30915 ( <i>Amycolatopsis panacis</i> )           | 45/61                           | RJQ75842              |
| <i>knmG5</i> | 578               | ABC transporter ATP-binding protein        | IU483_16320 ( <i>S. gardneri</i> )                     | 61/77                           | MBF6205647            |
| <i>knmG6</i> | 596               | ABC transporter ATP-binding protein        | IU486_15890 ( <i>S. gardneri</i> )                     | 69/79                           | MBF6166235            |
| <i>knmF</i>  | 339               | O-methyltransferase                        | CaeG1 ( <i>A. cyanogriseus</i> NRRL B-2194)            | 32/48                           | AFK24511.1            |

**Supplementary Table 8.** NMR data of compound **20** (MeOD,  $\delta$  in ppm).

| No  | $\delta_c$             | $\delta_H$ mult (J in Hz) | $^1H$ - $^1H$ COSY | HMBC                      |
|-----|------------------------|---------------------------|--------------------|---------------------------|
| 2   | 152.04, C              |                           |                    |                           |
| 3   | 166.47, C              |                           |                    |                           |
| 4   | 110.16, CH             | 7.45, d (1.5)             | H-6                | C-6, 5, 3                 |
| 5   | 168.03, C              |                           |                    |                           |
| 6   | 111.65, CH             | 7.58, d (1.5)             | H-4                | C-4, 8, 5                 |
| 7   | 154.19, C              |                           |                    |                           |
| 8   | 154.91, C              |                           |                    |                           |
| 9   | 118.89, CH             | 8.22, s                   |                    | C-8, 7, 11                |
| 11  | 173.92, C              |                           |                    |                           |
| 1'  | 34.20, CH <sub>2</sub> | 3.10, t (7.6)             | H-2'               | C-3', 2', 11, (9, 8)      |
| 2'  | 31.51, CH <sub>2</sub> | 1.83, m                   | H-1', H-3'         | C-3', 4', 11              |
| 3'  | 27.94, CH <sub>2</sub> | 1.46, m                   | H-2', H-4'         | C-5', 2', 1', 4'          |
| 4'  | 39.77, CH <sub>2</sub> | 1.26, m                   | H-3', H-5'         | C-6', 7', 3', 5', 2'      |
| 5'  | 29.06, CH              | 1.57, m                   | H-4', H-6', H-7'   | C-6', 7', 3', 4'          |
| 6'  | 22.98, CH <sub>3</sub> | 0.90, d (6.6)             | H-5'               | C-7', 5', 4'              |
| 7'  | 22.98, CH <sub>3</sub> | 0.90, d (6.6)             | H-5'               | C-6', 5', 4'              |
| 1'' | 176.35, C              |                           |                    |                           |
| 2'' | 52.67, CH              | 4.69, dd (9.7, 4.4)       | H-3'',             | C-4'', 3'', 3, 1''        |
| 3'' | 42.02, CH <sub>2</sub> | 1.88, m                   | H-2'', H-4''       | C-5'', 6'', 4'', 2'', 1'' |
|     |                        | 1.77, m                   | H-2'', H-4''       | C-5'', 6'', 4'', 2'', 1'' |
| 4'' | 26.28, CH              | 1.77, m                   | H-3'', H-5''       | C-5'', 6', 2''            |
| 5'' | 23.46, CH <sub>3</sub> | 1.00, d (6.1)             | H-4''              | C-6'', 4'', 3''           |
| 6'' | 22.11, CH <sub>3</sub> | 0.99, d (6.1)             | H-4''              | C-5'', 4'', 3''           |

**Supplementary Table 9.** NMR data of compound **21** (MeOD,  $\delta$  in ppm).

| No  | $\delta_c$             | $\delta_H$ mult ( <i>J</i> in Hz) | $^1H$ - $^1H$ COSY  | HMBC                      |
|-----|------------------------|-----------------------------------|---------------------|---------------------------|
| 2   | 152.06, C              |                                   |                     |                           |
| 3   | 166.49, C              |                                   |                     |                           |
| 4   | 110.18, CH             | 7.44, d (2.2)                     | H-6                 | C-6, 5, 3                 |
| 5   | 168.18, C              |                                   |                     |                           |
| 6   | 111.68, CH             | 7.57, d (2.2)                     | H-4                 | C-4, 8, 5                 |
| 7   | 154.08, C              |                                   |                     |                           |
| 8   | 154.92, C              |                                   |                     |                           |
| 9   | 118.92, CH             | 8.21, s                           |                     | C-8, 7, 11                |
| 11  | 173.78, C              |                                   |                     |                           |
| 1'  | 34.17, CH <sub>2</sub> | 3.11, t (7.6)                     | H-2'                | C-3', 2', 11, (9, 8)      |
| 2'  | 31.87, CH <sub>2</sub> | 1.85, m                           | H-1', H-3'          | C-3', 4', 11,             |
| 3'  | 24.87, CH <sub>2</sub> | 1.53, overlapped                  | H-2', H-4'          | C-5', 2', 1', 4'          |
| 4'  | 44.33, CH <sub>2</sub> | 1.53, overlapped                  | H-3'                | C-6', 7', 3', 5', 2'      |
| 5'  | 71.33, C               |                                   |                     |                           |
| 6'  | 29.18, CH <sub>3</sub> | 1.18, s                           |                     | C-7', 5', 4'              |
| 7'  | 29.18, CH <sub>3</sub> | 1.18, s                           |                     | C-6', 5', 4'              |
| 1'' | 176.06, C              |                                   |                     |                           |
| 2'' | 52.47, CH              | 4.70, dd (9.8, 4.5)               | H-3'',              | C-4'', 3'', 3, 1''        |
| 3'' | 41.89, CH <sub>2</sub> | 1.88, m                           | H-2'', H-4''        | C-5'', 6'', 4'', 2'', 1'' |
|     |                        | 1.80, m                           | H-2'', H-4''        | C-5'', 6'', 4'', 2'', 1'' |
| 4'' | 26.26, CH              | 1.77, m                           | H-3'', H-5'', H-6'' | C-5'', 6'', 2''           |
| 5'' | 23.43, CH <sub>3</sub> | 1.00, d (6.5)                     | H-4''               | C-6'', 4'', 3''           |
| 6'' | 22.08, CH <sub>3</sub> | 0.99, d (6.5)                     | H-4''               | C-5'', 4'', 3''           |



**Supplementary Table 10.** NMR data of compound **22** (MeOD,  $\delta$  in ppm).

| No  | $\delta_c$             | $\delta_H$ mult (J in Hz) | $^1H$ - $^1H$ COSY  | HMBC                      |
|-----|------------------------|---------------------------|---------------------|---------------------------|
| 2   | 152.14, C              |                           |                     |                           |
| 3   | 166.48, C              |                           |                     |                           |
| 4   | 110.17, CH             | 7.44, d (2.2)             | H-6                 | C-6, 5, 3                 |
| 5   | 168.10, C              |                           |                     |                           |
| 6   | 111.66, CH             | 7.58, d (2.2)             | H-4                 | C-4, 8, 5                 |
| 7   | 154.10, C              |                           |                     |                           |
| 8   | 154.92, C              |                           |                     |                           |
| 9   | 118.89, CH             | 8.22, s                   |                     | C-8, 7, 11                |
| 11  | 173.93, C              |                           |                     |                           |
| 1'  | 34.16, CH <sub>2</sub> | 3.09, t (7.7)             | H-2'                | C-3', 2', 11, (9, 8)      |
| 2'  | 30.99, CH <sub>2</sub> | 1.86, m                   | H-1', H-3'          | C-3', 1', 4', 11          |
| 3'  | 32.37, CH <sub>2</sub> | 1.45, m                   | H-2', H-4'          | C-5', 2', 1', 4'          |
| 4'  | 23.44, CH <sub>2</sub> | 1.41, m                   | H-3', H-5'          | C-3', 5', 2'              |
| 5'  | 14.29, CH <sub>3</sub> | 0.94, t (7.1)             | H-4'                | C-3', 4'                  |
| 1'' | 176.26, C              |                           |                     |                           |
| 2'' | 52.62, CH              | 4.69, dd (9.8, 4.5)       | H-3'',              | C-4'', 3'', 3, 1''        |
| 3'' | 42.00, CH <sub>2</sub> | 1.89, m                   | H-2'', H-4''        | C-5'', 6'', 4'', 2'', 1'' |
|     |                        | 1.82, m                   | H-2'', H-4''        | C-5'', 6'', 4'', 2'', 1'' |
| 4'' | 26.28, CH              | 1.77, m                   | H-3'', H-5'', H-6'' | C-5'', 6', 2''            |
| 5'' | 23.42, CH <sub>3</sub> | 1.00, d (6.2)             | H-4''               | C-6'', 4'', 3''           |
| 6'' | 22.10, CH <sub>3</sub> | 0.99, d (6.2)             | H-4''               | C-5'', 4'', 3''           |

**Supplementary Table 11.** NMR data of compound **24** (DMSO-*d*<sub>6</sub>,  $\delta$  in ppm).

| No   | $\delta_c$             | $\delta_H$ mult ( <i>J</i> in Hz) | <sup>1</sup> H- <sup>1</sup> H COSY | HMBC               |
|------|------------------------|-----------------------------------|-------------------------------------|--------------------|
| 2    | 151.81, C              |                                   |                                     |                    |
| 3    | 166.10, C              |                                   |                                     |                    |
| 4    | 108.64, CH             | 7.31, d (2.2)                     | H-6                                 | C-6, 3, 5          |
| 5    | 166.98, C              |                                   |                                     |                    |
| 6    | 110.03, CH             | 7.54, d (2.2)                     | H-4                                 | C-4, 8, 5          |
| 7    | 152.37, C              |                                   |                                     |                    |
| 8    | 153.75, C              |                                   |                                     |                    |
| 9    | 118.08, CH             | 8.57, s                           |                                     | C-7, 8, 11         |
| 11   | 170.88, C              |                                   |                                     |                    |
| 1'   | 32.74, CH <sub>2</sub> | 3.03, t (7.6)                     | H-2'                                | C-2', 3', 9, 11, 8 |
| 2'   | 29.60, CH <sub>2</sub> | 1.74, m                           | H-3', H-1'                          | C-3', 1', 4', 11   |
| 3'   | 26.18, CH <sub>2</sub> | 1.37, m                           | H-4', H-2'                          | C-5', 2', 1', 4'   |
| 4'   | 38.05, CH <sub>2</sub> | 1.21, m                           | H-5', H-3'                          | C-6', 7', 2', 5'   |
| 5'   | 27.32, CH              | 1.52, m                           | H-4', H-6', H-7'                    | C-6', 7', 3', 4'   |
| 6'   | 22.50, CH <sub>3</sub> | 0.85, d (6.6)                     | H-5'                                | C-7', 5', 4'       |
| 7'   | 22.50, CH <sub>3</sub> | 0.85, d (6.6)                     | H-5'                                | C-6', 5', 4'       |
| NH-a |                        | 7.60, s                           | NH-b                                | C-2                |
| NH-b |                        | 8.35, s                           | NH-a                                | C-3                |

**Supplementary Table 12.** NMR data of compound **25** (DMSO-*d*<sub>6</sub>,  $\delta$  in ppm).

| No   | $\delta_c$             | $\delta_H$ mult ( <i>J</i> in Hz) | <sup>1</sup> H- <sup>1</sup> H COSY | HMBC               |
|------|------------------------|-----------------------------------|-------------------------------------|--------------------|
| 2    | 151.84, C              |                                   |                                     |                    |
| 3    | 166.05, C              |                                   |                                     |                    |
| 4    | 108.57, CH             | 7.31, d (2.2)                     | H-6                                 | C-6, 3, 5          |
| 5    | 166.79, C              |                                   |                                     |                    |
| 6    | 109.95, CH             | 7.55, d (2.2)                     | H-4                                 | C-4, 8, 5          |
| 7    | 152.38, C              |                                   |                                     |                    |
| 8    | 153.70, C              |                                   |                                     |                    |
| 9    | 118.13, CH             | 8.58, s                           |                                     | C-7, 8, 11         |
| 11   | 170.92, C              |                                   |                                     |                    |
| 1'   | 32.69, CH <sub>2</sub> | 3.03, t (7.6)                     | H-2'                                | C-2', 3', 9, 11, 8 |
| 2'   | 29.07, CH <sub>2</sub> | 1.77, m                           | H-3', H-1'                          | C-3', 1', 4', 11   |
| 3'   | 30.64, CH <sub>2</sub> | 1.37, m                           | H-4', H-2'                          | C-5', 2', 1', 4'   |
| 4'   | 21.83, CH <sub>2</sub> | 1.34, m                           | H-5', H-3'                          | C-2', 3', 5'       |
| 5'   | 13.88, CH <sub>3</sub> | 0.88, t (7.0)                     | H-4'                                | C-3', 4'           |
| NH-a |                        | 7.61, s                           | NH-b                                | C-2                |
| NH-b |                        | 8.35, s                           | NH-a                                | C-3                |

**Supplementary Table 13.** NMR data of compound **26** (MeOD,  $\delta$  in ppm).

| No | $\delta_c$             | $\delta_H$ mult (J in Hz) | $^1H$ - $^1H$ COSY | HMBC                 |
|----|------------------------|---------------------------|--------------------|----------------------|
| 2  | 152.23, C              |                           |                    |                      |
| 3  | 169.35, C              |                           |                    |                      |
| 4  | 110.26, CH             | 7.45, d (2.0)             | H-6                | C-6, 3, 5            |
| 5  | 168.35, C              |                           |                    |                      |
| 6  | 111.61, CH             | 7.57, d (2.0)             | H-4                | C-4, 5, 8            |
| 7  | 154.04, C              |                           |                    |                      |
| 8  | 155.01, C              |                           |                    |                      |
| 9  | 118.86, CH             | 8.23, s                   |                    | C-8, 11              |
| 11 | 173.86, C              |                           |                    |                      |
| 1' | 34.38, CH <sub>2</sub> | 3.07, t (7.6)             | H-2'               | C-2', 3', 9, 11, 8   |
| 2' | 28.97, CH <sub>2</sub> | 1.85, m                   | H-1', H-3'         | C-3', 1', 4', 11     |
| 3' | 39.43, CH <sub>2</sub> | 1.34, m                   | H-2', H-4'         | C-5', 6', 2', 1', 4' |
| 4' | 29.17, CH              | 1.62, m                   | H-3', H-5', H-6'   | C-5', 6', 2', 3'     |
| 5' | 22.89, CH <sub>3</sub> | 0.93, d (6.6)             | H-4'               | C-6', 4', 3'         |
| 6' | 22.89, CH <sub>3</sub> | 0.93, d (6.6)             | H-4'               | C-5', 4', 3'         |

**Supplementary Table 14.** NMR data of compound **32** (DMSO-*d*<sub>6</sub>,  $\delta$  in ppm).

| No   | $\delta_c$             | $\delta_H$ mult ( <i>J</i> in Hz) | <sup>1</sup> H- <sup>1</sup> H COSY | HMBC               |
|------|------------------------|-----------------------------------|-------------------------------------|--------------------|
| 2    | 152.08, C              |                                   |                                     |                    |
| 3    | 165.66, C              |                                   |                                     |                    |
| 4    | 106.56, CH             | 7.48, d (2.4)                     | H-6                                 | C-6, 3, 5          |
| 5    | 167.51, C              |                                   |                                     |                    |
| 6    | 108.08, CH             | 7.65, d (2.4)                     | H-4                                 | C-4, 8, 5          |
| 7    | 152.61, C              |                                   |                                     |                    |
| 8    | 153.22, C              |                                   |                                     |                    |
| 9    | 118.95, CH             | 8.69, s                           |                                     | C-11, 8, 7         |
| 11   | 171.26, C              |                                   |                                     |                    |
| 13   | 55.76, CH <sub>3</sub> | 3.95, s                           |                                     | C-5                |
| 1'   | 32.73, CH <sub>2</sub> | 3.05, t (7.6)                     | H-2'                                | C-11, 8, 9, 3', 2' |
| 2'   | 29.65, CH <sub>2</sub> | 1.75, m                           | H-3', H-1'                          | C-11, 3', 1', 4'   |
| 3'   | 26.18, CH <sub>2</sub> | 1.39, m                           | H-4', H-2'                          | C-5', 4', 2', 1',  |
| 4'   | 38.04, CH <sub>2</sub> | 1.22, m                           | H-5', H-3'                          | C-6', 7', 5', 2'   |
| 5'   | 27.33, CH              | 1.53, m                           | H-4', H-6', H-7'                    | C-6', 7', 3', 4'   |
| 6'   | 22.50, CH <sub>3</sub> | 0.85, d (6.6)                     | H-5'                                | C-7', 5', 4'       |
| 7'   | 22.50, CH <sub>3</sub> | 0.85, d (6.6)                     | H-5'                                | C-6', 5', 4'       |
| NH-a |                        | 7.73, s                           | NH-b                                | C-3                |
| NH-b |                        | 8.45, s                           | NH-a                                | C-2                |

**Supplementary Table 15.** NMR data of compound **33** (DMSO-*d*<sub>6</sub>,  $\delta$  in ppm).

| No   | $\delta_c$             | $\delta_H$ mult ( <i>J</i> in Hz) | <sup>1</sup> H- <sup>1</sup> H COSY | HMBC                 |
|------|------------------------|-----------------------------------|-------------------------------------|----------------------|
| 2    | 152.08, C              |                                   |                                     |                      |
| 3    | 165.65, C              |                                   |                                     |                      |
| 4    | 106.53, CH             | 7.48, d (2.3)                     | H-6                                 | C-6, 3, 5            |
| 5    | 167.50, C              |                                   |                                     |                      |
| 6    | 108.09, CH             | 7.65, d (2.3)                     | H-4                                 | C-4, 8, 5            |
| 7    | 152.60, C              |                                   |                                     |                      |
| 8    | 153.20, C              |                                   |                                     |                      |
| 9    | 118.97, CH             | 8.69, s                           |                                     | C-11, 8, 7           |
| 11   | 171.28, C              |                                   |                                     |                      |
| 13   | 55.76, CH <sub>3</sub> | 3.95, s                           |                                     | C-5                  |
| 1'   | 32.93, CH <sub>2</sub> | 3.04, t (7.6)                     | H-2'                                | C-11, 8, 9, 3', 2'   |
| 2'   | 27.31, CH <sub>2</sub> | 1.77, m                           | H-3', H-1'                          | C-11, 3', 1', 4'     |
| 3'   | 37.72, CH <sub>2</sub> | 1.28, m                           | H-4', H-2'                          | C-5', 6', 2', 4', 1' |
| 4'   | 27.22, CH              | 1.59, m                           | H-5', H-6', H-3'                    | C-5', 6', 2', 3'     |
| 5'   | 22.45, CH <sub>3</sub> | 0.88, d (6.6)                     | H-4'                                | C-6', 4', 3'         |
| 6'   | 22.45, CH <sub>3</sub> | 0.88, d (6.6)                     | H-4'                                | C-5', 4', 3'         |
| NH-a |                        | 7.73, s                           | NH-b                                | C-3                  |
| NH-b |                        | 8.45, s                           | NH-a                                | C-2                  |

**Supplementary Table 16.** NMR data of compound **35** (CDCl<sub>3</sub> δ in ppm).

| No   | δ <sub>c</sub>         | δ <sub>H</sub> mult (J in Hz) | <sup>1</sup> H- <sup>1</sup> H COSY | HMBC             |
|------|------------------------|-------------------------------|-------------------------------------|------------------|
| 2    | 129.53, C              |                               |                                     |                  |
| 3    | 172.01, C              |                               |                                     |                  |
| 4    | 148.75, C              |                               |                                     |                  |
| 5    | 156.16, C              |                               |                                     |                  |
| 6    | 108.12, CH             | 7.79, s                       |                                     | C-5, 8, 4        |
| 7    | 144.54, C              |                               |                                     |                  |
| 8    | 154.03, C              |                               |                                     |                  |
| 9    | 115.03, CH             | 7.75, s                       |                                     | C-8, 11, 7       |
| 11   | 172.04, C              |                               |                                     |                  |
| 13   | 56.51, CH <sub>3</sub> | 4.05, s                       |                                     | C-5              |
| 1'   | 33.73, CH <sub>2</sub> | 3.05, t (7.8)                 | H-2'                                | C-11, 3', 2', 8  |
| 2'   | 29.94, CH <sub>2</sub> | 1.85, m                       | H-1', H-3'                          | C-11, 4', 3', 1' |
| 3'   | 31.46, CH <sub>2</sub> | 1.44, m                       | H-2', H-4'                          | C-4',            |
| 4'   | 22.52, CH <sub>2</sub> | 1.40, m                       | H-3', H-5'                          | C-5', 2', 3'     |
| 5'   | 14.12, CH <sub>2</sub> | 0.93, t (7.1)                 | H-4'                                | C-4', 3'         |
| NH-a |                        | 5.71, s                       | NH-b                                |                  |
| NH-b |                        | 7.96, s                       | NH-a                                |                  |
| OH-4 |                        | 12.17, s                      |                                     | C-2, 4, 5        |

**Supplementary Table 17.** NMR data of compound **36** (CDCl<sub>3</sub> δ in ppm).

| No   | δ <sub>c</sub>         | δ <sub>H</sub> mult (J in Hz) | <sup>1</sup> H- <sup>1</sup> H COSY | HMBC               |
|------|------------------------|-------------------------------|-------------------------------------|--------------------|
| 2    | 129.55, C              |                               |                                     |                    |
| 3    | 172.07, C              |                               |                                     |                    |
| 4    | 148.78, C              |                               |                                     |                    |
| 5    | 156.14, C              |                               |                                     |                    |
| 6    | 108.05, CH             | 7.77, s                       |                                     | C-5, 8, 7, 4       |
| 7    | 144.37, C              |                               |                                     |                    |
| 8    | 154.20, C              |                               |                                     |                    |
| 9    | 115.26, CH             | 7.77, s                       |                                     | C-8, 11, 7         |
| 11   | 170.57, C              |                               |                                     |                    |
| 13   | 56.48, CH <sub>3</sub> | 4.04, s                       |                                     | C-5                |
| 1'   | 32.67, CH <sub>2</sub> | 3.07, t (7.5)                 | H-2'                                | C-11, 3', 2', 9, 8 |
| 2'   | 23.85, CH <sub>2</sub> | 2.12, m                       | H-1', H-3'                          | C-11, 3', 1'       |
| 3'   | 42.48, CH <sub>2</sub> | 2.58, t (7.2)                 | H-2'                                | C-2', 1', 4        |
| 4'   | 208.15, C              |                               |                                     |                    |
| 5'   | 30.23, CH <sub>3</sub> | 2.16, s                       |                                     | C-4', 3'           |
| OH-4 |                        | 12.19, s                      |                                     | C-2, 4, 5          |
| NH-a |                        | 5.96, s                       | NH-b                                |                    |
| NH-b |                        | 7.97, s                       | NH-a                                |                    |

**Supplementary Table 18.** NMR data of compound **37** (CDCl<sub>3</sub>  $\delta$  in ppm).

| No   | $\delta_c$             | $\delta_H$ mult ( <i>J</i> in Hz) | <sup>1</sup> H- <sup>1</sup> H COSY | HMBC             |
|------|------------------------|-----------------------------------|-------------------------------------|------------------|
| 2    | 129.70, C              |                                   |                                     |                  |
| 3    | 172.18, C              |                                   |                                     |                  |
| 4    | 148.89, C              |                                   |                                     |                  |
| 5    | 156.15, C              |                                   |                                     |                  |
| 6    | 107.71, CH             | 7.67, s                           |                                     | C-4, 8, 5        |
| 7    | 144.08, C              |                                   |                                     |                  |
| 8    | 153.97, C              |                                   |                                     |                  |
| 9    | 115.08, CH             | 7.70, s                           |                                     | C-7, 8, 11       |
| 11   | 171.76, C              |                                   |                                     |                  |
| 13   | 56.48, CH <sub>3</sub> | 4.04, s                           |                                     | C-5              |
| 1'   | 33.17, CH <sub>2</sub> | 3.11, m                           | H-2'                                | C-11, 3', 2'     |
| 2'   | 25.33, CH <sub>2</sub> | 2.00, m                           | H-3', 1'                            | C-1', 3', 4', 11 |
| 3'   | 38.65, CH <sub>2</sub> | 1.62, m                           | H-4', 2'                            | C-5', 2', 1', 4' |
| 4'   | 67.33, CH              | 3.90, m                           | H-5', 3'                            | C-5', 3'         |
| 5'   | 23.78, CH <sub>3</sub> | 1.22, d (6.2)                     | H-4'                                | C-3', 4'         |
| NH-a |                        | 5.74, s                           | NH-b                                |                  |
| NH-b |                        | 8.33, s                           | NH-a                                |                  |
| OH-4 |                        | 12.31, s                          |                                     | C-2, 4, 5        |

**Supplementary Table 19.** NMR data of compound **28** (Acetone-*d*<sub>6</sub>,  $\delta$  in ppm).

| No   | $\delta_c$             | $\delta_H$ mult ( <i>J</i> in Hz) | <sup>1</sup> H- <sup>1</sup> H COSY | HMBC                 |
|------|------------------------|-----------------------------------|-------------------------------------|----------------------|
| 2    | 124.92, C              |                                   |                                     |                      |
| 3    | 172.92, C              |                                   |                                     |                      |
| 4    | 149.16, C              |                                   |                                     |                      |
| 5    | 141.16, C              |                                   |                                     |                      |
| 6    | 148.87, C              |                                   |                                     |                      |
| 7    | 129.62, C              |                                   |                                     |                      |
| 8    | 154.21, C              |                                   |                                     |                      |
| 9    | 115.73, CH             | 8.36, s                           |                                     | C-7, 8, 11, 1'       |
| 11   | 172.89, C              |                                   |                                     |                      |
| 1'   | 33.40, CH <sub>2</sub> | 3.18, t (7.6)                     | H-2'                                | C-3', 2', 11, 8, 9   |
| 2'   | 30.70, CH <sub>2</sub> | 1.86, m                           | H-1', H-3'                          | C-3', 1', 4', 11     |
| 3'   | 27.45, CH <sub>2</sub> | 1.47, m                           | H-2', H-4'                          | C-2', 1', 4'         |
| 4'   | 39.31, CH <sub>2</sub> | 1.28, m                           | H-3', H-5'                          | C-6', 7', 3', 5', 2' |
| 5'   | 28.62, CH              | 1.57, m                           | H-4', H-6, H-7                      | C-6', 7', 3', 4'     |
| 6'   | 22.91, CH <sub>3</sub> | 0.88, d (6.6)                     | H-5'                                | C-7', 5', 4'         |
| 7'   | 22.91, CH <sub>3</sub> | 0.88, d (6.6)                     | H-5'                                | C-6', 5', 4'         |
| NH-a |                        | 7.19, s                           |                                     |                      |
| NH-b |                        | 12.12, s                          |                                     |                      |
| OH-4 |                        | 12.63, s                          |                                     | C-2, 5, 4            |

**Supplementary Table 20.** NMR data of compound **30** (CDCl<sub>3</sub>,  $\delta$  in ppm).

| No   | $\delta_c$             | $\delta_H$ mult ( <i>J</i> in Hz) | <sup>1</sup> H- <sup>1</sup> H COSY | HMBC             |
|------|------------------------|-----------------------------------|-------------------------------------|------------------|
| 2    | 123.98, C              |                                   |                                     |                  |
| 3    | 171.69, C              |                                   |                                     |                  |
| 4    | 152.89, C              |                                   |                                     |                  |
| 5    | 142.34, C              |                                   |                                     |                  |
| 6    | 150.49, C              |                                   |                                     |                  |
| 7    | 129.99, C              |                                   |                                     |                  |
| 8    | 152.98, C              |                                   |                                     |                  |
| 9    | 113.92, CH             | 7.78, s                           |                                     | C-7, 8, 11       |
| 11   | 171.89, C              |                                   |                                     |                  |
| 13   | 60.75, CH <sub>3</sub> | 4.12, s                           |                                     | C-5              |
| 1'   | 33.17, CH <sub>2</sub> | 3.08, t (7.7)                     | H-2'                                | C-3', 2', 11     |
| 2'   | 29.91, CH <sub>2</sub> | 1.25, m                           | H-3'                                | C-3'             |
|      |                        | 1.84, m                           | H-3', H-1'                          | C-3', 1', 4', 11 |
| 3'   | 26.89, CH <sub>2</sub> | 1.42, m                           | H-2', H-4'                          | C-5', 2', 1', 4' |
| 4'   | 38.65, CH <sub>2</sub> | 1.23, s                           | H-3', H-5'                          | C-6', 7', 2', 5' |
| 5'   | 27.96, CH              | 1.55, m                           | H-4', H-6', H-7'                    | C-6, 7', 4'      |
| 6'   | 22.71, CH <sub>3</sub> | 0.88, d (6.6)                     | H-5'                                | C-7', 5', 4'     |
| 7'   | 22.71, CH <sub>3</sub> | 0.88, d (6.6)                     | H-5'                                | C-6', 5', 4'     |
| NH-a |                        | 5.56, s                           | NH-b                                |                  |
| NH-b |                        | 7.63, s                           | NH-a                                |                  |
| OH-4 |                        | 12.12, s                          |                                     | C-2, 5, 4        |
| OH-6 |                        | 12.55, s                          |                                     | C-7, 5, 6        |

**Supplementary Table 21.** Strains and plasmids used and generated in this study.

| Strains/plasmids                            | Purpose                                                                             | Sources    |
|---------------------------------------------|-------------------------------------------------------------------------------------|------------|
| <i>E. coli</i>                              |                                                                                     |            |
| ET12567/pUZ8002                             | Donor strain for conjugation                                                        | Ref. 7     |
| BW25113/pIJ790                              | Host strain for PCR targeting                                                       | Ref. 8     |
| DH5 $\alpha$ /BT340                         | Host strain for in-frame deletion                                                   | Ref. 9     |
| XL1-Blue                                    | Construction of gene library                                                        | Agilent    |
| DH5 $\alpha$                                | Host strain for cloning                                                             | Invitrogen |
| BL21(DE3)                                   | Heterologous host for protein expression                                            | NEB        |
| <b>strain</b>                               |                                                                                     |            |
| NEAU-A2                                     | Kn <sup>r</sup> aminocyclins wild type producing strain                             | This study |
| NEAU-A2- $\Delta knmE$                      | <i>knmE</i> inactivation mutant of <i>L. rhizosphaerae</i><br>NEAU-A2               | This study |
| NEAU-A2- $\Delta knmA1$                     | <i>knmA1</i> inactivation mutant of <i>L. rhizosphaerae</i><br>NEAU-A2              | This study |
| NEAU-A2- $\Delta knmA2$                     | <i>knmA2</i> inactivation mutant of <i>L. rhizosphaerae</i><br>NEAU-A2              | This study |
| NEAU-A2- $\Delta knmB1$                     | <i>knmB1</i> inactivation mutant of <i>L. rhizosphaerae</i><br>NEAU-A2              | This study |
| NEAU-A2- $\Delta knmB2$                     | <i>knmB2</i> inactivation mutant of <i>L. rhizosphaerae</i><br>NEAU-A2              | This study |
| NEAU-A2- $\Delta knmC$                      | <i>knmC</i> inactivation mutant of <i>L. rhizosphaerae</i><br>NEAU-A2               | This study |
| NEAU-A2- $\Delta knmF$                      | <i>knmF</i> inactivation mutant of <i>L. rhizosphaerae</i><br>NEAU-A2               | This study |
| <i>S. albus</i> J1074                       | Host strain for heterologous expression                                             | Ref. 10    |
| <i>S. albus</i> 5C1                         | <i>S. albus</i> J1074 integrated with plasmid 5C1<br>which contains <i>knm</i> BGCs | This study |
| <i>S. albus</i> 5C1-<br>$\Delta knmE$       | <i>knmE</i> inactivation mutant of <i>S. albus</i> 5C1                              | This study |
| <i>S. albus</i> 5C1-<br>$\Delta knmB1$      | <i>knmB1</i> inactivation mutant of <i>S. albus</i> 5C1                             | This study |
| <i>S. albus</i> 5C1-<br>$\Delta knmB2$      | <i>knmB2</i> inactivation mutant of <i>S. albus</i> 5C1                             | This study |
| <i>S. albus</i> 5C1-<br>$\Delta knmC$       | <i>knmC</i> inactivation mutant of <i>S. albus</i> 5C1                              | This study |
| <i>S. albus</i> 5C1-<br>$\Delta knmF$       | <i>knmF</i> inactivation mutant of <i>S. albus</i> 5C1                              | This study |
| <i>S. albus</i> -5C1-<br>$\Delta knmC/knmC$ | <i>knmC</i> complement strain                                                       | This study |
| <b>Plasmids</b>                             |                                                                                     |            |
| pSuperCos I                                 | Kan <sup>r</sup> , Cosmid vector for genomic library                                | Stratagene |



|                             |                                                                                                                                                                                                                                         |            |
|-----------------------------|-----------------------------------------------------------------------------------------------------------------------------------------------------------------------------------------------------------------------------------------|------------|
|                             | construction                                                                                                                                                                                                                            |            |
| pJTU2554                    | Apr <sup>r</sup> , Cosmid vector for genomic library construction                                                                                                                                                                       | Ref. 8     |
| pJTU6722                    | Ery <sup>r</sup> , Vector for PCR targeting                                                                                                                                                                                             | Ref. 11    |
| pIJ773                      | Apr <sup>r</sup> , Vector for PCR targeting                                                                                                                                                                                             | Ref. 12    |
| p5C1                        | Apr <sup>r</sup> , Cosmid which contains <i>knm</i> biosynthetic gene cluster                                                                                                                                                           | This study |
| pS4H1                       | A cosmid which contains partial <i>knm</i> biosynthetic gene cluster                                                                                                                                                                    | This study |
| pS20G3                      | A cosmid which contains partial <i>knm</i> biosynthetic gene cluster                                                                                                                                                                    | This study |
| pS12G3                      | A cosmid which contains partial <i>knm</i> biosynthetic gene cluster                                                                                                                                                                    | This study |
| p5C1- $\Delta$ <i>knmE</i>  | Apr <sup>r</sup> , gene inactivation clone used for $\Delta$ <i>knmE</i> mutant                                                                                                                                                         | This study |
| p5C1- $\Delta$ <i>knmB1</i> | Apr <sup>r</sup> , gene inactivation clone used for $\Delta$ <i>knmB1</i> mutant                                                                                                                                                        | This study |
| p5C1- $\Delta$ <i>knmB2</i> | Apr <sup>r</sup> , gene inactivation clone used for $\Delta$ <i>knmB2</i> mutant                                                                                                                                                        | This study |
| p5C1- $\Delta$ <i>knmC</i>  | Apr <sup>r</sup> , gene inactivation clone used for $\Delta$ <i>knmC</i> mutant                                                                                                                                                         | This study |
| p5C1- $\Delta$ <i>knmF</i>  | Apr <sup>r</sup> , gene inactivation clone used for $\Delta$ <i>knmF</i> mutant                                                                                                                                                         | This study |
| pET28a                      | Kan <sup>r</sup> , Protein expression vector used in <i>E. coli</i> , encoding N-terminal His-tag                                                                                                                                       | Novagen    |
| pET32a                      | Amp <sup>r</sup> , Protein expression vector used in <i>E. coli</i> , encoding N-terminal a thioredoxin (Trx)-tag (109 residues), 6X His-tag (6 residues), a thrombin site (6 residues), a S-tag (15 residues) and an enterokinase site | Novagen    |
| pGro7                       | Cml <sup>r</sup> , Protein coexpression vector used to increase recovery of target proteins in the soluble fraction in <i>E. coli</i>                                                                                                   | Takara     |

**Supplementary Table 22.** Primers used in this study.

| <b>Primer</b>              | <b>Sequence (5' to 3')</b>                                      |
|----------------------------|-----------------------------------------------------------------|
| <b>For PCR targeting</b>   |                                                                 |
| ΔKnmE-F                    | cagcgtccgcgacctcggcggctacggcgtgcacctcgcATTCCGGGGA<br>TCCGTCGACC |
| ΔKnmE-R                    | gatgttctcggccagccgtgccaccttgaccgccagTGTAGGCTGGA<br>GCTGCTTC     |
| ΔKnmB1-F                   | gcccggcggcctgcgcatgatcacctgacctgccaggaATTCCGGGG<br>ATCCGTCGACC  |
| ΔKnmB1-R                   | ggtgcccgcgccctggcccagcgtcggcggcatggcatgTGTAGGCTG<br>GAGCTGCTTC  |
| ΔKnmB2-F                   | gcgagttctaccagcggcacggcacccttcgctcgtcaATTCCGGGGA<br>TCCGTCGACC  |
| ΔKnmB2-R                   | tgtgccgcgtccccgagcaacgtgatccgccccttgctcTGTAGGCTGGA<br>GCTGCTTC  |
| ΔKnmC-F                    | tcaacggagagatctacaactccgtgaactgcgcaacgATTCCGGGGA<br>TCCGTCGACC  |
| ΔKnmC-R                    | cgccaccgtcgagcgcactctgactcccggaacagcagTGTAGGCTGG<br>AGCTGCTTC   |
| ΔKnmF-F                    | actgctcgagtcggaaggcagacttccggaactccgcATTCCGGGGA<br>TCCGTCGACC   |
| ΔKnmF-R                    | ctcaggaccccagttgtgcagcaccgtcgacagcagtgTGTAGGCTGG<br>AGCTGCTTC   |
| ΔKnmA1-F                   | ttctcgcccgttcggcgactccgactgagaggcagtgATTCCGGGGAT<br>CCGTCGACC   |
| ΔKnmA1-R                   | gaactcccggacggtgtcccgccactcctgctcagtcacTGTAGGCTGG<br>AGCTGCTTC  |
| ΔKnmA2-F                   | ctctgaaaaccccgacgcaccacggaggactaccagtgATTCCGGGG<br>ATCCGTCGACC  |
| ΔKnmA2-R                   | gtacaggtcctcgatgttcttcgccatcactgccttcaTGTAGGCTGGAG<br>CTGCTTC   |
| <b>For gene validation</b> |                                                                 |
| KnmE-check-F               | gcgcaagccacactgacgat                                            |
| KnmE-check-R               | tggaccgaggatggggaagc                                            |
| KnmA1-check-F              | cttcggcgactccgactgag                                            |
| KnmA1-check-R              | gacggtgtcccgccactcct                                            |
| KnmB2-check-F              | gagatgctcgtccgtgtga                                             |
| KnmB2-check-R              | gatctcgacgtgctcgtca                                             |
| KnmC-check-F               | cgattccacgacggggagga                                            |
| KnmC-check-R               | catcagctaccctgaccac                                             |
| KnmF-check-F               | caaggggaaatggcgtggtt                                            |
| KnmF-check-R               | tcgtcgtcacgaagggtcgc                                            |
| KnmA2-check-F              | tgaaaaccccgacgcaccac                                            |

|                           |                                          |
|---------------------------|------------------------------------------|
| KnmA2-check-R             | tgttcttcgcatcactgcc                      |
| KnmB1-check-F             | gacaggtcacggaggcgcggt                    |
| KnmB1-check-R             | gacgaaggcggcggtccacc                     |
| <b>Protein expression</b> |                                          |
| KnmF-ND-F-28a             | GTGCCGCGCGGCAGCCATATGgtggtcaccgcatgccgct |
| KnmF-SA-R-28a             | TGCGGCCGCAAGCTTGTTCGACtcagtgcggcttgctcca |
| KnmB2-BM-F-32a            | CGCGGATCCatgaacgtgcggtgatcggg            |
| KnmB2-HD-R-32a            | CCCAAGCTTtcacgaccgcgctccgtga             |
| KnmB1-BM-F-32a            | CGCGGATCCgtgagacgacacgtcgagatcgcg        |
| KnmB1-HD-R-32a            | CCCAAGCTTtcaaccgcgtggcgagcgc             |

**Supplementary Table 23.** Primers used for constructing KnmB1 and KnmB2 protein variants.

| <b>Primer</b>  | <b>Sequence (5' to 3')</b>                    |
|----------------|-----------------------------------------------|
| KnmB1-N219D1-F | gccatggctgatatcggatccgtgagacgacacgtcgagatc    |
| KnmB1-N219D1-R | accgtcgggggcaccgaggtcgaggtacaggtccgtggagt     |
| KnmB1-N219D2-F | gacctcggtgcccccgacggt                         |
| KnmB1-N219D2-R | ctcgagtgcggccgcaagctttcaaccgcgtggcgagcgcgccg  |
| KnmB1-R205A1-F | gccatggctgatatcggatccgtgagacgacacgtcgagatcg   |
| KnmB1-R205A1-R | ttgcacggcacgtacagcaccgcccgggagctccacgttcca    |
| KnmB1-R205A2-F | gcggtgctgtacgtgccgtgcaa                       |
| KnmB1-R205A2-R | ctcgagtgcggccgcaagctttcaaccgcgtggcgagcgcgccg  |
| KnmB1-Y217A1-F | gccatggctgatatcggatccgtgagacgacacgtcgagatcg   |
| KnmB1-Y217A1-R | ggggcaccgaggttgagtgccaggtccgtggagttgcacg      |
| KnmB1-Y217A2-F | gcactcaacctcgggtccccga                        |
| KnmB1-Y217A2-R | ctcgagtgcggccgcaagctttcaaccgcgtggcgagcgcg     |
| KnmB1-Y217F1-F | gccatggctgatatcggatccgtgagacgacacgtcgagatcgcg |
| KnmB1-Y217F1-R | tcgggggcaccgaggttgaggaacaggtccgtggagttgcacg   |
| KnmB1-Y217F2-F | ttcctcaacctcgggtccccga                        |
| KnmB1-Y217F2-R | ctcgagtgcggccgcaagctttcaaccgcgtggcgagcgcgccg  |
| KnmB1-Y262A1-F | gccatggctgatatcggatccgtgagacgacacgtcgagatcg   |
| KnmB1-Y262A1-R | cgcagccgcagcacctctgcccggtcgaacctggcgccg       |
| KnmB1-Y262A2-F | gcagaggtgctgcggctgcgca                        |
| KnmB1-Y262A2-R | ctcgagtgcggccgcaagctttcaaccgcgtggcgagcgcg     |
| KnmB2-F205A1-F | gccatggctgatatcggatccatgaacgttgcggtgatcgg     |
| KnmB2-F205A1-R | cgggccgagcggcgcaaggccatgccgagaccagggccga      |
| KnmB2-F205A2-F | gccttcgcccgcctcggccccg                        |
| KnmB2-F205A2-R | ctcgagtgcggccgcaagctttcacgaccgcgcctccgtga     |
| KnmB2-N291D1-F | gccatggctgatatcggatccatgaacgttgcggtgatcgg     |
| KnmB2-N291D1-R | cgcgccctggccgaggaagtgcggtcatggcgtgtgccgct     |
| KnmB2-N291D2-F | gacttctcggccagggcgcg                          |
| KnmB2-N291D2-R | ctcgagtgcggccgcaagctttcacgaccgcgcctccgtga     |
| KnmB2-Y215A1-F | gccatggctgatatcggatccatgaacgttgcggtgatcgg     |
| KnmB2-Y215A1-R | atgatcgtggcggtccatgccatctcgccgggcccagcg       |
| KnmB2-Y215A2-F | gcatggaccgccacgatcatctc                       |
| KnmB2-Y215A2-R | ctcgagtgcggccgcaagctttcacgaccgcgcctccgtga     |
| KnmB2-Y215F1-F | gccatggctgatatcggatccatgaacgttgcggtgatcggtg   |
| KnmB2-Y215F1-R | gagatgatcgtggcggtccagaacatctcgccgggcccagcg    |
| KnmB2-Y215F2-F | ttctggaccgccacgatcatctc                       |
| KnmB2-Y215F2-R | ctcgagtgcggccgcaagctttcacgaccgcgcctccgtga     |

**Supplementary Table 24.** NMR data of compound **29** (DMSO-*d*<sub>6</sub>,  $\delta$  in ppm).

| No   | $\delta_c$             | $\delta_H$ mult ( <i>J</i> in Hz) | <sup>1</sup> H- <sup>1</sup> H COSY | HMBC               |
|------|------------------------|-----------------------------------|-------------------------------------|--------------------|
| 2    | 123.79, C              |                                   |                                     |                    |
| 3    | 171.91, C              |                                   |                                     |                    |
| 4    | 148.03, C              |                                   |                                     |                    |
| 5    | 140.11, C              |                                   |                                     |                    |
| 6    | 144.49, C              |                                   |                                     |                    |
| 7    | 128.33, C              |                                   |                                     |                    |
| 8    | 152.57, C              |                                   |                                     |                    |
| 9    | 115.81, CH             | 8.58, overlapped                  |                                     | C-7, 8, 11         |
| 11   | 171.55, C              |                                   |                                     |                    |
| 1'   | 32.01, CH <sub>2</sub> | 3.11, t (7.5)                     | H-2'                                | C-2', 3', 9, 8, 11 |
| 2'   | 28.70, CH <sub>2</sub> | 1.78, m                           | H-1', H-3'                          | C-4', 3', 1', 11   |
| 3'   | 30.50, CH <sub>2</sub> | 1.35, overlapped                  | H-4', H-2'                          | C-4', 2', 5'       |
| 4'   | 21.80, CH <sub>2</sub> | 1.35, overlapped                  | H-5', H-4'                          | C-5', 3', 2'       |
| 5'   | 13.84, CH <sub>3</sub> | 0.87, t (6.9)                     | H-4'                                | C-4', 3'           |
| NH-a |                        | 8.06, s                           | NH-b                                | C-2                |
| NH-b |                        | 8.58, overlapped                  | NH-a                                | C-3                |
| OH-4 |                        | 12.79, s                          |                                     | C-2, 5, 4          |
| OH-6 |                        | 12.02, s                          |                                     |                    |

**Supplementary Table 25.** NMR data of compound **31** (DMSO-*d*<sub>6</sub>,  $\delta$  in ppm).

| No   | $\delta_c$             | $\delta_H$ mult ( <i>J</i> in Hz) | <sup>1</sup> H- <sup>1</sup> H COSY | HMBC                |
|------|------------------------|-----------------------------------|-------------------------------------|---------------------|
| 2    | 124.13, C              |                                   |                                     |                     |
| 3    | 171.76, C              |                                   |                                     |                     |
| 4    | 152.12, C              |                                   |                                     |                     |
| 5    | 141.41, C              |                                   |                                     |                     |
| 6    | 149.25, C              |                                   |                                     |                     |
| 7    | 129.19, C              |                                   |                                     |                     |
| 8    | 152.21, C              |                                   |                                     |                     |
| 9    | 116.21, CH             | 8.64, overlapped                  |                                     | C-8, 11             |
| 11   | 171.66, C              |                                   |                                     |                     |
| 13   | 59.84, CH <sub>3</sub> | 3.91, s                           |                                     | C-5                 |
| 1'   | 31.99, CH <sub>2</sub> | 3.12, t (7.5)                     | H-2'                                | C-2', 3', 11        |
| 2'   | 28.76, CH <sub>2</sub> | 1.78, m                           | H-1', H-3'                          | C-4', 3', 1',<br>11 |
| 3'   | 30.51, CH <sub>2</sub> | 1.35, overlapped                  | H-4', H-2'                          | C-4', 2', 5'        |
| 4'   | 21.77, CH <sub>2</sub> | 1.35, overlapped                  | H-5', H-4'                          | C-5', 3', 2'        |
| 5'   | 13.85, CH <sub>3</sub> | 0.88, t (7.0)                     | H-4'                                | C-4', 3'            |
| NH-a |                        | 8.12, s                           | NH-b                                |                     |
| NH-b |                        | 8.64, overlapped                  | NH-a                                | C-3                 |
| OH-4 |                        | 12.33, s                          |                                     |                     |
| OH-6 |                        | 13.07, s                          |                                     |                     |

**Supplementary Table 26.** NMR data of compound **34** (DMSO-*d*<sub>6</sub>,  $\delta$  in ppm).

| No   | $\delta_c$ | $\delta_H$ mult ( <i>J</i> in Hz) | <sup>1</sup> H- <sup>1</sup> H COSY | HMBC               |
|------|------------|-----------------------------------|-------------------------------------|--------------------|
| 2    | 152.09     |                                   |                                     |                    |
| 3    | 165.70     |                                   |                                     |                    |
| 4    | 106.58     | 7.48, d (2.4)                     | H-6                                 | C-3, 5, 6          |
| 5    | 167.53     |                                   |                                     |                    |
| 6    | 108.13     | 7.65, d (2.4)                     | H-4                                 | C-4, 5, 8          |
| 7    | 152.63     |                                   |                                     |                    |
| 8    | 153.23     |                                   |                                     |                    |
| 9    | 118.97     | 8.68, s                           |                                     | C-7, 8, 11         |
| 11   | 171.34     |                                   |                                     |                    |
| 13   | 55.79      | 3.95, s,                          |                                     | C-5                |
| 1'   | 32.72      | 3.05, t (7.7)                     | H-2'                                | C-2', 3', 9, 11, 8 |
| 2'   | 29.15      | 1.77, m                           | H-3', H-1'                          | C-3', 1', 4', 11   |
| 3'   | 30.68      | 1.36, overlapped                  | H-4', H-2'                          | C-5', 2', 1', 4'   |
| 4'   | 21.83      | 1.36, overlapped                  | H-5', H-3'                          | C-2', 3', 5'       |
| 5'   | 13.90      | 0.88, t (7.1)                     | H-4'                                | C-3', 4'           |
| NH-a |            | 7.73, s                           |                                     | C-2                |
| NH-b |            | 8.45, s                           |                                     | C-3                |

## Supplementary Figures

### User Spectra

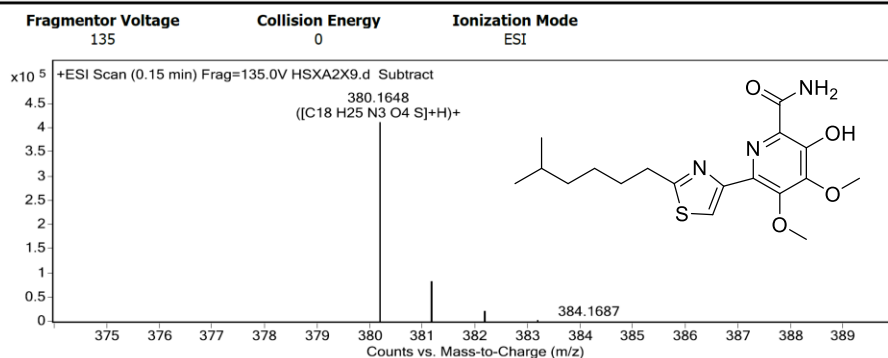

Supplementary Figure 1. HRESIMS spectrum of compound 1.

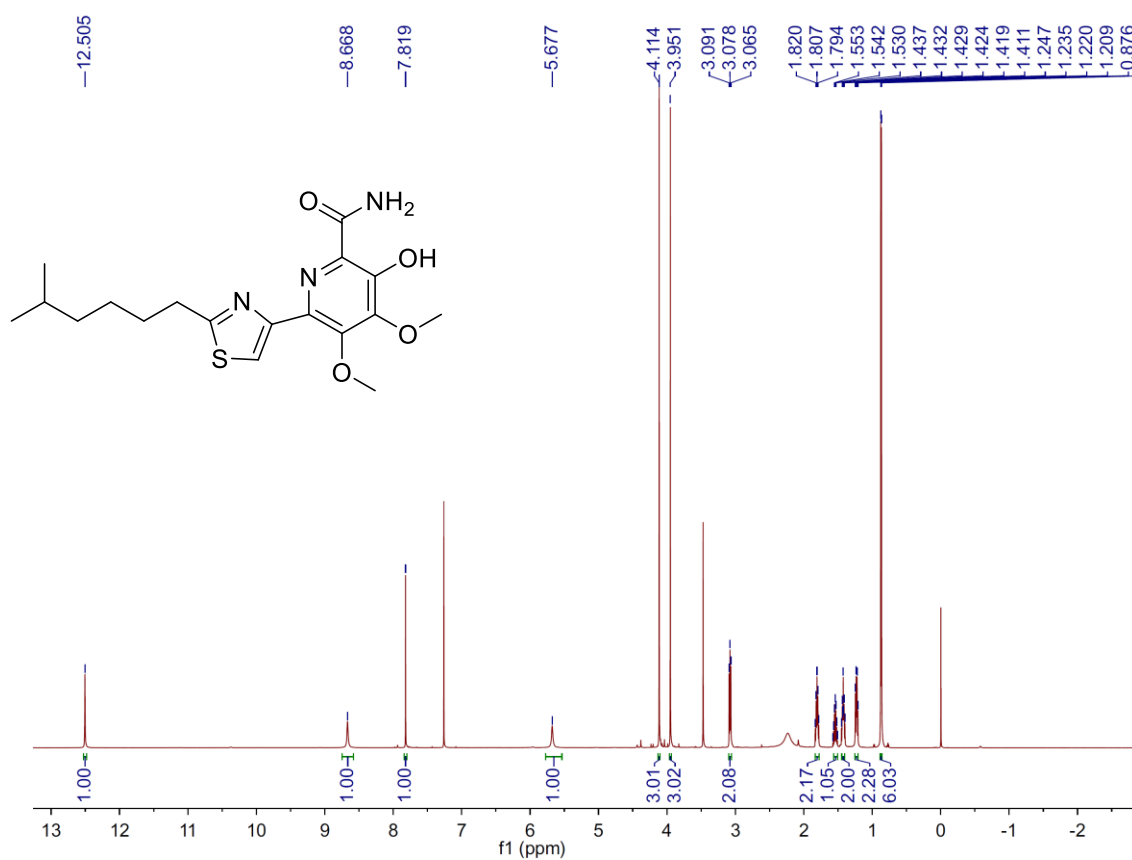

Supplementary Figure 2. <sup>1</sup>H-NMR (600 MHz) spectrum of compound 1 in CDCl<sub>3</sub>.

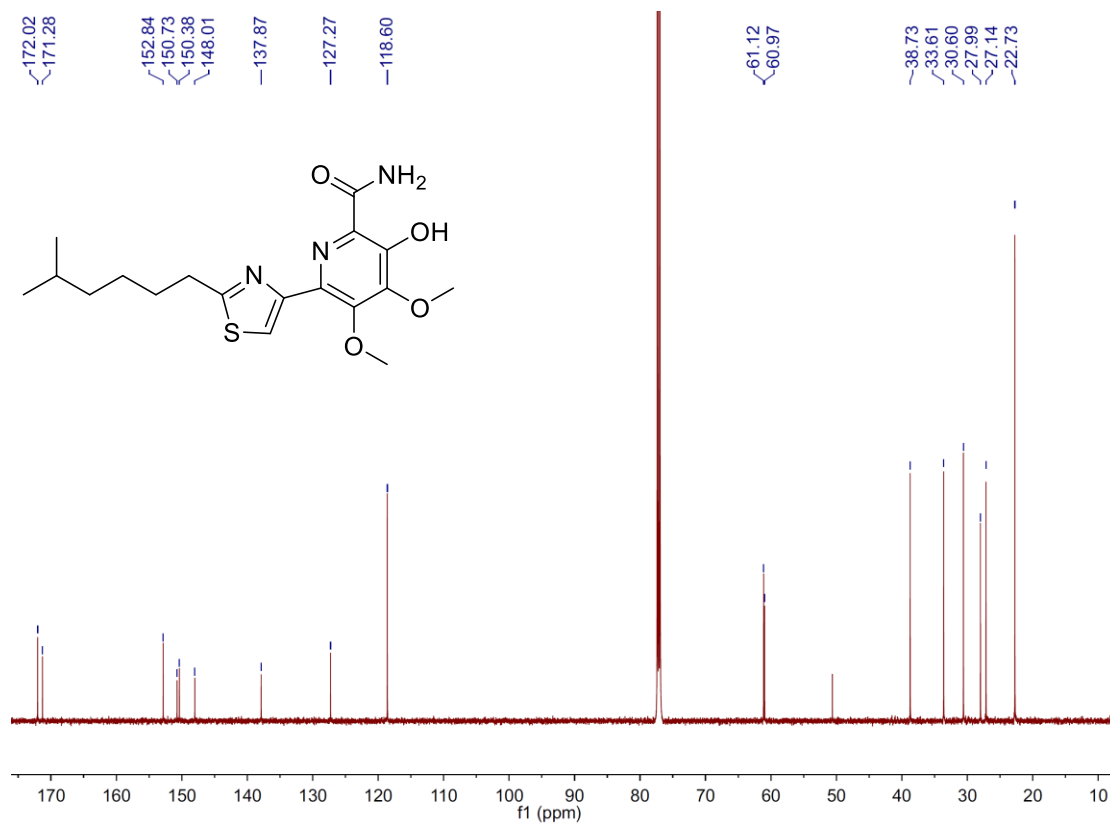

**Supplementary Figure 3.**  $^{13}\text{C}$ -NMR (150 MHz) spectrum of compound 1 in  $\text{CDCl}_3$ .

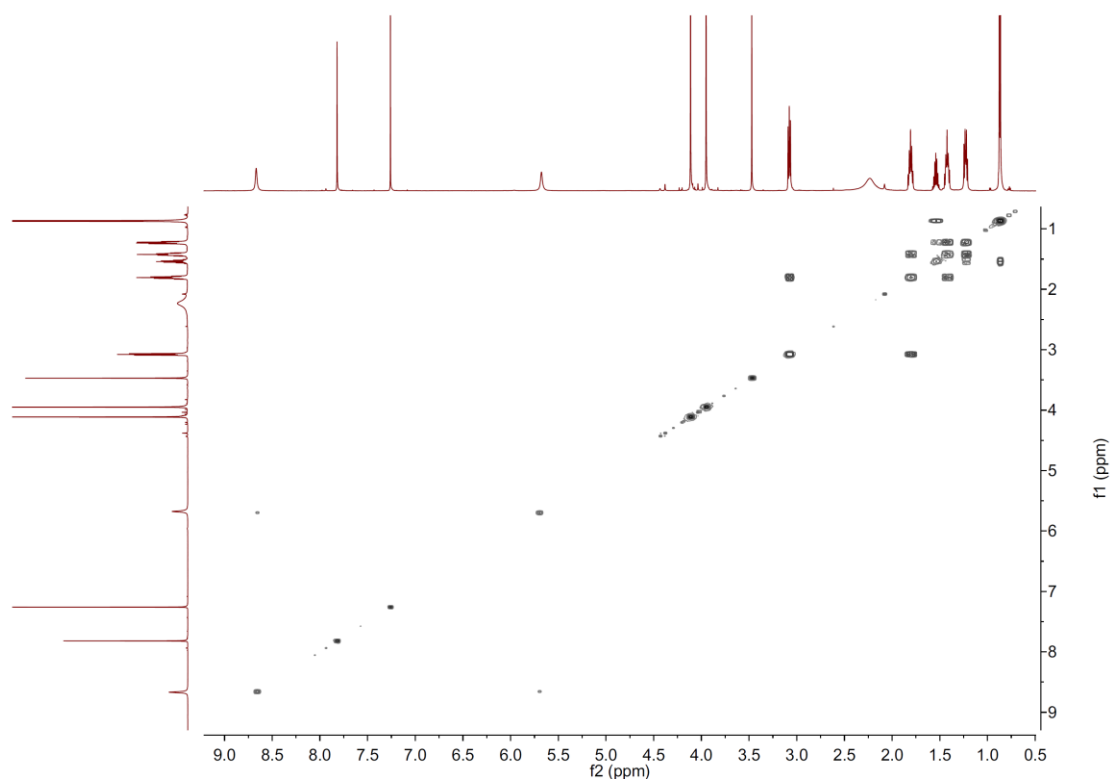

**Supplementary Figure 4.**  $^1\text{H}$ - $^1\text{H}$  COSY (600 MHz) spectrum of compound 1 in  $\text{CDCl}_3$ .



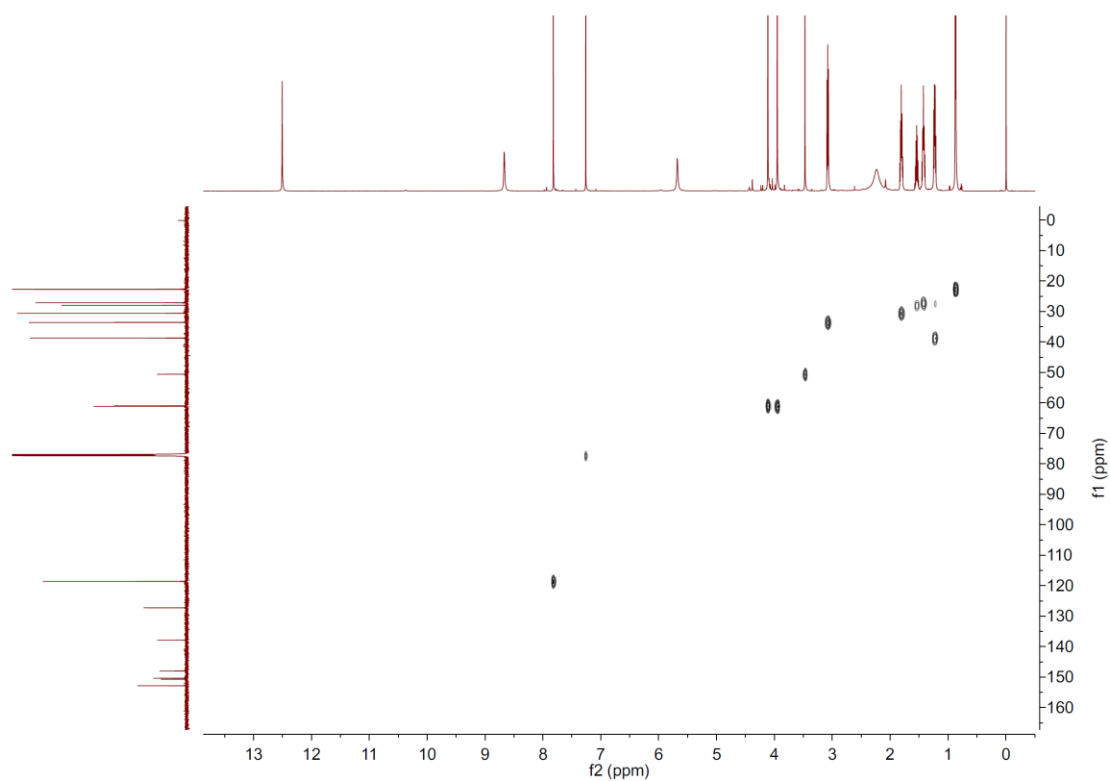

**Supplementary Figure 5.** HSQC (600 MHz) spectrum of compound **1** in CDCl<sub>3</sub>.

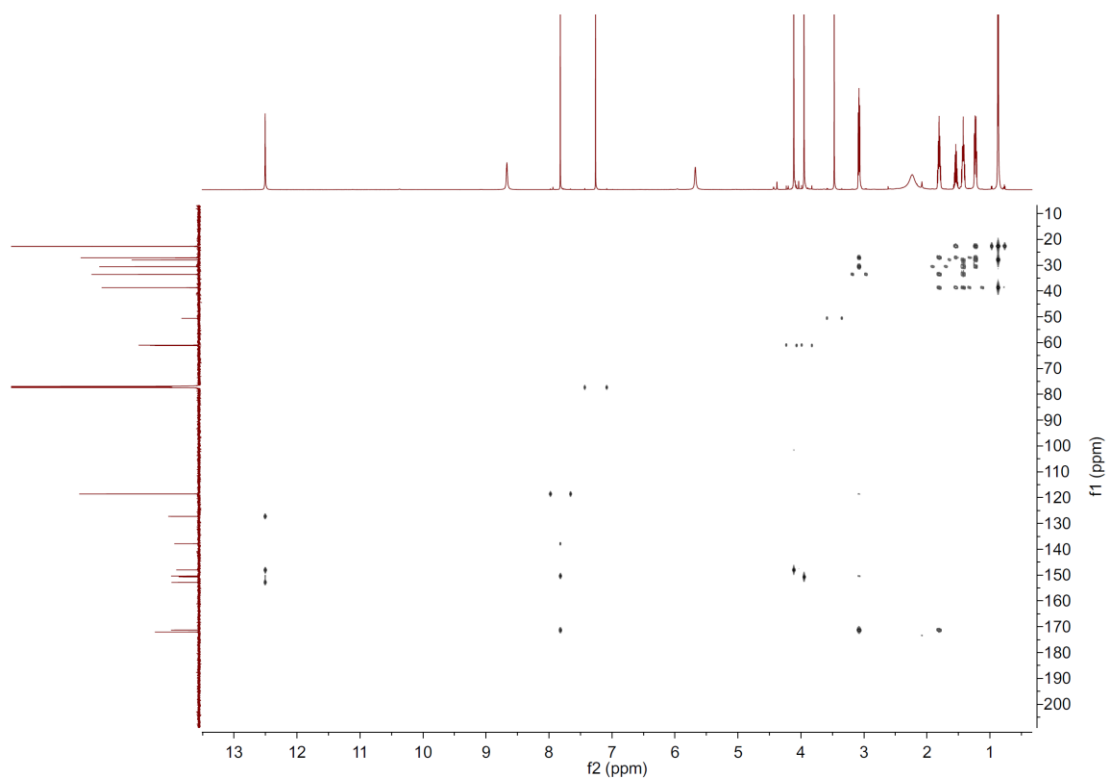

**Supplementary Figure 6.** HMBC (600 MHz) spectrum of compound **1** in CDCl<sub>3</sub>.

## User Spectra

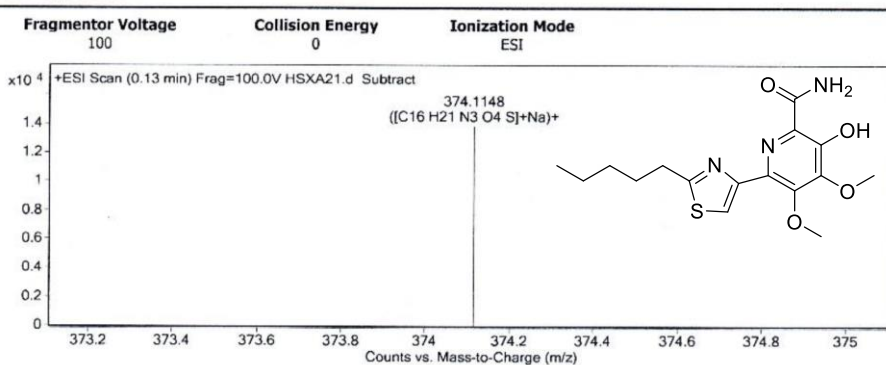

Supplementary Figure 7. HRESIMS spectrum of compound 2.

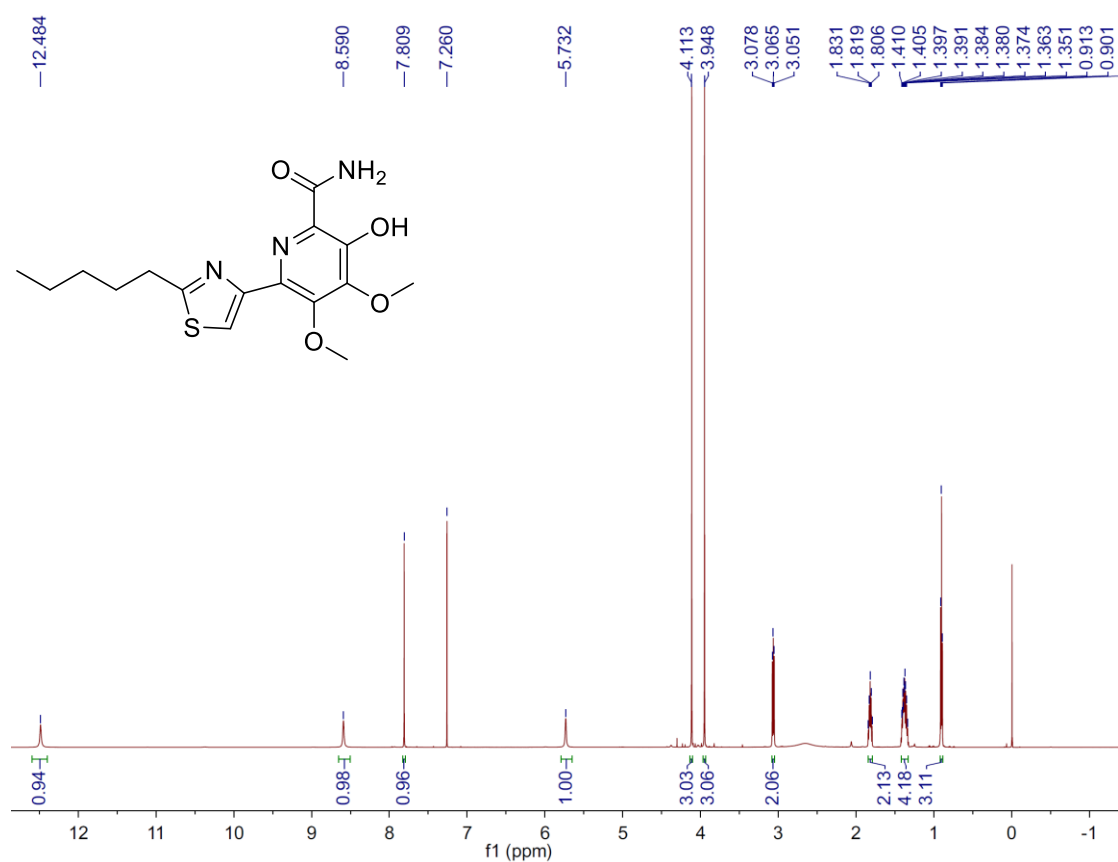

Supplementary Figure 8.  $^1\text{H}$  NMR (600 MHz) spectrum of compound 2 in  $\text{CDCl}_3$ .

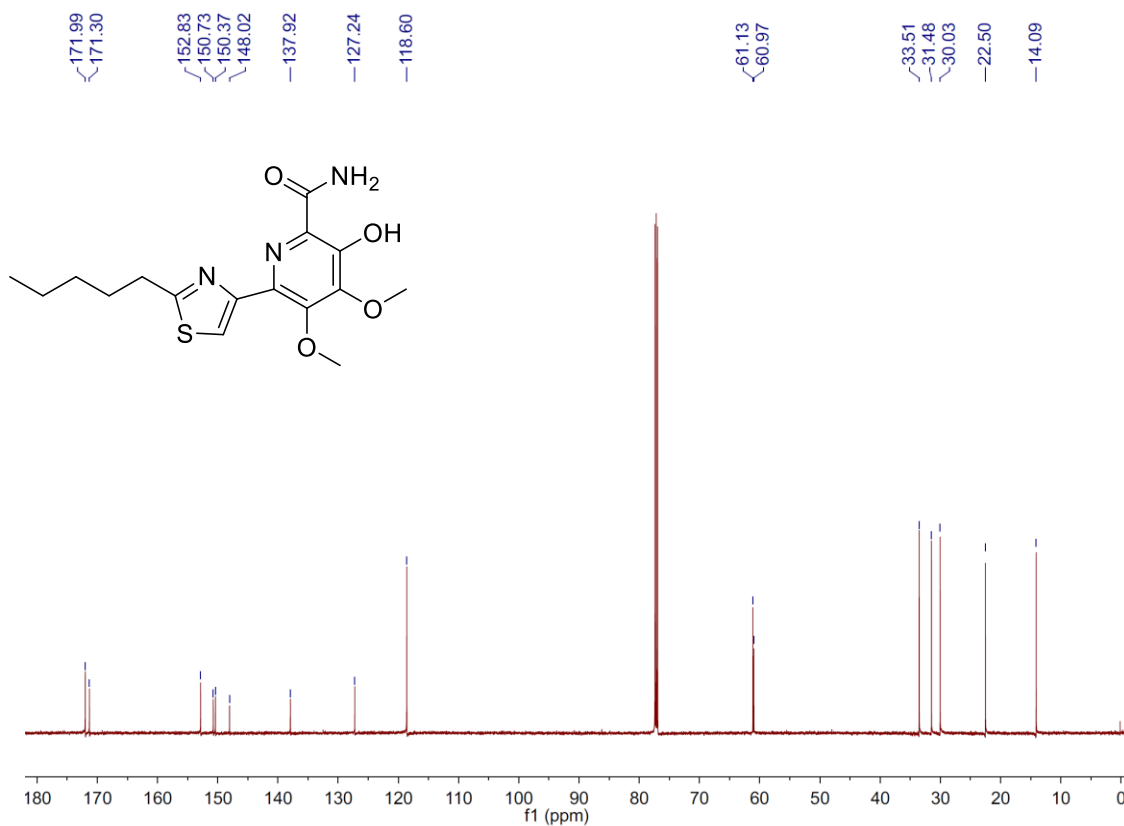

**Supplementary Figure 9.** <sup>13</sup>C NMR (150 MHz) spectrum of compound 2 in CDCl<sub>3</sub>.

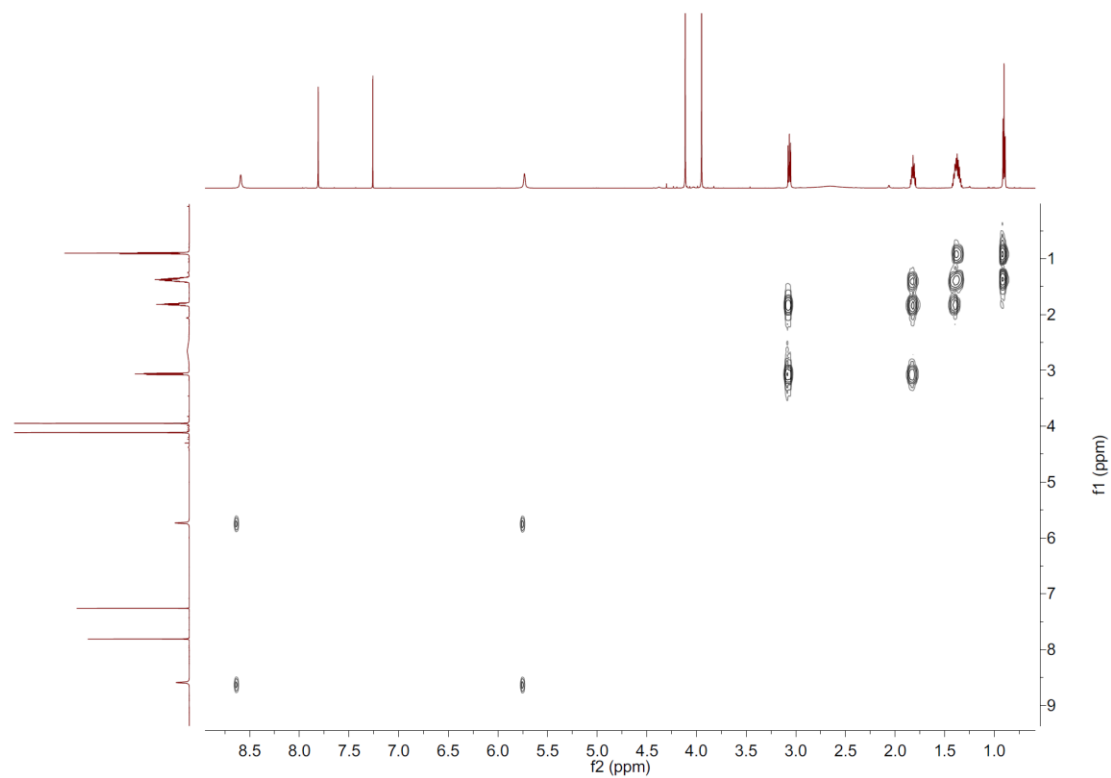

**Supplementary Figure 10.** <sup>1</sup>H-<sup>1</sup>H COSY (600 MHz) spectrum of compound 2 in CDCl<sub>3</sub>.

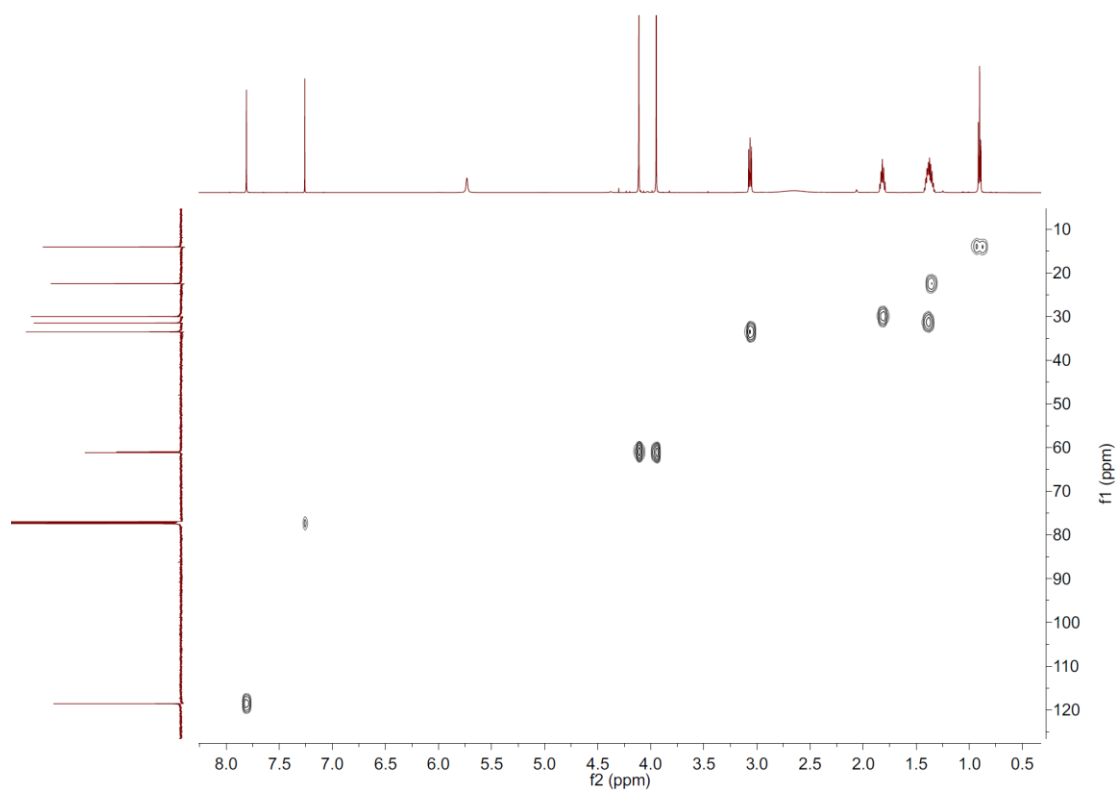

**Supplementary Figure 11.** HSQC (600 MHz) spectrum of compound **2** in CDCl<sub>3</sub>.

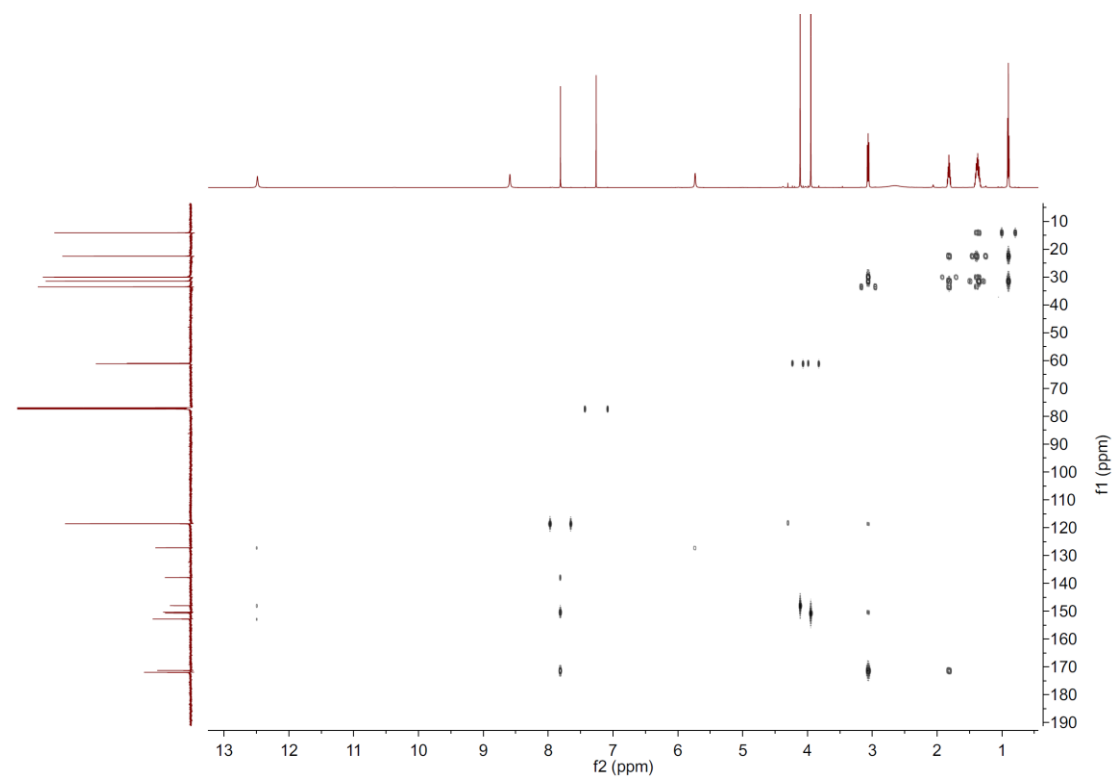

**Supplementary Figure 12.** HMBC (600 MHz) spectrum of compound **2** in CDCl<sub>3</sub>.

## User Spectra

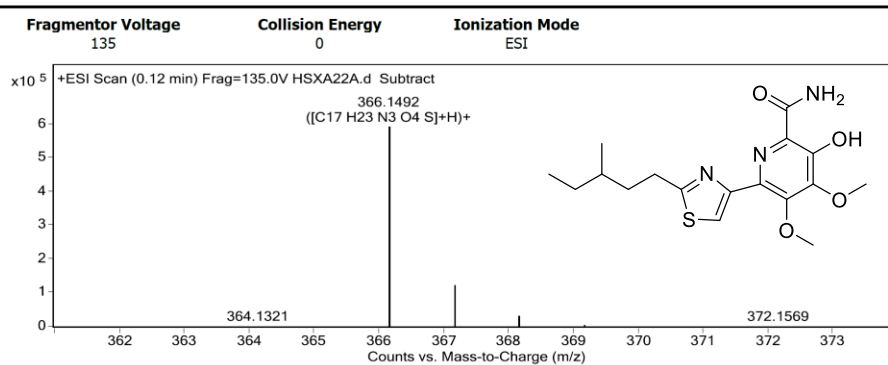

Supplementary Figure 13. HRESIMS spectrum of compound 3.

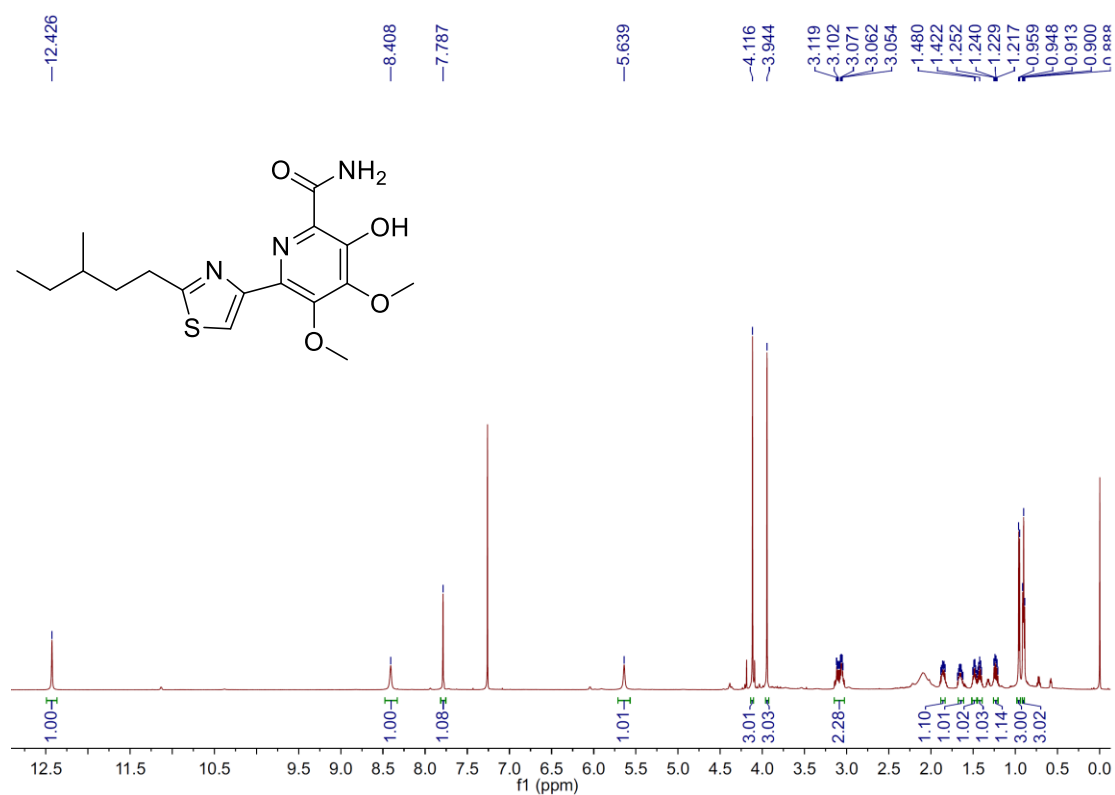

Supplementary Figure 14. <sup>1</sup>H-NMR (600 MHz) spectrum of compound 3 in CDCl<sub>3</sub>.

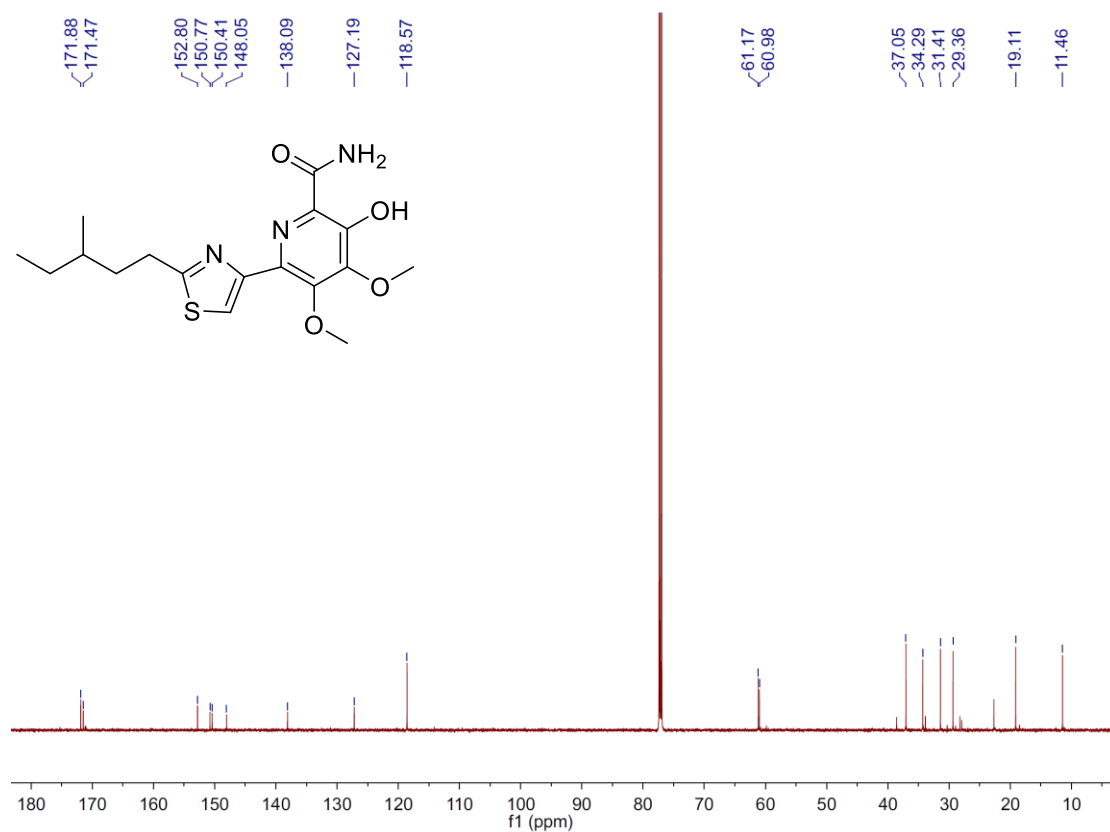

**Supplementary Figure 15.** <sup>13</sup>C-NMR (150 MHz) spectrum of compound 3 in CDCl<sub>3</sub>.

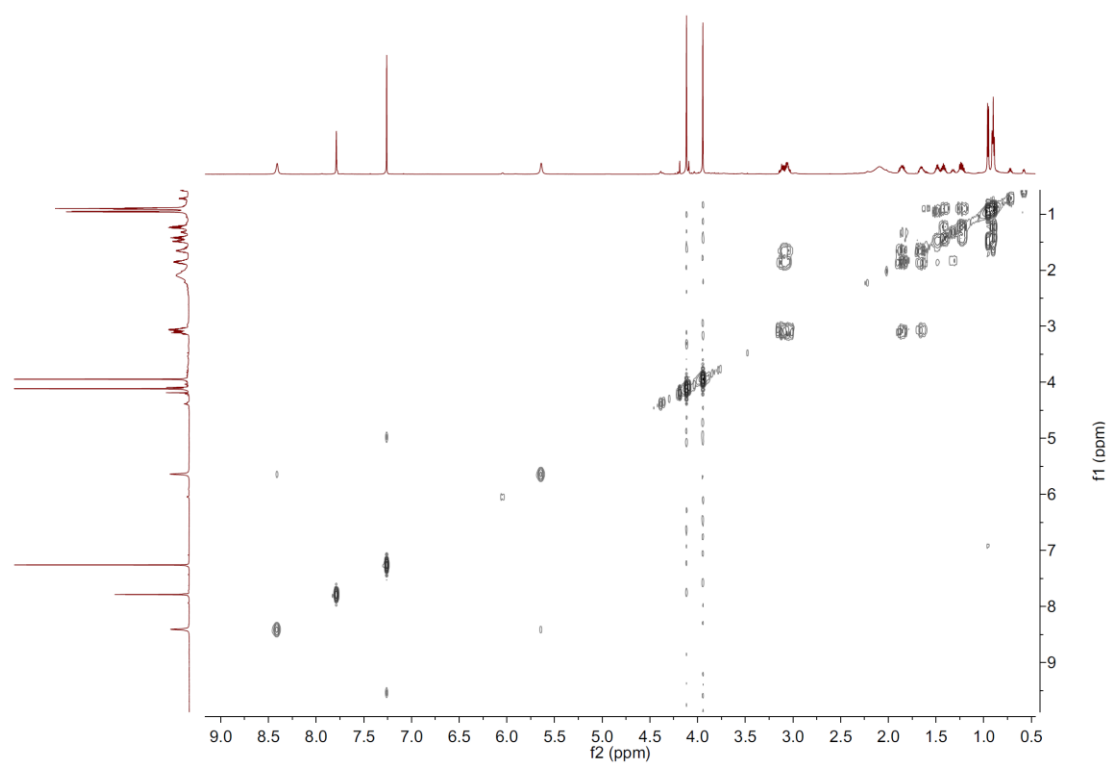

**Supplementary Figure 16.** <sup>1</sup>H-<sup>1</sup>H COSY (600 MHz) spectrum of compound 3 in CDCl<sub>3</sub>.

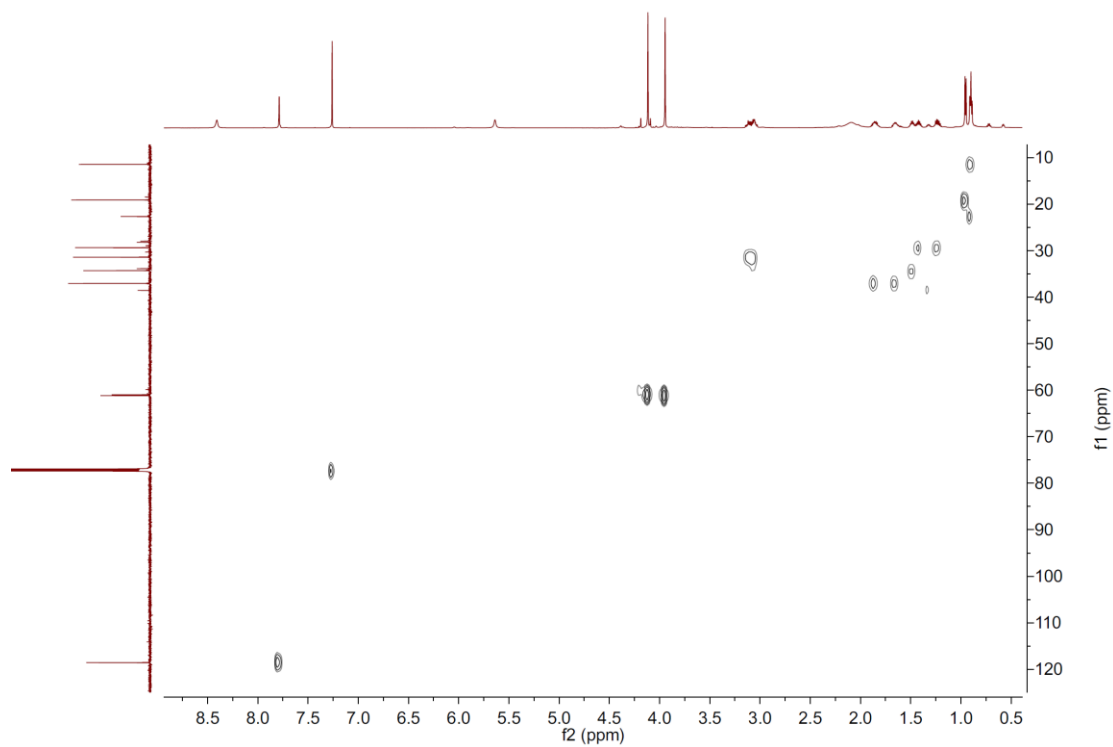

**Supplementary Figure 17.** HSQC (600 MHz) spectrum of compound **3** in  $\text{CDCl}_3$ .

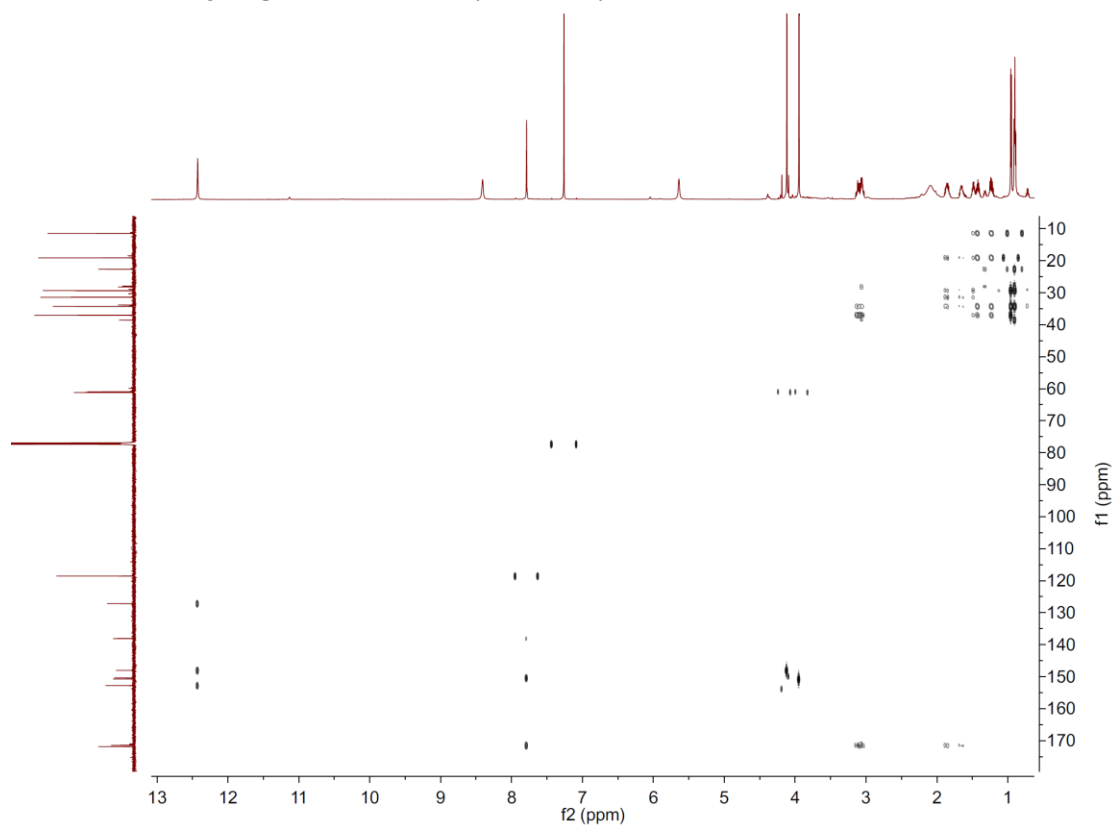

**Supplementary Figure 18.** HMBC (600 MHz) spectrum of compound **3** in  $\text{CDCl}_3$ .

## User Spectra

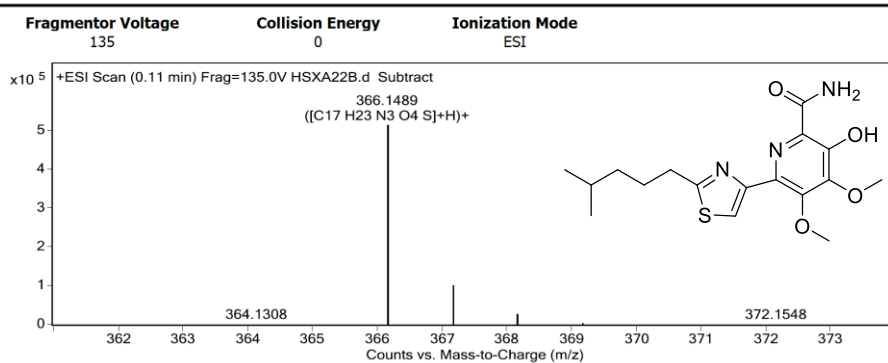

Supplementary Figure 19. HRESIMS spectrum of compound 4.

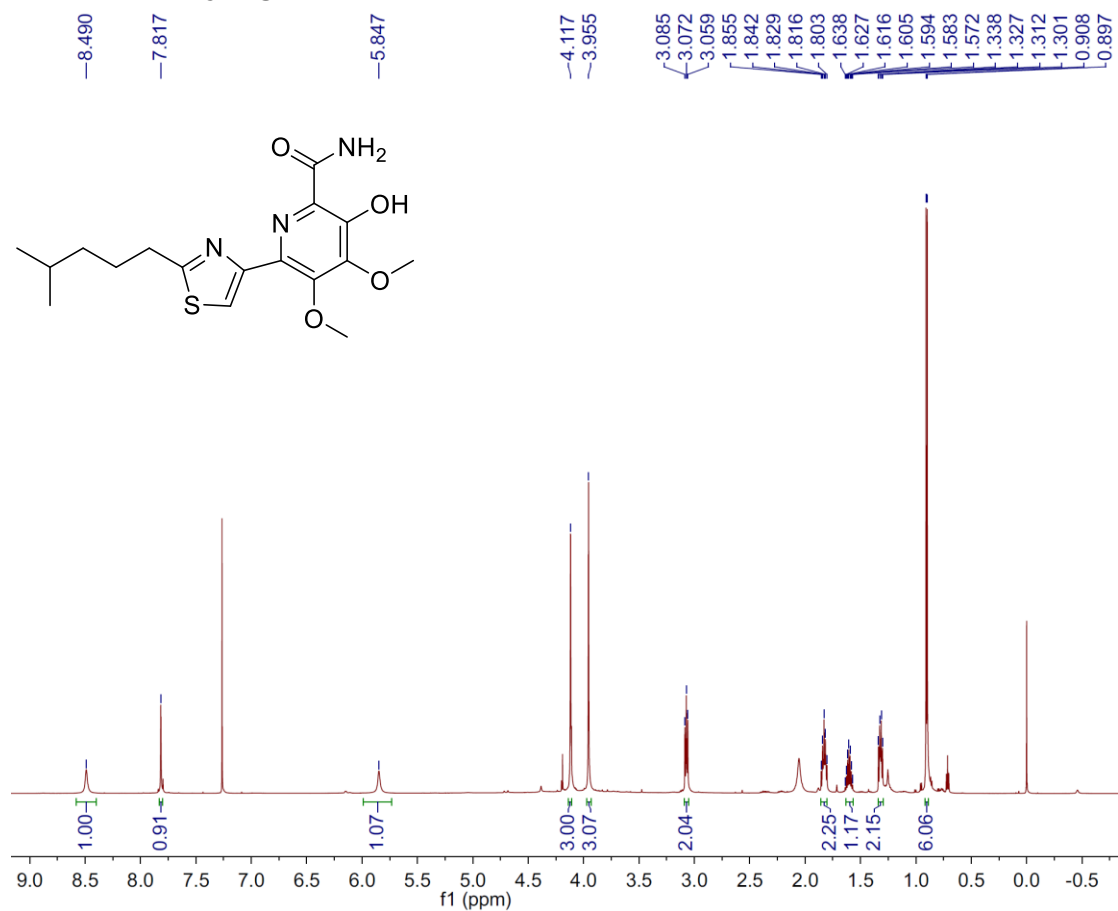

Supplementary Figure 20. <sup>1</sup>H-NMR (600 MHz) spectrum of compound 4 in CDCl<sub>3</sub>.



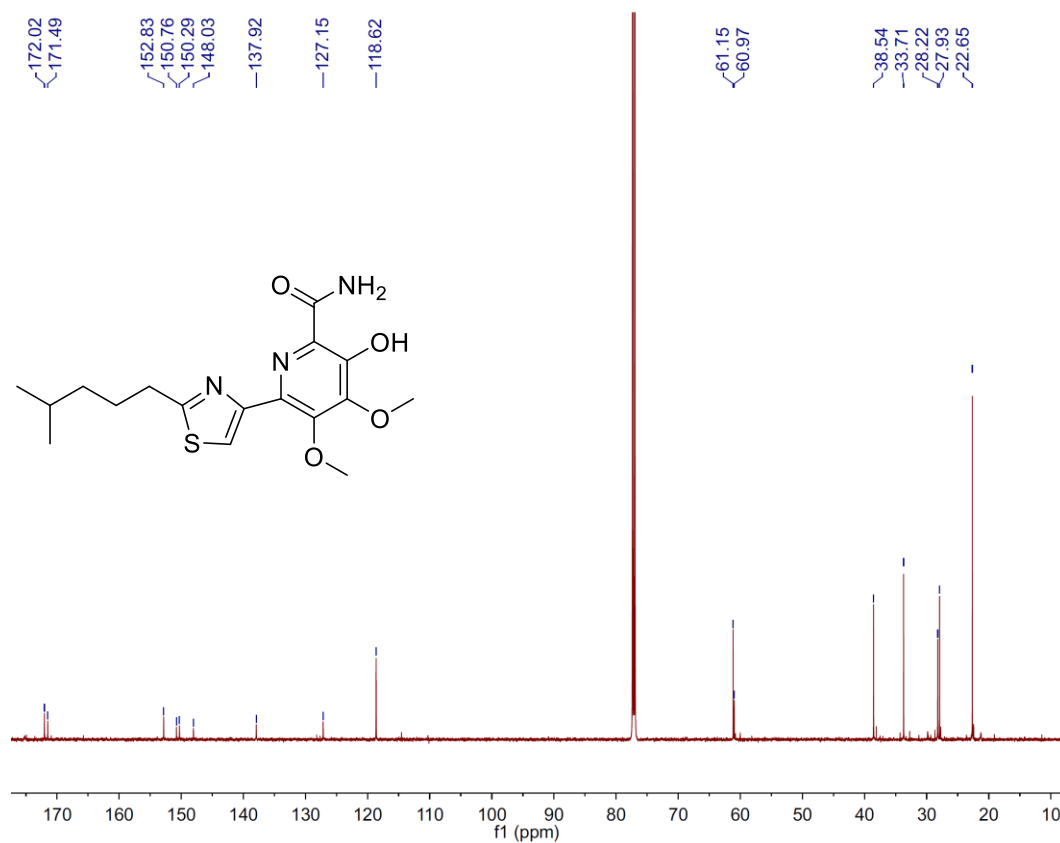

**Supplementary Figure 21.** <sup>13</sup>C-NMR (150 MHz) spectrum of compound 4 in CDCl<sub>3</sub>.

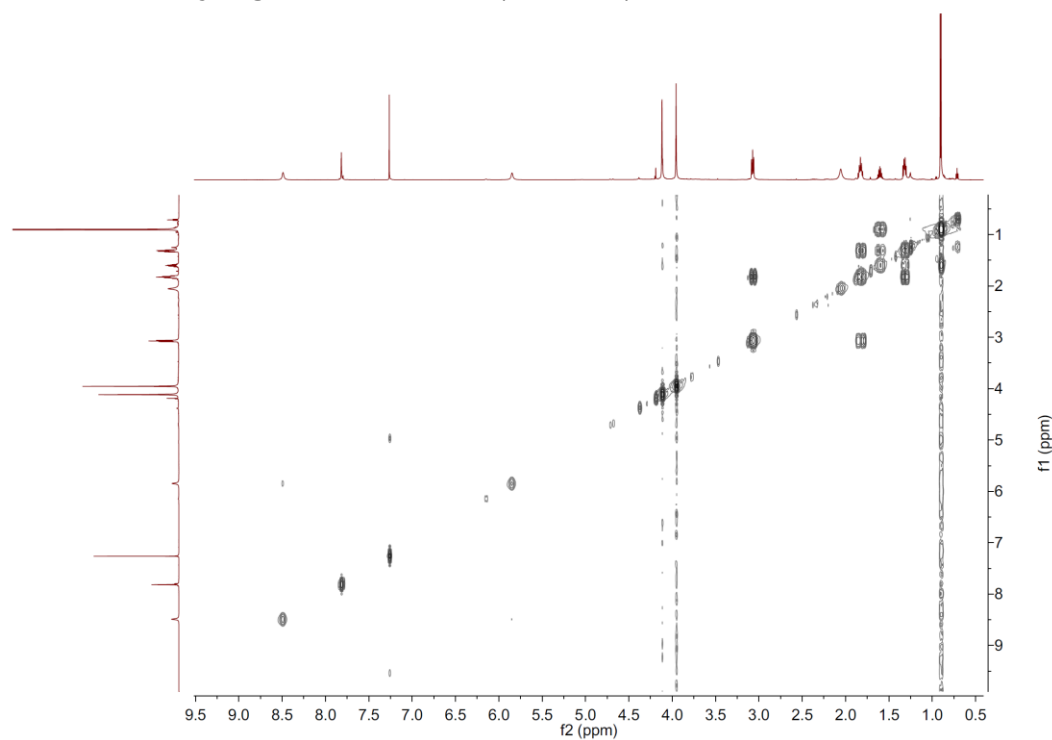

**Supplementary Figure 22.** <sup>1</sup>H-<sup>1</sup>H COSY (600 MHz) spectrum of compound 4 in CDCl<sub>3</sub>.

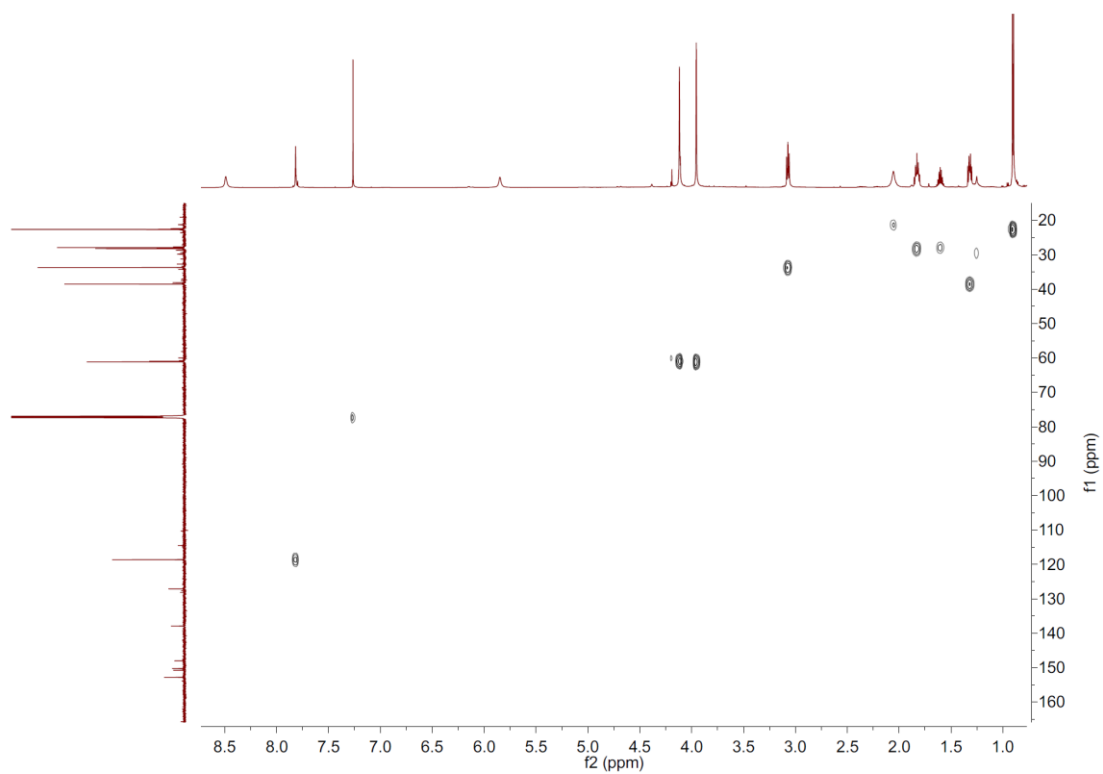

**Supplementary Figure 23.** HSQC (600 MHz) spectrum of compound **4** in  $\text{CDCl}_3$ .

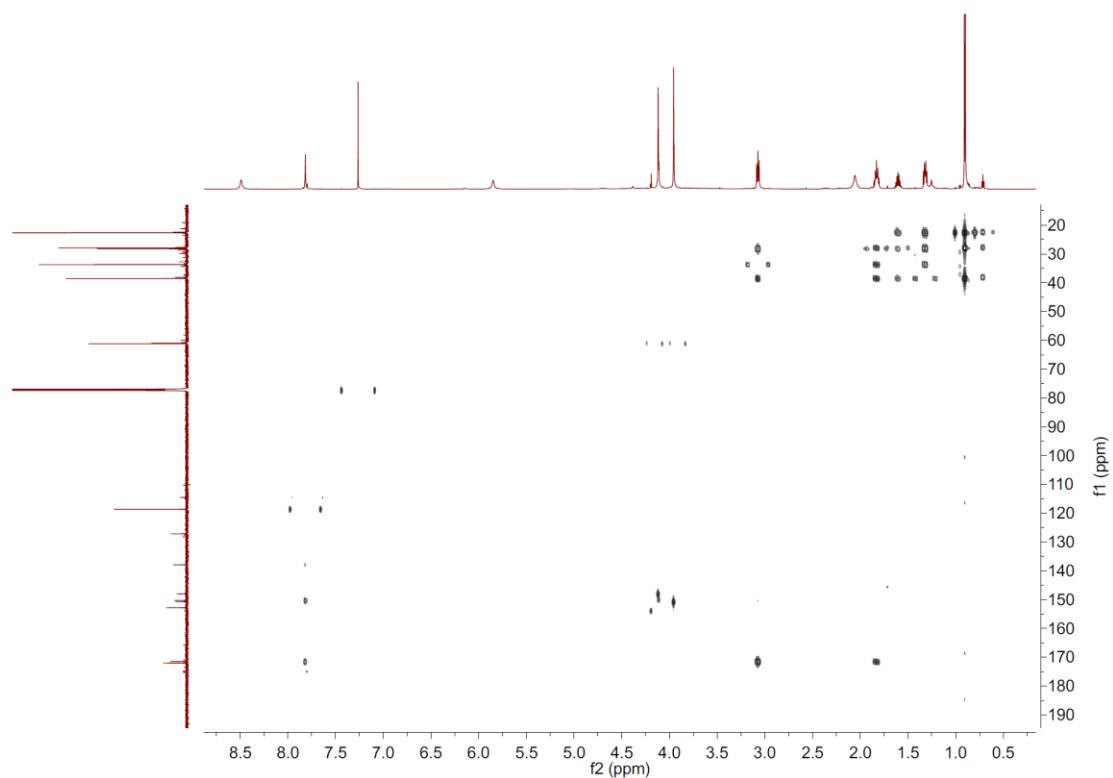

**Supplementary Figure 24.** HMBC (600 MHz) spectrum of compound **4** in  $\text{CDCl}_3$ .

## User Spectra

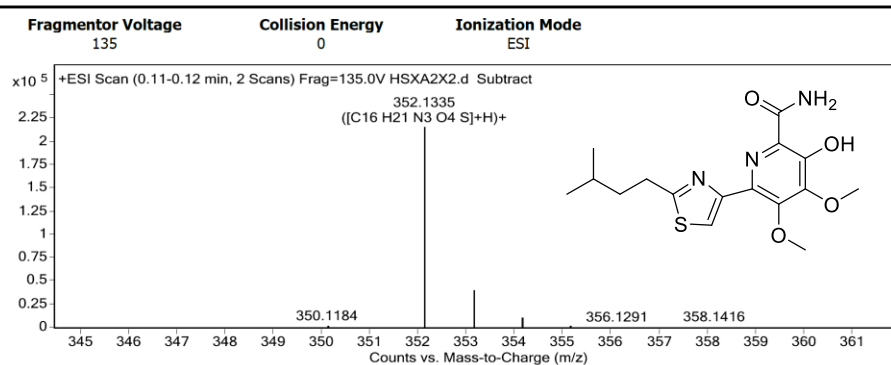

Supplementary Figure 25. HRESIMS spectrum of compound **5**.

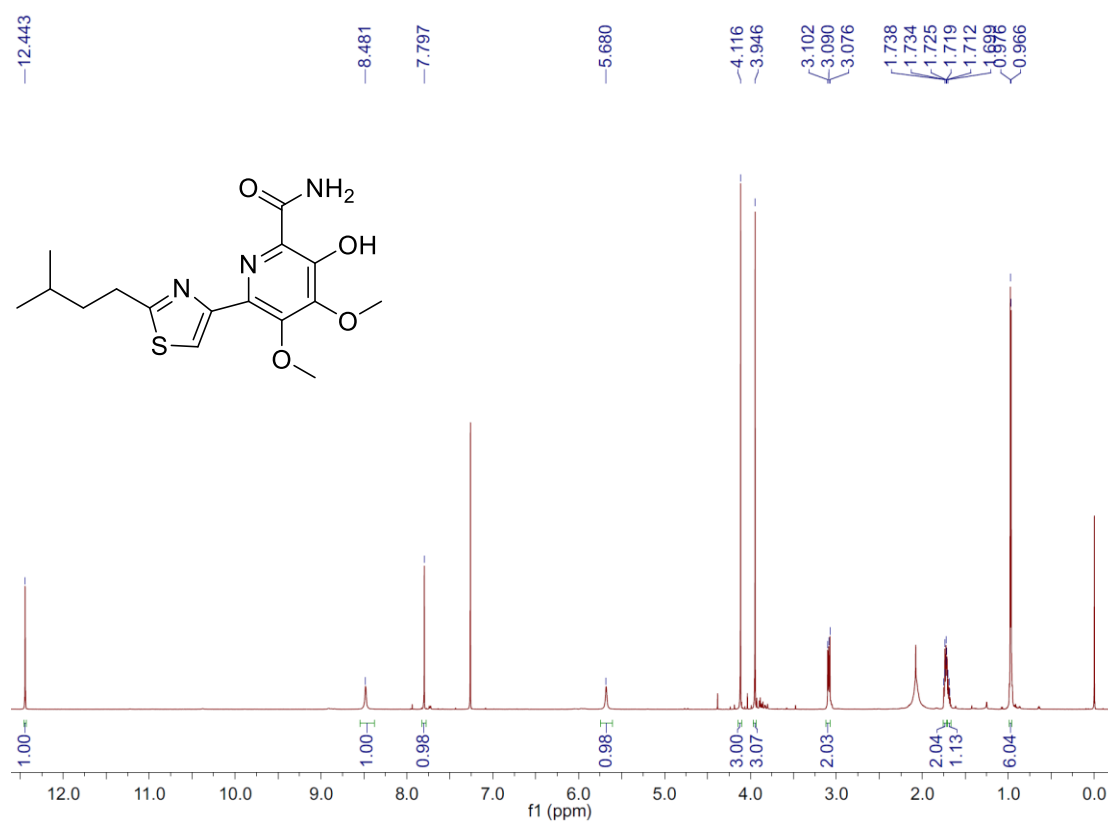

Supplementary Figure 26.  $^1\text{H-NMR}$  (600 MHz) spectrum of compound **5** in  $\text{CDCl}_3$ .

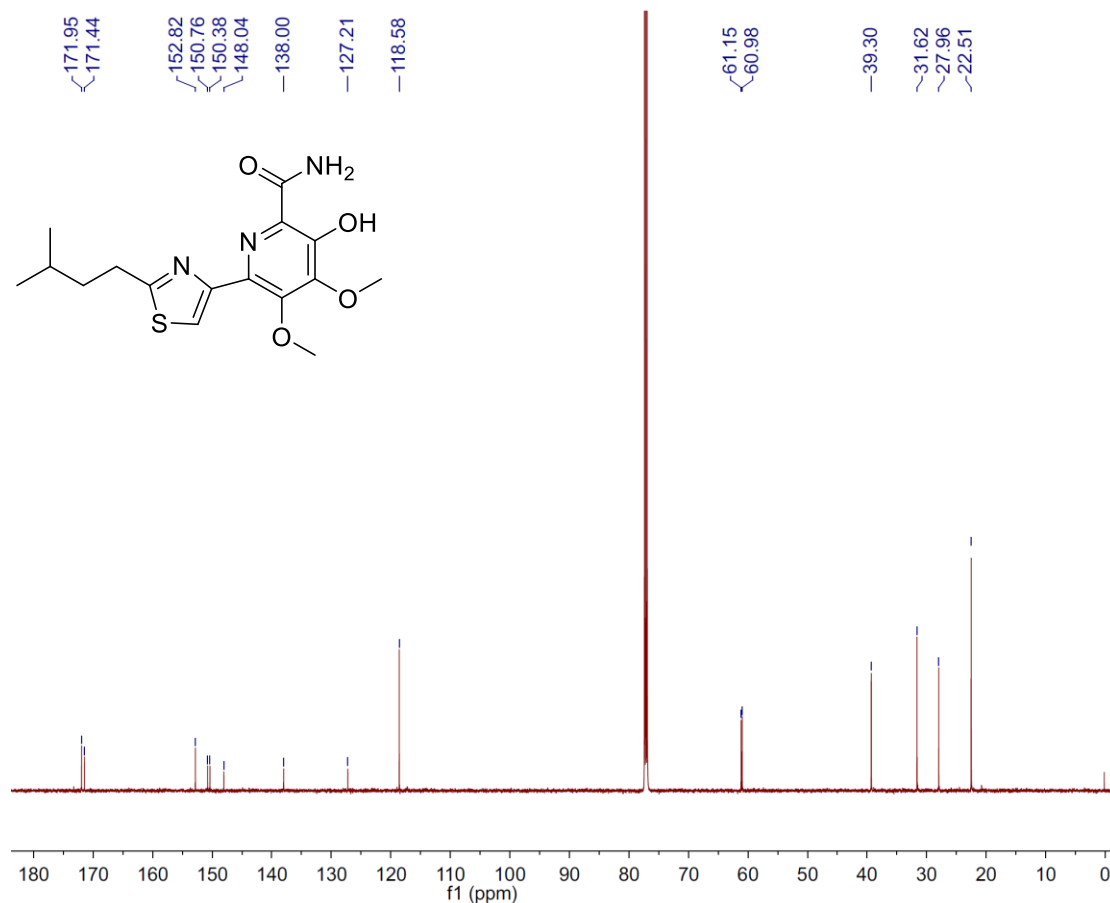

**Supplementary Figure 27.**  $^{13}\text{C-NMR}$  (150 MHz) spectrum of compound 5 in  $\text{CDCl}_3$ .

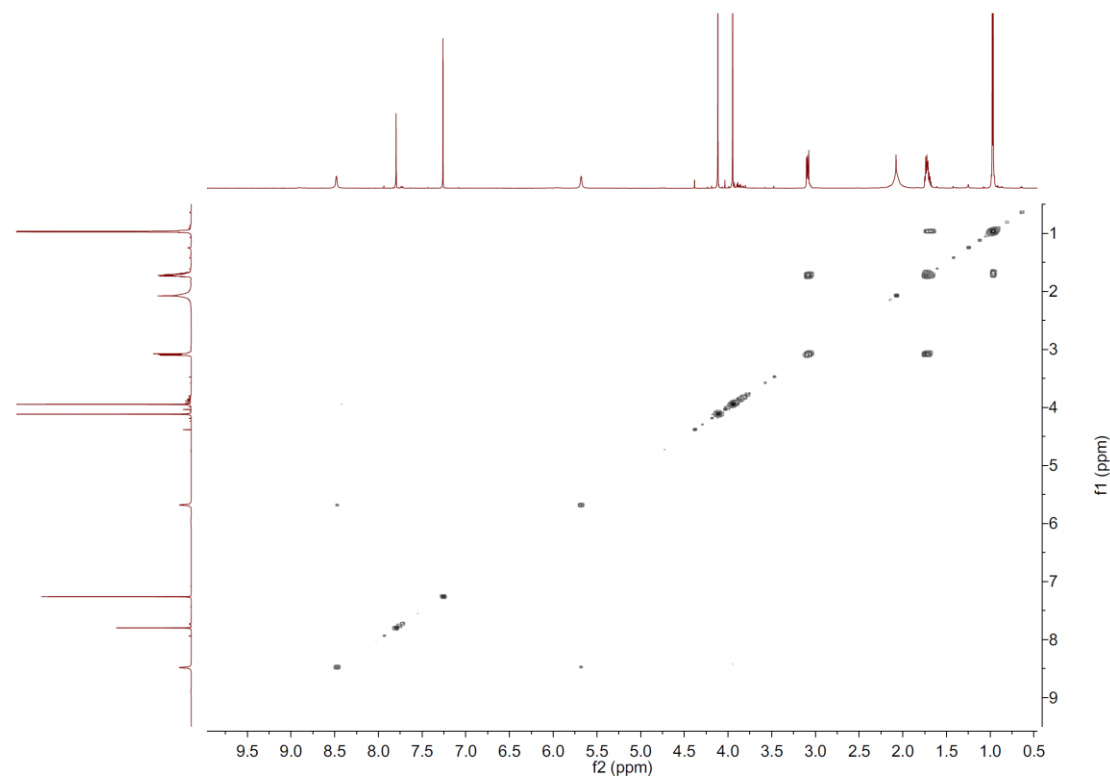

**Supplementary Figure 28.**  $^1\text{H-}^1\text{H}$  COSY (600 MHz) spectrum of compound 5 in  $\text{CDCl}_3$ .

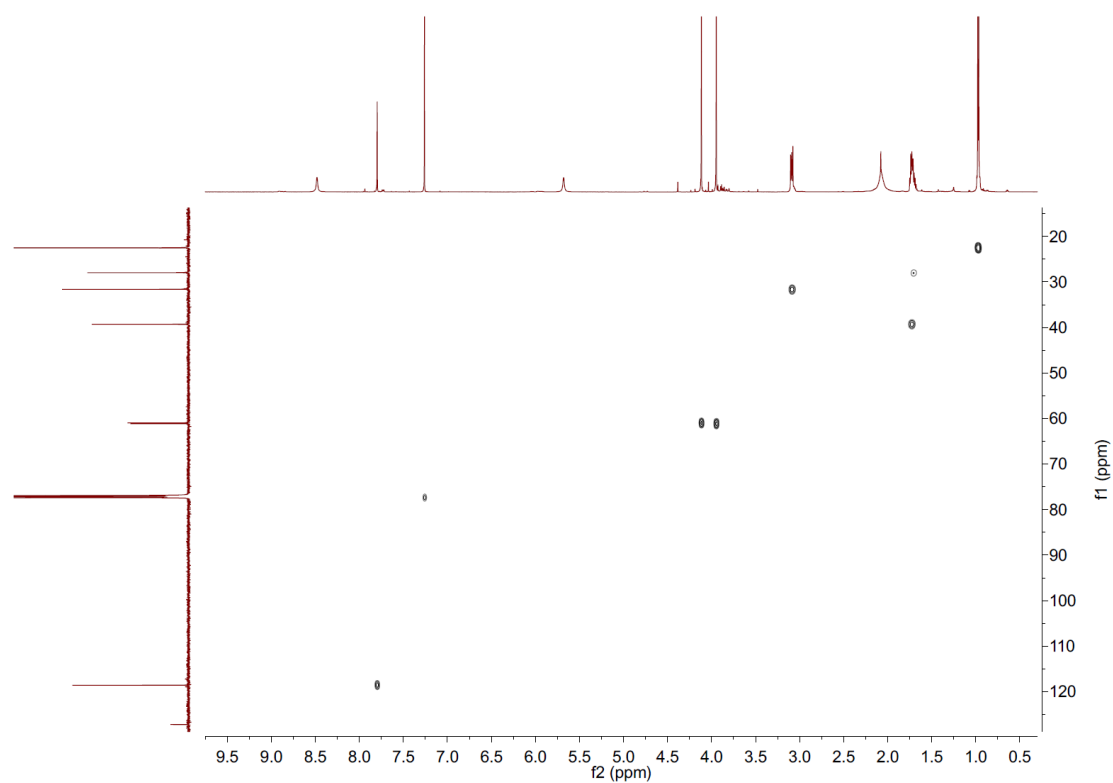

**Supplementary Figure 29.** HSQC (600 MHz) spectrum of compound **5** in  $\text{CDCl}_3$ .

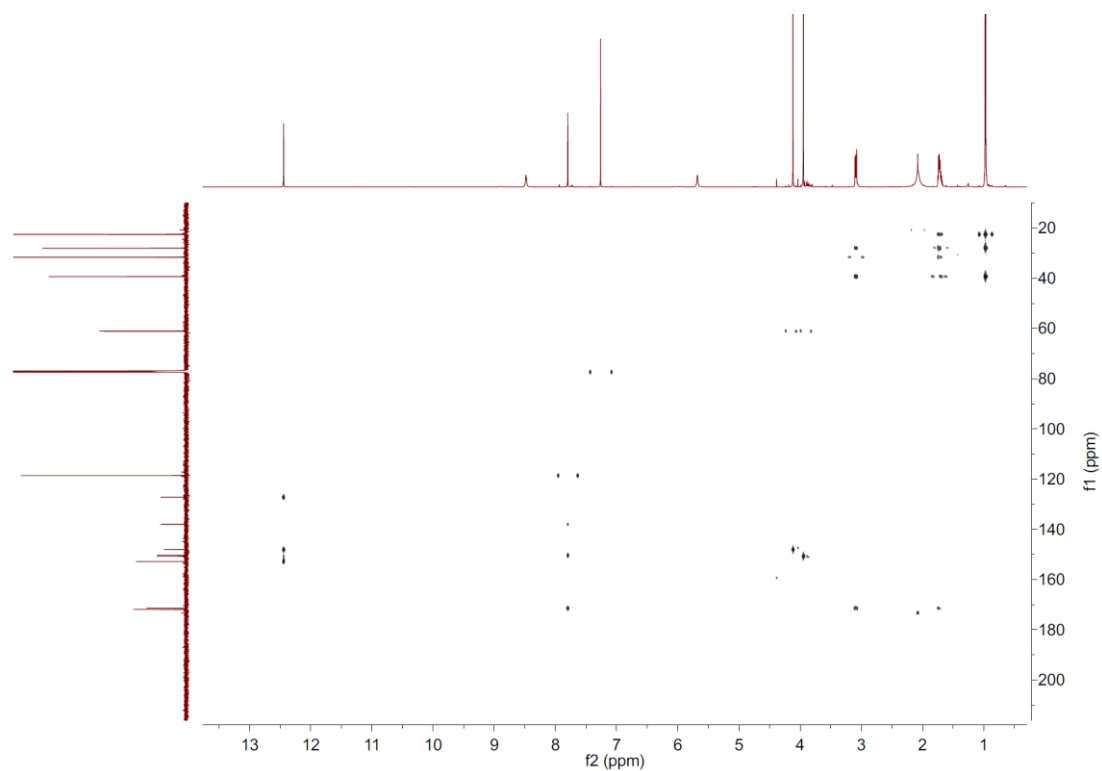

**Supplementary Figure 30.** HMBC (600 MHz) spectrum of compound **5** in  $\text{CDCl}_3$ .

## User Spectra

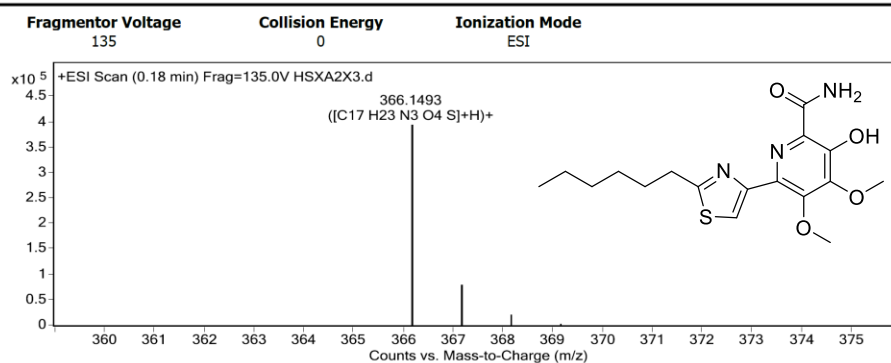

Supplementary Figure 31. HRESIMS spectrum of compound 6

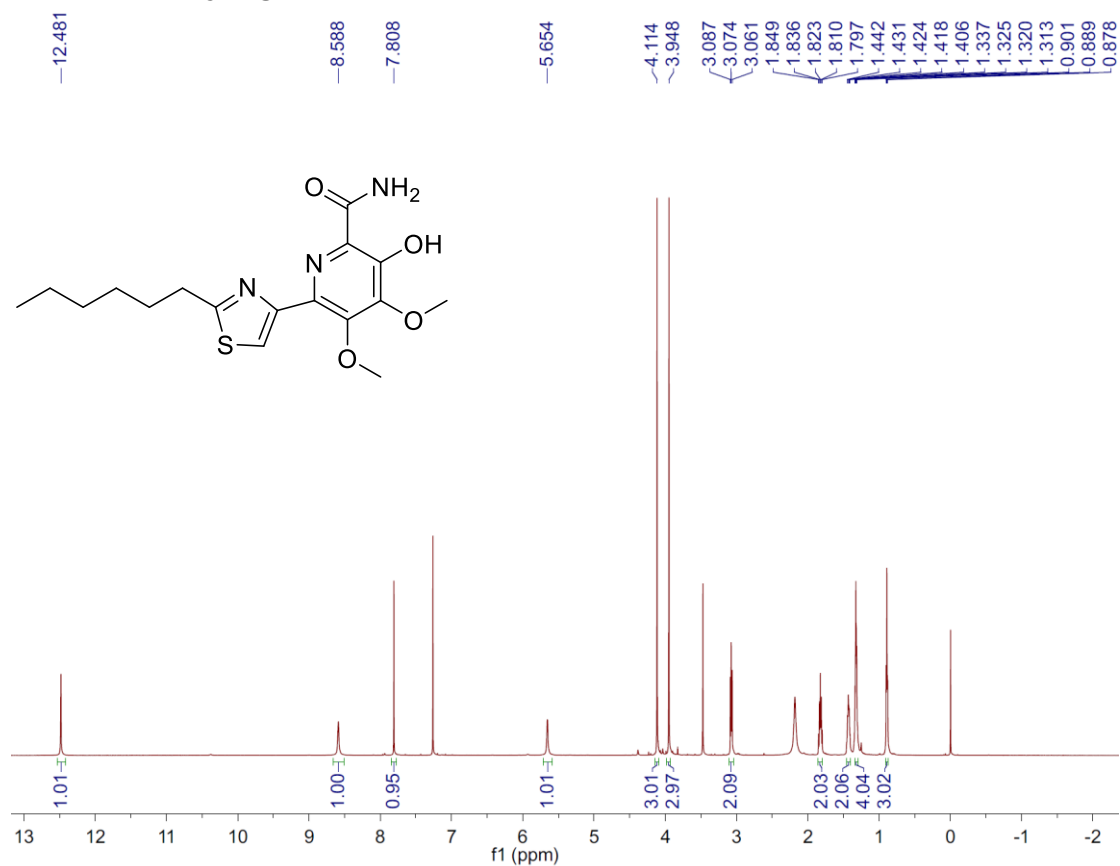

Supplementary Figure 32. <sup>1</sup>H-NMR (600 MHz) spectrum of compound 6 in CDCl<sub>3</sub>.

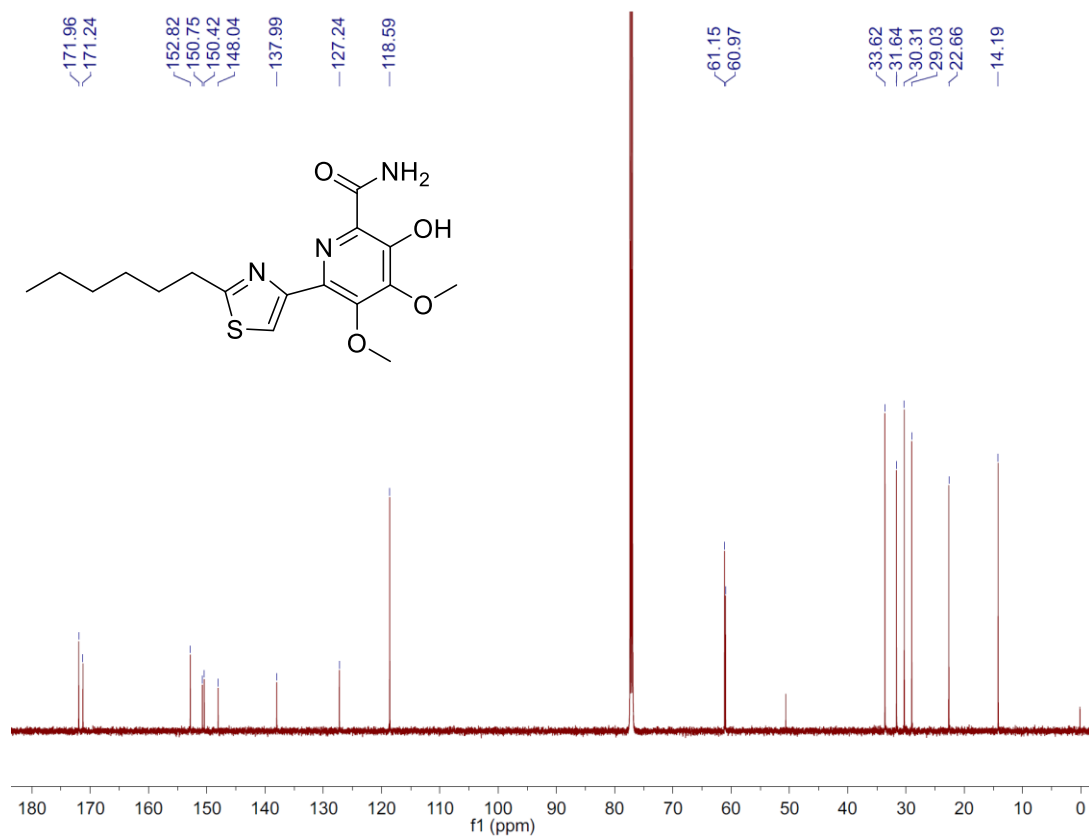

**Supplementary Figure 33.** <sup>13</sup>C-NMR (150 MHz) spectrum of compound 6 in CDCl<sub>3</sub>.

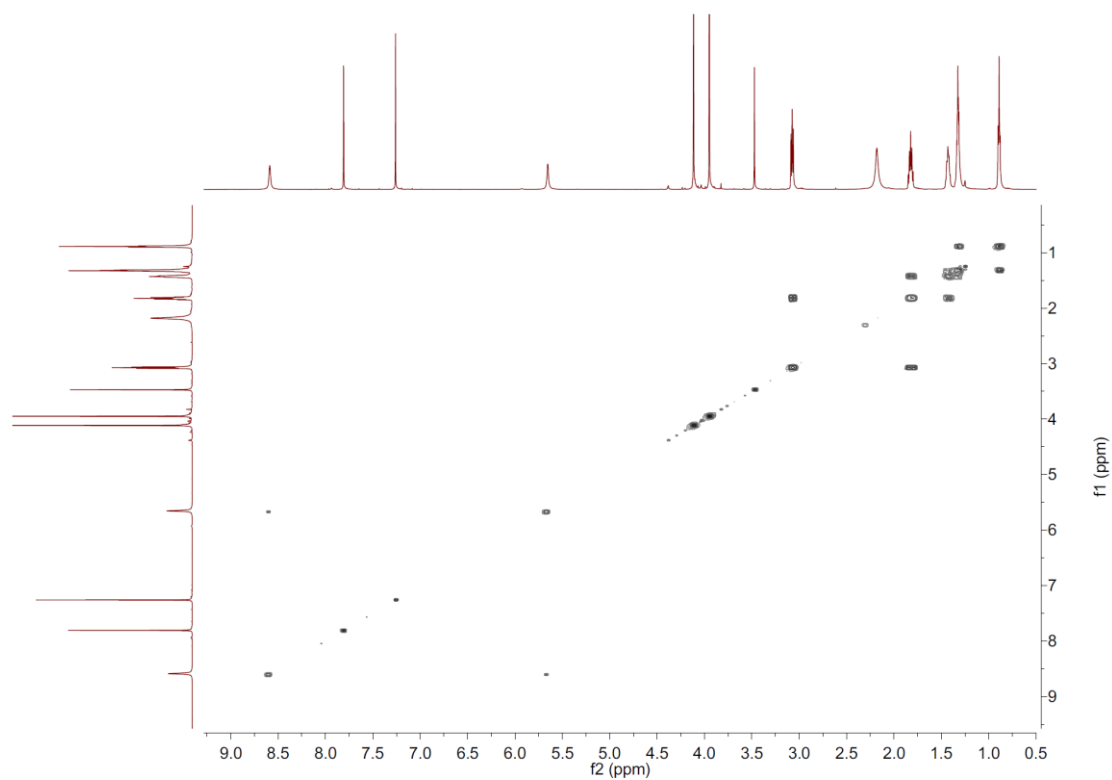

**Supplementary Figure 34.** <sup>1</sup>H-<sup>1</sup>H-COSY (600 MHz) spectrum of compound 6 in CDCl<sub>3</sub>.

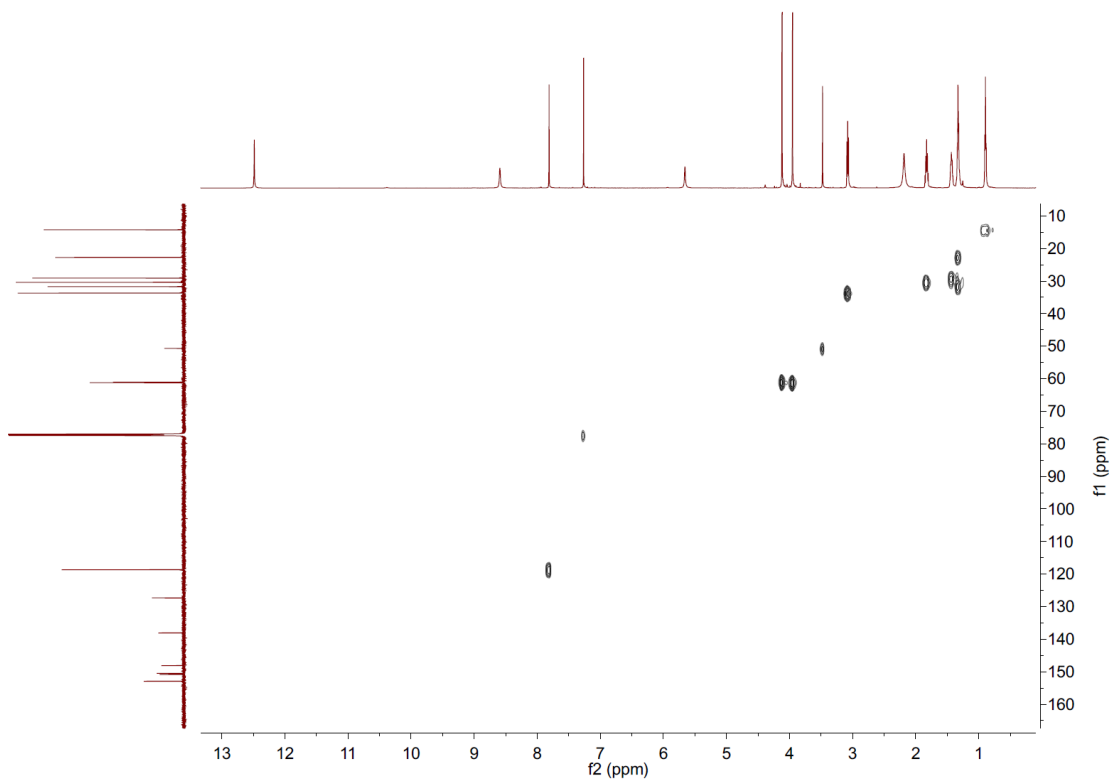

**Supplementary Figure 35.** HSQC (600 MHz) spectrum of compound **6** in  $\text{CDCl}_3$ .

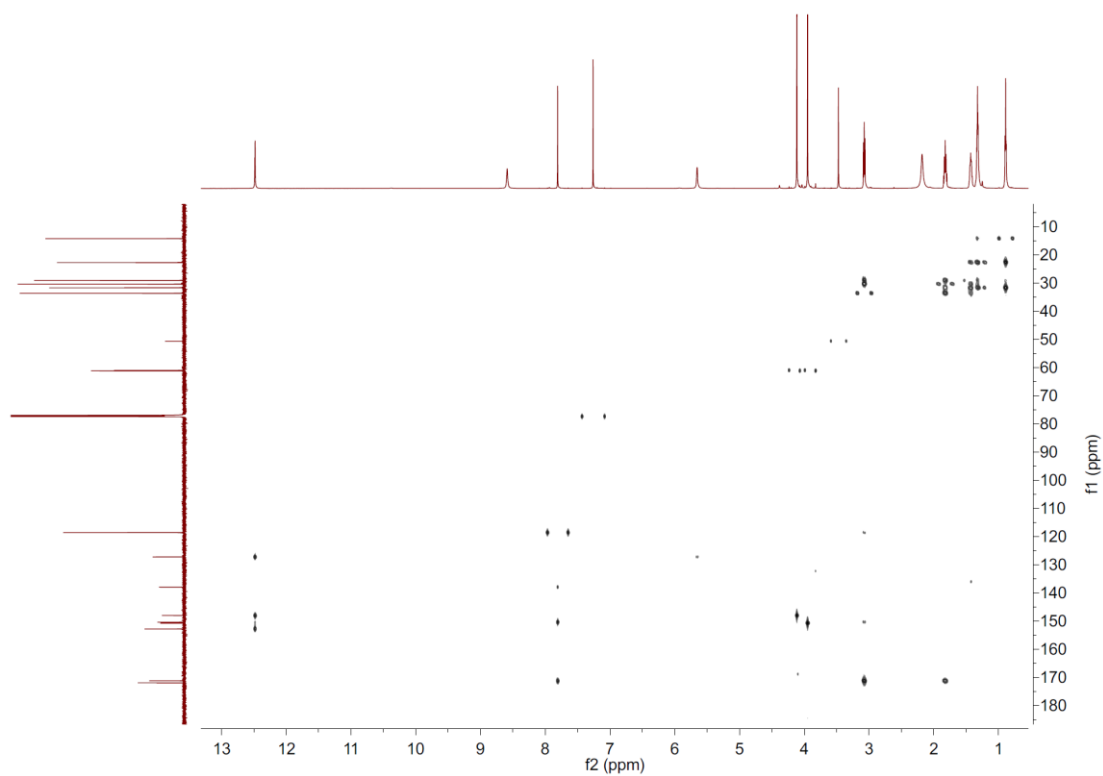

**Supplementary Figure 36.** HMBC (600 MHz) spectrum of compound **6** in  $\text{CDCl}_3$ .



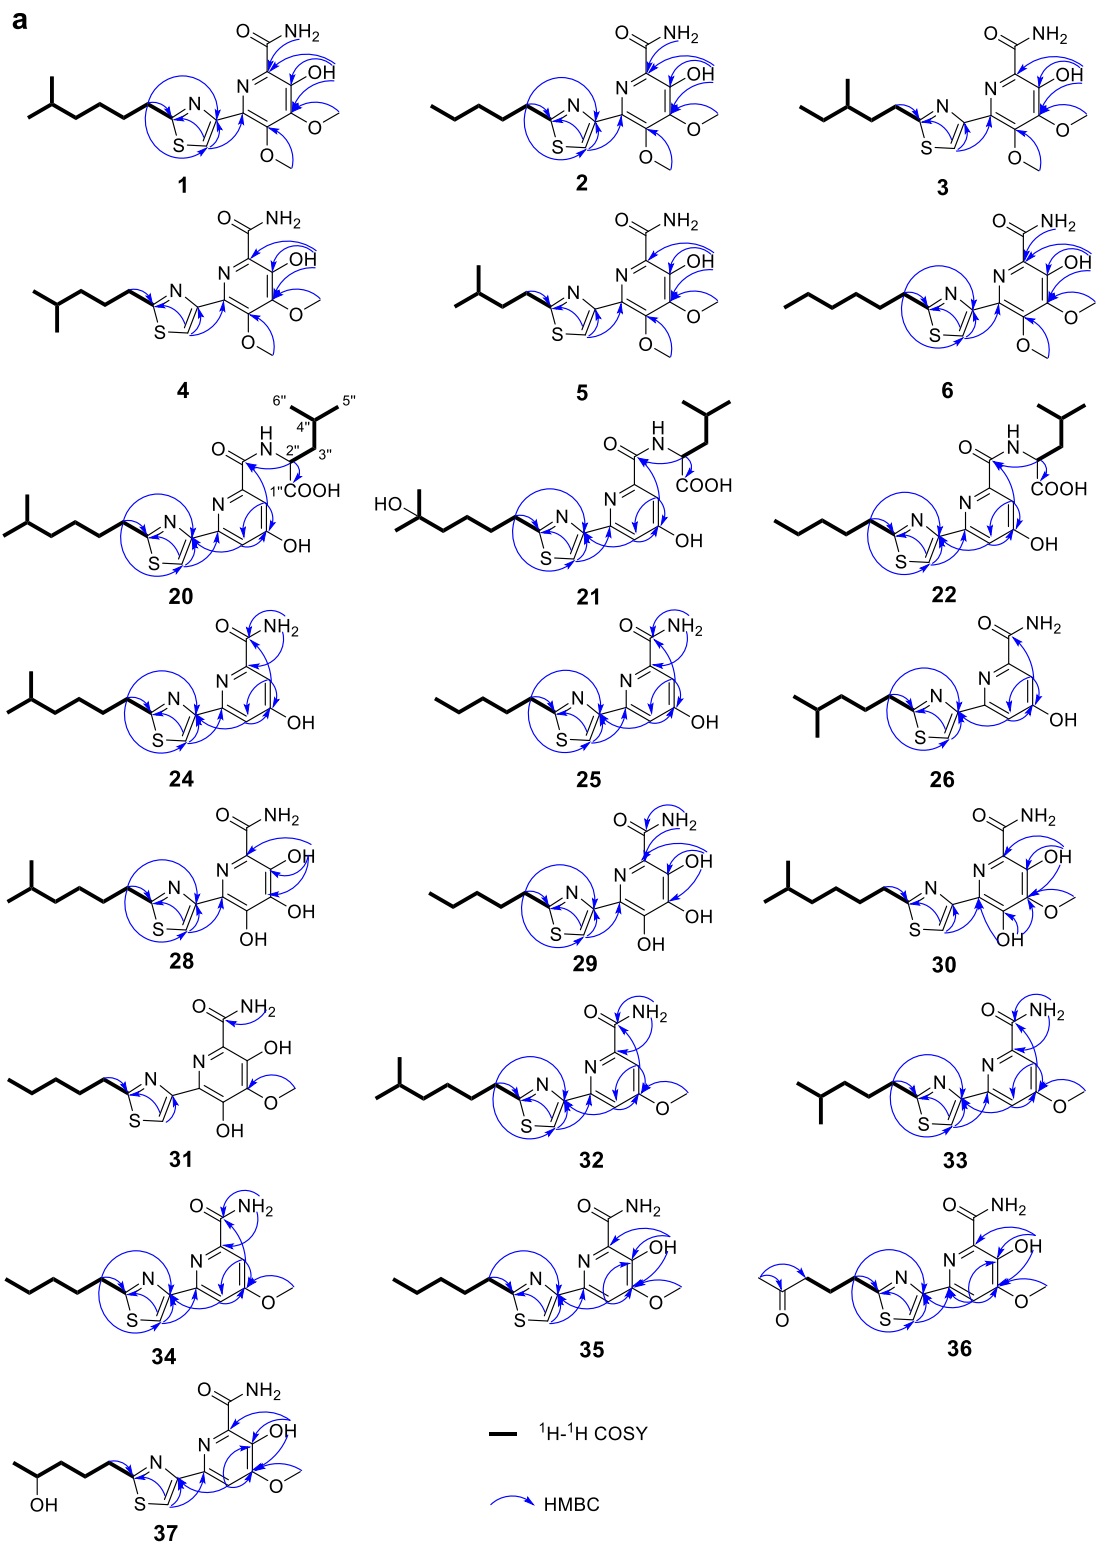

b

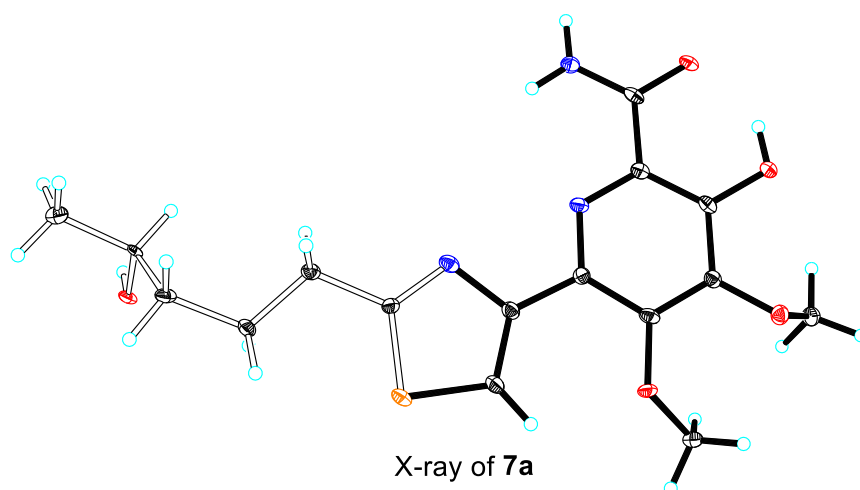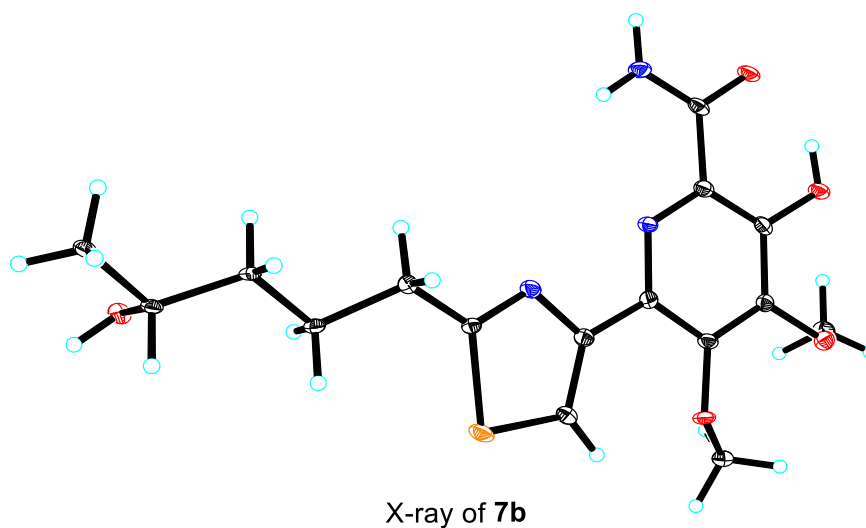

**Supplementary Figure 37.** 2D NMR correlations and ORTEP structures. (a) 2D NMR correlations of compounds **1-6**, **20-22**, **24-26** and **28-37**. (b) ORTEP representation (30% probability ellipsoids) of the X-ray structure of compound **7**.

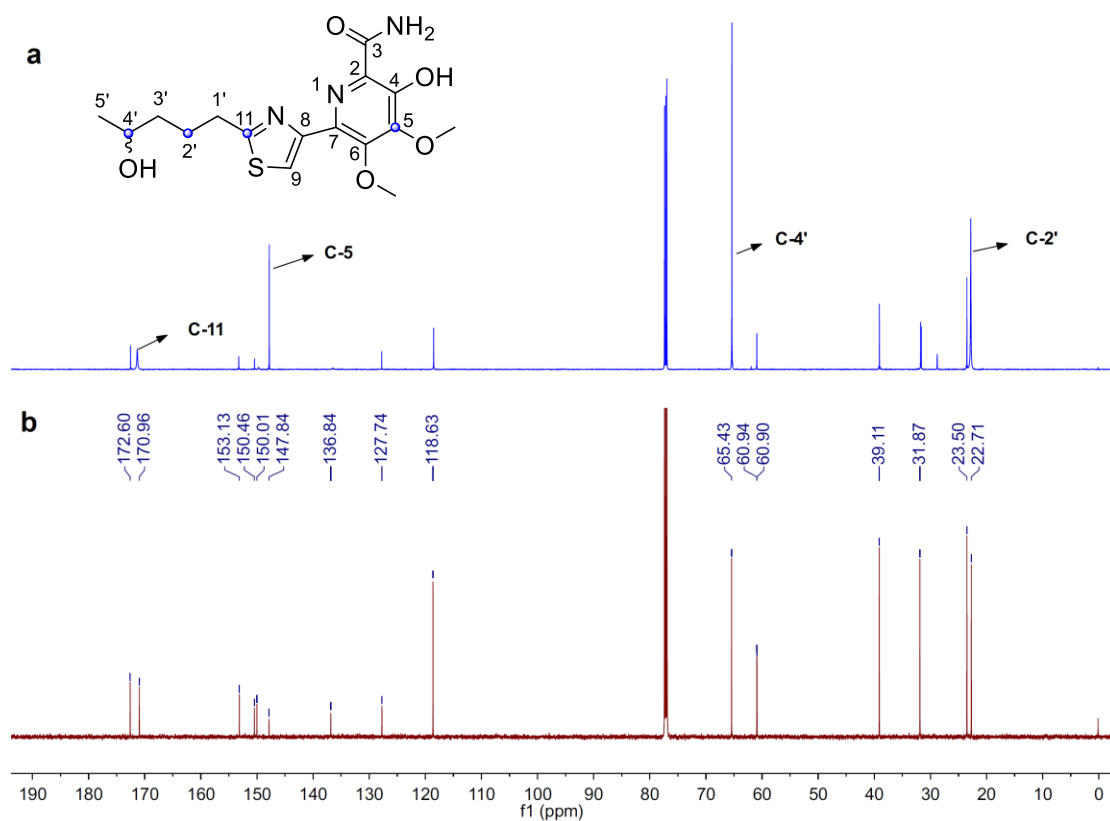

**Supplementary Figure 38.**  $^{13}\text{C}$  NMR (150 MHz) spectrum of **7** in  $\text{CDCl}_3$ . (a) **7** labeled with  $[1-^{13}\text{C}]$  acetate. (b) Natural abundance.

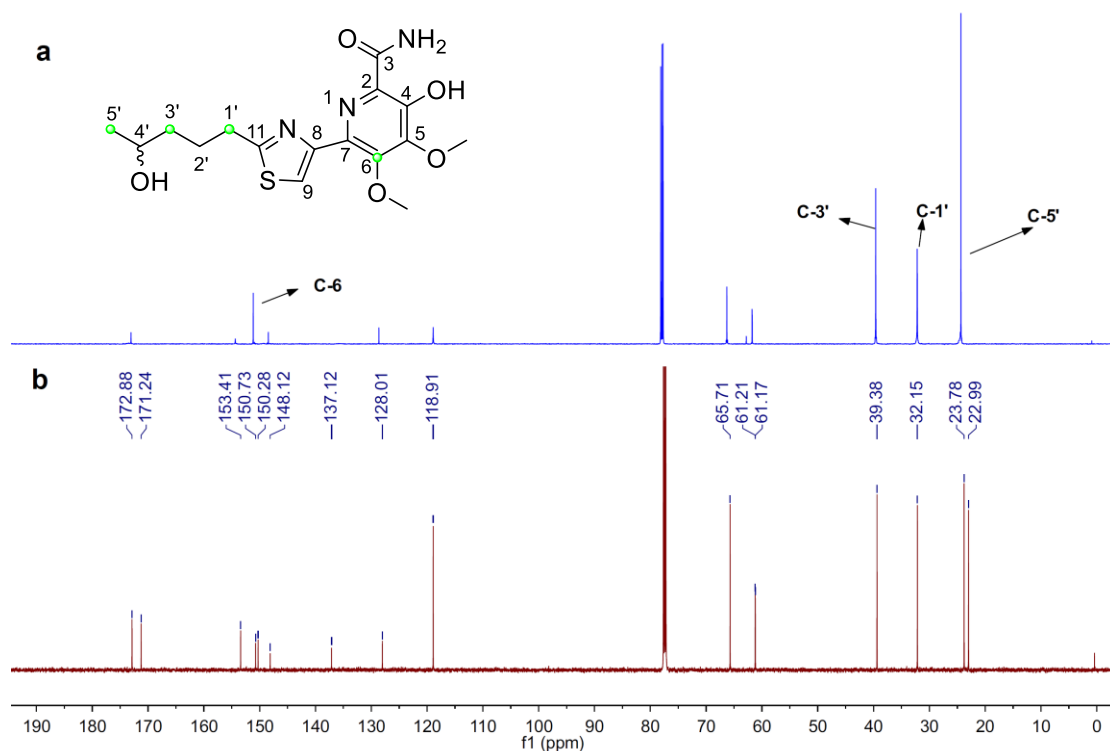

**Supplementary Figure 39.**  $^{13}\text{C}$  NMR (150 MHz) spectrum of **7** in  $\text{CDCl}_3$ . (a) **7** labeled with  $[2-^{13}\text{C}]$  acetate. (b) Natural abundance.

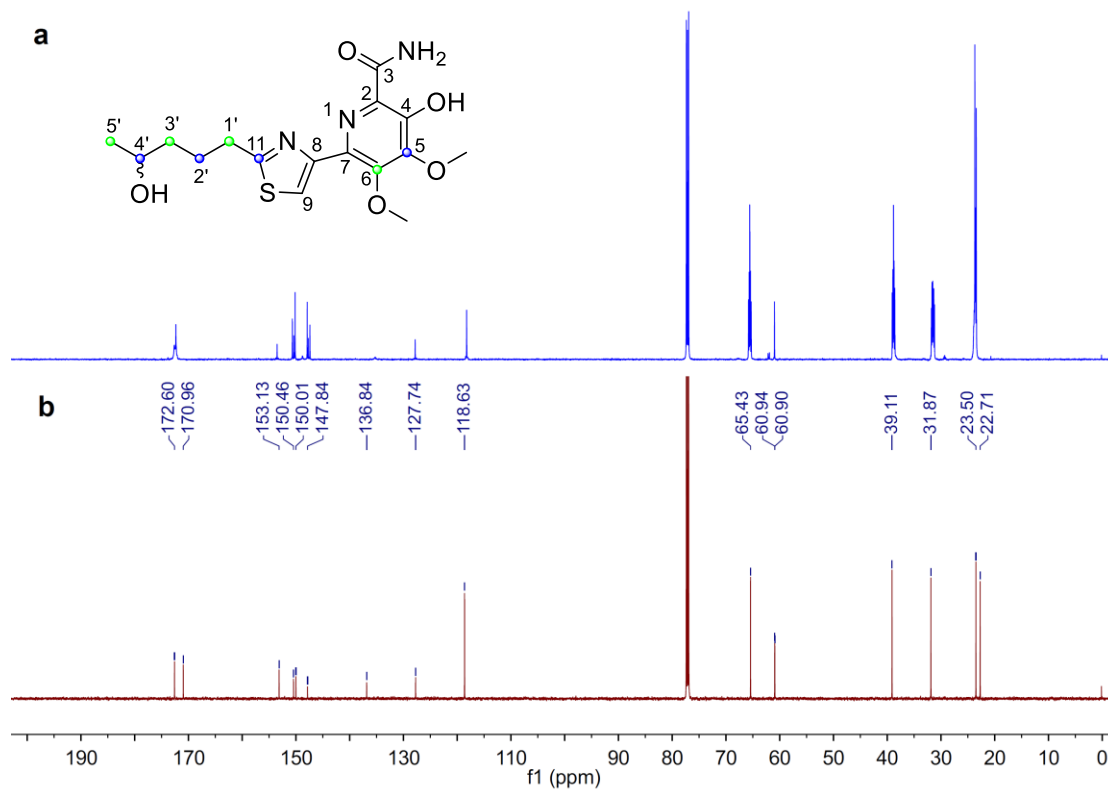

**Supplementary Figure 40.**  $^{13}\text{C}$  NMR (150 MHz) spectrum of **7** in  $\text{CDCl}_3$ . **(a)** **7** labeled with  $[1, 2\text{-}^{13}\text{C}_2]$  acetate. **(b)** Natural abundance.

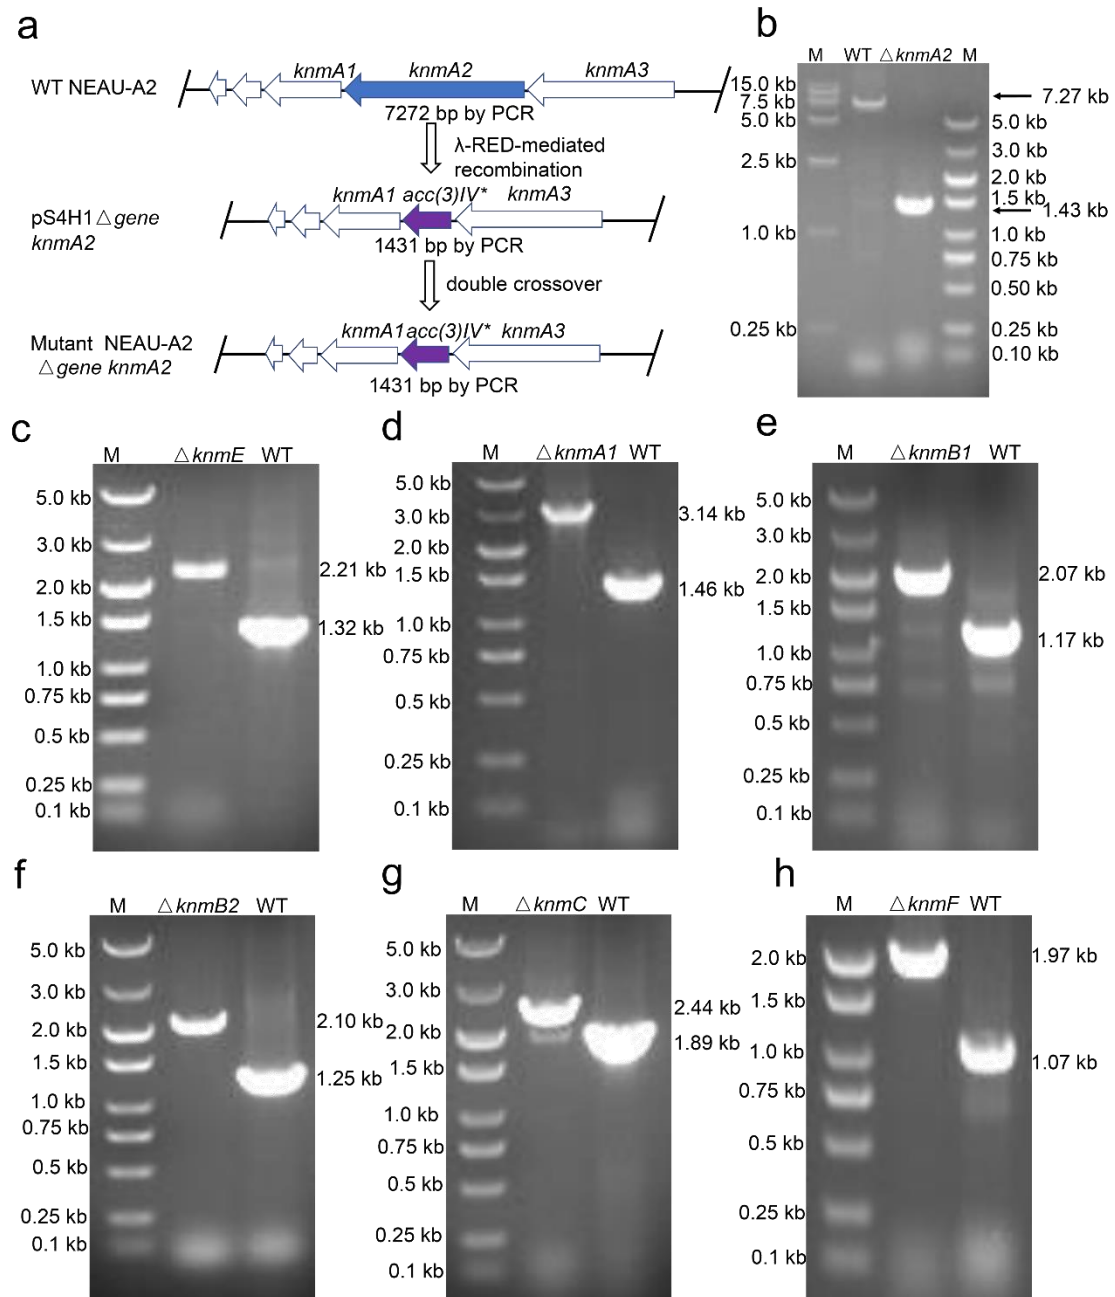

**Supplementary Figure 41.** Construction of in-frame deletion in *L. rhizosphaerae* NEAU-A2. **(a)** Gene replacement of *knm* using the PCR-targeting method. **(b-h)** PCR verification of *knm* mutants by PCR using the primers listed in supplementary Table 22. Lane M: DNA molecular ladder; Lane  $\Delta$ *knm*, PCR product from NEAU-A2 mutants; Lane WT, PCR product from the strain NEAU-A2. A representative result of  $n = 2$  independent experiments is shown.

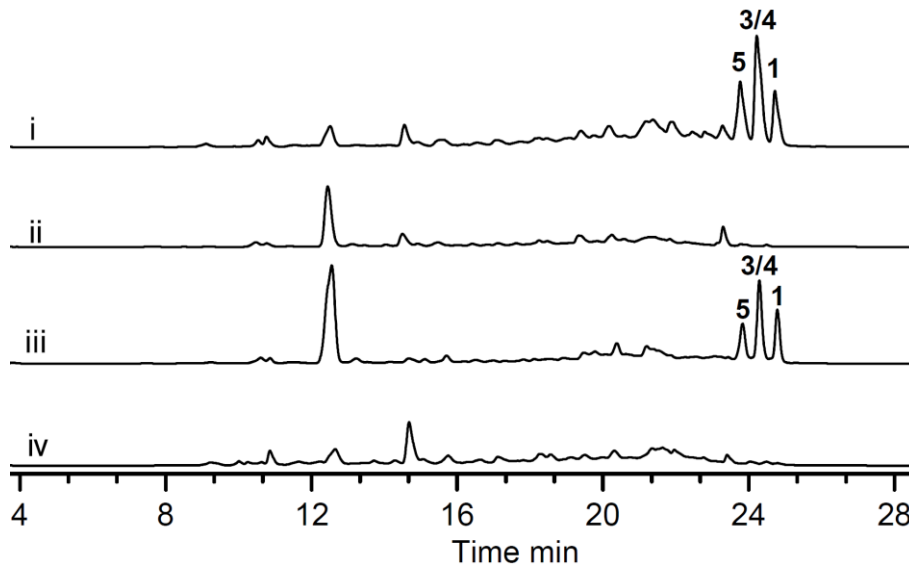

**Supplementary Figure 42.** HPLC analysis (analytical method D) of metabolites from the heterologous expression strains: (i) *S. albus* 5C1- $\Delta knmC/knmC$ ; (ii) *S. albus* 5C1- $\Delta knmC$ ; (iii) *S. albus* 5C1; (iv) *S. albus* J1074 control (strain containing vector alone). HPLC analysis was performed with a 30 min gradient elution system as follows: T = 0 min, 10% B; T = 20 min, 100% B; T = 25 min, 100% B; T = 25.1 min, 10% B; T = 30 min, 10% B (A, H<sub>2</sub>O; B, CH<sub>3</sub>OH). A representative result of  $n = 3$  independent experiments is shown. Source data are provided as a Source Data file.

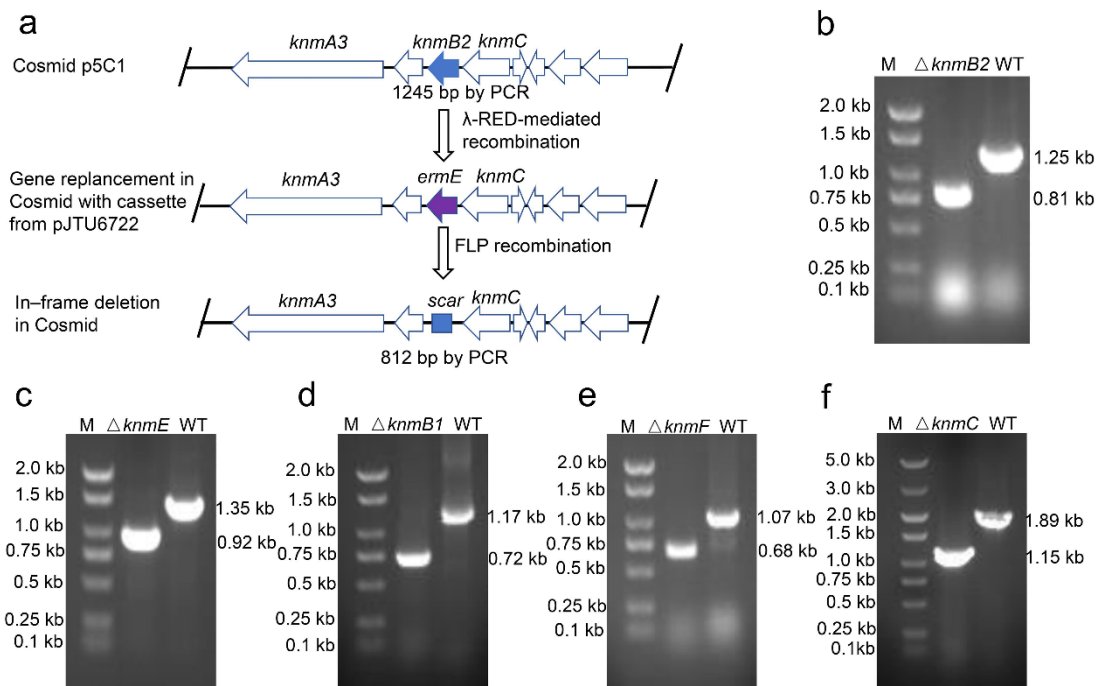

**Supplementary Figure 43.** Construction of in-frame deletion in *S. albus* 5C1. (a) Gene replacement of *knm* using the PCR-targeting method. (b-f) PCR verification of *knm* mutants by PCR using the primers listed in supplementary Table 22. Lane M: DNA molecular ladder; Lane  $\Delta knm$ , PCR product from *S. albus* 5C1 mutants; Lane WT, PCR product from the strain *S. albus* 5C1. A representative result of  $n = 2$  independent experiments is shown.

## User Spectra

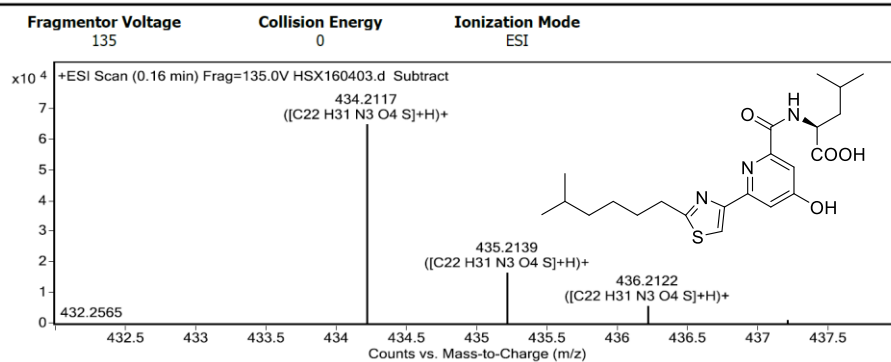

Supplementary Figure 44. HRESIMS spectrum of compound 20.

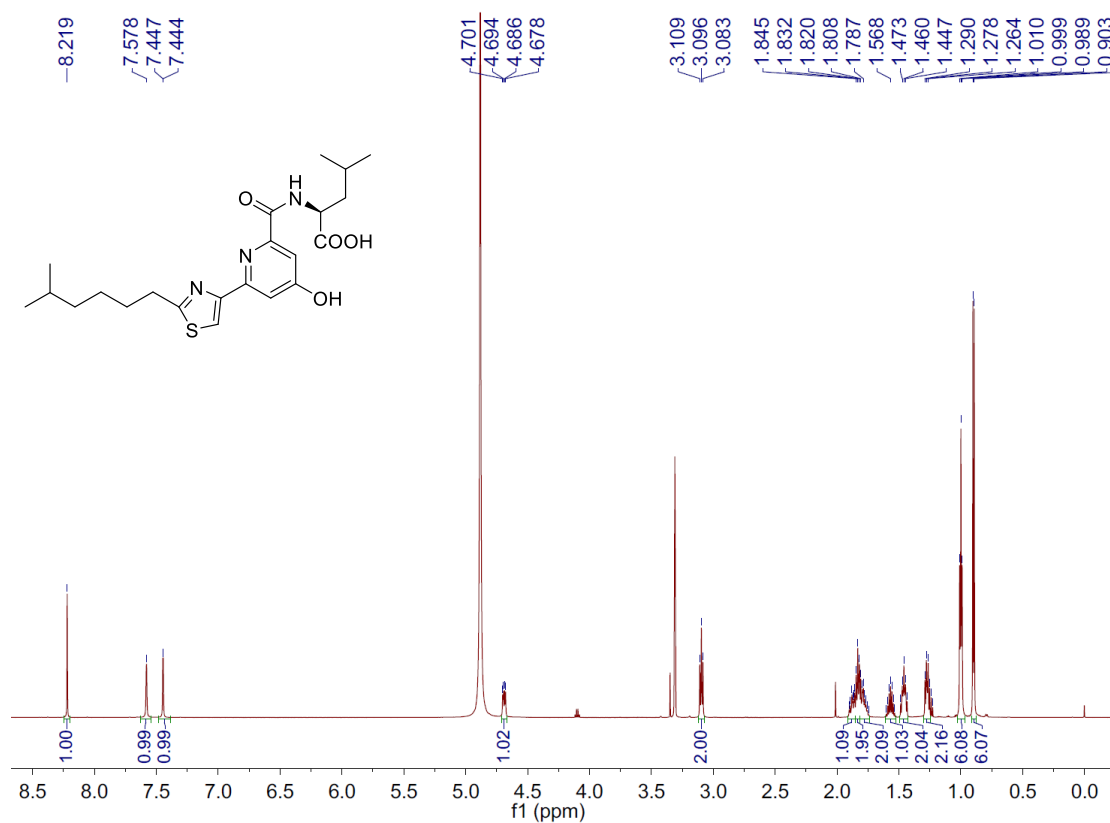

Supplementary Figure 45. <sup>1</sup>H NMR (600 MHz) spectrum of compound 20 in MeOD.

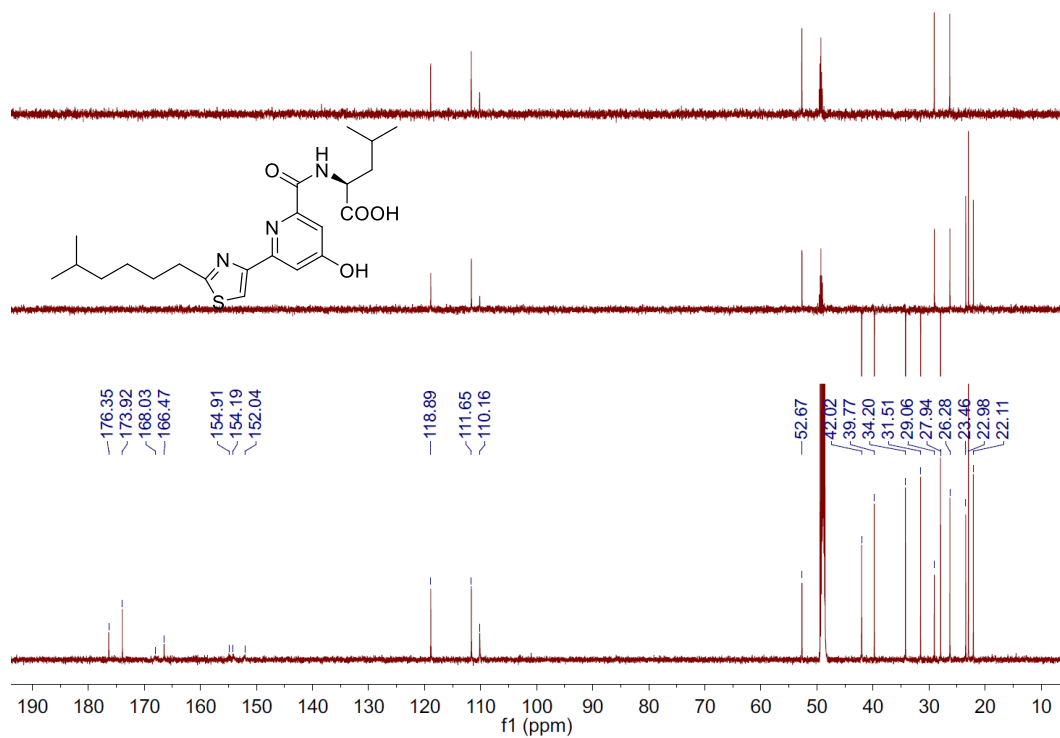

**Supplementary Figure 46.**  $^{13}\text{C}$  NMR (150 MHz) spectrum of compound **20** in MeOD.

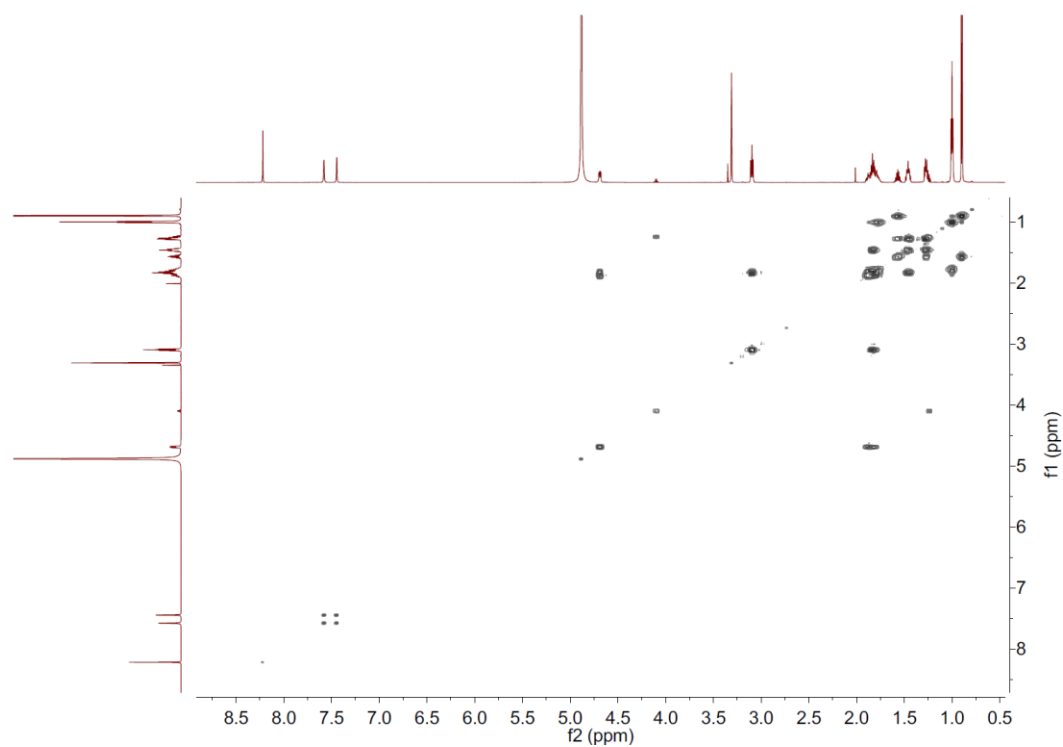

**Supplementary Figure 47.**  $^1\text{H}$ - $^1\text{H}$  COSY (600 MHz) spectrum of compound **20** in MeOD.



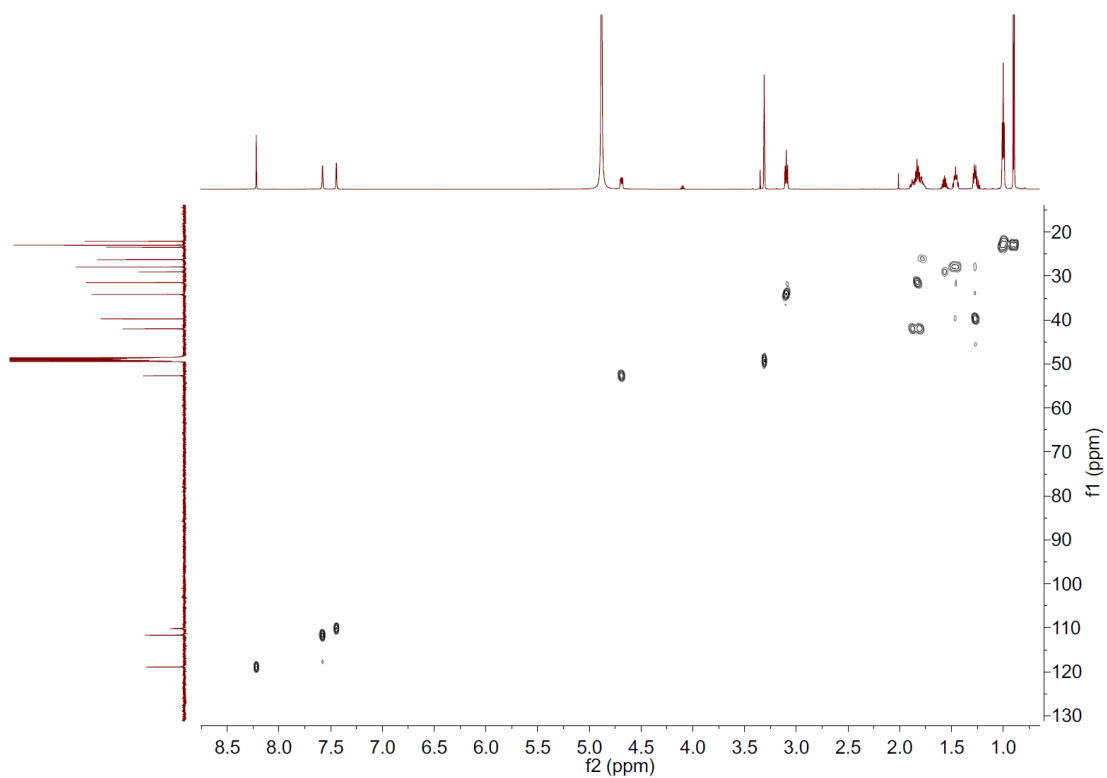

**Supplementary Figure 48.** HSQC (600 MHz) spectrum of compound **20** in MeOD.

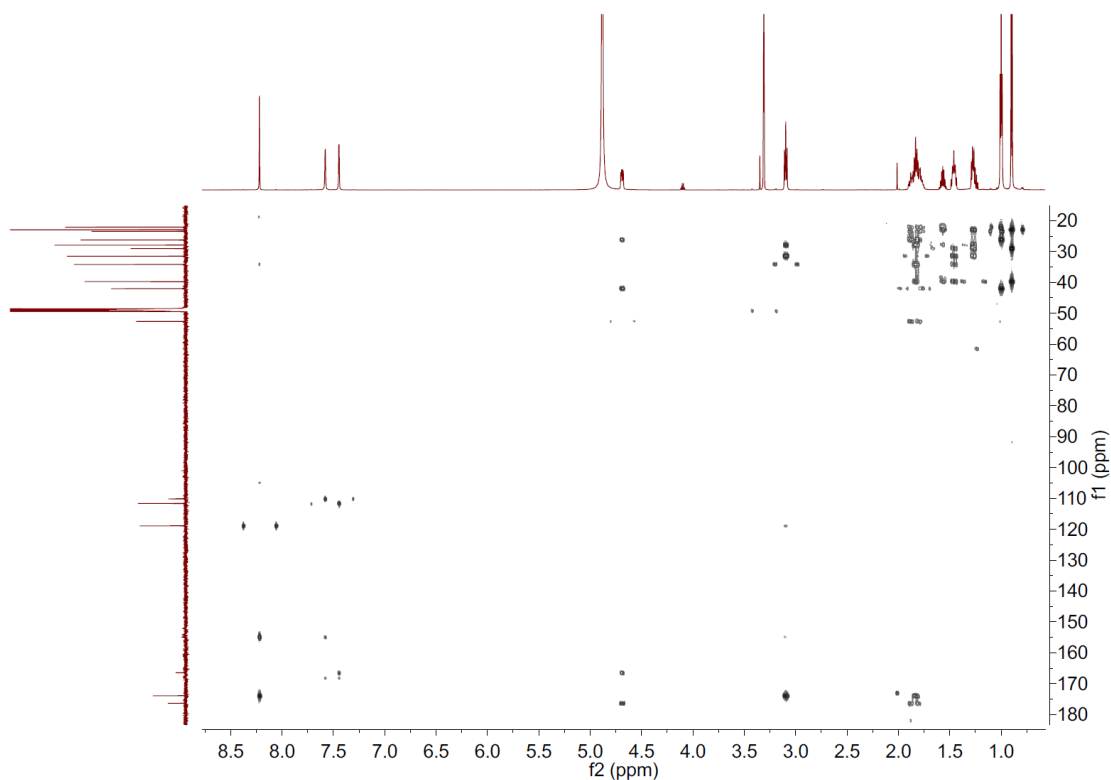

**Supplementary Figure 49.** HMBC (600 MHz) spectrum of compound **20** in MeOD.

## User Spectra

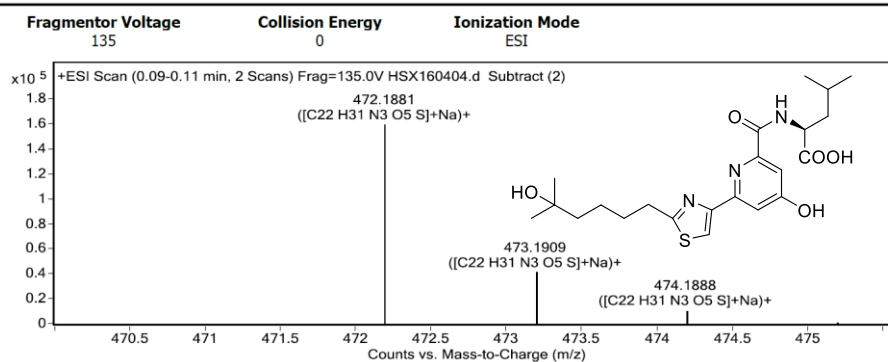

Supplementary Figure 50. HRESIMS spectrum of compound **21**.

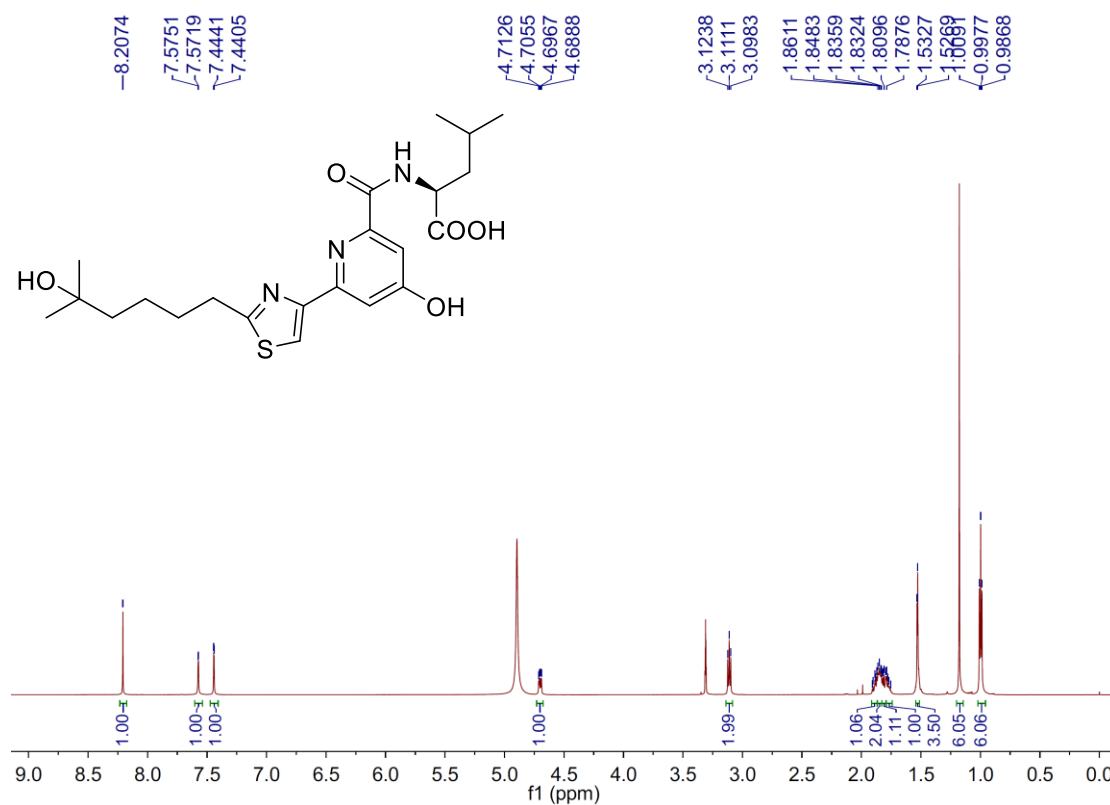

Supplementary Figure 51. <sup>1</sup>H-NMR (600 MHz) spectrum of compound **21** in MeOD.

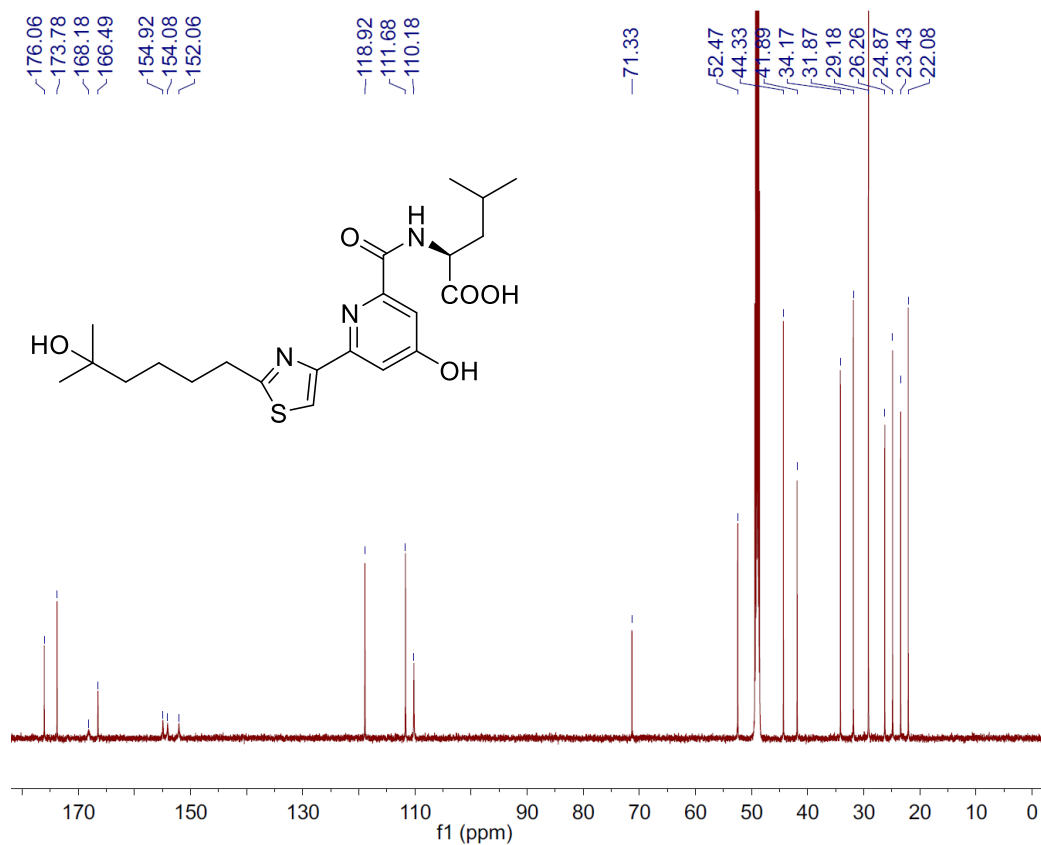

**Supplementary Figure 52.**  $^{13}\text{C}$ -NMR (150 MHz) spectrum of compound **21** in MeOD.

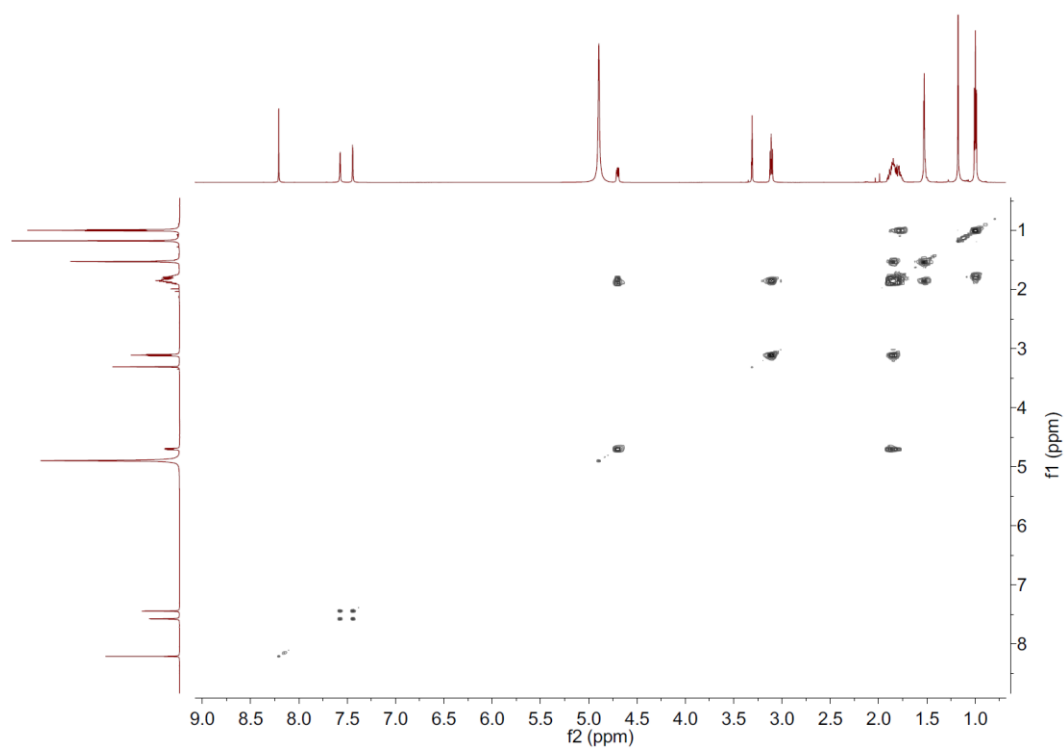

**Supplementary Figure 53.**  $^1\text{H}$ - $^1\text{H}$  COSY (600 MHz) spectrum of compound **21** in MeOD.

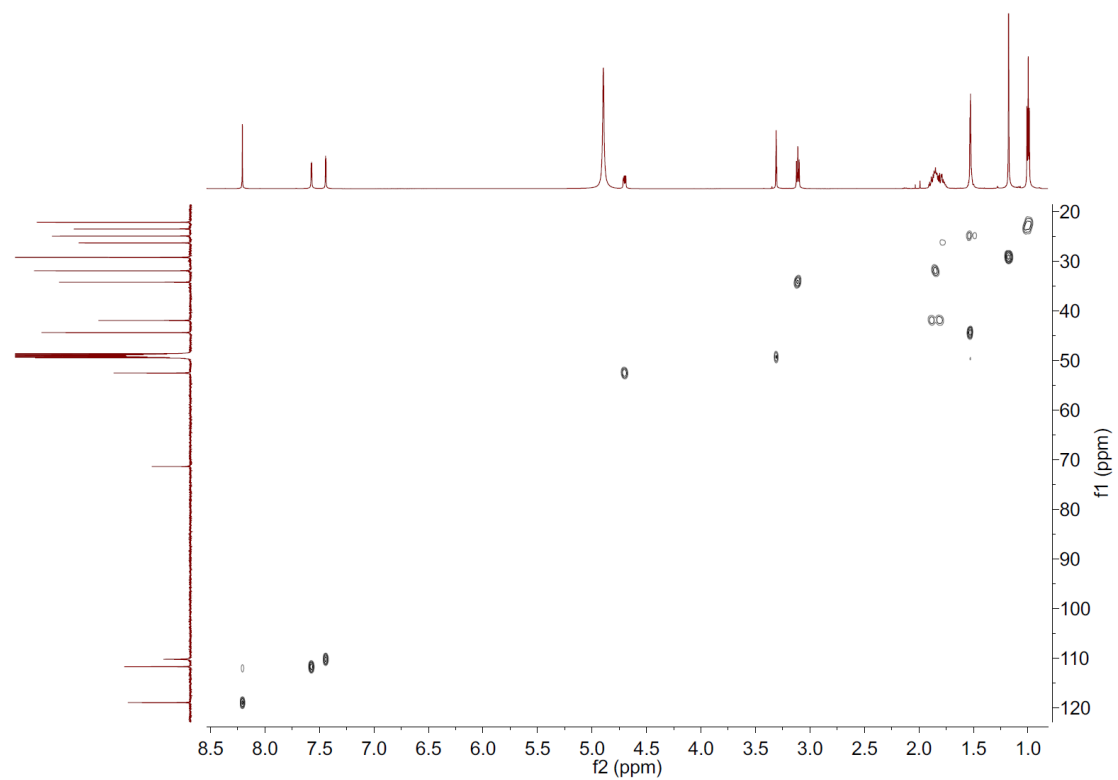

**Supplementary Figure 54.** HSQC (600 MHz) spectrum of compound **21** in MeOD.

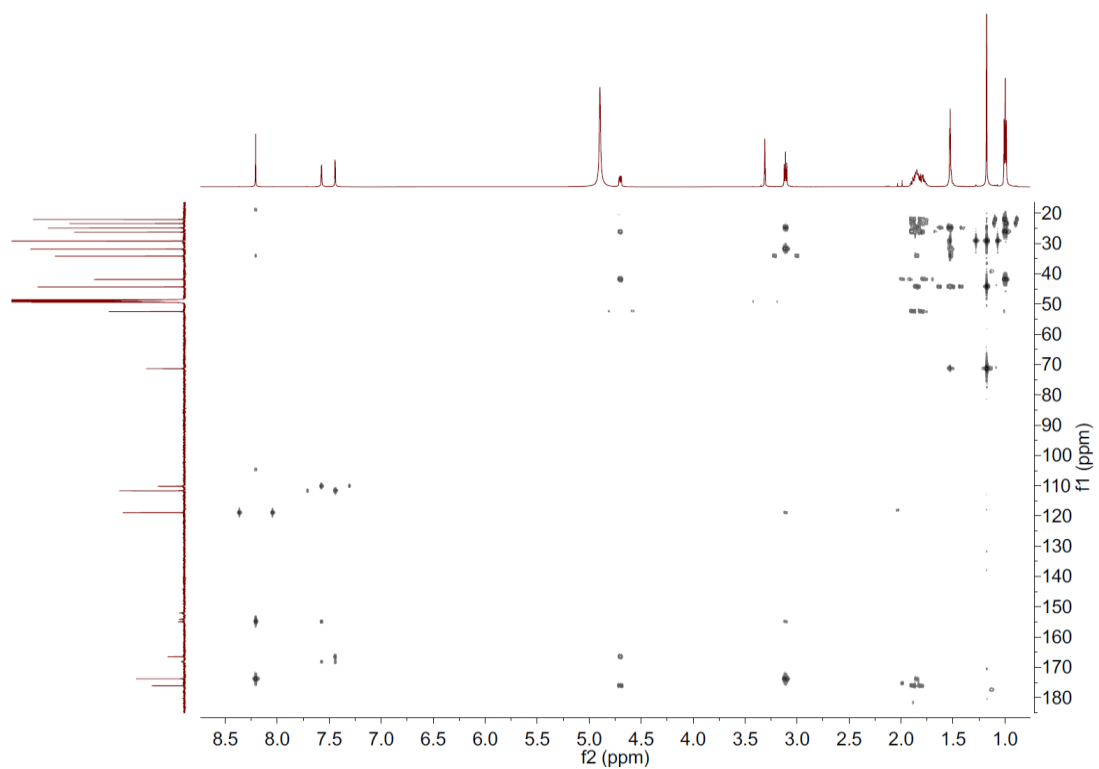

**Supplementary Figure 55.** HMBC (600 MHz) spectrum of compound **21** in MeOD.

## User Spectra

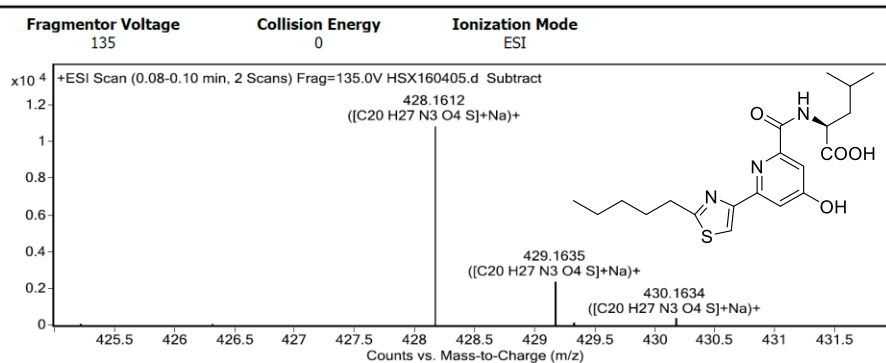

Supplementary Figure 56. HRESIMS spectrum of compound **22**.

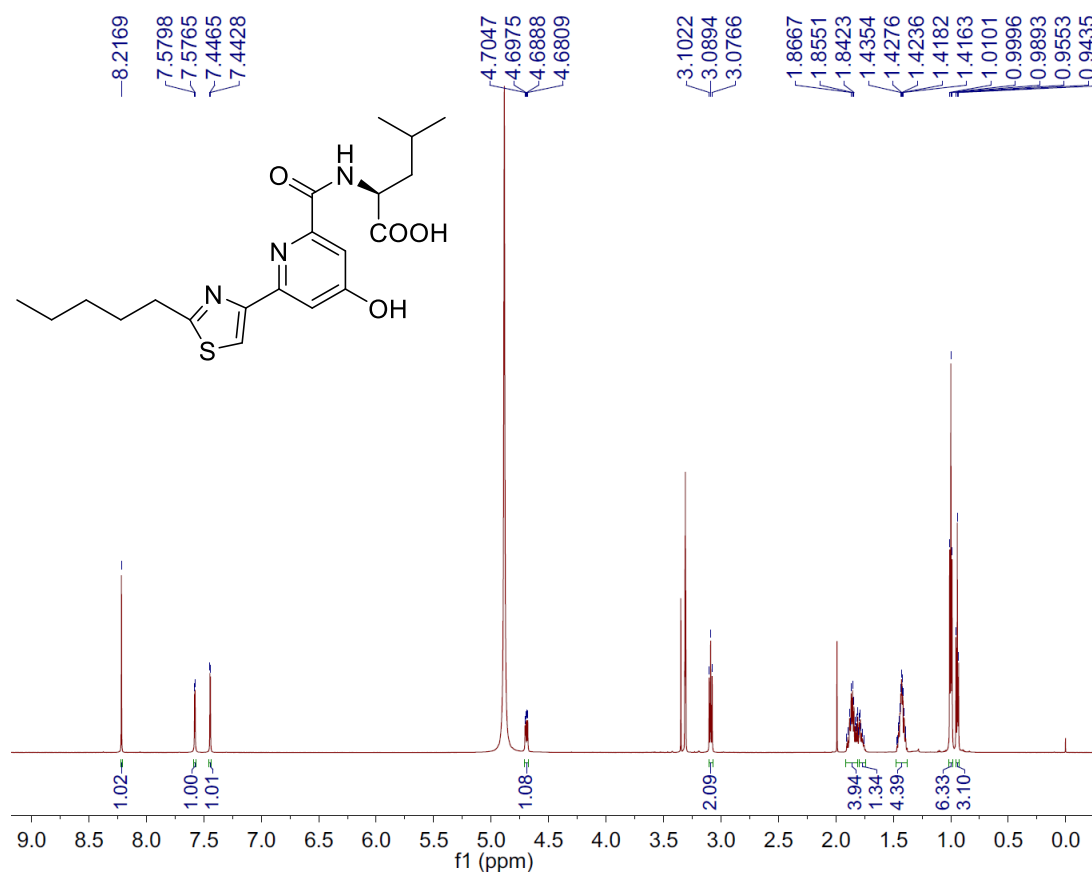

Supplementary Figure 57. <sup>1</sup>H-NMR (600 MHz) spectrum of compound **22** in MeOD.

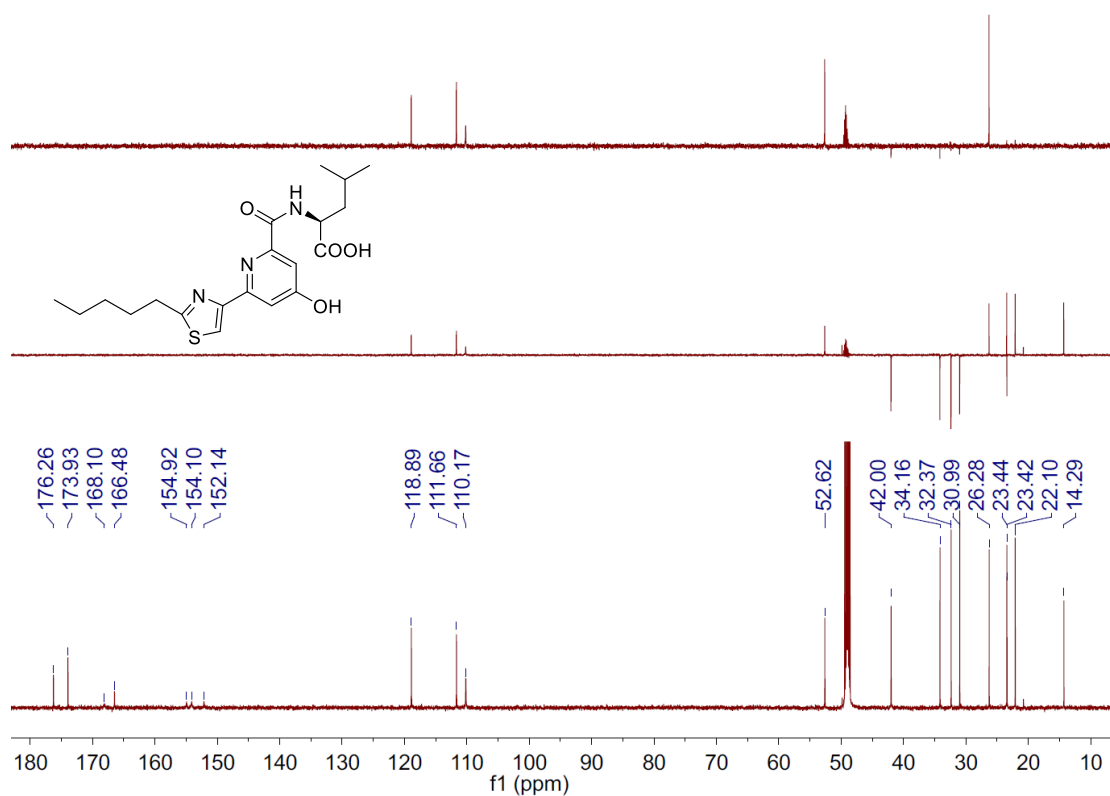

**Supplementary Figure 58.**  $^{13}\text{C-NMR}$  (150 MHz) spectrum of compound **22** in MeOD.

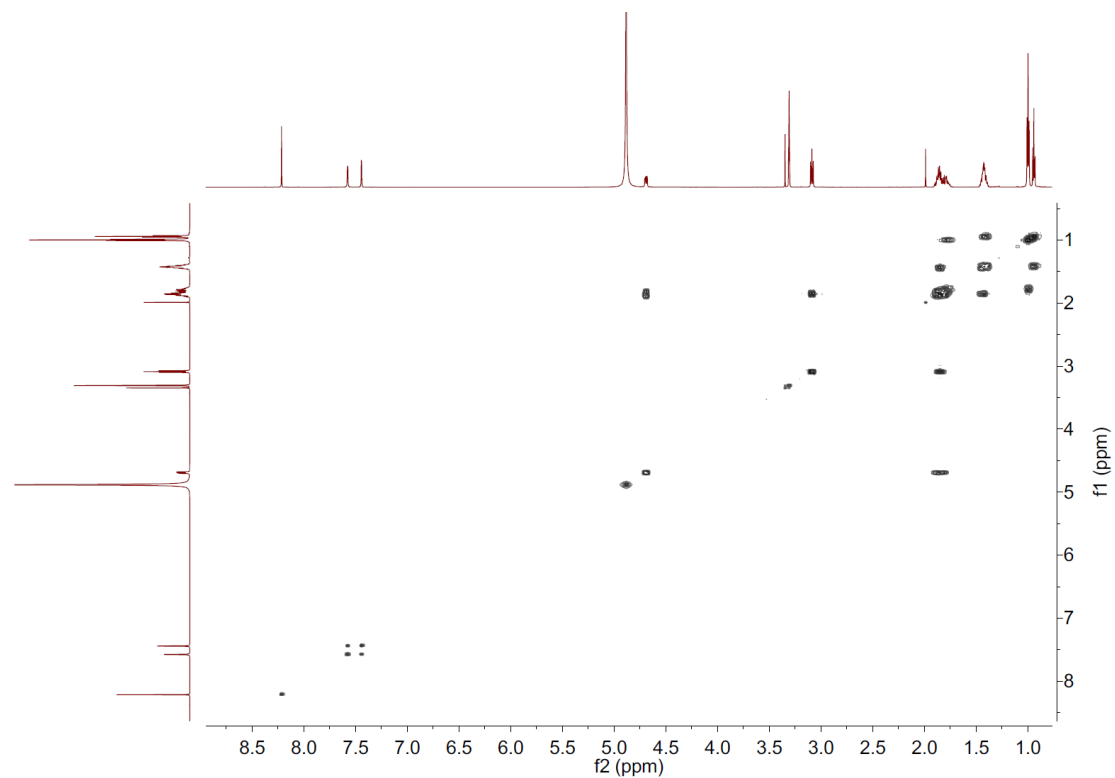

**Supplementary Figure 59.**  $^1\text{H-}^1\text{H}$  COSY (600 MHz) spectrum of compound **22** in MeOD.

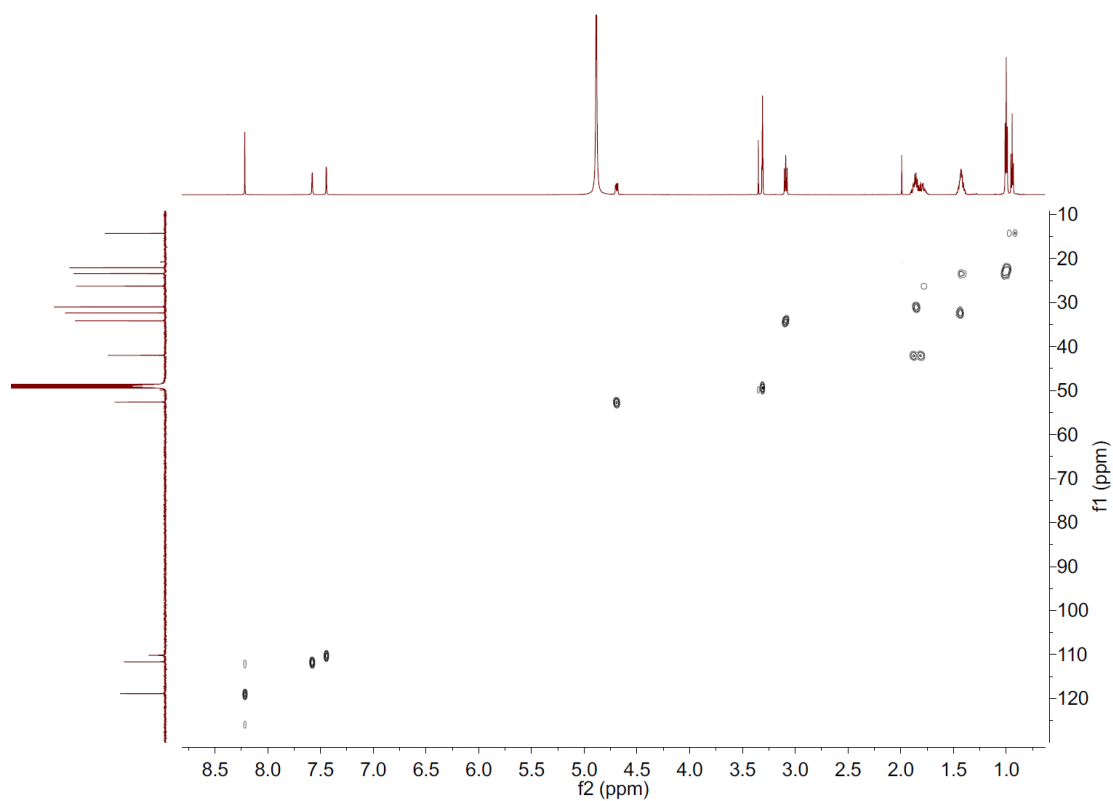

**Supplementary Figure 60.** HSQC (600 MHz) spectrum of compound **22** in MeOD.

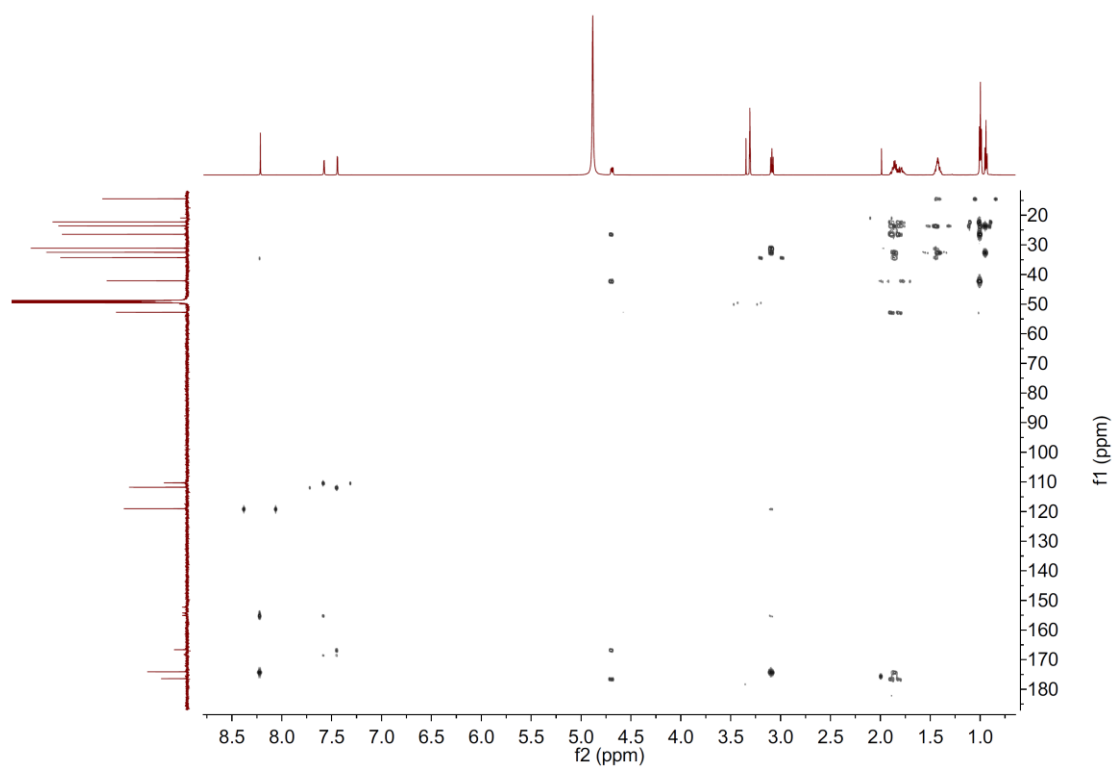

**Supplementary Figure 61.** HMBC (600 MHz) spectrum of compound **22** in MeOD.

PHBH  $\beta_1$   $\alpha_1$   $\beta_2$

1 10 20 30

PHBH .....MKTQ.....VAIIAGGPSGLLGQIMHKAIDNVI  
 KnmB1 .....MRRH.....VEIAGGFAGLTAALMARRGW.SVR  
 KnmB2 .....MN.....VAVIAGGVGGLASLARTQVGV.RTT  
 HpxO .....MK.....AIVIAGIGGLSAAVATKQSGI.DCD  
 MHPCO .....MANVNKTPGKTRR.....AEVAGGFAGLTAALMARRGW.DVR  
 3HB6H .....MSNLQDAR.....IIIAAGGIGGANALATAQKGA.NVT  
 3HB4H MQFHLNGFRPGNPLIAPASPLAPAHTAEPVSVQVDVLIIVGGPAGLTLAAQTAAFPIRITC  
 NicC .....MRGRQK.....IAIVGAGLGAATAATLQQAGF.DVE  
 PhzS .....MSEPID.....LLIAGGIGGLSCALAMHQAGIGKVT  
 PgaE .....AHHHHHHHRSDA.....VIVVAGGPGMMLAGERLAGV.EVV  
 Mab3 .....MENTVGRDRR.....VLIAGGIGGLAAGAAANLGF.RIT  
 TropB .....MPGSLIDTRQQPLS.....VGIIVGGIIGVILAAAGVRRGI.DVK  
 MtmOIV .....GSHMNSNADDAALTTD.....VVVVGGGPVGMLLAGETRAGGV.GAL  
 SalH .....MGSSHHHHHSSGDDDDKSKSPLR.....VAVIAGGIAGTALALCTSKSSHVNVK

**GXGXXG**

PHBH  $\alpha_2$   $\beta_3$   $\alpha_3$   $\alpha_4$   $\beta_4$   $\beta_5$  TT  $\beta_6$

40 50 60 70 80

PHBH LERQTPDYVLRIRAGVLEQCMVDLREAG.....VDRRMARDGLVHEGVEIAFAGQRR  
 KnmB1 VHERGTELRDFGAGIFLWENGLRVLESIG.....CADRVLRRSHEAAQWEERDSQGTL  
 KnmB2 VFERQQQFPRVAVGIVLTPNGVRCALDALG.....VGDQVRRERGHCLSREAAHQVSTLD  
 HpxO VYEAVKELKPVGAAISVWPNGVKCMHLG.....MGDIMETFGGPLRRMAYRDFPSGE  
 MHPCO LHEKSSSELRAFAGIYLWHNGLRVLEGLG.....ALDDVLQGSHTPPTYETMHNKSV  
 3HB6H LFERASEFGEVAGLQVGPHGARIILDSWG.....VLDVLSRAFLPKNIVFRDAITAE  
 3HB4H IVEQKEGPMELQADGVIACRTMEMFEAFE.....FADSIKLEACWINDVTFWPKDPDGO  
 NicC VFERQAPAFTRLGAGIHIGPNVMKIFRRMG.....LEQKLELMGSHPDFWFSRDNGTGD  
 PhzS LLESSEIRPLGVGINIQPAAVEALAEGL.....LGPALAAATAIPTHELRYIDQSGAT  
 PgaE VLERLRLVERTGESRGLGFTARTMEVFDQRG.....LILFRFGEVETSTQGH.FGGLP...  
 Mab3 ILEQAEDFKEVGAGVQIAPNGVRCALGRLG.....LMDRINTFAWRPNALVMRDAVDAS  
 TropB VFERQARGFREIAGAMAFITANAVRCMEMLDPVIVWALRSSGAVPISIGDHOAEARDYLRWV  
 MtmOIV VLEKLVPEVGHDRAGALHIRTVEITDLRGL.....LDRFLEGTQVAKGLFPAGIFPTQG  
 SalH LFERQAPAFGEIAGVSGFVNVAVEAIQRLG.....LIGELYKSVADSTPAPWQDIWFWEWR

PHBH  $\alpha_5$   $\beta_7$   $\alpha_6$   $\beta_8$  TT  $\beta_9$

90 100 110 120 130

PHBH RIDLKRLSG.....GKTVTVVGQTEVTRDLMEAREACG.ATTVYQAAEVRLLH....  
 KnmB1 MSTRPLP.....LP..GGLRMITLTRQDLYATLLDEARSLG..VEFRTGSHVVEA....  
 KnmB2 DQSLGAIIRYGEFYQR..HGTFVVIIRRADLQOVLLDAHGRSG...LRMGAKLVEV....  
 HpxO NMTQFSLAP..LIER..TGSRPCPVSFAELQREMLDYWGRDS...VQFGKRVTTC....  
 MHPCO SKET.....F..NGLPWRIITFSLHDLVNNRARRALG..VDISVNSEAVAA....  
 3HB6H VLTKIDLGS.EFRGR..YGGPFVVTIHRSDLHATLVDAARAAG..AELHTGVTVTDV....  
 3HB4H PGRIARHGRVQDTEDEGLSEFPFHVILNQARVHDHYLERMRNSPSRLEPHYARRVLDIKVDH  
 YLSRIPLGE.FARRE..YGAAYITIHGGDLHALQIEATQPG...TVHFGKRLLEKI....  
 NicC VVSEPRGVE...AG..NAYPQYSIHGGELQMI LLAAVRERLQQAQVRTGLGVERI....  
 PgaE IDFGVLEG.....AWQAAKTVPSVTEHLEQWATGLG..ADIRRGHEVLSL....  
 Mab3 DILRIPLGE.RFIER..FDEAYRVIHHADLLEAVLLEACKQNP..RVRLETSARVLA....  
 TropB DGYHESSKRLYQLDA..GIRGFEACRRDQFLEALVKVLEPEGI..VECKRQLQKIH...  
 MtmOIV LDFGLVDT.....RHPYTALVPSRTEALAEHAREAG..AEIRRGHEVVTGL....  
 SalH HAHDASLVG..ATVA..PGIGQSSIHADEIDMLEKRLPAGI...ASLGHVVDV....

PHBH TT  $\beta_{10}$   $\beta_{11}$   $\beta_{12}$   $\alpha_7$   $\eta_1$

140 150 160 170 180

PHBH ..DLQGERFVITFERDGER..LRDLDYIAGDGFHGISR.....QSTPAERLKVFERV  
 KnmB1 ..DPDG..FLVASGGR.....RWPADLVVAADGIRSTV.....DQLGLLDAHDVFGF  
 KnmB2 ..RDGDHAAACFADGS.....HVSADAVVGADGLRSVVR.....GQLFGVEPPRHVAT  
 HpxO ..EEDADGVTVWFTDGS.....SASGDLLIADGSHSALRP.....WVLFPTPQRRYAGY  
 MHPCO ..DPVG..RLTLQTEG.....VLEADLIVGADGVGSKVR.....DSIFKPDQRWVSKD  
 3HB6H ..ITEGDKAVISTDDGR.....THEADIALGMDGLKSRRLR.....EKISGD.EPVSSGY  
 3HB4H GAADYPVVTLERCDAHAHQIETVQARYVVGDDGARSNNVRAIG.RQLVGDSDANQAWGV  
 NicC ..VDEGDQVRLDFADGT.....HTVADIVIGADGISHKIR.....EELLGAEAPLYSGW  
 PhzS ..EERDGRVLIIGARDGHGK..PQALGADVLVGADGISHAVRA.....HLHPDQRPLSHGGI  
 PgaE ..TDDGAGVTVVEVRGPEG...KHTLRAAYLVGDDGGRSSVR.....KAGFDPFPGTAAATM  
 Mab3 ..VDDGPEVALHLADGR.....TLRCEILIGADGLRSVVR.....QTLIGDGAFFPRPY  
 TropB ..KNETEKVILEFADGT.....FAHVDVIGADGIRSRVR..QHLLFGEDSPYSHPHYSHK  
 MtmOIV ..RQDAEAVEVTVAGPSSG...PYRVRARYAVGDDGGRSTVR.....RLAIGVFPFGTEATV  
 SalH ..TENAEGLTNFADGS.....TYTADVAIADGDKSMTNNTLLRAAGHDVAHHPQFTGT

**DG**

PHBH  $\beta_{13}$   $\beta_{14}$  TT  $\beta_{15}$   $\beta_{16}$  TT

190 200 210 220 230

PHBH YFFGWLGLLADIPPVSHELIYANHPR.....GFALCSQRSATRSRYVQVPLTEK  
 KnmB1 GMYRFLVPLDRAPGGSGQWRNYVNVN.....ELR.RRVLYVPCNSTDLYLNLGAPDG  
 KnmB2 TLRG..ITRRELPPGRITDGTVVG.....PGLGMFFAPLGPAAEMWYATATISAE  
 HpxO VNNWGLVEIDEALAPGDQWTFVVG.....EGKRVSLMPVSAGRFYFFFDVPLP  
 MHPCO GLIRLIVPRMKKELGHGEWNTIDMWNF.....WPRVQRILYSPCENENELYLGLMAPAA  
 3HB6H AAYRGTTPYRDVELD.EDIEDVVGYIGP.....RCSFIQYPLRGGEMLNQVAVFSPGPF  
 3HB4H MDVLAIVTDFDPVRYKVAIQSEQGN.....VLIIPREGGHLVRFVYVEMTKLDA  
 NicC VAHRAILIRGVNLAQHADVFEPCVKWVSE.....D.RHMVYYTIGKRDEYVFTDGPHE  
 PhzS TMWRGVTEFFDRFLDGKTMIVANDEHWSR.....LVAYPISARHAAEGKSLVNVWCVVPS  
 PgaE EMYLADIKGVELQ.PRMIGETLPG.....GMVMVGPPLPGGITRIIVICER.GTP  
 Mab3 IYRGRVIRSELPPD.LWSEVVMWGTGP.....DADEVHYPLRTGELFNLVATFKASKD  
 TropB FAFRGLITMENASIALGEDKARTLNMHVG.....PNAHLIHYPVANETMVNIIVAFVSDPES  
 MtmOIV RALIGYVTPPERVPRRWERTPDG.....ILVLAFFPEGGGLGRVYVIEYTGHS  
 SalH SAIRGLVETSALREAYQAASLDEHLLNVPMQLIEDGHVLTFFPVKKGKLIIVAFVSDRS



$\eta^2$   $\alpha 8$   $\alpha 9$   $\beta 17$   
 P<sub>HBH</sub> 222 240 250 260 270  
 P<sub>HBH</sub> VEDWS... DERFWT... ELKARLPAEVAEKLVT... GPSLEK... SIAP... LRSFV...  
 K<sub>nmB1</sub> DEDAI... GEPLNE... EVWRASFPVLAELLTGL... AAPR... FDRYEVL...  
 K<sub>nmB2</sub> GWPRDPA... ESMRRL... ELRLEHWPSVSVSELVRA... VDR... E... YLVA... TDLADRP...  
 H<sub>pxO</sub> AGLAED... RDTLRAD... LSRFYAGWAPPVQKLI... AALDP... QTTNR... IEIHDIE...  
 M<sub>HPCO</sub> DPRGS... SVPIDL... EVWVEMFFPFLPECLIE... AAKL... KTAR... YDKYETT...  
 3<sub>HB6H</sub> KNGIE... NWGGPE... LEQAYAHCHENVRRG... IDYLW... KDRW... PMYDRE...  
 3<sub>HB4H</sub> DERVAS... RNITVE... LIATAQRVLHPYKLE... VKNVP... WWSV... YEIGQRICAKYDD...  
 N<sub>icC</sub> AWDFOGA... FVDSSQE... EMRAAFEGYHPTVQKLI... DATE... SITK... WPLRNRN...  
 P<sub>hzS</sub> AAVGQLDNEADWNRDGRLE... VLPFFADWDLGFWDI... RDL... LTRNQ... LILO... YPMVDRD...  
 P<sub>gaE</sub> PQRRE... TPPSWH... EVADAWKRLTGDIAH... AEPV... WVSA... FGNATR...  
 M<sub>ab3</sub> LSEES... IAGSRE... DLMAPYIQFHPVSRML... LALN... TERR... MVTDRE...  
 T<sub>ropB</sub> EWPDKLS... LVGPATRE... EAMGYFANWNPGLRAV... LGFMP... ENIDR... WAMFDTYDY...  
 M<sub>tmOIV</sub> PAADE... GPVTLE... DLGAARVVRGPTLTL... TEPVS... WLSR... FGDASR...  
 S<sub>alH</sub> VAKPQWPSDQPWVRPATT... EM... LHRFAGAGEAVKTL... L... T... K... SPTL... WALHDFD...

$\beta 18$   $\beta 19$   $\eta^3$   $\beta 20$   $\eta^4$   $\alpha 10$   
 P<sub>HBH</sub> 280 290 300 310  
 P<sub>HBH</sub> ... VEPMQHGRFL... LAGDAAH... IIVP... FTGAR... GLNLAAS... DVST... LYRLL... LKAYRE...  
 K<sub>nmB1</sub> ... RLRR... WSVGAVAV... VGDAAH... AMP... PTLGG... GAGTAM... MNALN... LAVAV... DEADDV...  
 K<sub>nmB2</sub> ... PLAV... WSKGRITL... LGDAAH... AMTN... FLGG... GANTT... LE... DAVV... LARCL... LDRVESD...  
 H<sub>pxO</sub> ... PFSRL... VGRVVAL... LGDAGH... STT... PIDIG... GGCAAME... DAVV... LGAV... FROTRDI...  
 M<sub>HPCO</sub> ... KLD... S... TRGKVAL... VGDAAH... AMCP... PALA... GGCAAM... VNAF... SL... SQD... LEEGSSV...  
 3<sub>HB6H</sub> ... PIEN... WVDGRM... ILL... GDAAH... PPLQ... YL... SCAVMA... IE... DAKC... LADY... AEDF... STGGN...  
 3<sub>HB4H</sub> ... VVDAVA... T... P... S... PL... PRV... F... I... G... D... A... C... H... T... H... S... F... K... A... G... C... M... N... F... S... M... Q... D... S... F... N... L... G... W... K... L... A... A... V... L... R... K...  
 N<sub>icC</sub> ... P... L... P... L... W... S... R... G... R... I... T... L... G... D... A... A... H... M... K... P... H... M... A... G... C... M... A... T... E... D... A... M... L... T... R... C... L... Q... E... T... G... L... S...  
 P<sub>hzS</sub> ... P... L... P... H... W... G... R... I... T... L... G... D... A... A... H... L... M... Y... P... M... G... A... N... G... A... S... Q... A... I... L... D... G... I... E... L... A... A... L... A... R... N... A... D... V...  
 P<sub>gaE</sub> ... Q... V... T... E... Y... R... R... G... R... V... I... L... G... D... A... A... H... I... H... L... P... A... G... G... C... M... N... T... S... I... Q... D... A... V... N... L... G... W... K... L... G... A... V... V... N... G...  
 M<sub>ab3</sub> ... P... V... S... G... W... S... R... G... S... I... T... L... G... D... A... A... H... P... M... L... Q... Y... M... A... G... A... C... Q... A... L... E... D... V... V... R... L... V... D... E... V... Q... A... Q... P... E... D...  
 T<sub>ropB</sub> ... P... A... P... F... F... S... R... G... K... I... C... L... V... G... D... A... A... H... A... A... V... P... H... H... G... A... G... A... C... I... G... I... E... D... A... L... C... A... T... V... L... L... A... E... V... F... V... S... T... R... G... K... S... S... I...  
 M<sub>tmOIV</sub> ... Q... A... K... R... Y... R... S... G... R... V... L... L... G... D... A... A... H... V... H... F... P... I... G... G... I... N... T... G... L... Q... D... A... V... N... L... G... W... K... L... A... A... R... V... R... G...  
 S<sub>alH</sub> ... P... L... P... T... Y... V... H... G... R... V... A... L... I... G... D... A... A... H... A... M... L... P... H... Q... G... A... G... A... G... O... G... L... E... D... A... Y... F... M... A... E... L... L... G... N... P... L... H... E... A... S...

**GD**

$\eta^5$   $\alpha 11$   
 P<sub>HBH</sub> 320 330 340 350  
 P<sub>HBH</sub> ... GRGE... L... L... E... R... T... S... A... I... C... L... R... R... I... W... K... A... E... R... F... S... W... W... M... T... S... V... L... H... R... ... F... P... D... T...  
 K<sub>nmB1</sub> ... P... A... A... L... M... S... W... E... A... R... E... R... O... E... T... E... R... T... Q... D... T... S... V... A... L... L... A... Q... L... ... V... P... R...  
 K<sub>nmB2</sub> ... D... I... A... D... A... L... T... G... Y... E... L... E... R... I... G... R... T... T... R... I... V... Q... S... A... A... L... A... S... G... E... ... W... S... R...  
 H<sub>pxO</sub> ... A... A... A... L... R... E... Y... E... A... Q... R... C... D... R... V... R... D... L... V... L... K... A... R... K... R... C... D... I... T... ... H... G... K...  
 M<sub>HPCO</sub> ... E... D... A... L... V... A... W... E... T... R... I... R... P... I... T... D... R... C... Q... A... L... S... G... D... Y... A... A... N... R... ... S... L... S...  
 3<sub>HB6H</sub> ... S... A... W... P... Q... I... L... K... E... W... N... T... E... R... A... P... R... C... N... R... I... L... T... T... G... R... M... W... G... E... L... W... ... H... L... D...  
 3<sub>HB4H</sub> ... Q... C... A... P... E... L... L... H... T... Y... S... S... E... R... Q... V... V... A... Q... Q... L... I... D... F... D... R... E... W... A... K... M... F... S... D... P... A... K... E... G... G... V... D... P... K... E... F... Q... Y... F... E... Q... H... G...  
 N<sub>icC</sub> ... D... H... R... T... A... F... A... L... Y... E... A... N... R... K... E... R... A... S... Q... V... Q... S... V... S... N... A... N... T... W... L... Y... ... S... Q... E...  
 P<sub>hzS</sub> ... A... A... A... L... R... E... Y... E... A... R... R... P... T... A... N... K... I... L... A... N... R... R... E... K... E... E... ... W... A... A...  
 P<sub>gaE</sub> ... T... A... T... E... E... L... L... D... S... Y... H... S... E... R... H... A... V... G... K... R... L... L... M... N... T... Q... A... Q... G... L... F... ... L... S... G...  
 M<sub>ab3</sub> ... I... P... A... A... F... S... A... Y... A... E... G... R... Y... R... R... T... A... R... V... Q... F... S... A... R... Q... L... I... E... V... C... ... V... G... V...  
 T<sub>ropB</sub> ... V... R... N... R... A... I... A... A... F... G... S... F... N... A... V... R... R... V... R... A... Q... W... F... V... D... S... R... R... R... V... C... D... L... Y... ... Q... Q... P...  
 M<sub>tmOIV</sub> ... W... G... S... E... L... L... D... T... Y... H... D... E... R... H... P... V... A... E... R... V... L... L... N... T... R... A... Q... L... A... L... M... ... R... P... D...  
 S<sub>alH</sub> ... D... I... P... A... L... L... E... V... Y... D... D... V... R... G... R... A... S... K... V... Q... L... T... S... R... E... A... G... E... L... Y... ... E... Y... R...

$\alpha 12$   $\alpha 13$   
 P<sub>HBH</sub> 360 370 380 390  
 P<sub>HBH</sub> ... A... F... S... Q... R... I... Q... Q... T... E... L... Y... Y... L... G... S... E... A... G... L... A... T... I... A... E... N... Y... V... G... ... L... P... Y... E... I... E...  
 K<sub>nmB1</sub> ... E... G... E... Q... R... S... ... E... W... T... E... E... P... L... R... T... A... A... R... ... S... P... R... G...  
 K<sub>nmB2</sub> ... D... T... A... E... I... F... S... D... Y... L... E... K... V... L... N... G... E... F... M... D... W... V... Y... G... ... F... S... P... D... T... G... H... S... R... R... Q...  
 H<sub>pxO</sub> ... D... M... Q... L... T... E... A... W... Y... Q... E... L... R... E... E... T... G... E... R... I... I... N... G... M... C... D... ... T... I... L... S... G... P... L... G...  
 M<sub>HPCO</sub> ... K... G... N... M... F... T... P... A... A... L... E... A... A... R... Y... D... P... L... R... R... V... Y... S... ... W... P... O...  
 3<sub>HB6H</sub> ... G... T... A... R... I... A... R... N... E... L... F... R... T... R... D... T... S... Y... K... Y... T... D... W... L... W... G... Y... S... ... S... D... R... A... S... K... L... G... P... E... Q...  
 3<sub>HB4H</sub> ... R... F... T... A... G... V... G... T... H... Y... A... P... S... L... L... T... G... Q... A... K... H... Q... A... L... A... S... G... F... T... V... G... M... R... F... H... S... A... P... V... V... R... V... C... D... A... K... P... V... O... L... G... H... C... K... G... A... D... G... R... W...  
 N<sub>icC</sub> ... D... P... A... W... V... Y... G... Y... D... L... Y... G... Q... Q... L... E... S... G... E... A... A... ...  
 P<sub>hzS</sub> ... A... S... R... P... K... T... E... K... S... A... A... L... E... A... I... T... G... S... Y... R... N... Q... V... E... R... P... R...  
 P<sub>gaE</sub> ... P... E... V... Q... P... L... R... D... V... L... T... E... L... I... Q... Y... G... E... V... A... R... H... L... A... G... M... V... S... G... L... E... I... T... Y... D... ... V... G... T... G... S... H... P... L... L... G... R... M... P... A... L...  
 M<sub>ab3</sub> ... G... V... M... A... E... V... R... R... S... Y... F... S... Q... R... S... D... E... Q... K... F... E... S... L... A... N... L... Y... S... ... D... R... A... G... E... K... F... Q...  
 T<sub>ropB</sub> ... E... W... A... D... P... Q... R... I... K... A... E... N... C... F... E... E... I... K... D... R... S... H... K... I... W... H... F... D... Y... N... ... S... M... L... Q... E... A... I... E... Y... R...  
 M<sub>tmOIV</sub> ... E... Q... H... T... T... P... L... R... G... F... V... E... L... L... G... T... D... E... V... N... R... Y... F... T... G... M... I... T... G... D... V... R... Y... A... T... F... A... P... A... A... P... A... R... P... H... W... A... G... R... F... A... G... G... L...  
 S<sub>alH</sub> ... T... P... G... V... E... R... D... T... A... K... L... K... A... L... E... S... R... M... N... W... I... W... N... ... Y... D... L... G... A... E... A... R... L... A... V...

P<sub>HBH</sub>  
 P<sub>HBH</sub> ...  
 K<sub>nmB1</sub> ...  
 K<sub>nmB2</sub> ... VTEARS...  
 H<sub>pxO</sub> ...  
 M<sub>HPCO</sub> ...  
 3<sub>HB6H</sub> ... KLI SEEDLNSAVDHHHHHH...  
 3<sub>HB4H</sub> ... RLYAFAAQNDLAQPESGLLALCRFLLEGDAASPLRRFTPAGQDIDSIFDLRAVFPQAYTEV  
 N<sub>icC</sub> ...  
 P<sub>hzS</sub> ...  
 P<sub>gaE</sub> ... ELTTATRETS... STELLHTARGVLLDLADNPRLRARAAAWSDRVDIVTAVPGEVSATS  
 M<sub>ab3</sub> ...  
 T<sub>ropB</sub> ... HNMGS...  
 M<sub>tmOIV</sub> ... VLSGSPSGEPVPVAELLR SARPLLLDLAGRADLREATRPWSDR... VSVVAGEATVEP  
 S<sub>alH</sub> ... KPALA...

**PHBH**

```
PHBH .....
KnmB1 .....
KnmB2 .....
HpxO .....
MHPCO .....
3HB6H .....
3HB4H ALETLPALLLPPKQQLGMIDYEKVFSPDLKNAGQDIFELRGIDRQQGALVVVVRPDQYVAQ
NicC .....
PhzS .....
PgaE GLRDTTAVLIRPDGHVAAAP..GSHHDLPMALERWFGAPLTG.....
Mab3 .....
TropB .....
MtmOIV ...PAQALLVRPDGYVAVAWAGSPAATADELRASLARWFGPPANREPVGHQERAGRGRPLS
SalH .....
```

**PHBH**

```
PHBH .....
KnmB1 .....
KnmB2 .....
HpxO .....
MHPCO .....
3HB6H .....
3HB4H VLPLGDHAALSAYFESFMRA
NicC .....
PhzS .....
PgaE .....
Mab3 .....
TropB .....
MtmOIV ALKPE.....
SalH .....
```

**Supplementary Figure 62.** Structure-based sequence alignment of KnmB1, KnmB2 and the other group A FPMOs. Identical residues are shown in red. FAD fingerprints are underlined in blue. Secondary structure assigned from the PHBH crystal structure (PDB: 1pbe) is indicated above the sequences. Uric acid monooxygenase (HpxO, PDB: 3rp6); 2-methyl-3-hydroxypyridine-5-carboxylic acid oxygenase (MHPCO, PDB: 3gmc); 3-hydroxybenzoate 6-hydroxylase (3HB6H, PDB: 4bk1); 3-hydroxybenzoate hydroxylase (3HB4H, PDB: 2dkh); 6-hydroxynicotinic acid 3-monooxygenase (NicC, PDB: 5eow); 5-methylphenazine 1-carboxylate monooxygenase ( PhzS, PDB: 2rgj); aromatic hydroxylase involved in angucycline biosynthesis (PgaE, PDB: 2qa1); 3-aminobenzoate 6-monooxygenase (Mab3, GenBank: ARD05467); 3-methylorcinaldehyde monooxygenase (TropB, PDB: 6nes); premithramycin B monooxygenase (MtmOIV, PDB: 4k5s); salicylate hydroxylase (SalH, PDB: 5evy).

## User Spectra

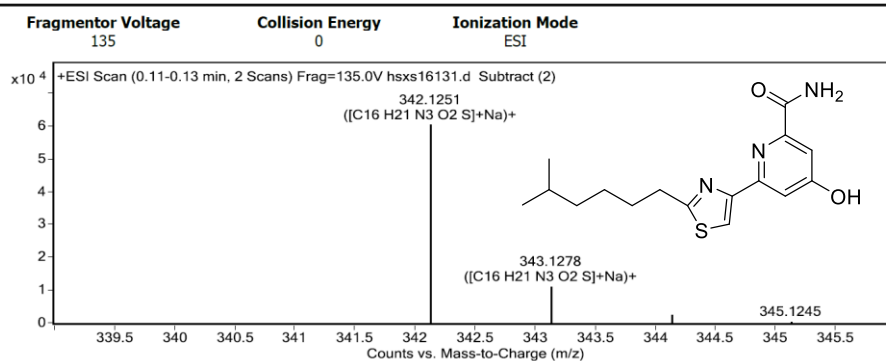

Supplementary Figure 63. HRESIMS spectrum of compound **24**.

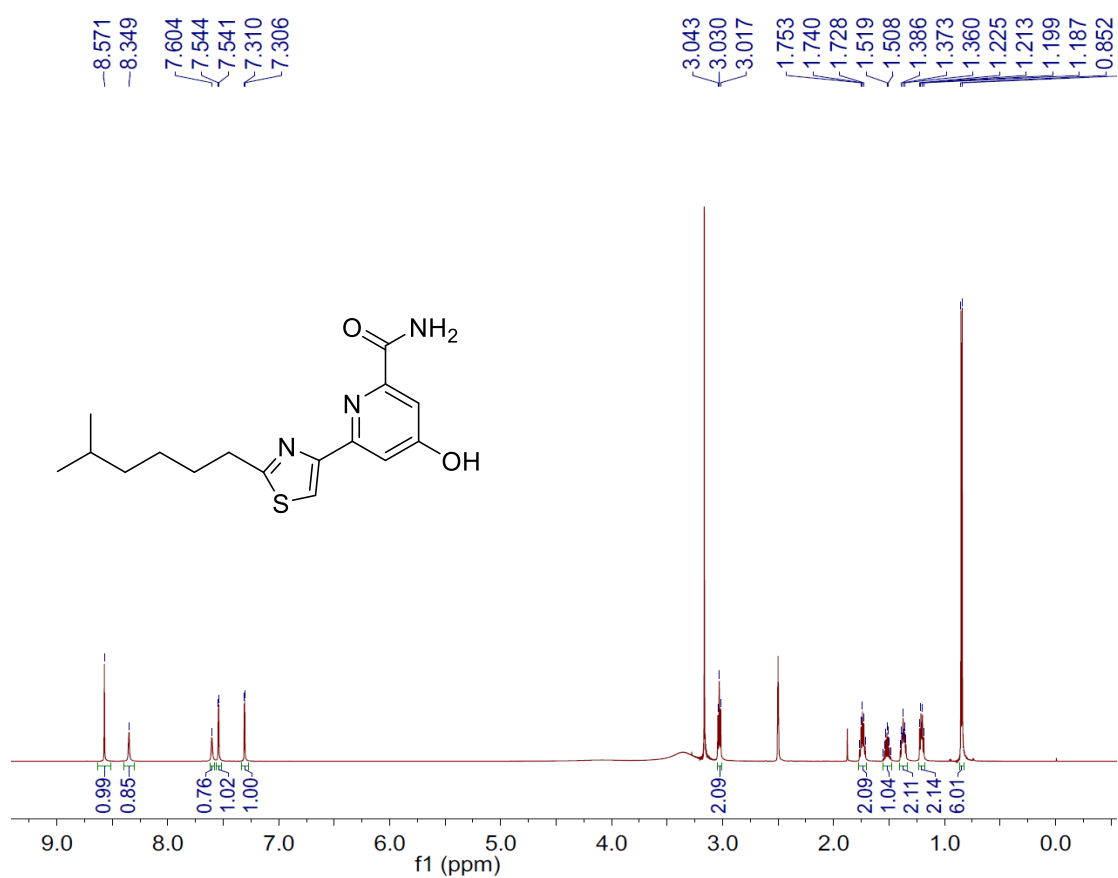

Supplementary Figure 64. <sup>1</sup>H-NMR (600 MHz) spectrum of compound **24** in DMSO-*d*<sub>6</sub>.

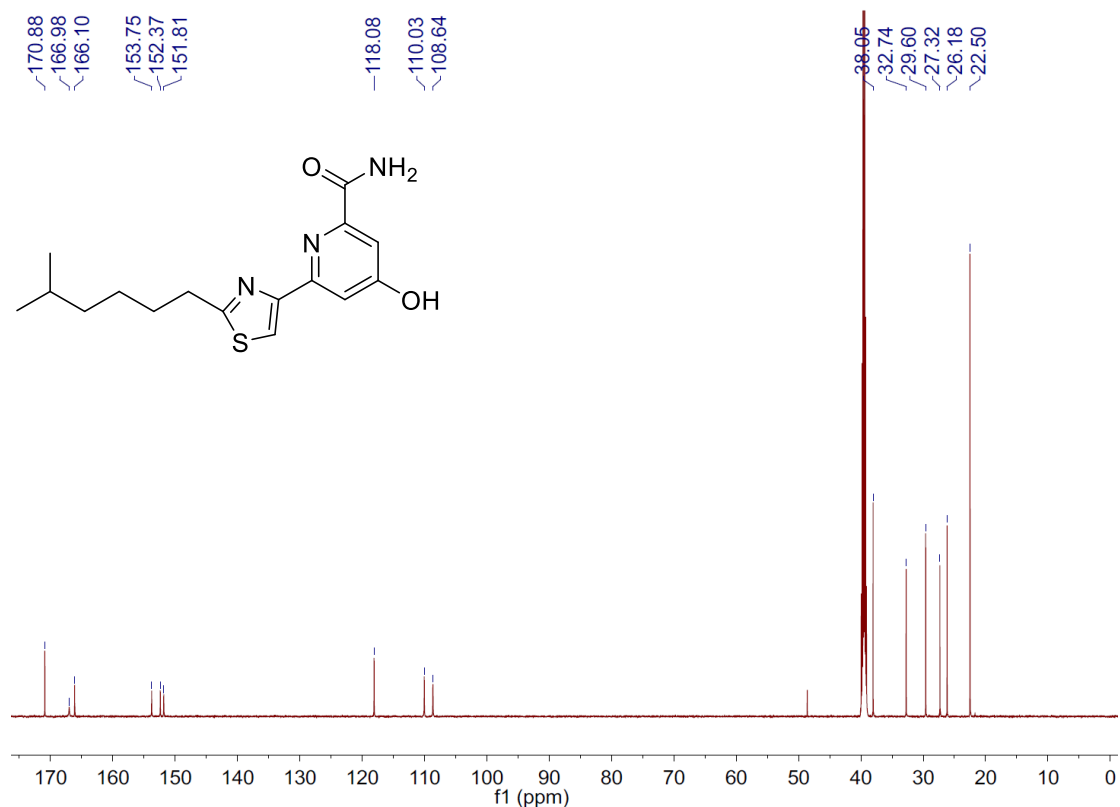

**Supplementary Figure 65.** <sup>13</sup>C-NMR (150 MHz) spectrum of compound 24 in DMSO-*d*<sub>6</sub>.

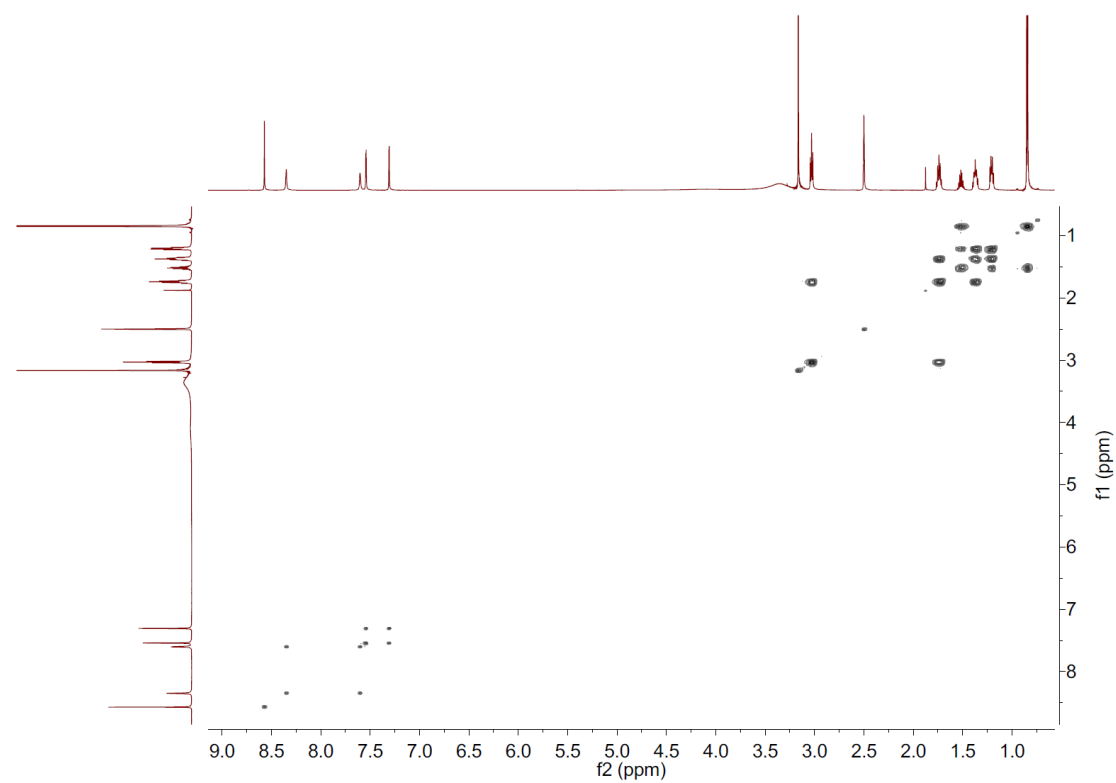

**Supplementary Figure 66.** <sup>1</sup>H-<sup>1</sup>H COSY (600 MHz) spectrum of compound 24 in DMSO-*d*<sub>6</sub>.

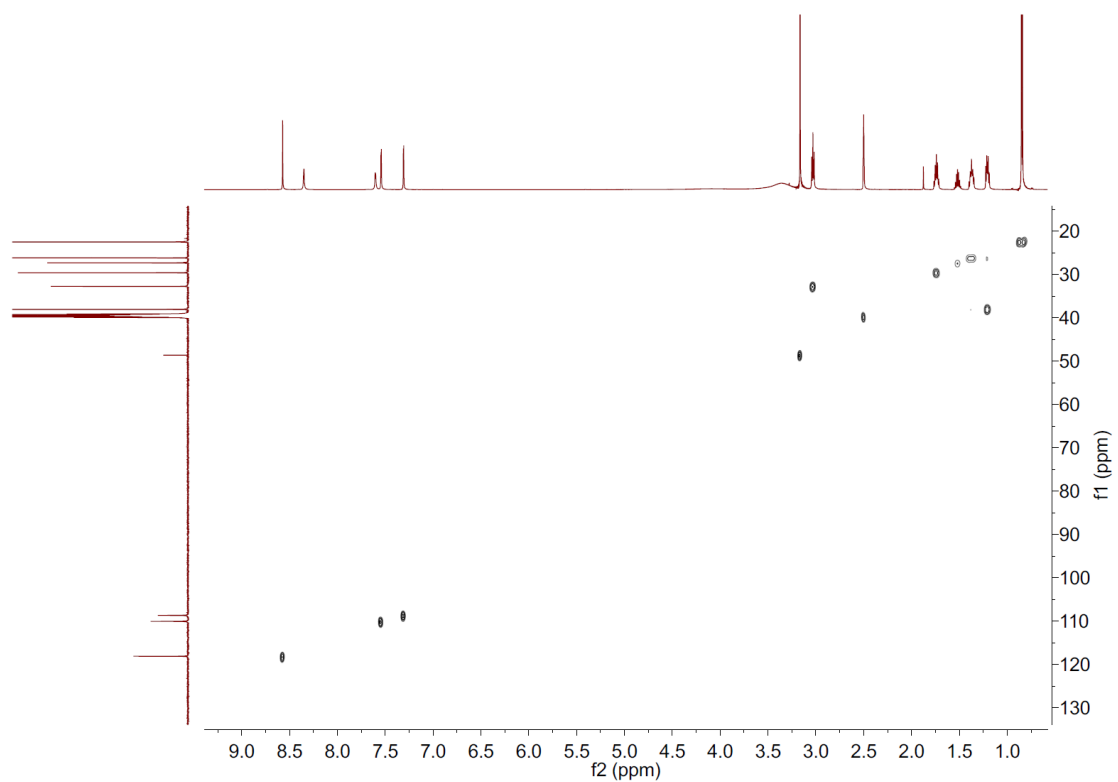

**Supplementary Figure 67.** HSQC (600 MHz) spectrum of compound **24** in DMSO-*d*<sub>6</sub>.

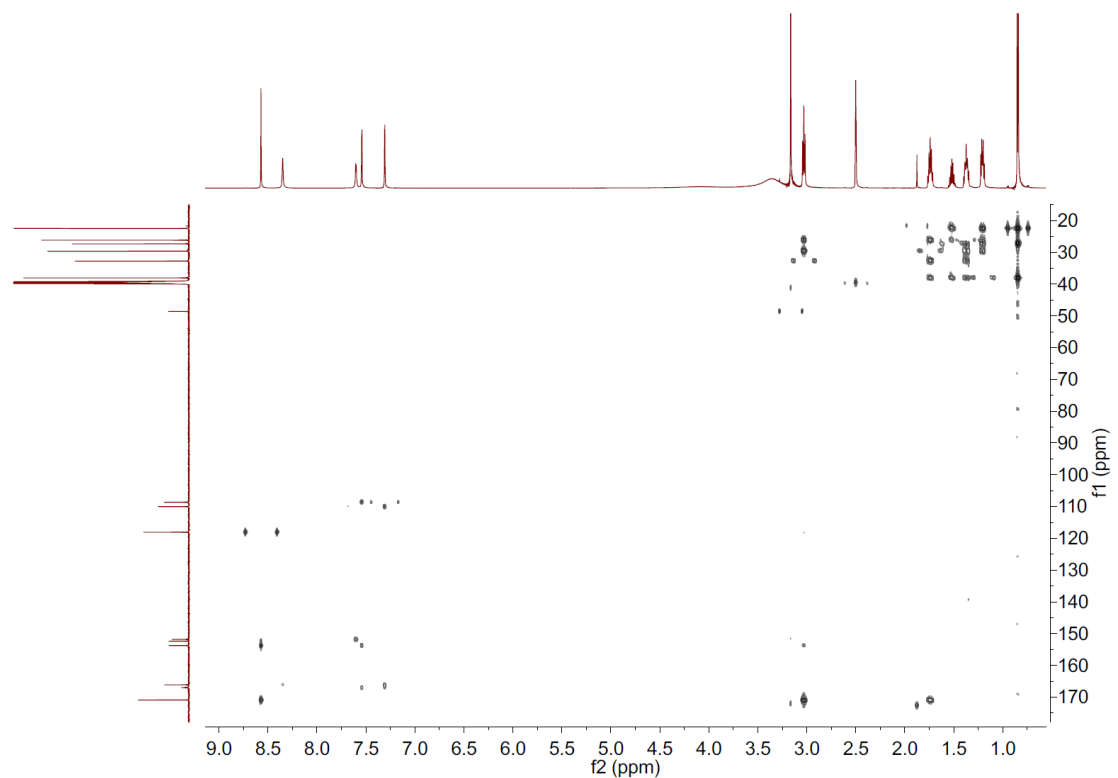

**Supplementary Figure 68.** HMBC (600 MHz) spectrum of compound **24** in DMSO-*d*<sub>6</sub>.

## User Spectra

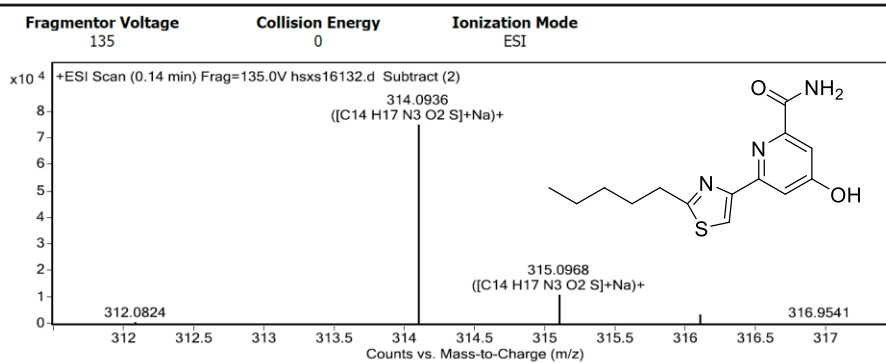

Supplementary Figure 69. HRESIMS spectrum of compound **25**.

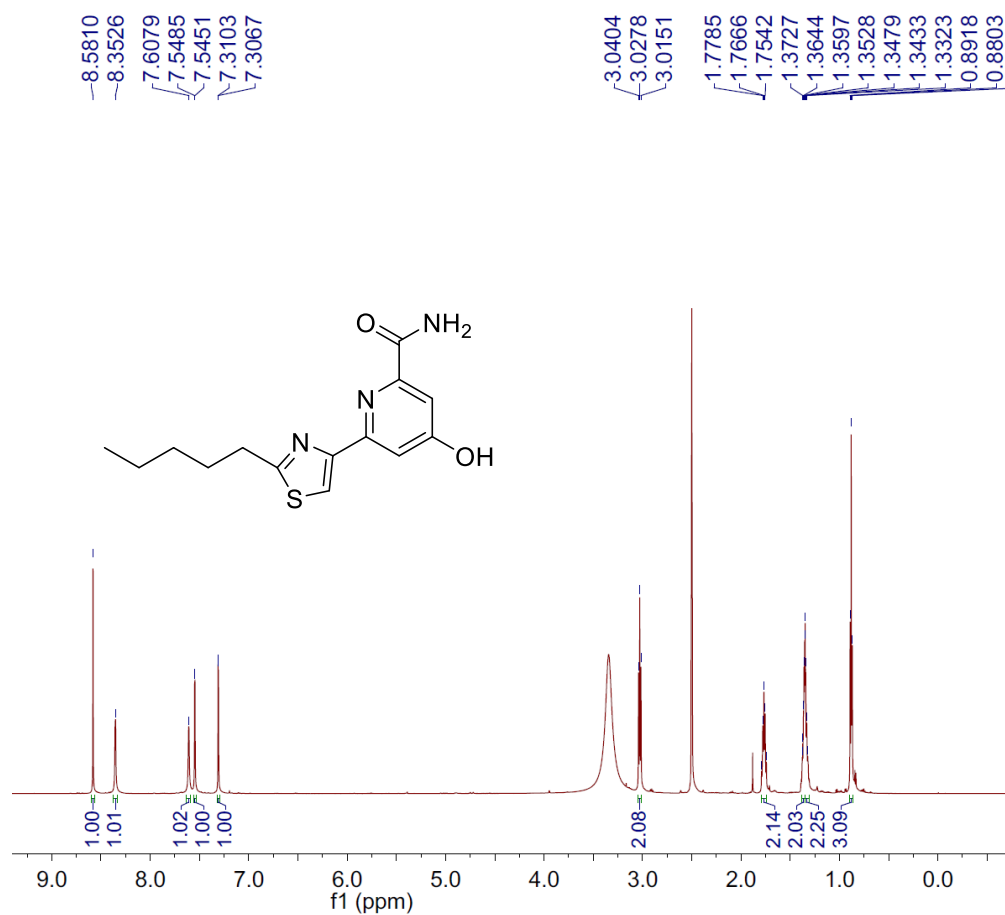

Supplementary Figure 70.  $^1\text{H-NMR}$  (600 MHz) spectrum of compound **25** in  $\text{DMSO-}d_6$ .

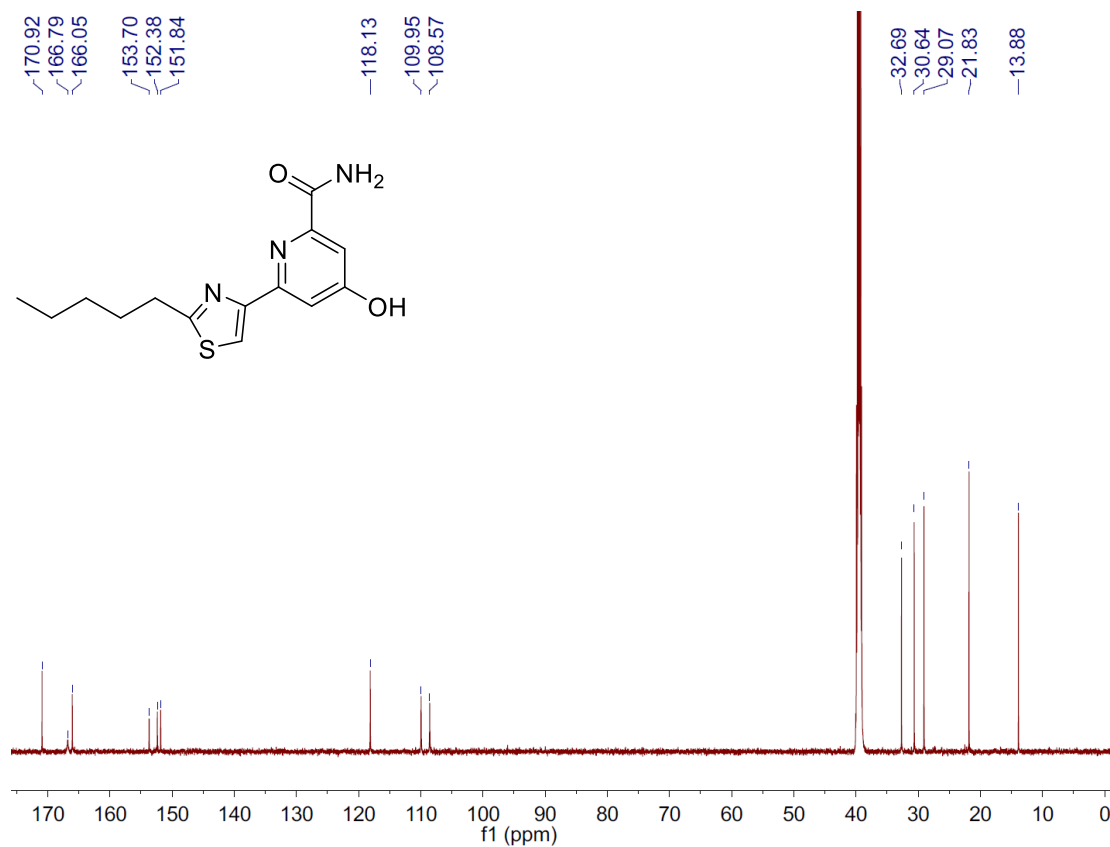

**Supplementary Figure 71.**  $^{13}\text{C}$ -NMR (150 MHz) spectrum of compound **25** in  $\text{DMSO-}d_6$ .

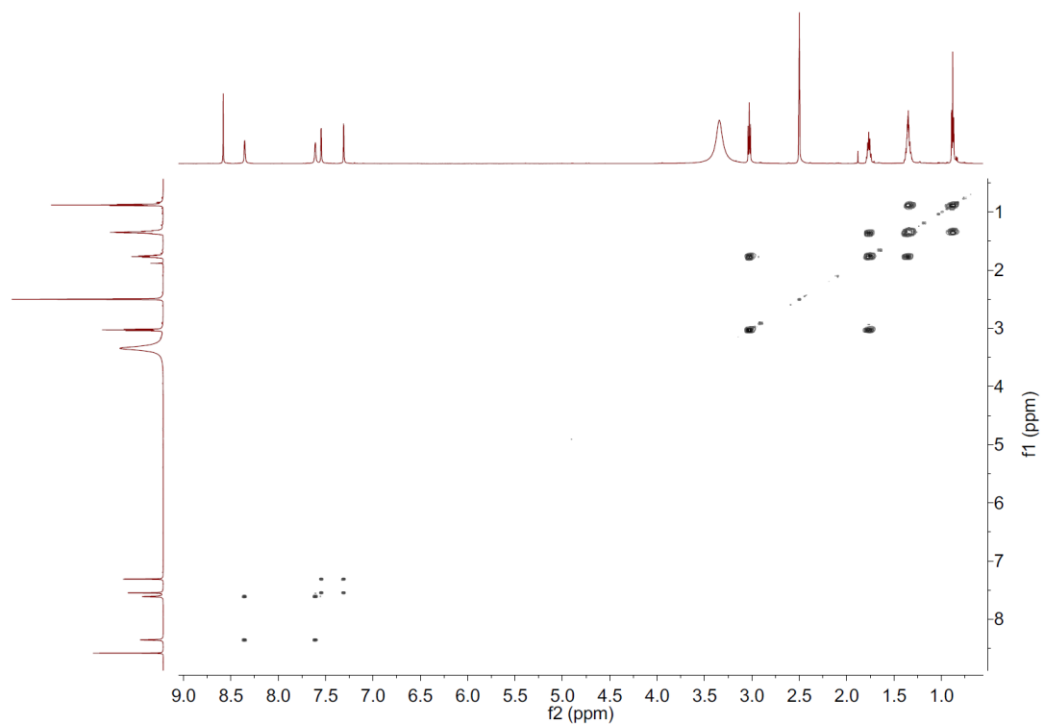

**Supplementary Figure 72.**  $^1\text{H}$ - $^1\text{H}$  COSY (600 MHz) spectrum of compound **25** in  $\text{DMSO-}d_6$ .

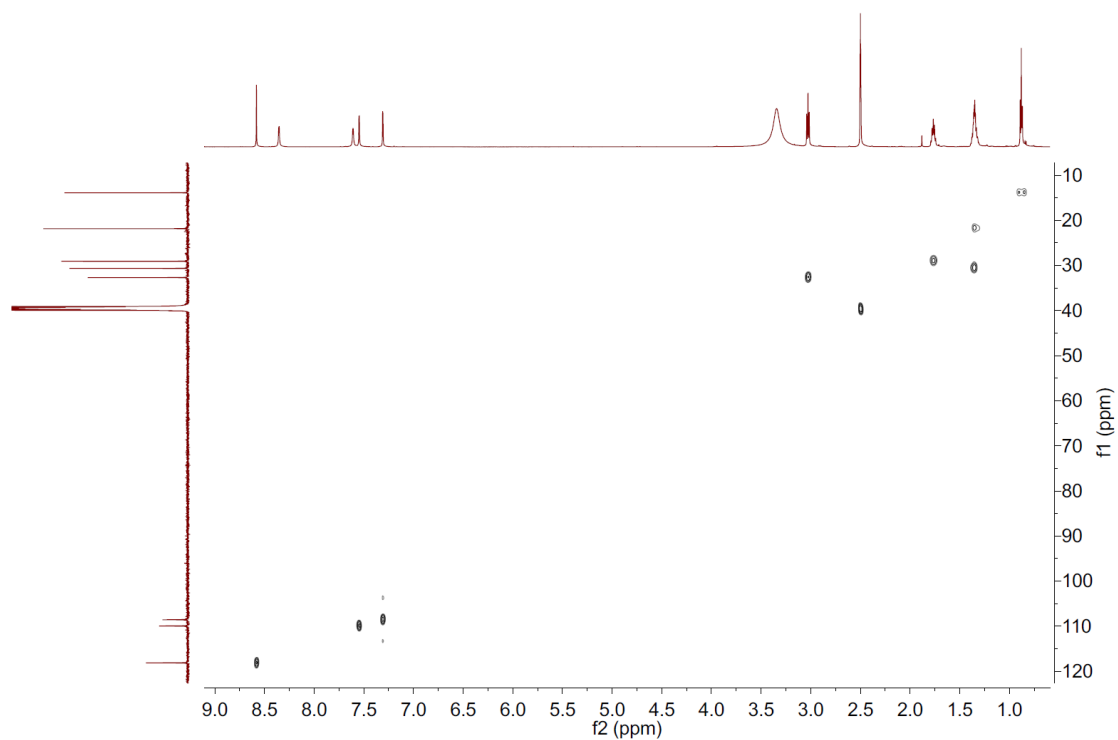

**Supplementary Figure 73.** HSQC (600 MHz) spectrum of compound **25** in DMSO- $d_6$ .

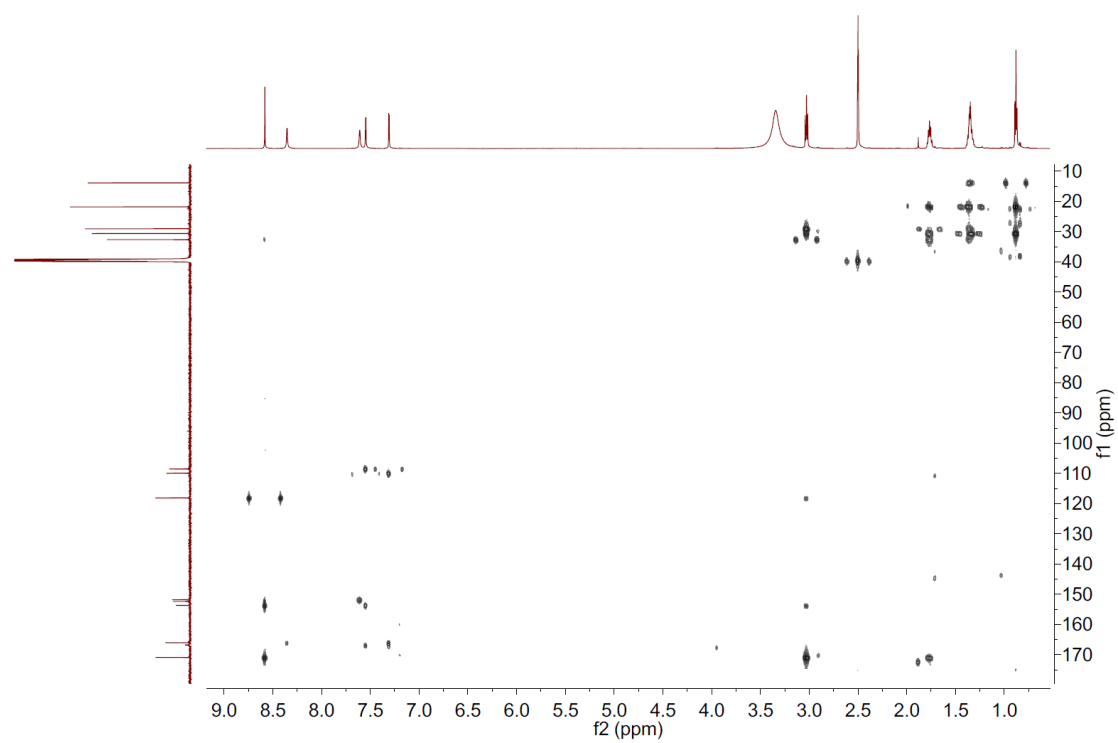

**Supplementary Figure 74.** HMBC (600 MHz) spectrum of compound **25** in DMSO- $d_6$ .



## User Spectra

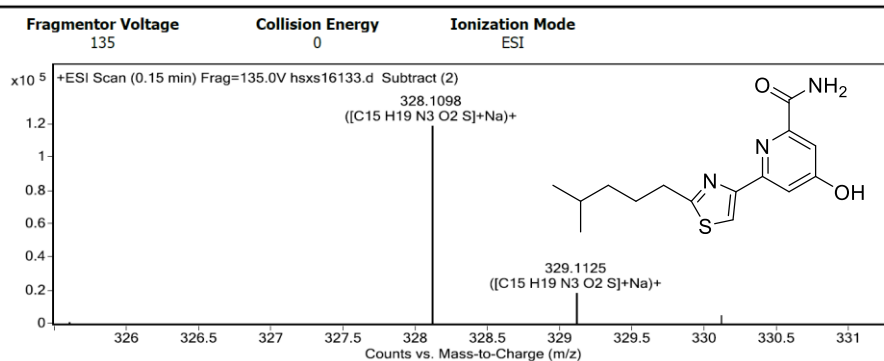

Supplementary Figure 75. HRESIMS spectrum of compound **26**.

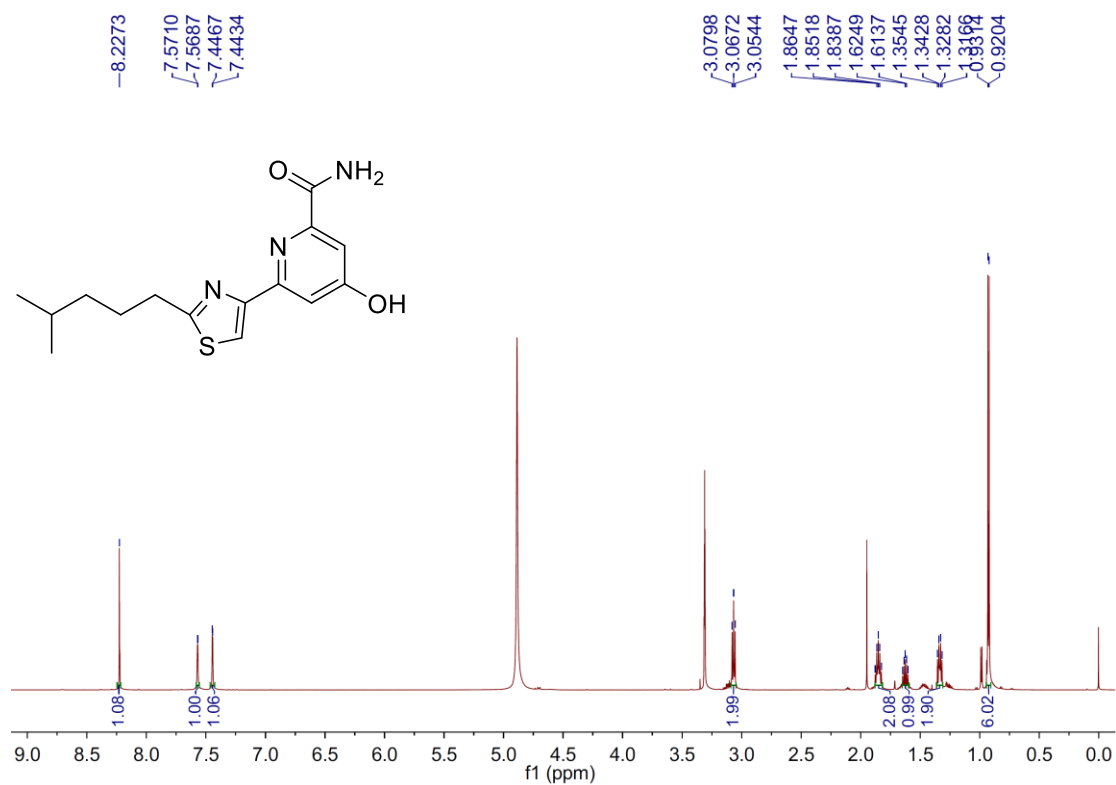

Supplementary Figure 76. <sup>1</sup>H-NMR (600 MHz) spectrum of compound **26** in MeOD.

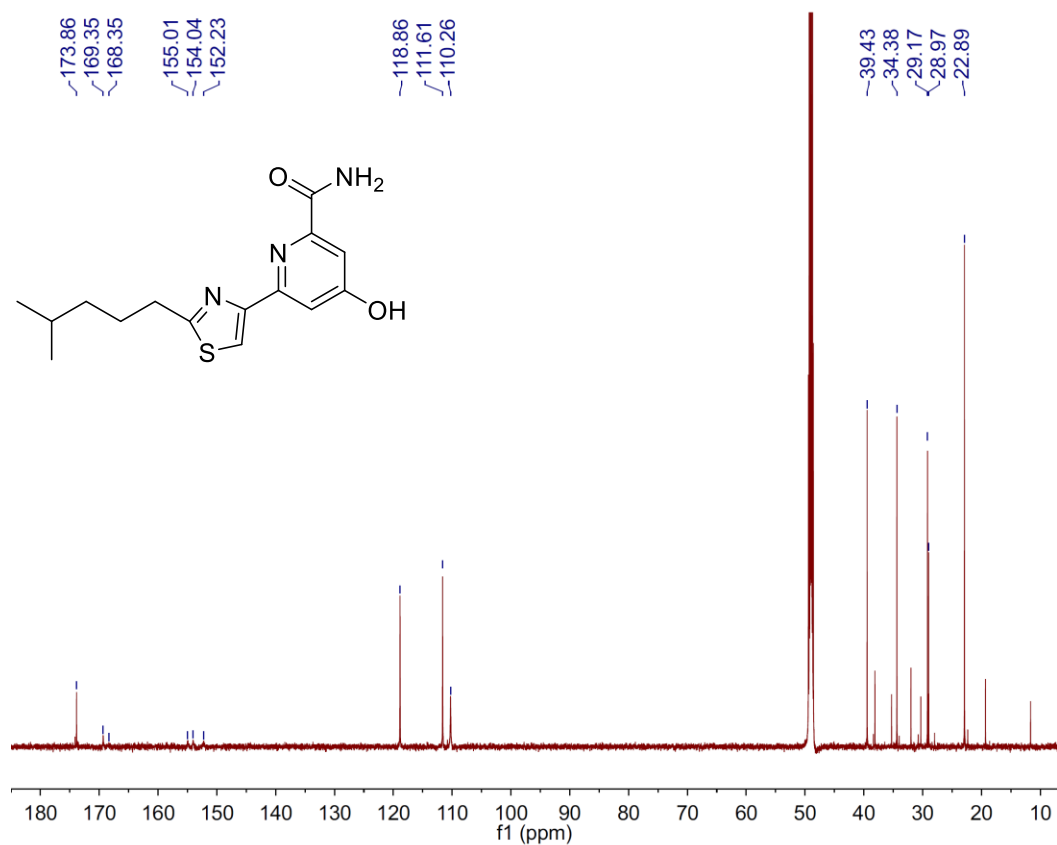

**Supplementary Figure 77.** <sup>13</sup>C-NMR (150 MHz) spectrum of compound **26** in MeOD.

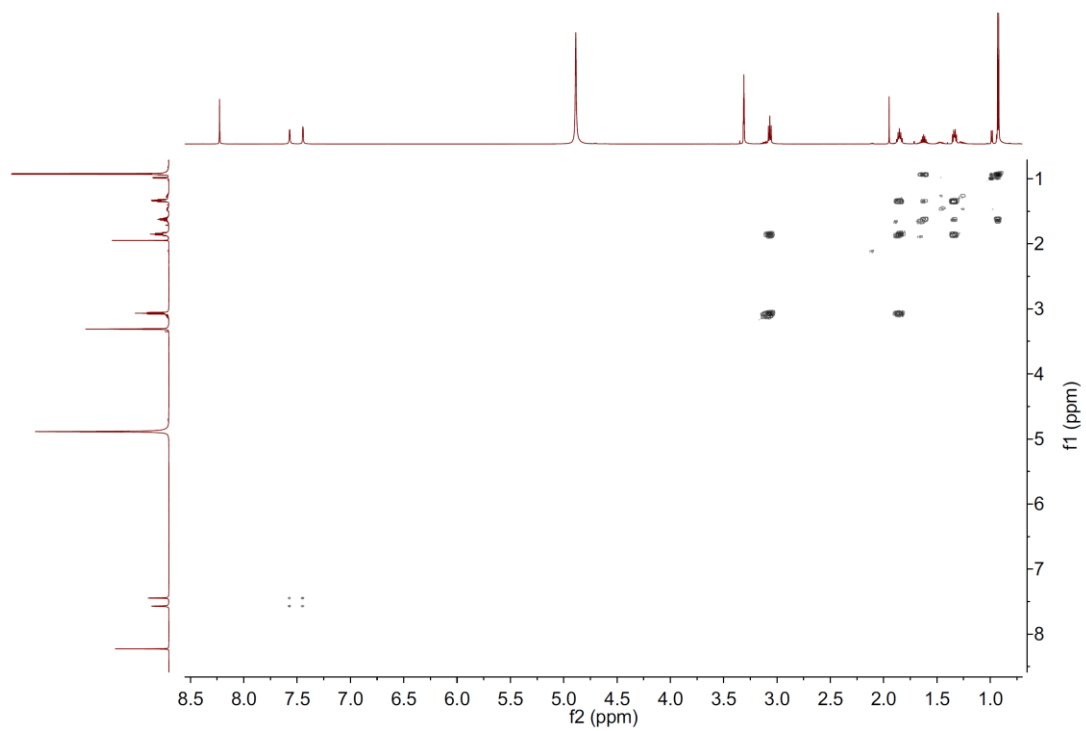

**Supplementary Figure 78.** <sup>1</sup>H-<sup>1</sup>H COSY (600 MHz) spectrum of compound **26** in MeOD.

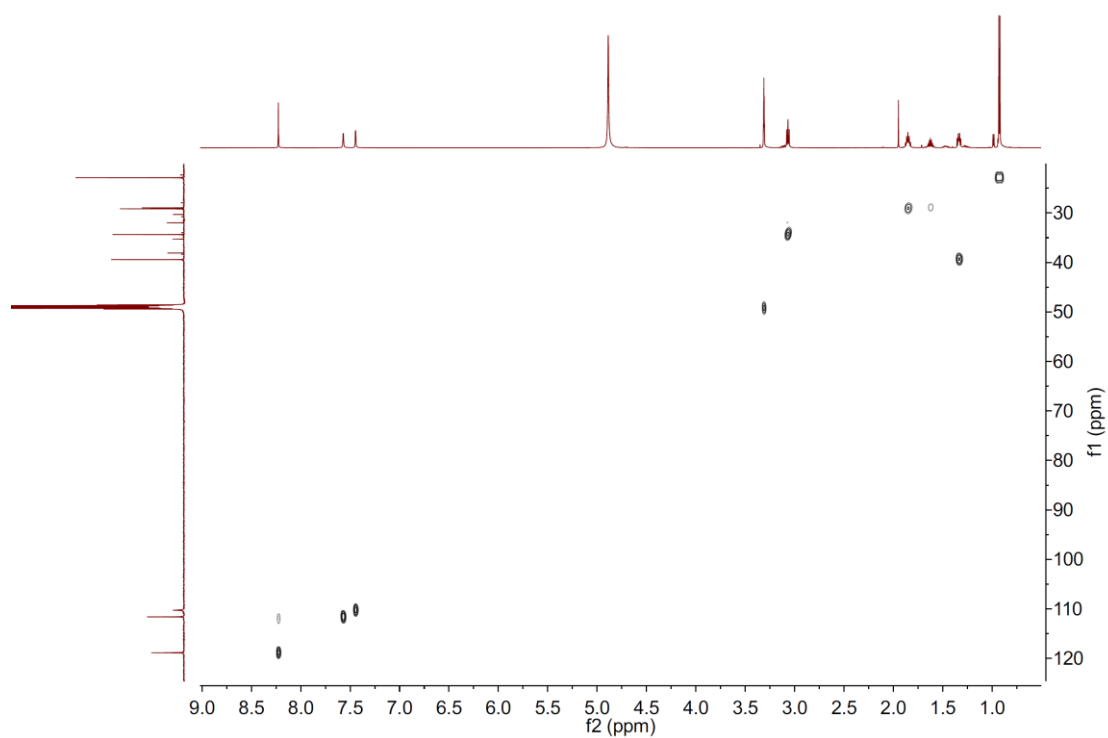

**Supplementary Figure 79.** HSQC (600 MHz) spectrum of compound **26** in MeOD.

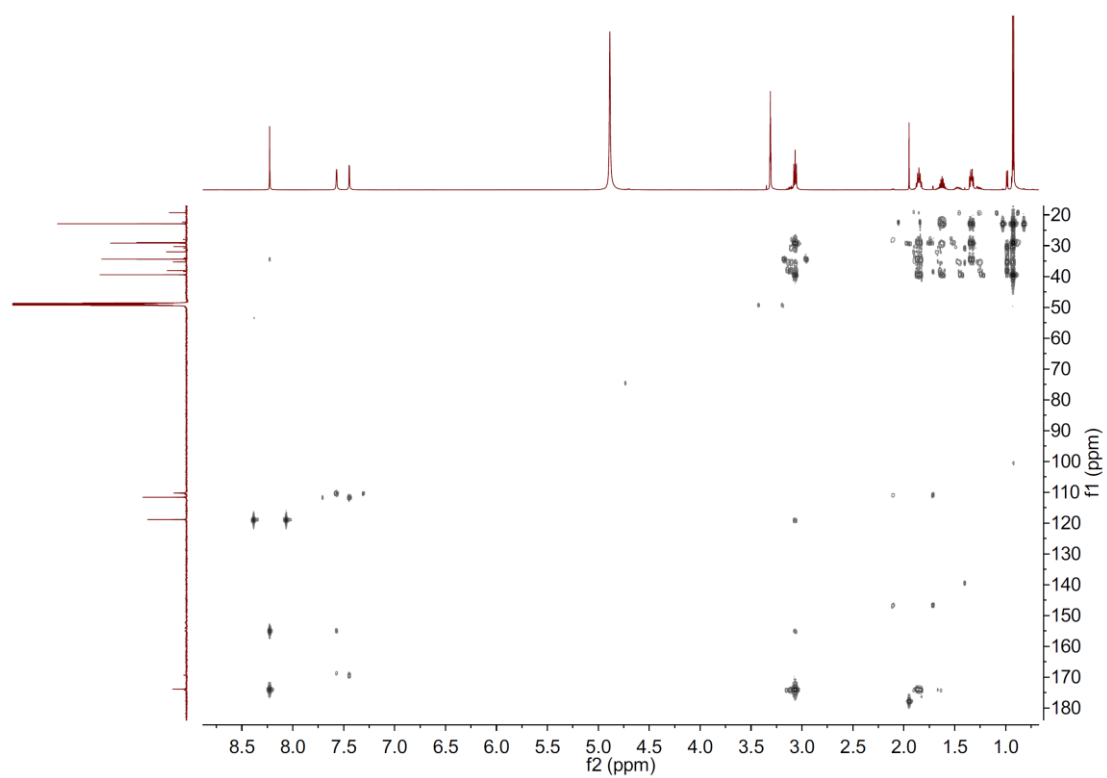

**Supplementary Figure 80.** HMBC (600 MHz) spectrum of compound **26** in MeOD.

User Spectra

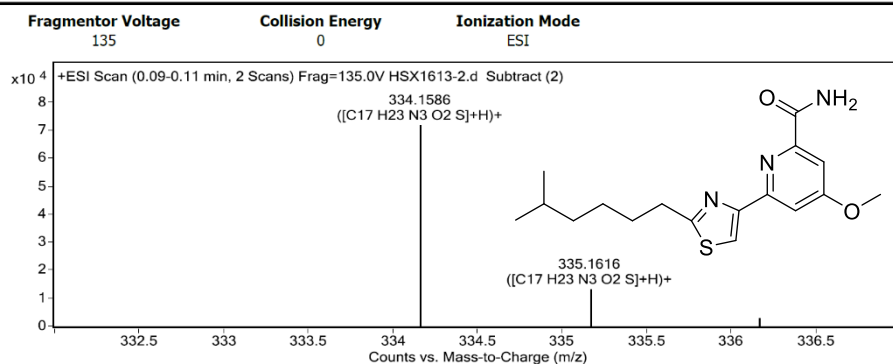

Supplementary Figure 81. HRESIMS spectrum of compound **32**.

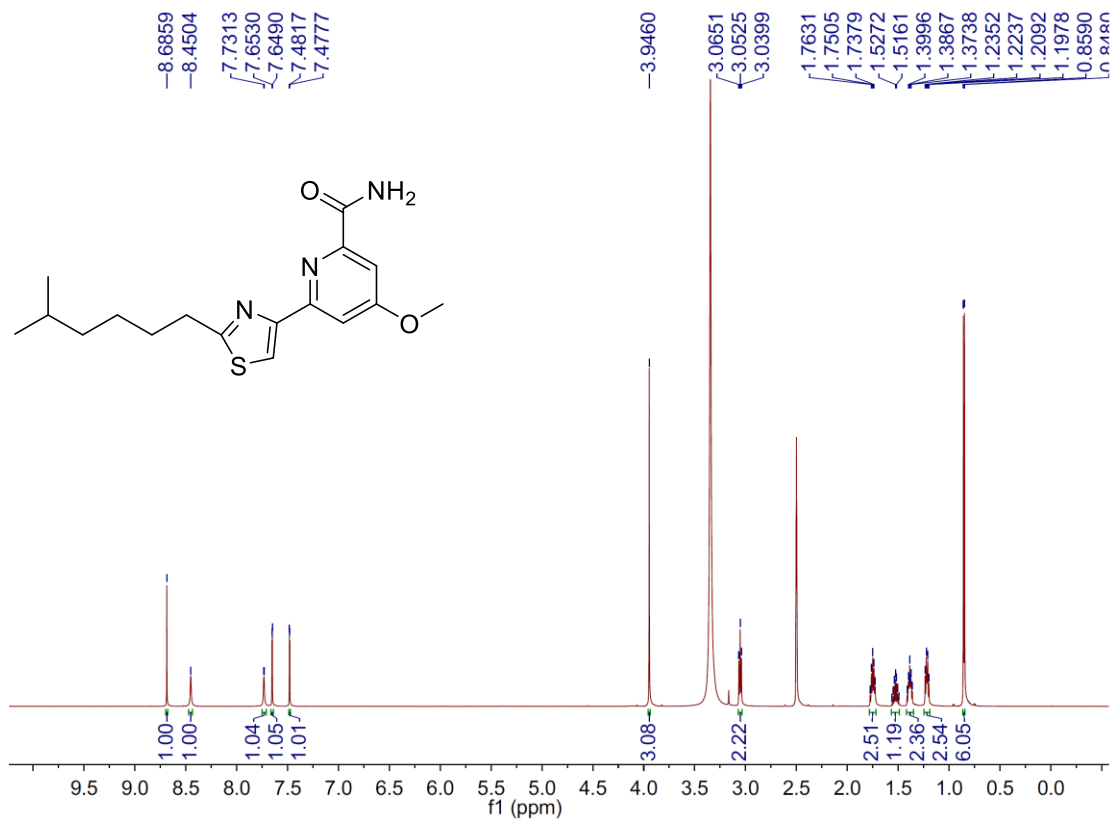

Supplementary Figure 82. <sup>1</sup>H-NMR (600 MHz) spectrum of compound **32** in DMSO-*d*<sub>6</sub>.

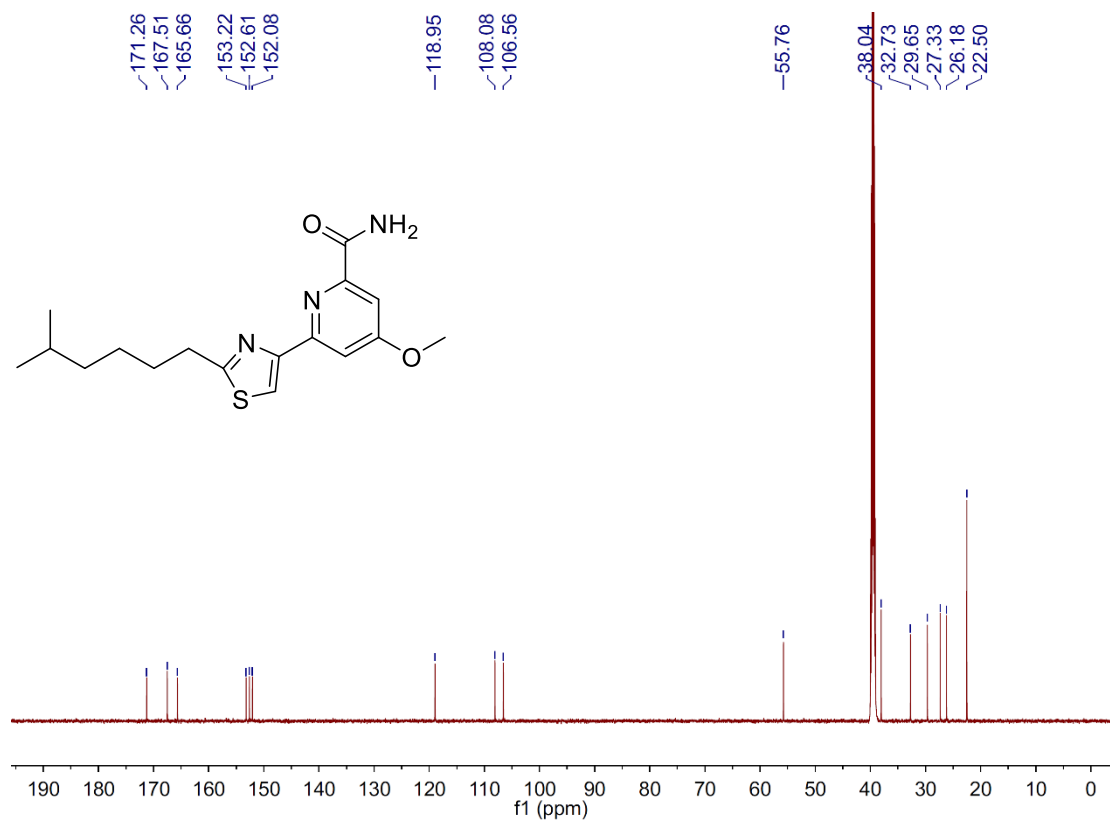

**Supplementary Figure 83.**  $^{13}\text{C-NMR}$  (150 MHz) spectrum of compound **32** in  $\text{DMSO-}d_6$ .

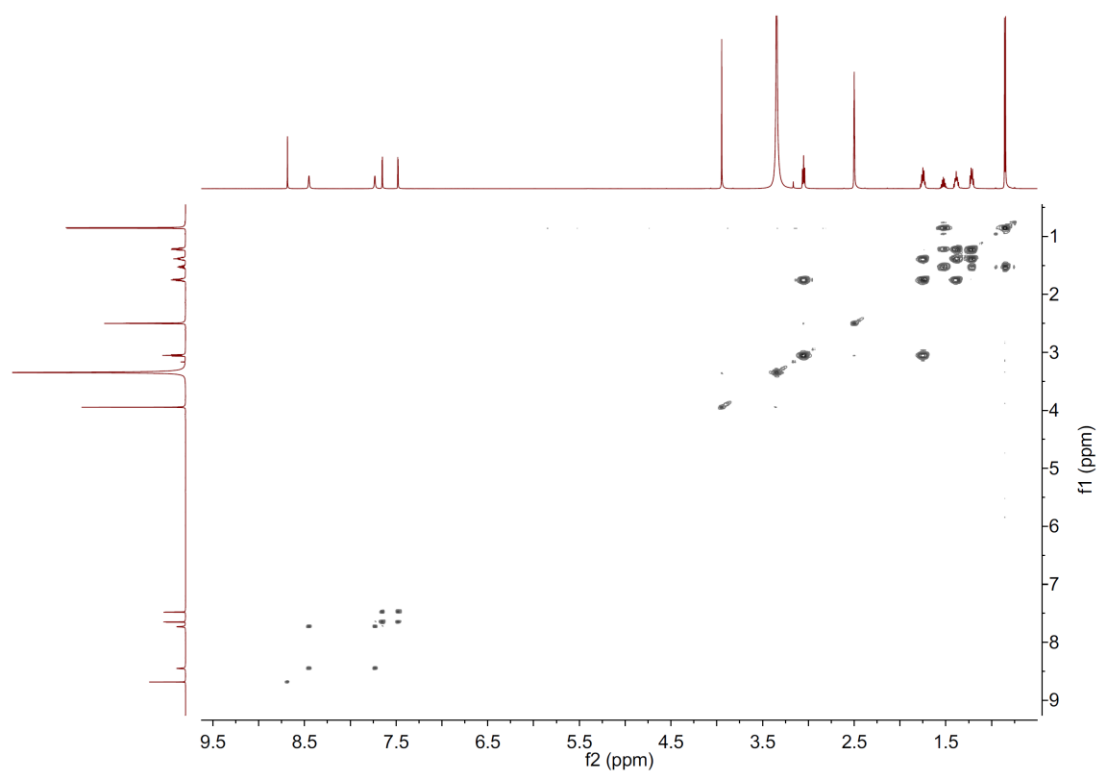

**Supplementary Figure 84.**  $^1\text{H-}^1\text{H}$  COSY (600 MHz) spectrum of compound **32** in  $\text{DMSO-}d_6$ .

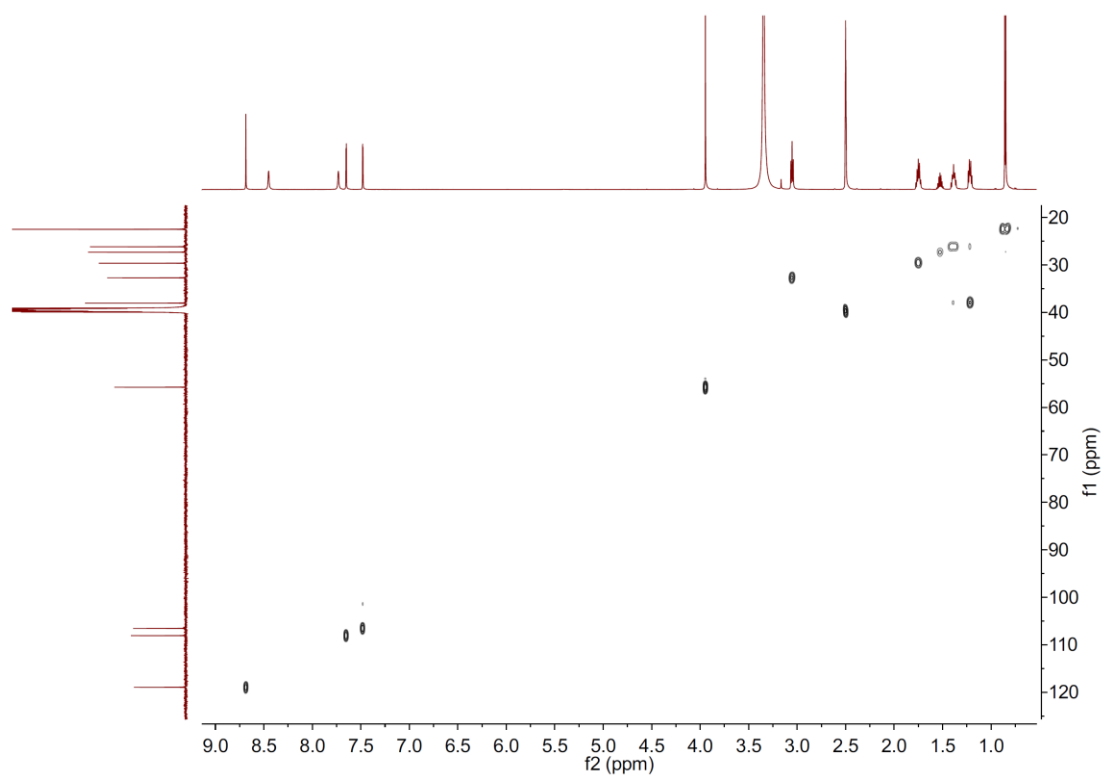

**Supplementary Figure 85.** HSQC (600 MHz) spectrum of compound **32** in DMSO- $d_6$ .

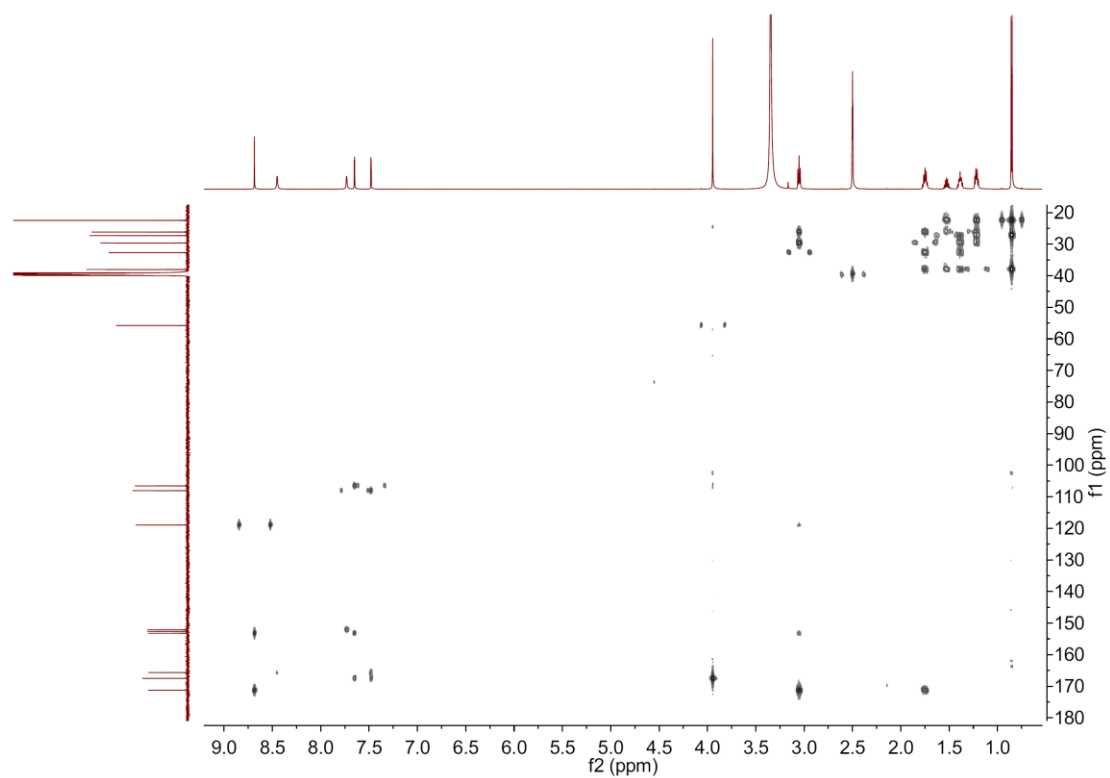

**Supplementary Figure 86.** HMBC (600 MHz) spectrum of compound **32** in DMSO- $d_6$ .

## User Spectra

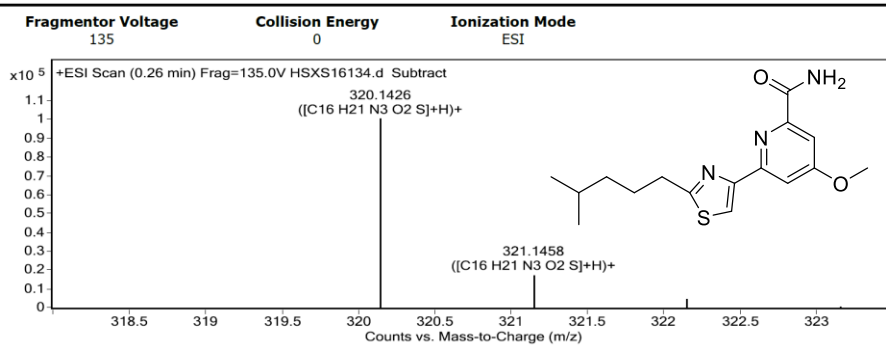

Supplementary Figure 87. HRESIMS spectrum of compound **33**.

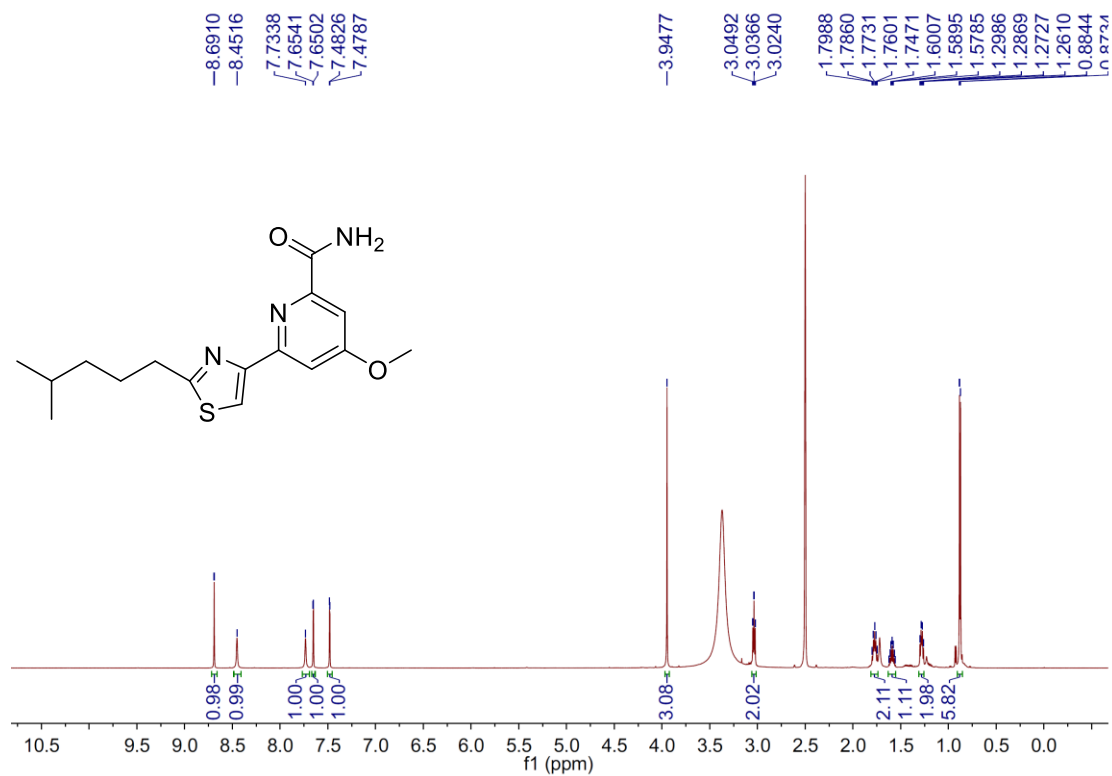

Supplementary Figure 88. <sup>1</sup>H-NMR (600 MHz) spectrum of compound **33** in DMSO-*d*<sub>6</sub>.

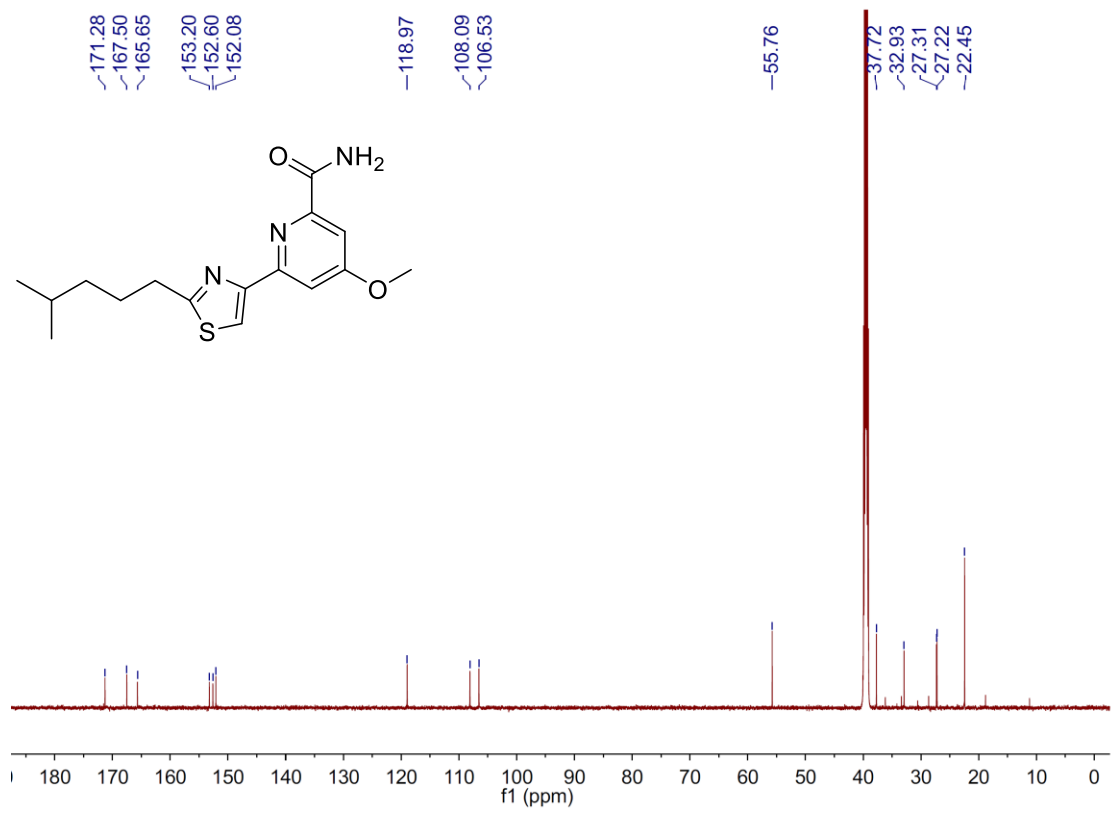

**Supplementary Figure 89.** <sup>13</sup>C-NMR (150 MHz) spectrum of compound 33 in DMSO-*d*<sub>6</sub>.

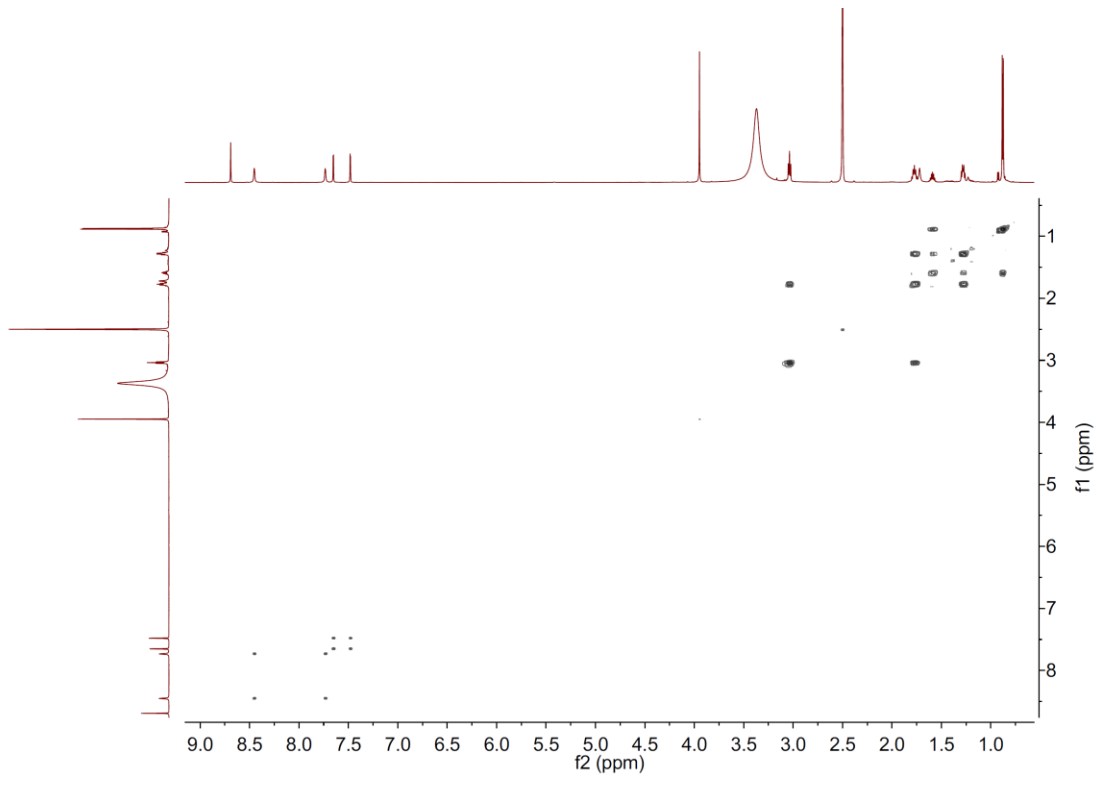

**Supplementary Figure 90.** <sup>1</sup>H-<sup>1</sup>H COSY (600 MHz) spectrum of compound 33 in DMSO-*d*<sub>6</sub>.



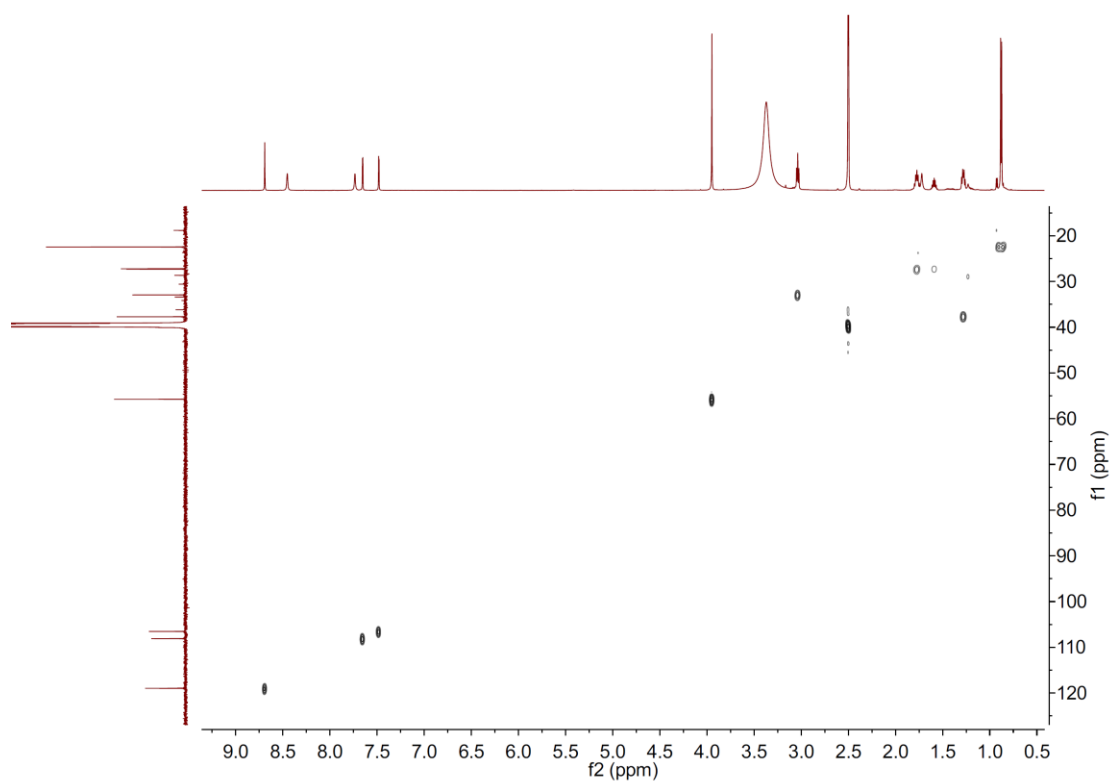

**Supplementary Figure 91.** HSQC (600 MHz) spectrum of compound **33** in DMSO- $d_6$ .

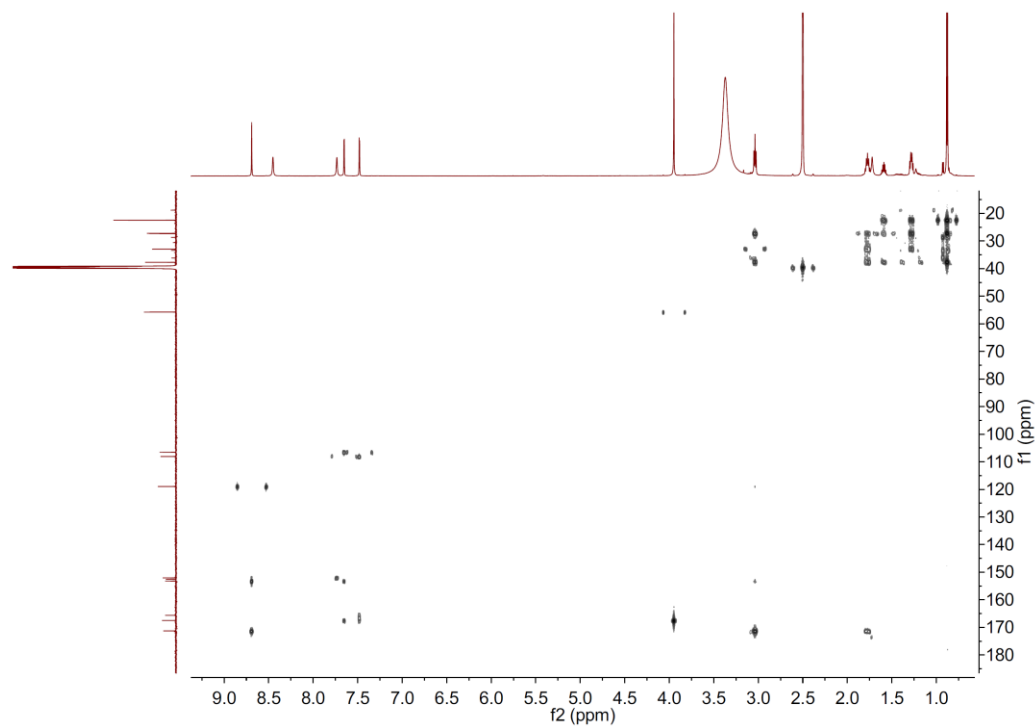

**Supplementary Figure 92.** HMBC (600 MHz) spectrum of compound **33** in DMSO- $d_6$ .

Event#: 1 MS(E+) Ret. Time : 0.413 -> 0.533 Scan# : 63 -> 81

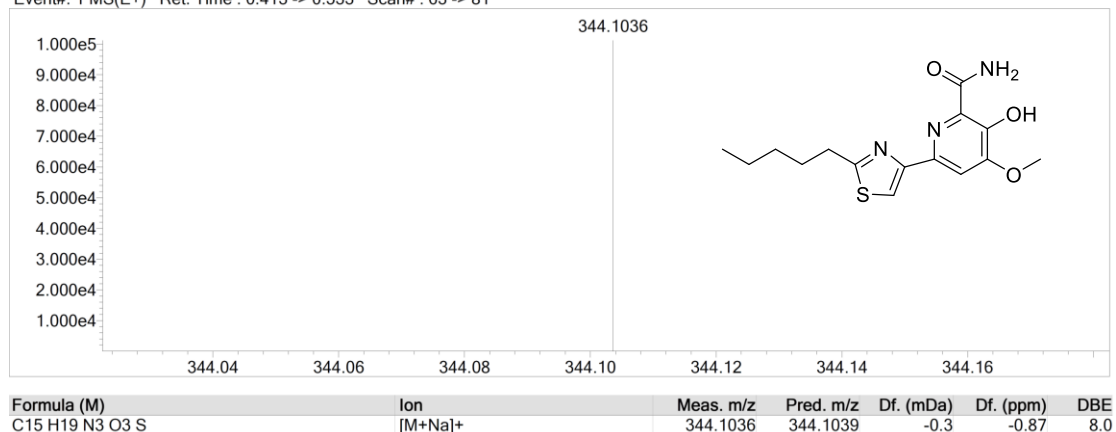

Supplementary Figure 93. HRESIMS spectrum of compound 35.

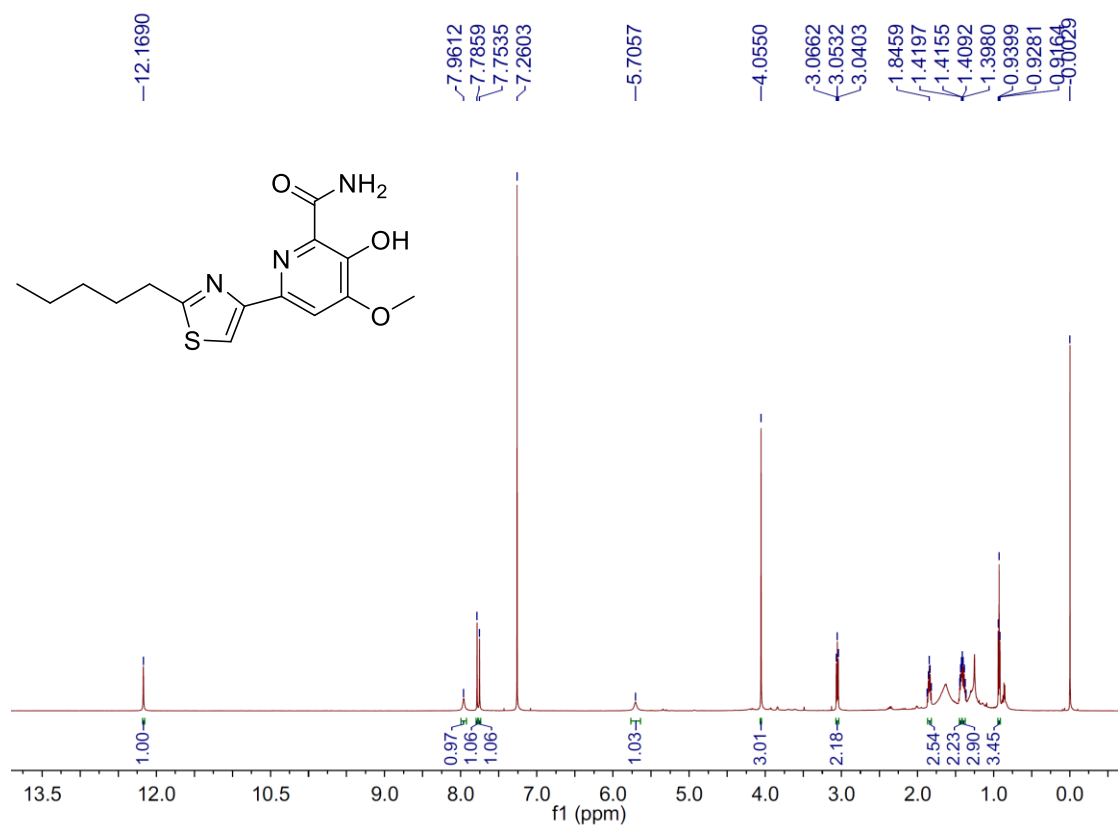

Supplementary Figure 94. <sup>1</sup>H-NMR (600 MHz) spectrum of compound 35 in CDCl<sub>3</sub>.

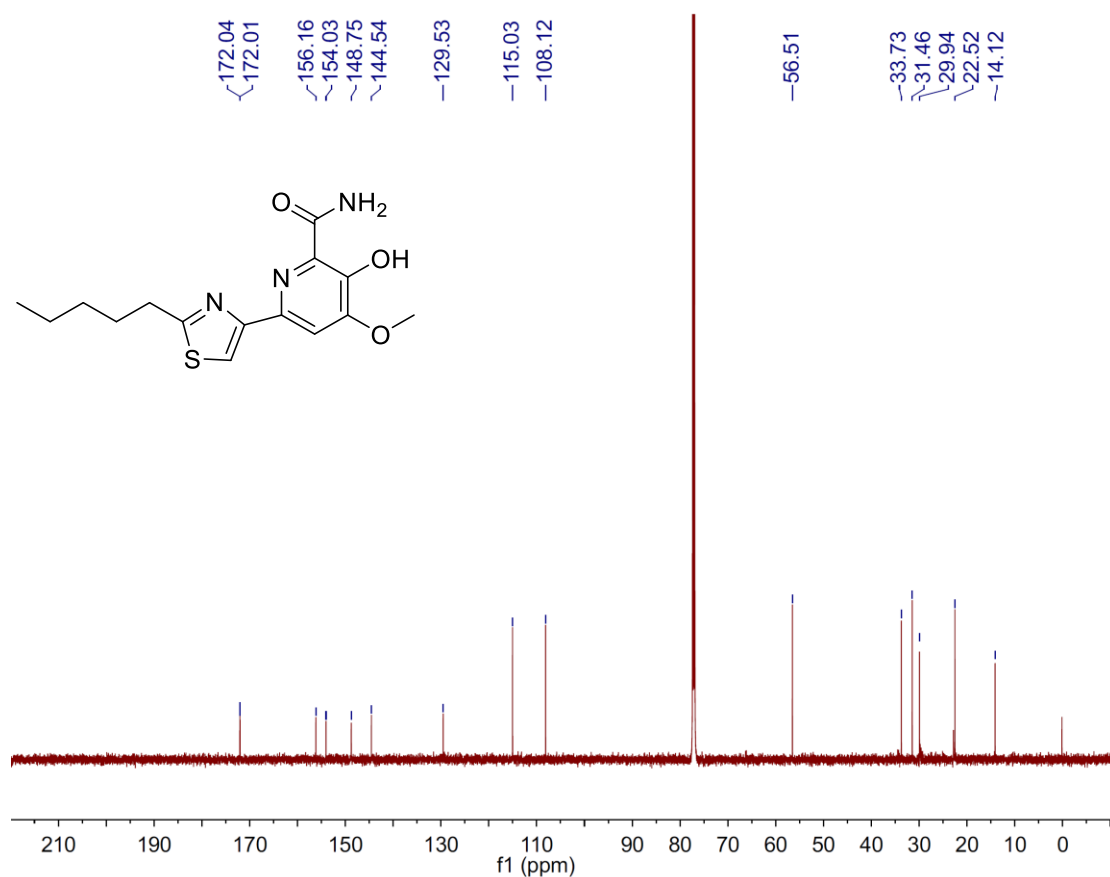

**Supplementary Figure 95.**  $^{13}\text{C-NMR}$  (150 MHz) spectrum of compound 35 in  $\text{CDCl}_3$ .

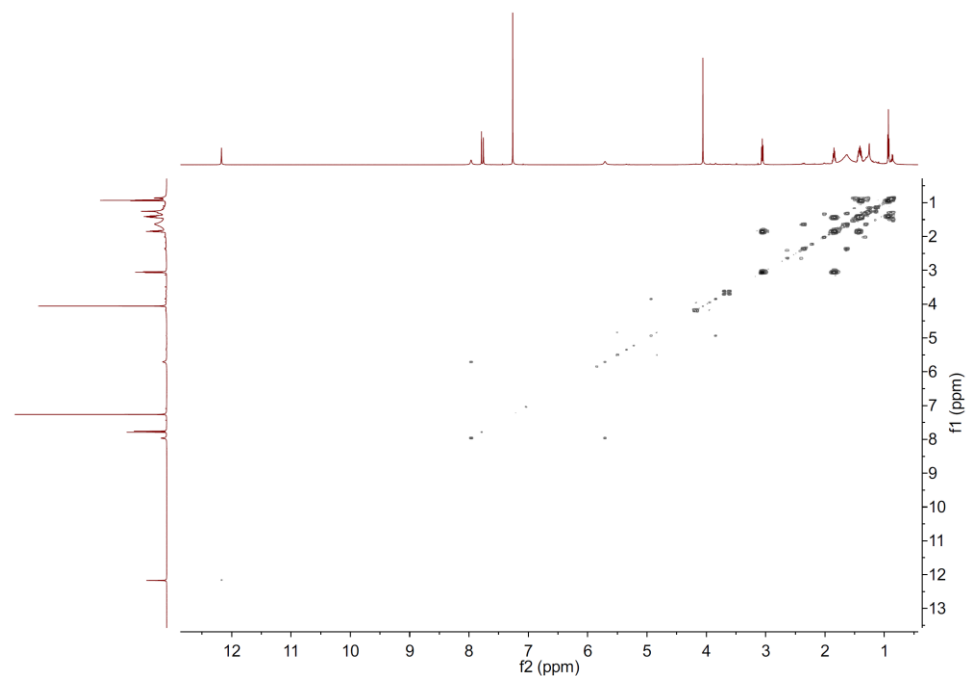

**Supplementary Figure 96.**  $^1\text{H-}^1\text{H}$  COSY (600 MHz) spectrum of compound 35 in  $\text{CDCl}_3$ .

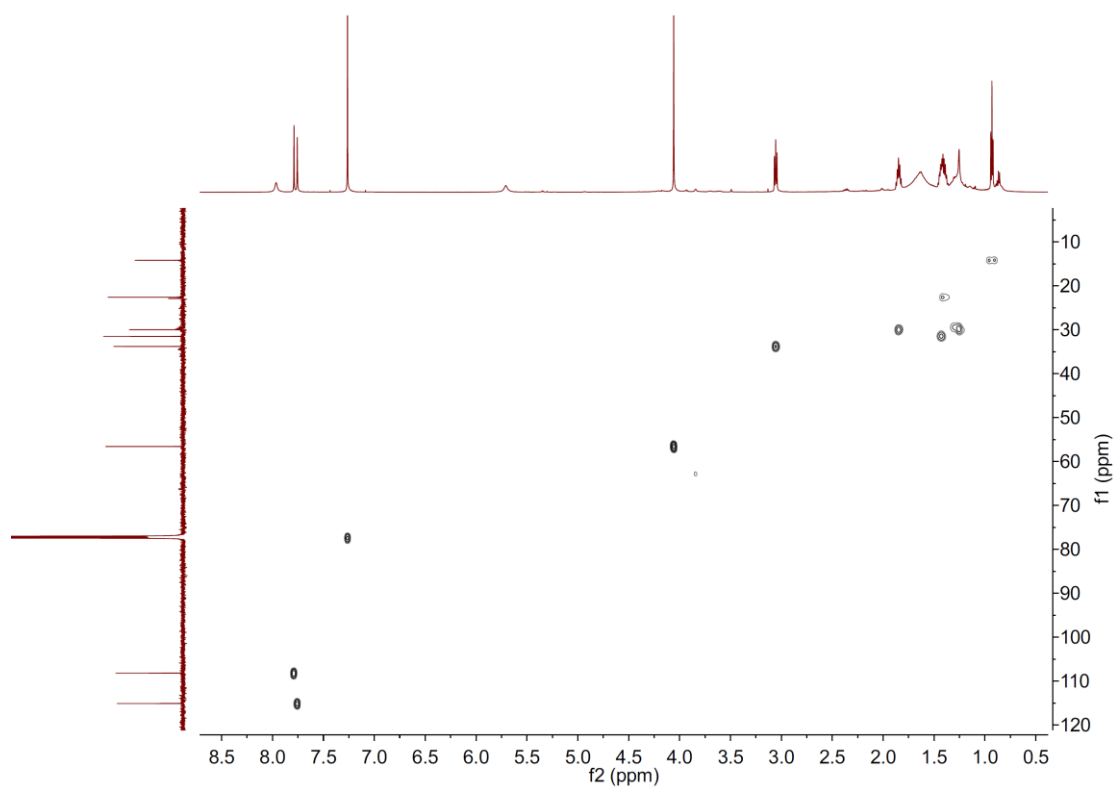

**Supplementary Figure 97.** HSQC (600 MHz) spectrum of compound **35** in  $\text{CDCl}_3$ .

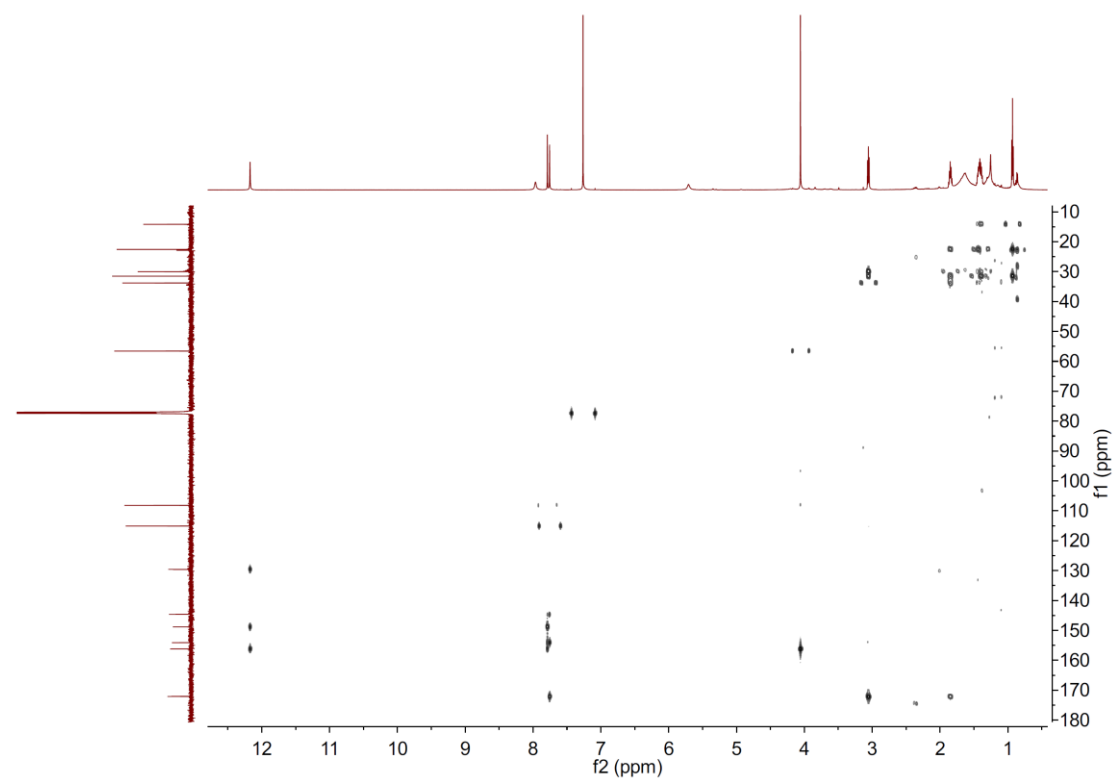

**Supplementary Figure 98.** HMBC (600 MHz) spectrum of compound **35** in  $\text{CDCl}_3$ .

## User Spectra

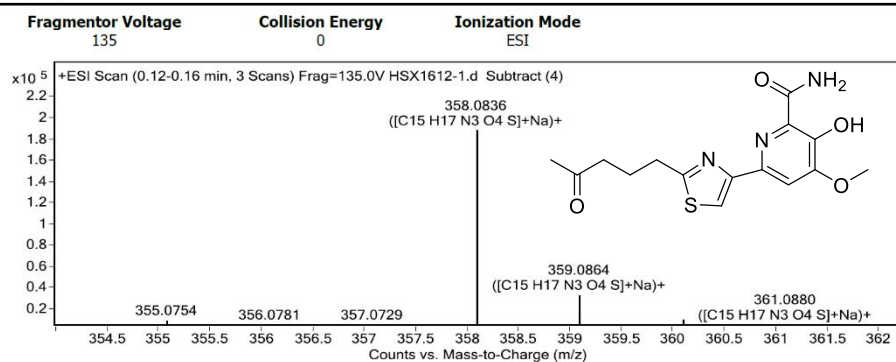

Supplementary Figure 99. HRESIMS spectrum of compound 36.

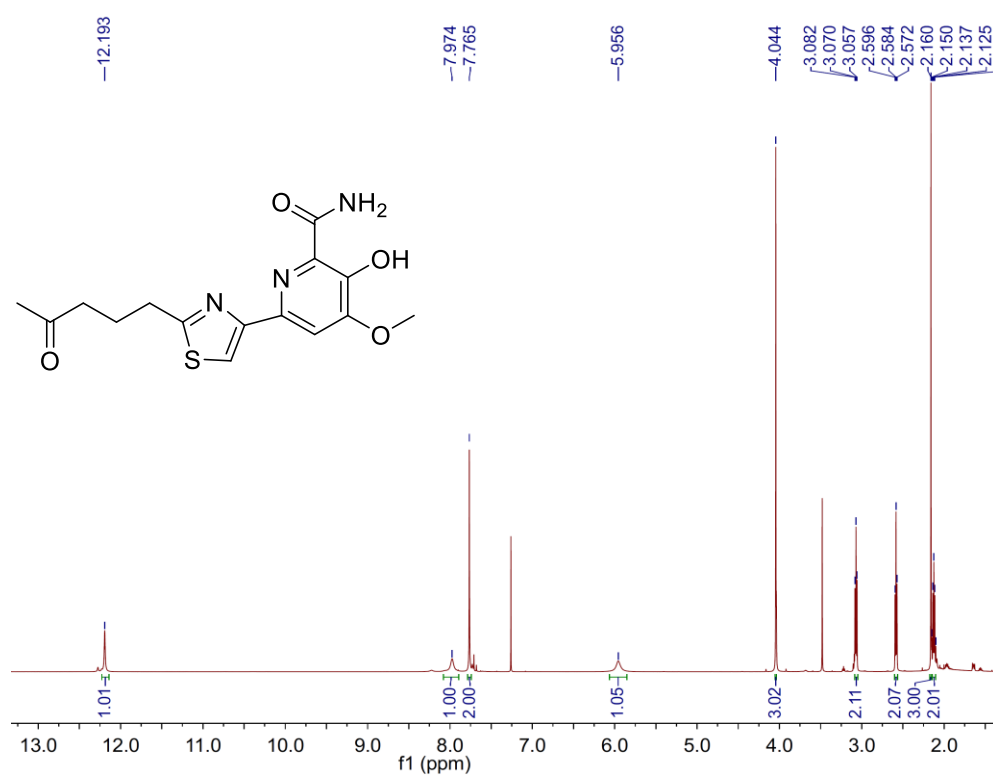

Supplementary Figure 100. <sup>1</sup>H-NMR (600 MHz) spectrum of compound 36 in CDCl<sub>3</sub>.

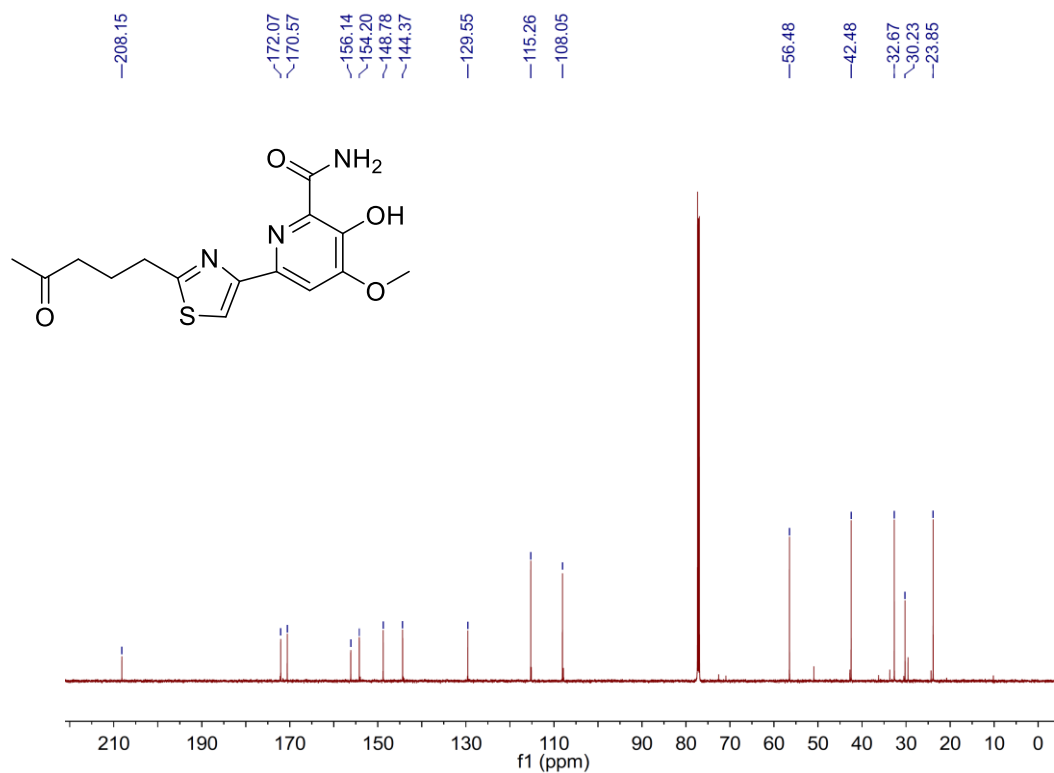

**Supplementary Figure 101.**  $^{13}\text{C-NMR}$  (150 MHz) spectrum of compound **36** in  $\text{CDCl}_3$ .

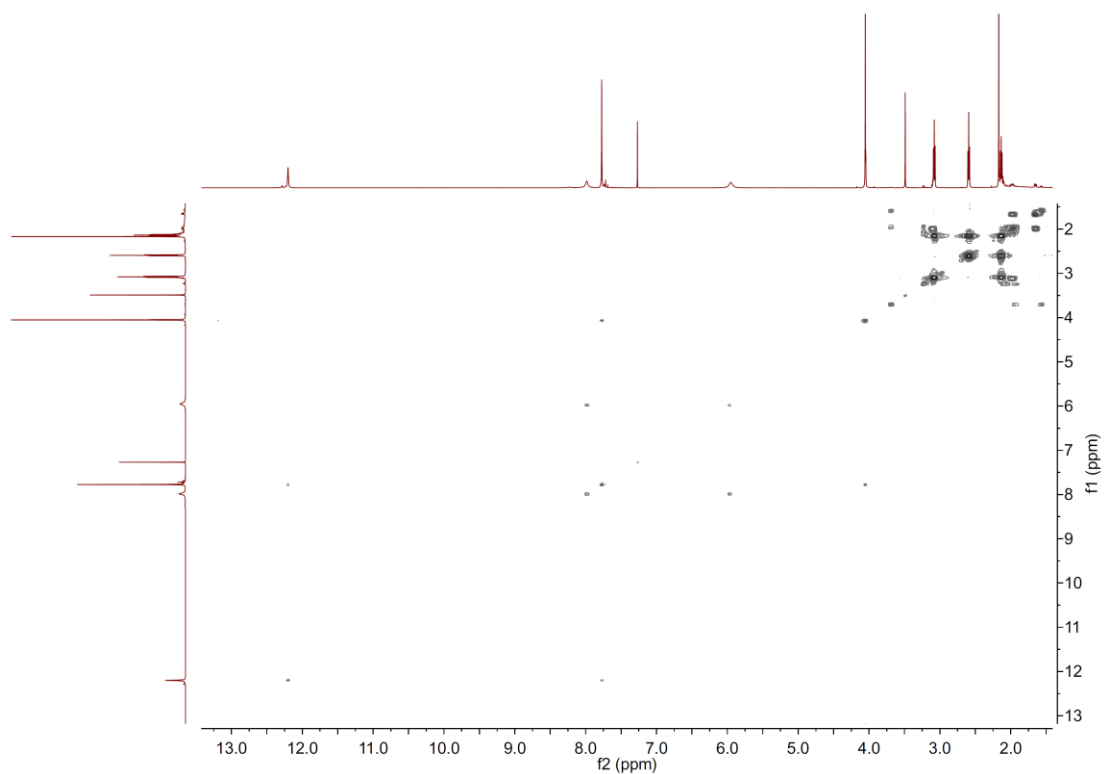

**Supplementary Figure 102.**  $^1\text{H-}^1\text{H}$  COSY (600 MHz) spectrum of compound **36** in  $\text{CDCl}_3$ .

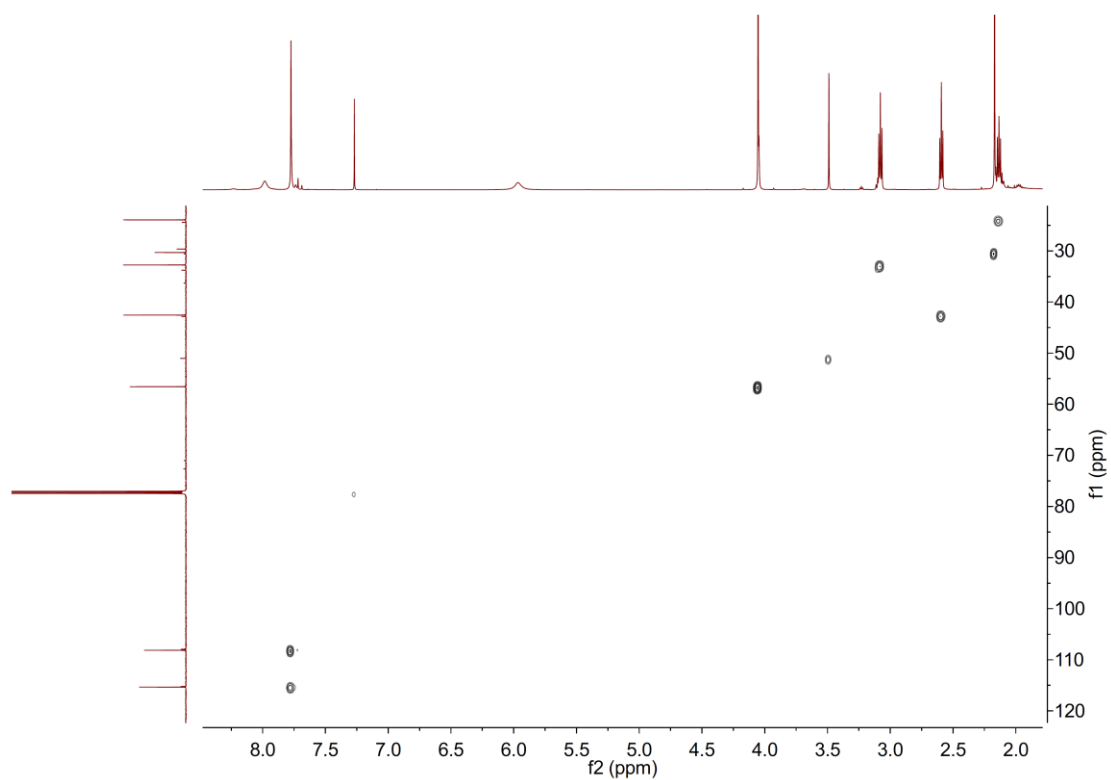

**Supplementary Figure 103.** HSQC (600 MHz) spectrum of compound **36** in  $\text{CDCl}_3$ .

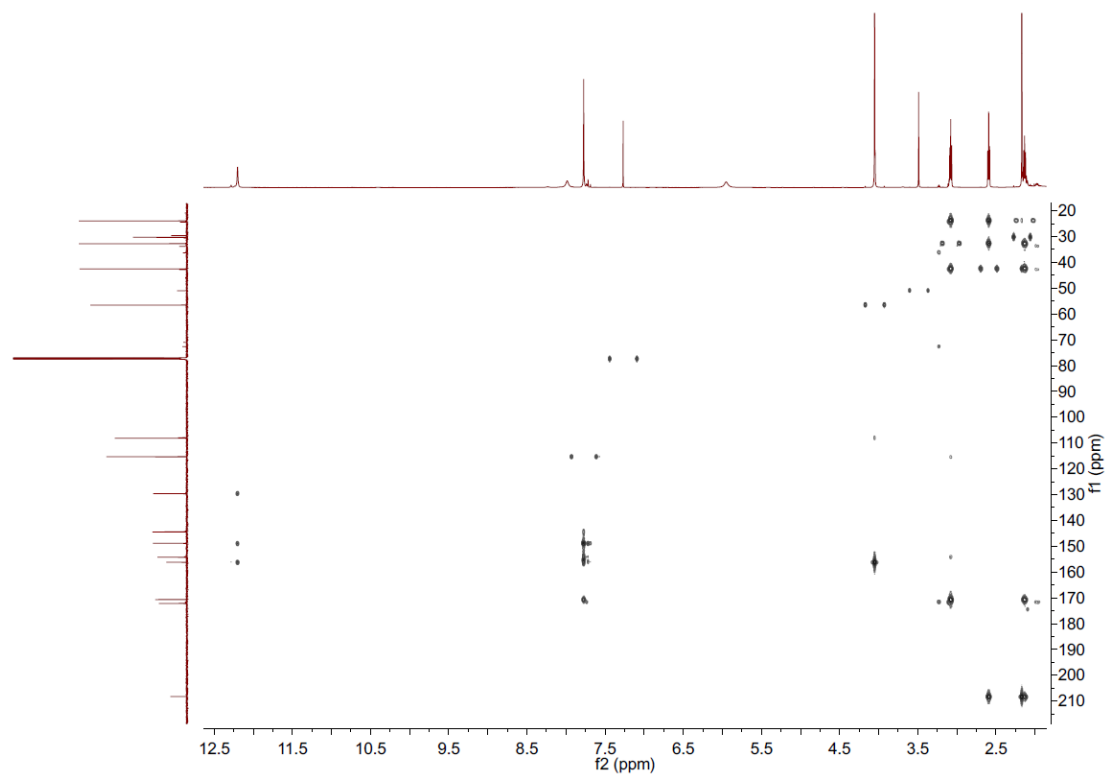

**Supplementary Figure 104.** HMBC (600 MHz) spectrum of compound **36** in  $\text{CDCl}_3$ .

## User Spectra

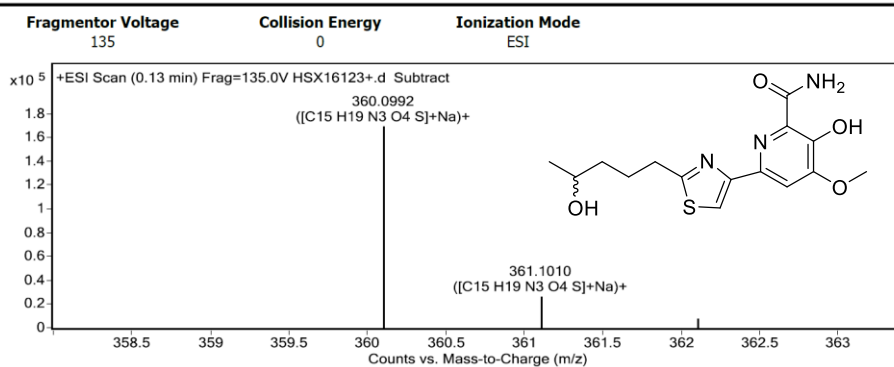

Supplementary Figure 105. HRESIMS spectrum of compound **37**.

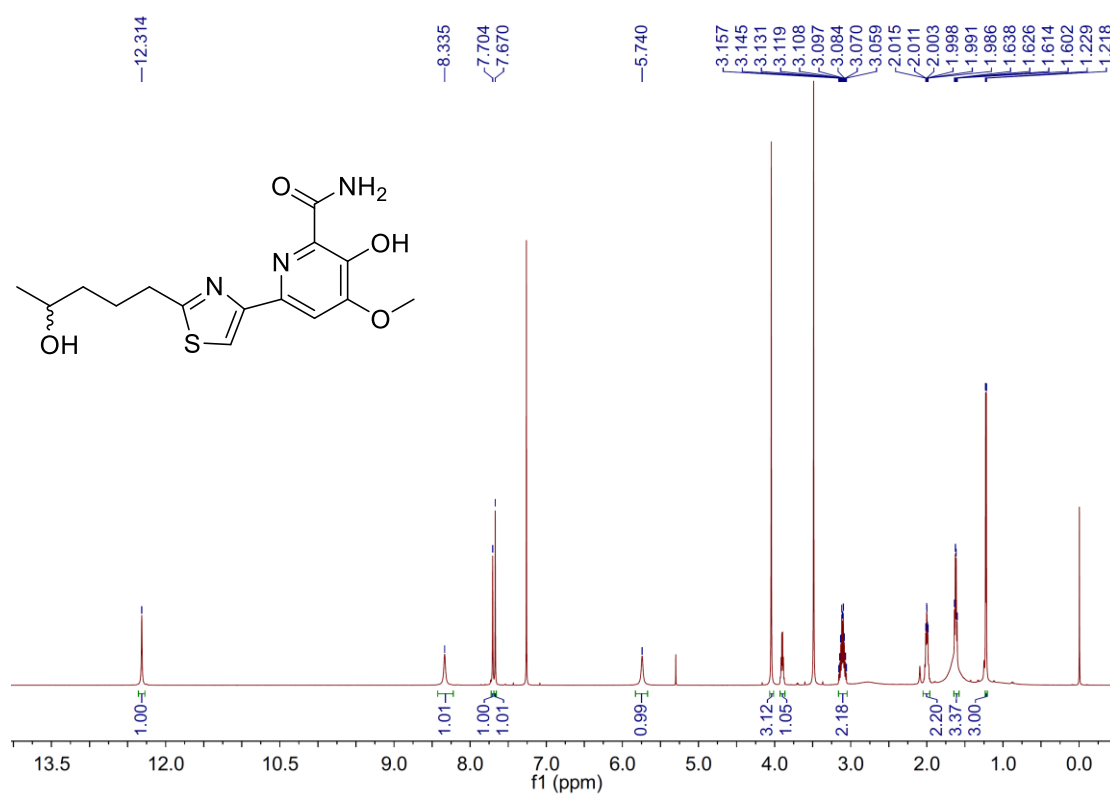

Supplementary Figure 106. <sup>1</sup>H-NMR (600 MHz) spectrum of compound **37** in CDCl<sub>3</sub>.



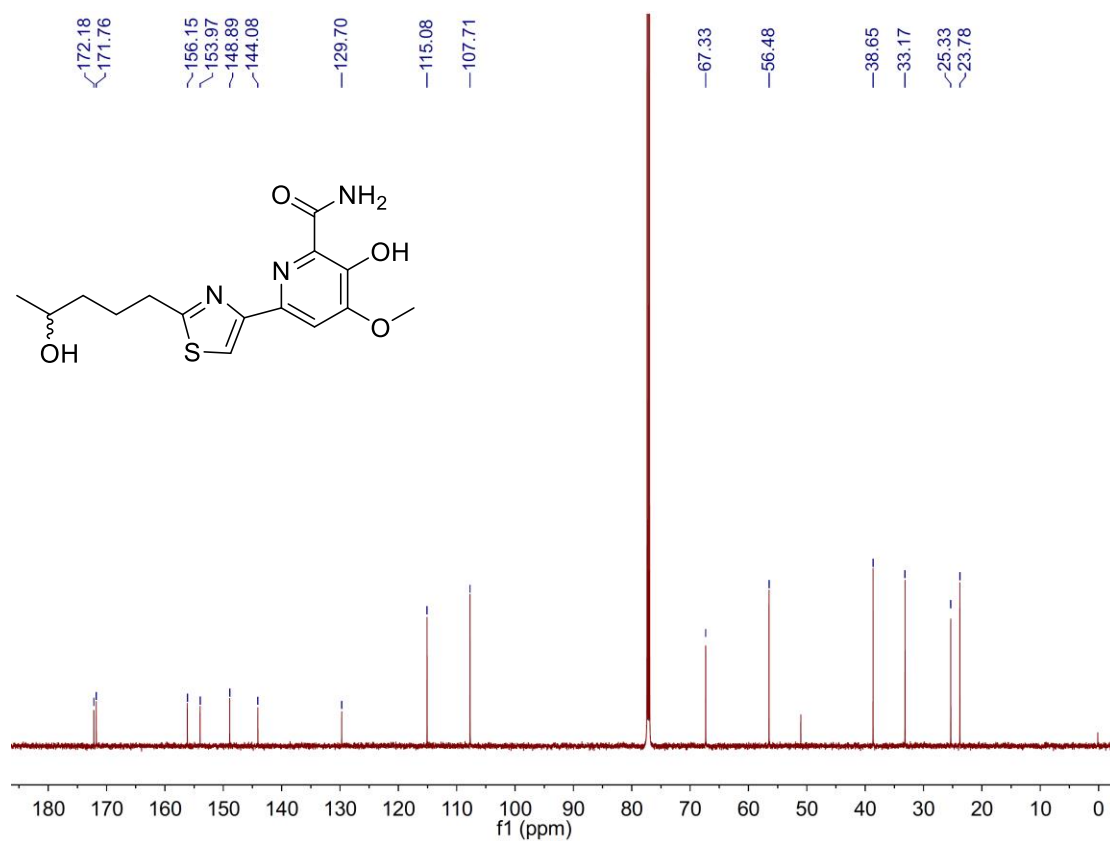

**Supplementary Figure 107.**  $^{13}\text{C-NMR}$  (150 MHz) spectrum of compound **37** in  $\text{CDCl}_3$ .

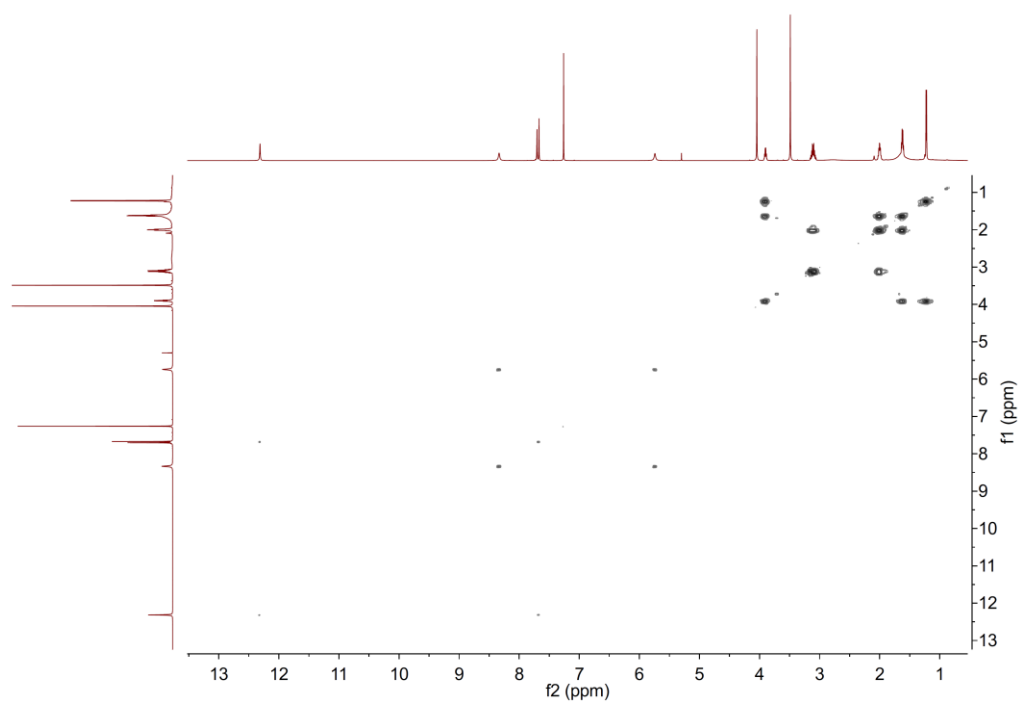

**Supplementary Figure 108.**  $^1\text{H-}^1\text{H}$  COSY (600 MHz) spectrum of compound **37** in  $\text{CDCl}_3$ .

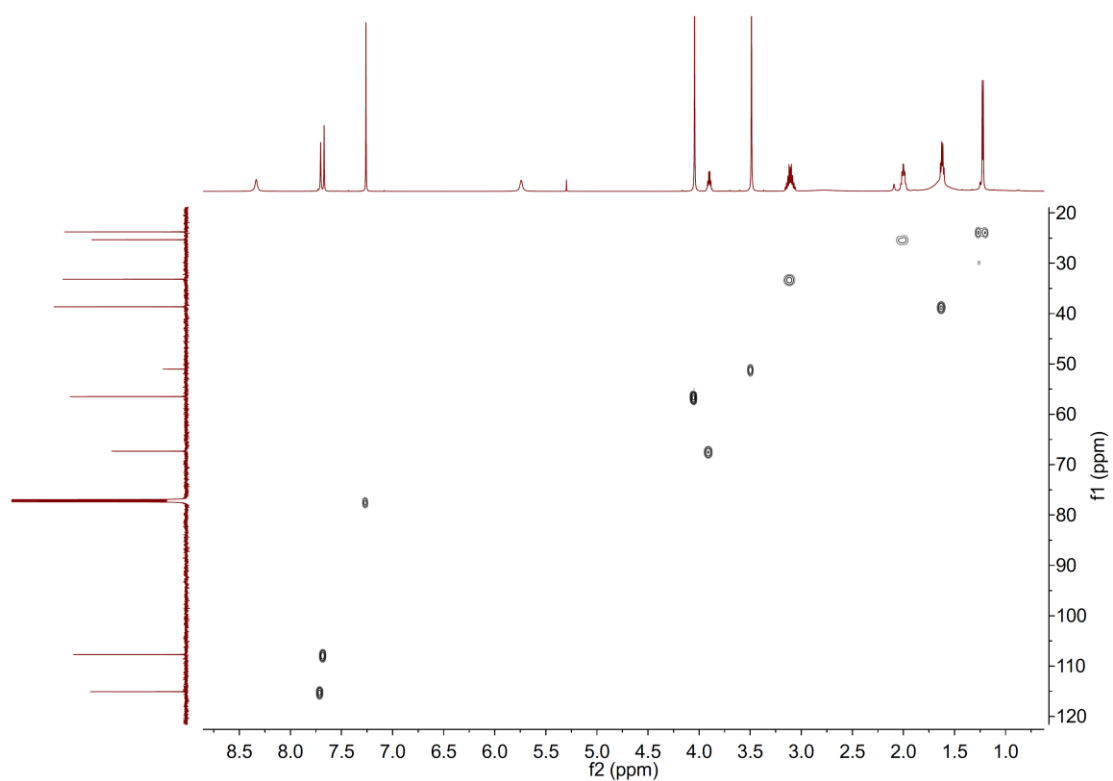

**Supplementary Figure 109.** HSQC (600 MHz) spectrum of compound **37** in CDCl<sub>3</sub>.

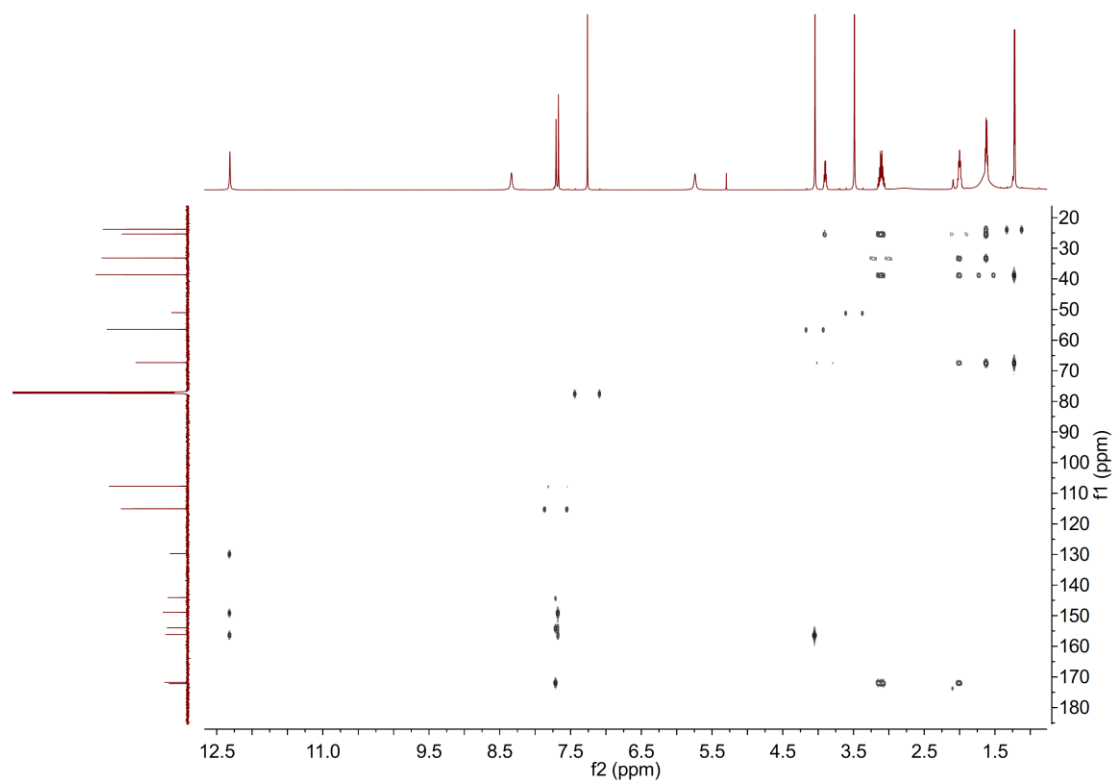

**Supplementary Figure 110.** HMBC (600 MHz) spectrum of compound **37** in CDCl<sub>3</sub>.

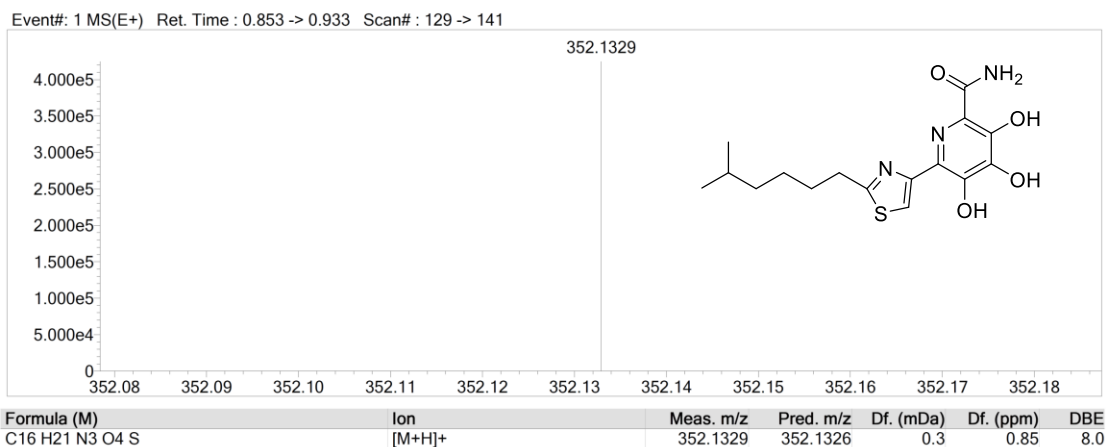

**Supplementary Figure 111.** HRESIMS spectrum of compound **28**.

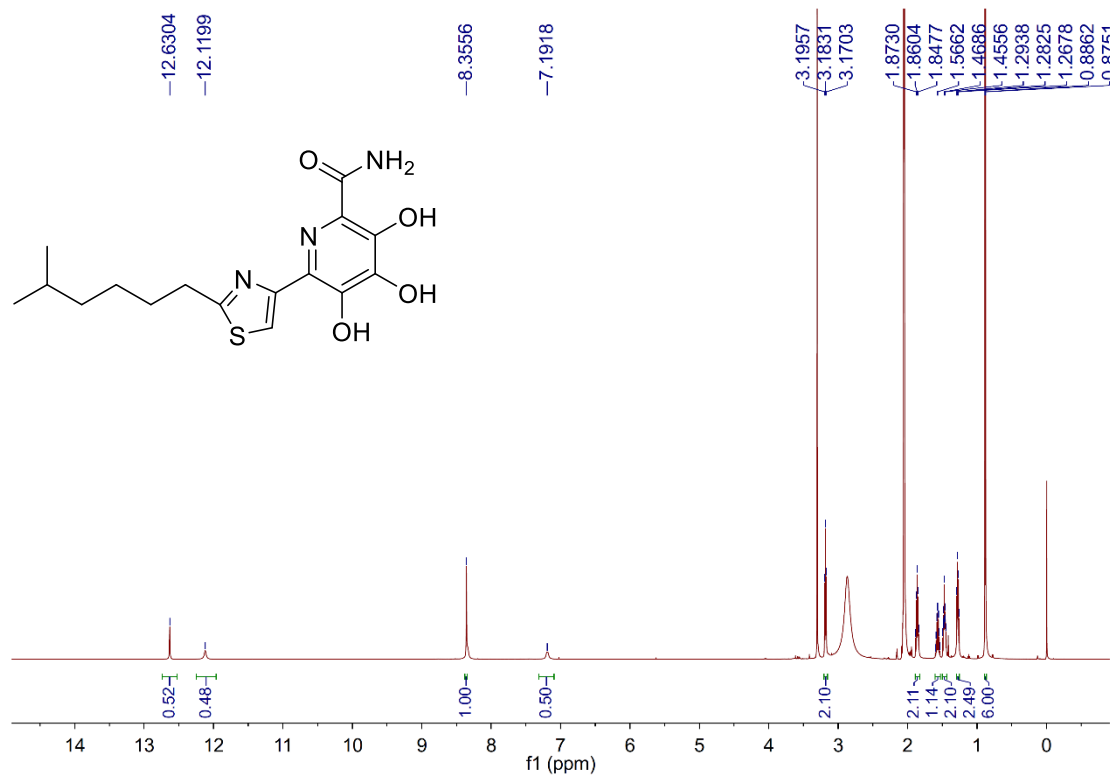

**Supplementary Figure 112.** <sup>1</sup>H-NMR (600 MHz) spectrum of compound **28** in Acetone-*d*<sub>6</sub>.

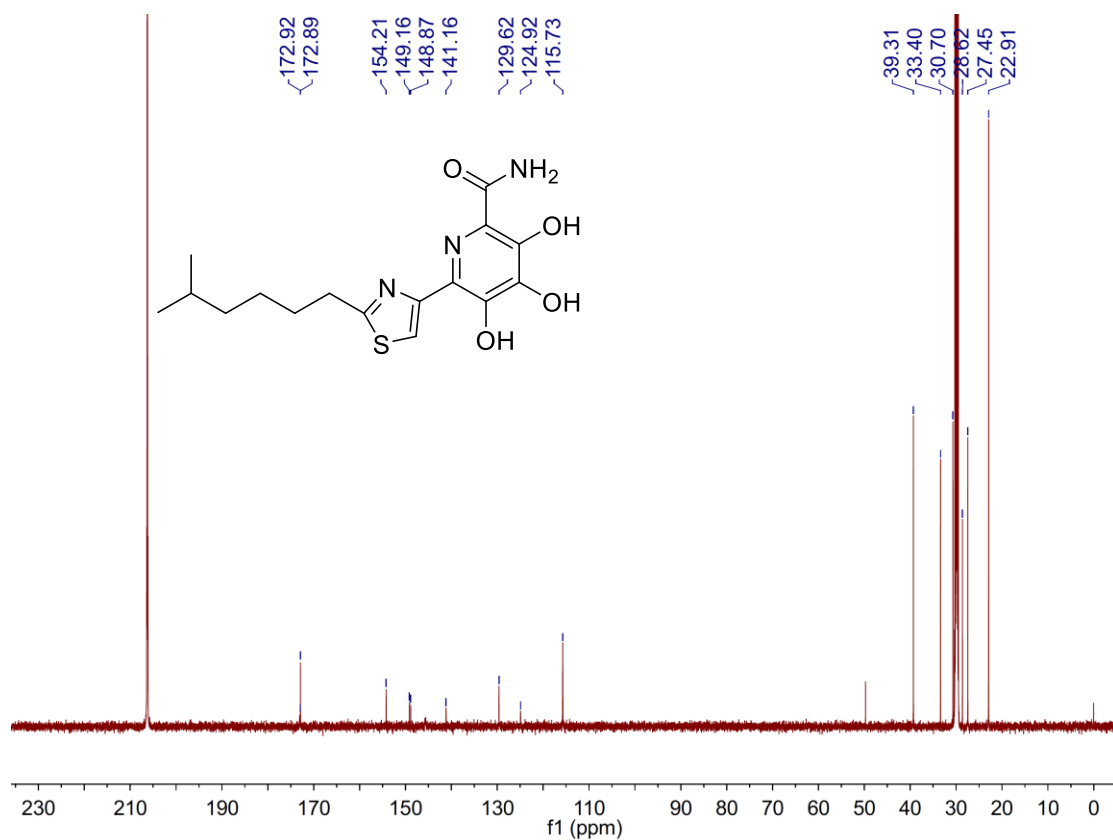

**Supplementary Figure 113.**  $^{13}\text{C-NMR}$  (150 MHz) spectrum of compound **28** in Acetone- $d_6$ .

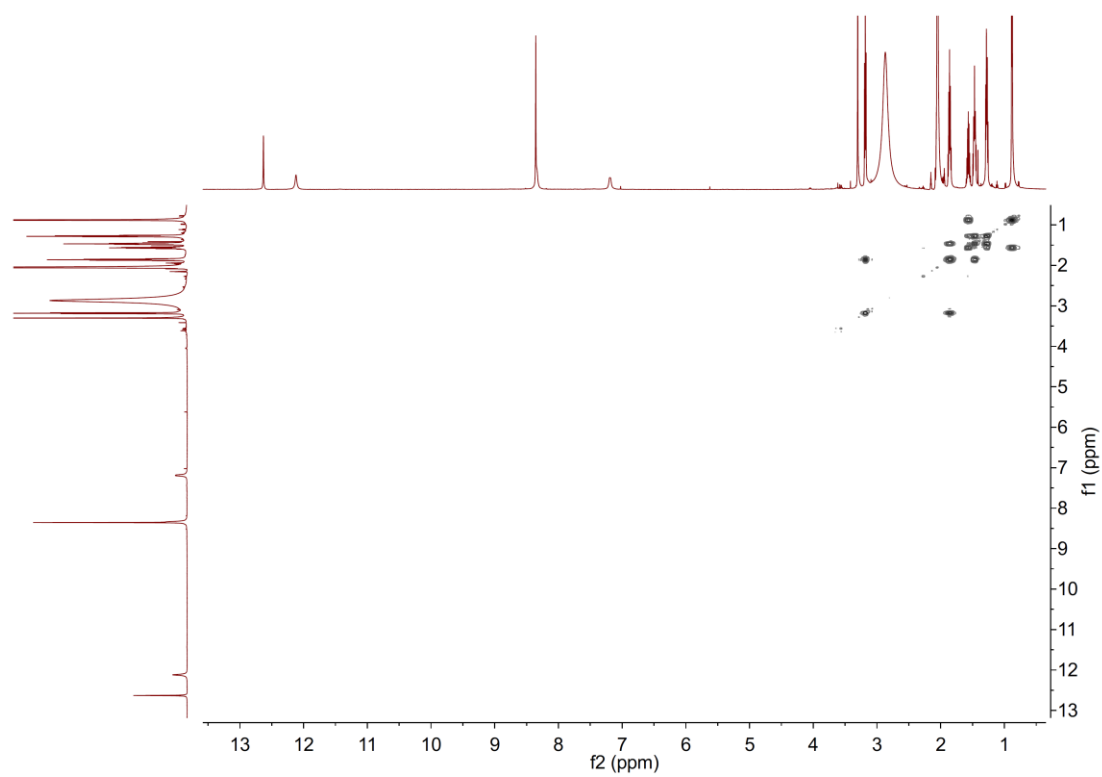

**Supplementary Figure 114.**  $^1\text{H-NMR}$  (600 MHz) COSY spectrum of compound **28** in Acetone- $d_6$ .

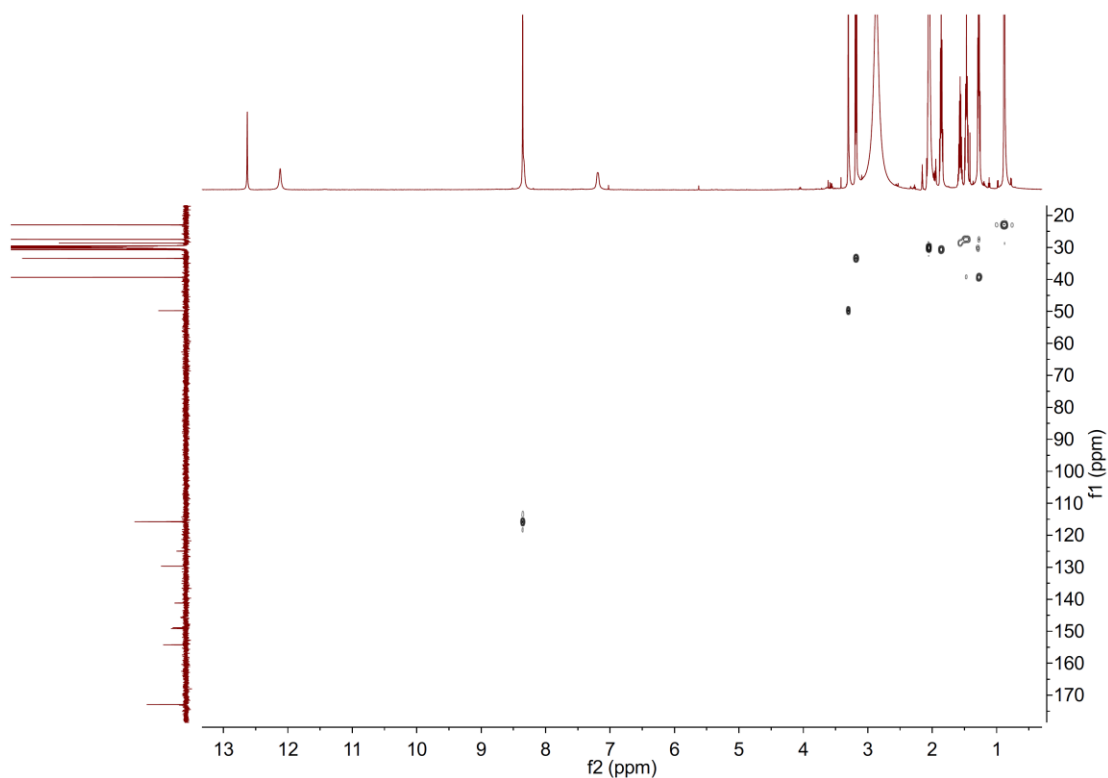

**Supplementary Figure 115.** HSQC (600 MHz) spectrum of compound **28** in Acetone- $d_6$ .

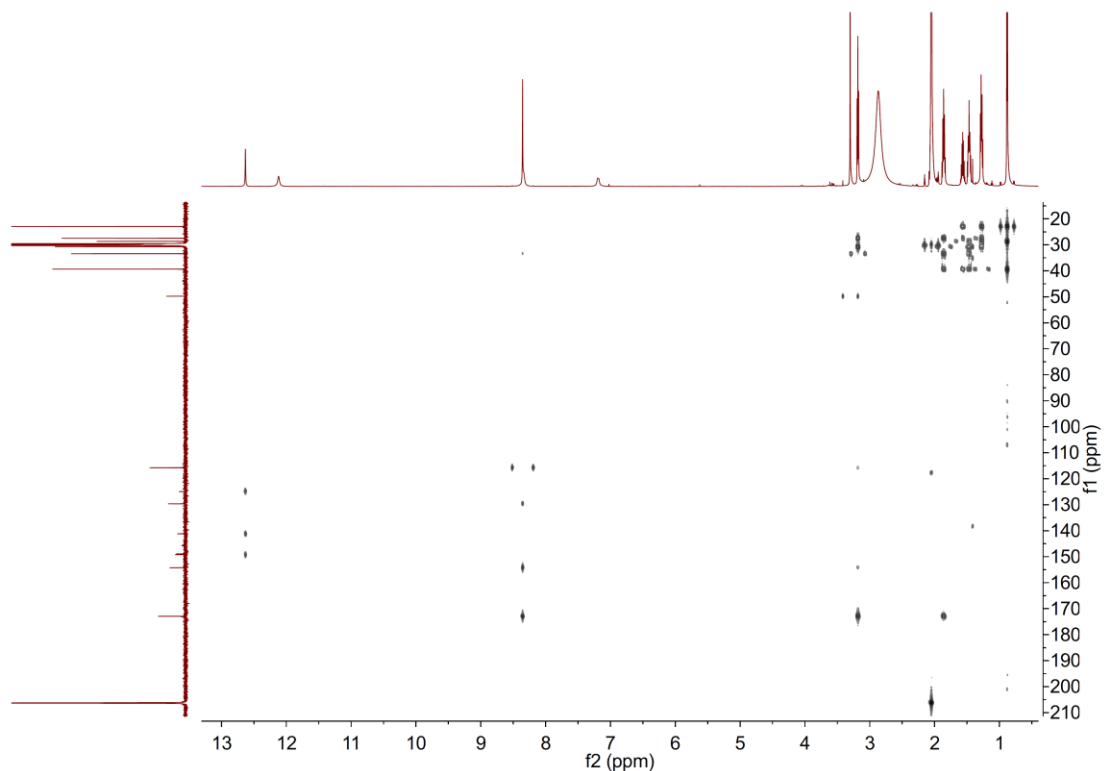

**Supplementary Figure 116.** HMBC (600 MHz) spectrum of compound **28** in Acetone- $d_6$ .

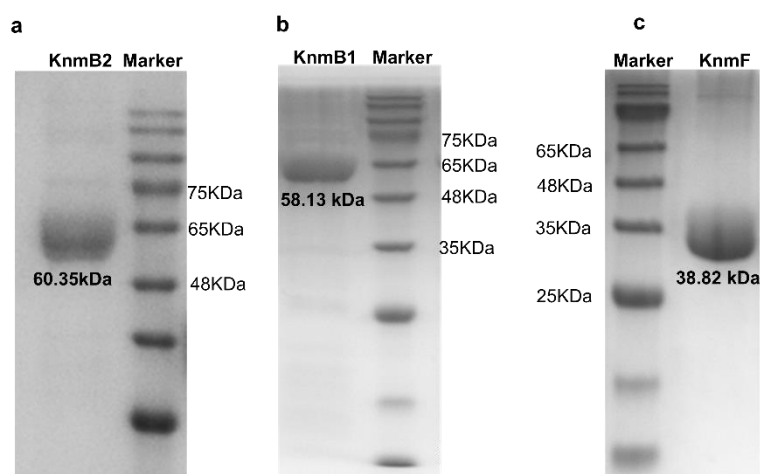

**Supplementary Figure 117.** SDS-PAGE analysis of proteins. **(a)** KnmB2 (recombinant KnmB2 fused with thioredoxin, His-tag, a thrombin site, a S-Tag and an enterokinase site, calculated molecular mass: 60.35 kDa). **(b)** KnmB1 (recombinant KnmB1 fused with thioredoxin, His-tag, a thrombin site, a S-Tag and an enterokinase site, calculated molecular mass: 58.13 kDa). **(c)** KnmF (recombinant KnmF fused with His-tag, calculated molecular mass: 38.82 kDa). A representative result of  $n = 3$  independent experiments is shown.

#### User Spectra

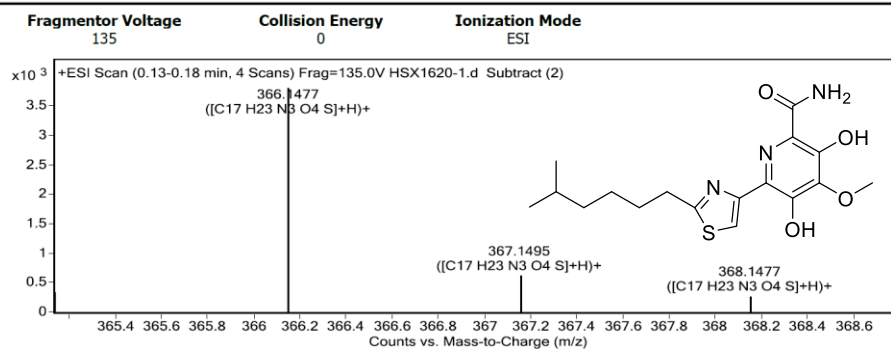

**Supplementary Figure 118.** HRESIMS spectrum of compound 30.

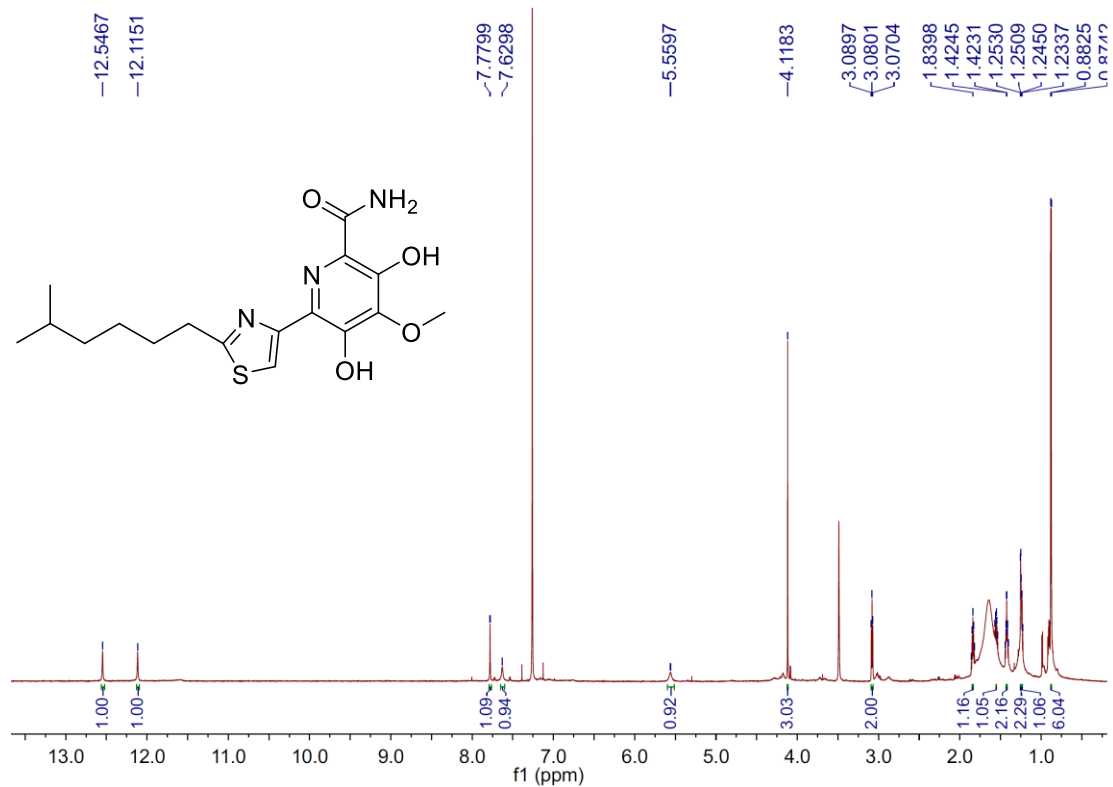

Supplementary Figure 119. <sup>1</sup>H-NMR (800 MHz) spectrum of compound 30 in CDCl<sub>3</sub>.

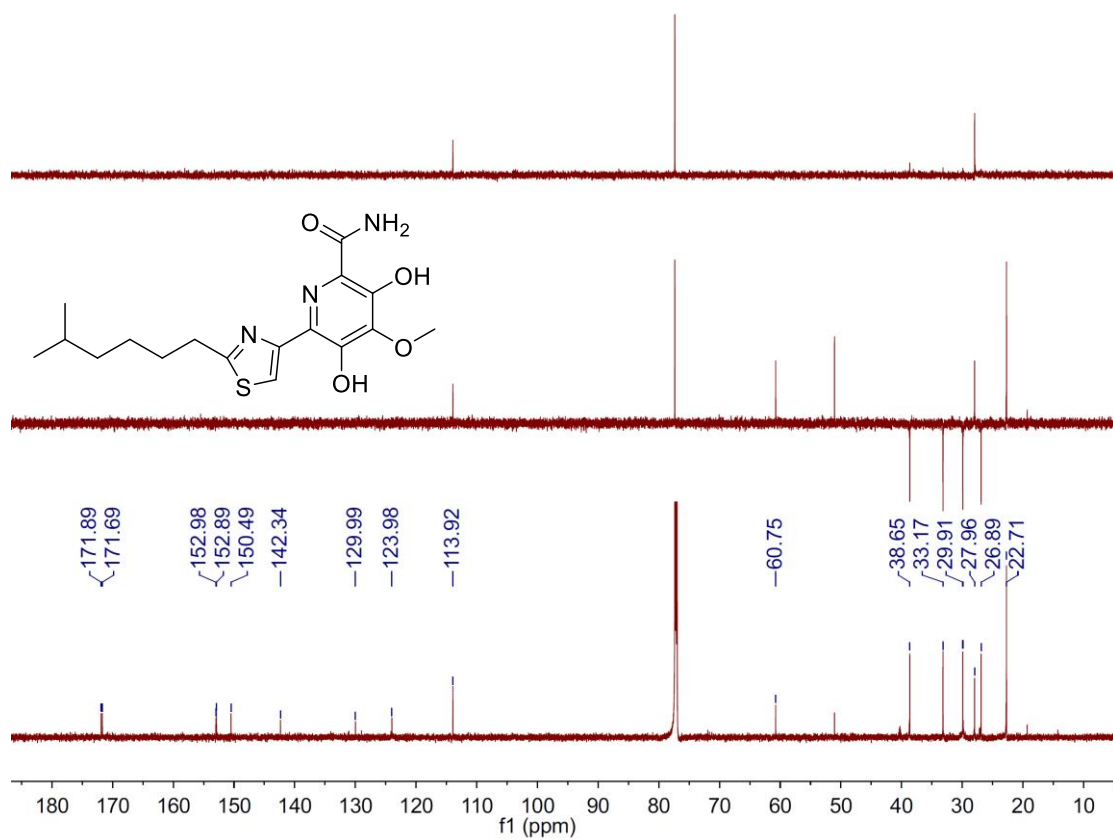

Supplementary Figure 120. <sup>13</sup>C-NMR (200 MHz) spectrum of compound 30 in CDCl<sub>3</sub>.

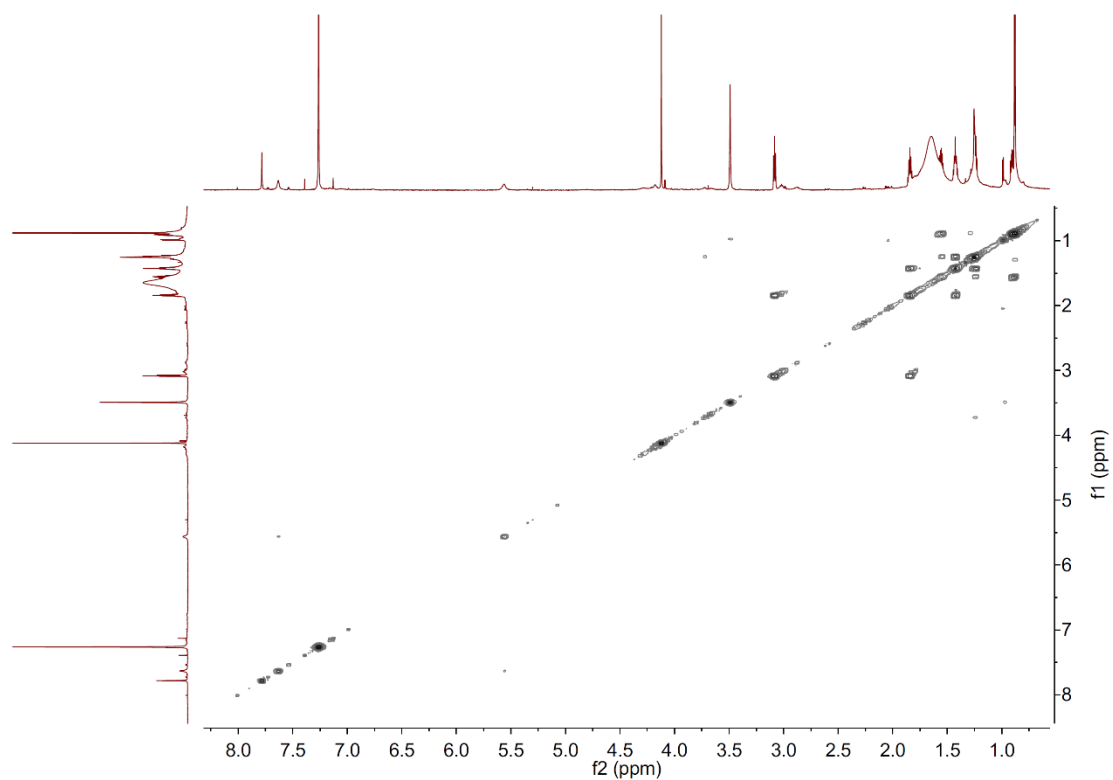

**Supplementary Figure 121.**  $^1\text{H}$ - $^1\text{H}$  COSY (800 MHz) spectrum of compound **30** in  $\text{CDCl}_3$ .

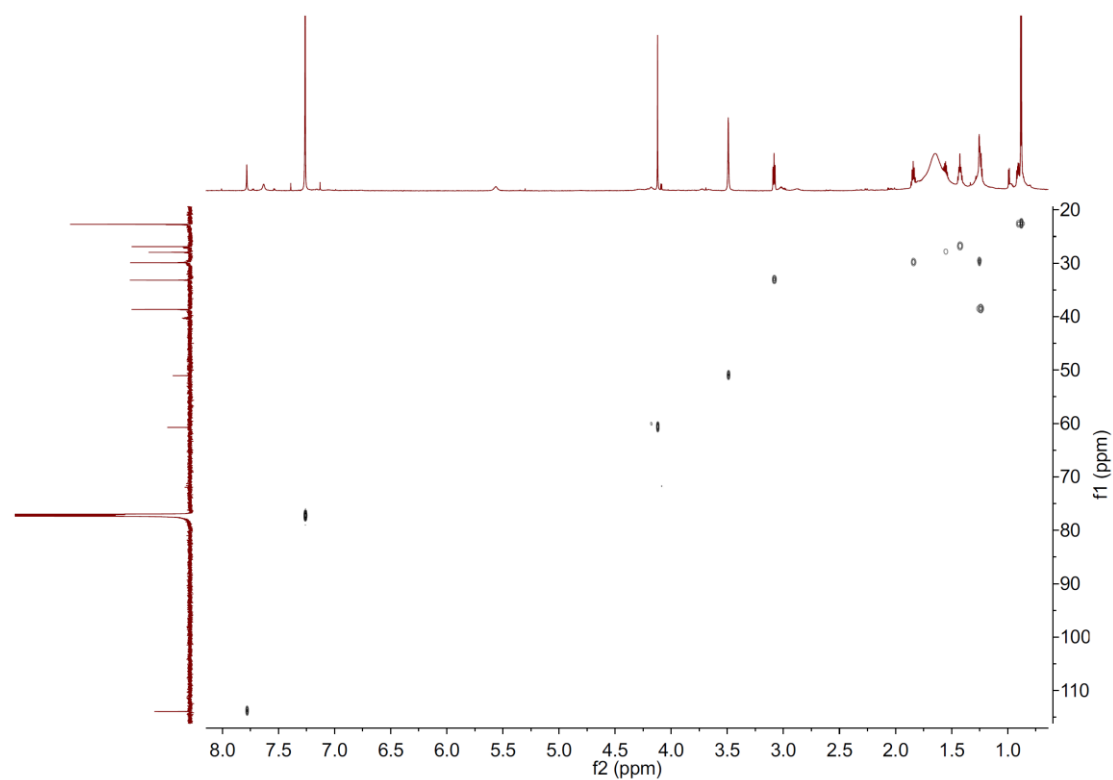

**Supplementary Figure 122.** HSQC (800 MHz) spectrum of compound **30** in  $\text{CDCl}_3$ .



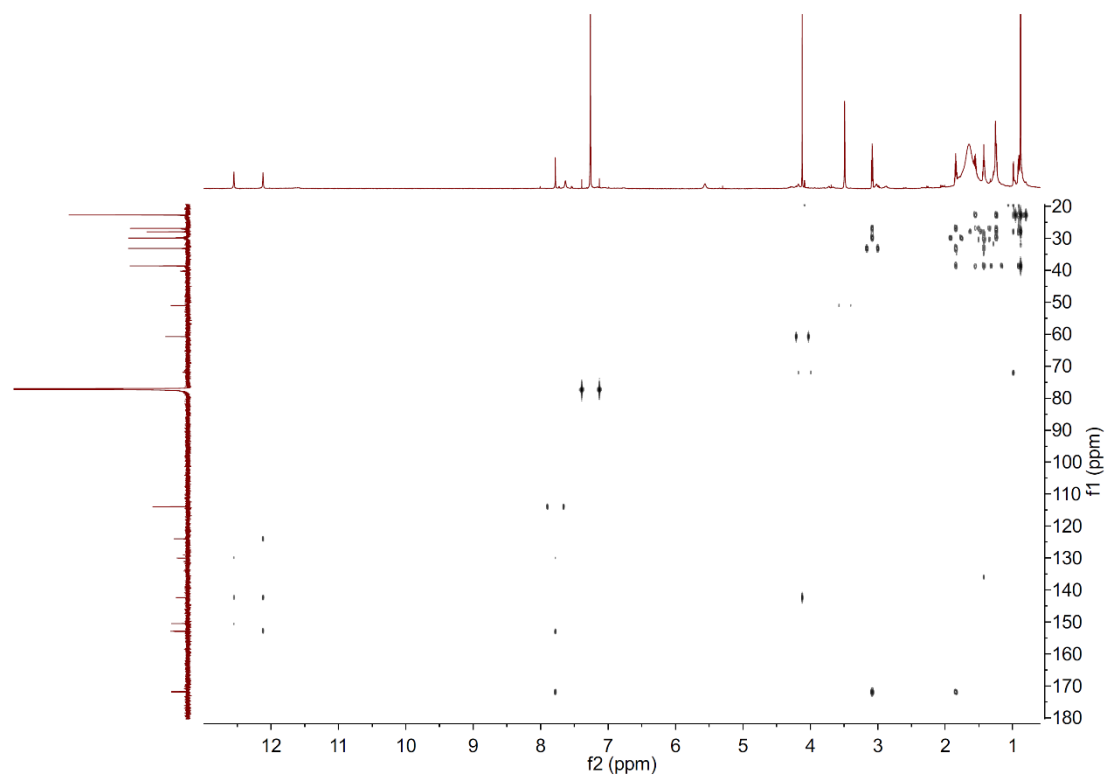

**Supplementary Figure 123.** HMBC (800 MHz) spectrum of compound **30** in  $\text{CDCl}_3$ .

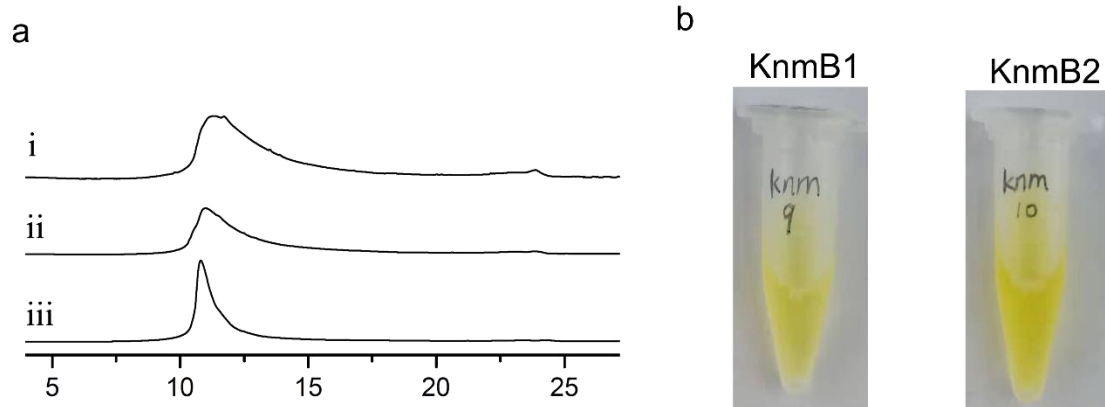

**Supplementary Figure 124.** Examination of the protein nature of KnmB1 and KnmB2. **(a)** HPLC analysis of (i) standard FAD; (ii) the supernatant of KnmB2; (iii) the supernatant of KnmB1. The UV absorbance was monitored at 450 nm. Source data are provided as a Source Data file. **(b)** Purified proteins KnmB1 and KnmB2. A representative result of  $n = 3$  independent experiments is shown.

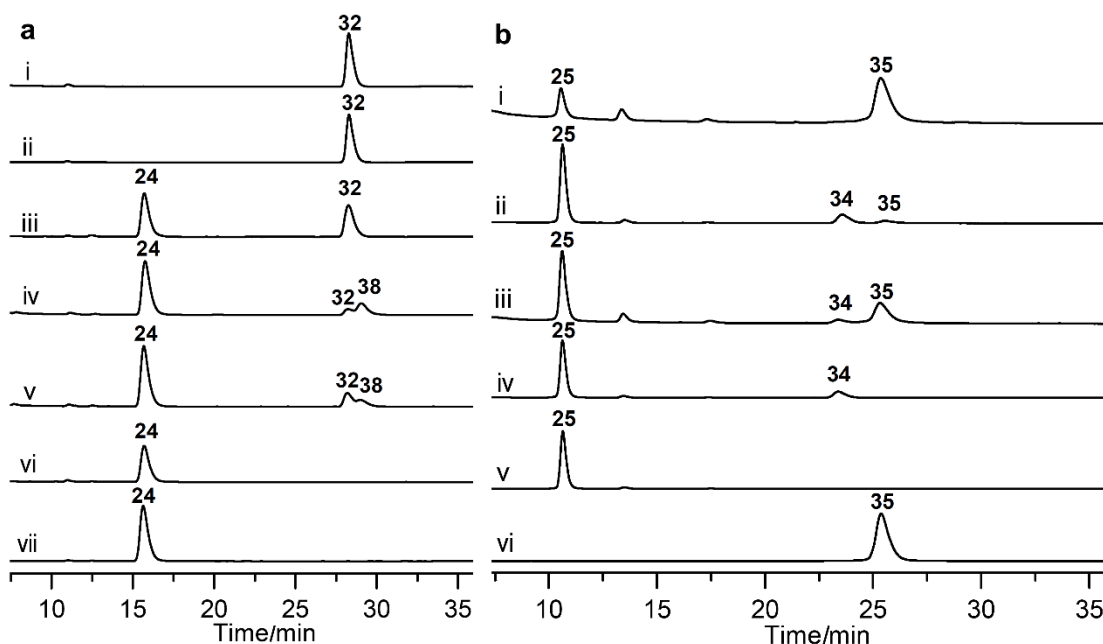

**Supplementary Figure 125.** In vitro characterization of KnmB2-catalyzed reactions. (a) (i) the control reaction in the presence of **32** and NADPH; (ii) the reaction in the presence of **32**, NADPH and KnmB2; (iii) the reaction in the presence of **24**, SAM and KnmF; (iv) the reaction in the presence of **24**, SAM, NADPH, KnmB2 and KnmF; (v) the reaction in the presence of **24**, SAM, NADH, KnmB2 and KnmF; (vi) the reaction in the presence of **24**, NADPH and KnmB2; (vii) the control reaction in the presence of **24**, SAM and NADPH (NADH). HPLC analysis was performed with analytical method C. (b) (i) the reaction was conducted in the presence of **25**, SAM, NADPH and KnmB2, and KnmF was added after 30 min; (ii) the reaction in the presence of **25**, NADH, KnmB2 and KnmF; (iii) the reaction in the presence of **25**, SAM, NADPH, KnmB2 and KnmF; (iv) the reaction in the presence of **25**, SAM and KnmF; (v) the control reaction in the presence of **25**, SAM and NADPH; (vi) standard **35**. HPLC analysis was performed with a 45 min elution system as follows: T = 0 min, 50% B; T = 34 min, 50% B; T = 34.1min, 100% B; T = 39 min, 100% B; T = 39.1.1 min, 50% B; T = 45 min, 50% B (A, H<sub>2</sub>O + 0.1% CH<sub>3</sub>COOH; B, MeCN). The UV absorbance was monitored at 260 nm. A representative result of *n* = 3 independent experiments is shown. Source data are provided as a Source Data file.

## User Spectra

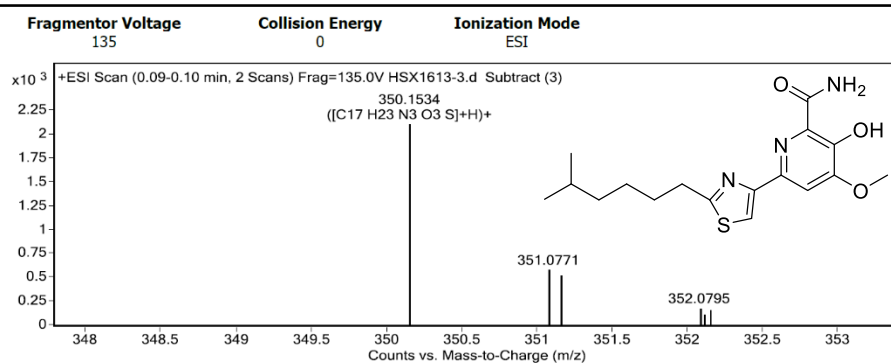

**Supplementary Figure 126.** HRESIMS spectrum of compound **38**.

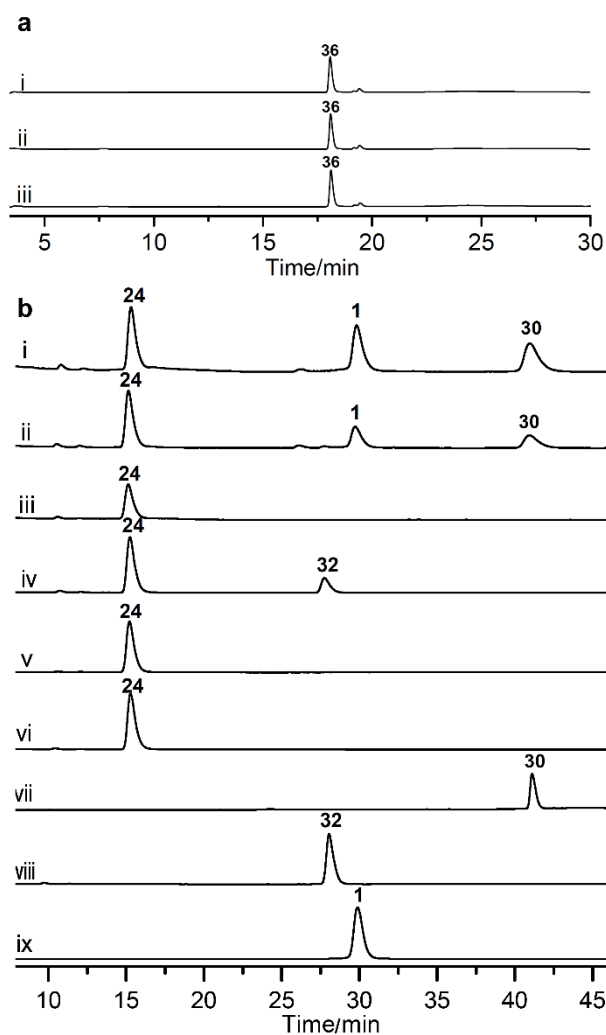

**Supplementary Figure 127.** In vitro characterization of KnmB1-catalyzed reactions. **(a)** (i) the reaction in the presence of **36**, NADPH and KnmB1; (ii) the reaction in the presence of **36**, NADPH, SAM, KnmB1 and KnmF; (iii) the control reaction in the presence of **36**, SAM and NADPH. HPLC analytical method: T = 0 min, 10% B; T = 20 min, 100% B; T = 25 min, 100% B; T = 25.1 min, 10% B; T = 30 min, 10% B (A, H<sub>2</sub>O; B, CH<sub>3</sub>OH). **(b)** (i) the reaction in the presence of **24**, SAM, NADPH, KnmB1, KnmB2 and KnmF; (ii) the reaction in the presence of **24**, SAM, NADH, KnmB1, KnmB2 and

KnmF; (iii) the reaction in the presence of **24**, NADPH, KnmB1 and KnmB2; (iv) the reaction in the presence of **24**, SAM, NADPH, KnmB1 and KnmF; (v) the reaction in the presence of **24**, NADPH and KnmB1; (vi) the control reaction in the presence of **24**, SAM and NADPH; (vii) standard **30**; (viii) standard **32**; (ix) standard **1**. HPLC analysis was performed with analytical method C. The UV absorbance was monitored at 260 nm. A representative result of  $n = 3$  independent experiments is shown. Source data are provided as a Source Data file.

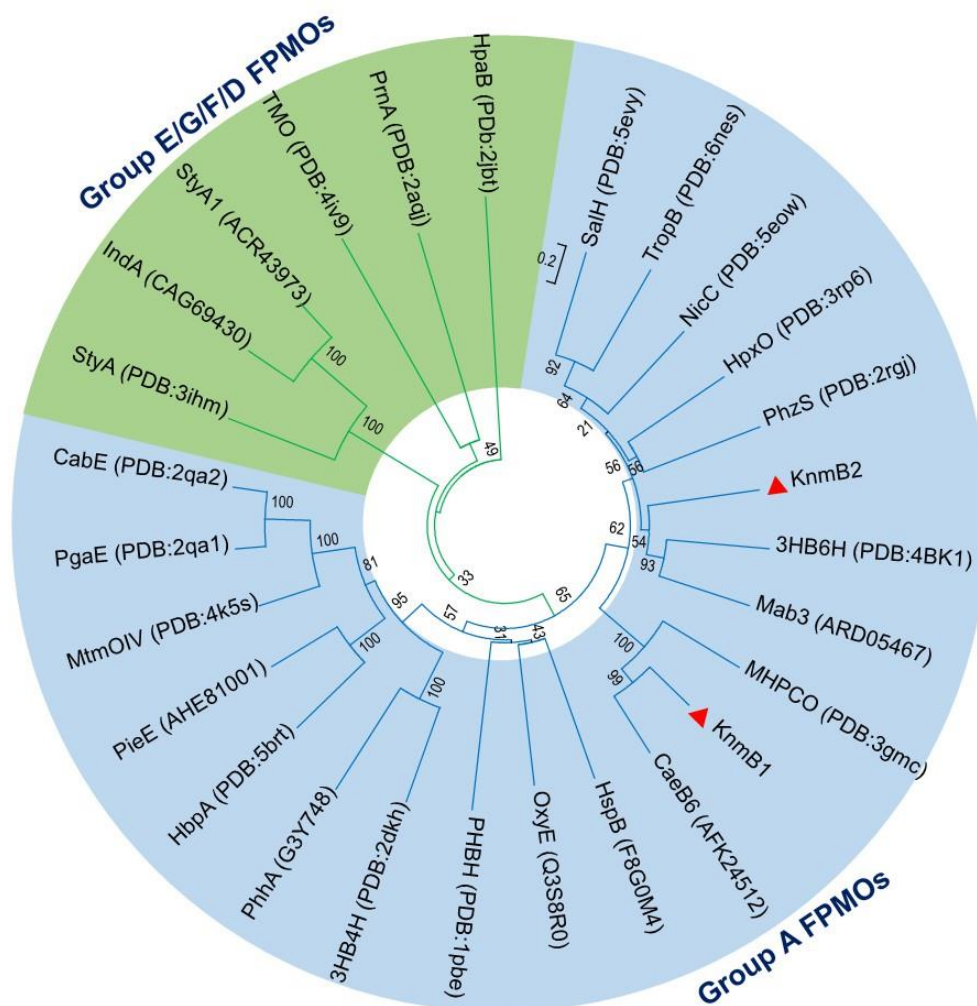

**Supplementary Figure 128.** Phylogenetic analysis of KnmB1, KnmB2 and the other group A FPMOs. KnmB1 and KnmB2 belong to group A FPMOs. The tree was calculated on the basis of an amino acid sequence alignment of 27 protein sequences of biochemically characterized enzymes by employing the ClustalW method in MEGA7<sup>13</sup>. Subsequently, the Neighbor-Joining method was used to generate the tree while the evolutionary distances were computed using the JTT matrix-based method<sup>14</sup>. The percentage of replicate trees in which the associated taxa clustered together in the bootstrap test (1000 replicates) are shown next to the branches<sup>15</sup>. To provide a comprehensive view, we used group D, E, F and G FPMOs representatives.

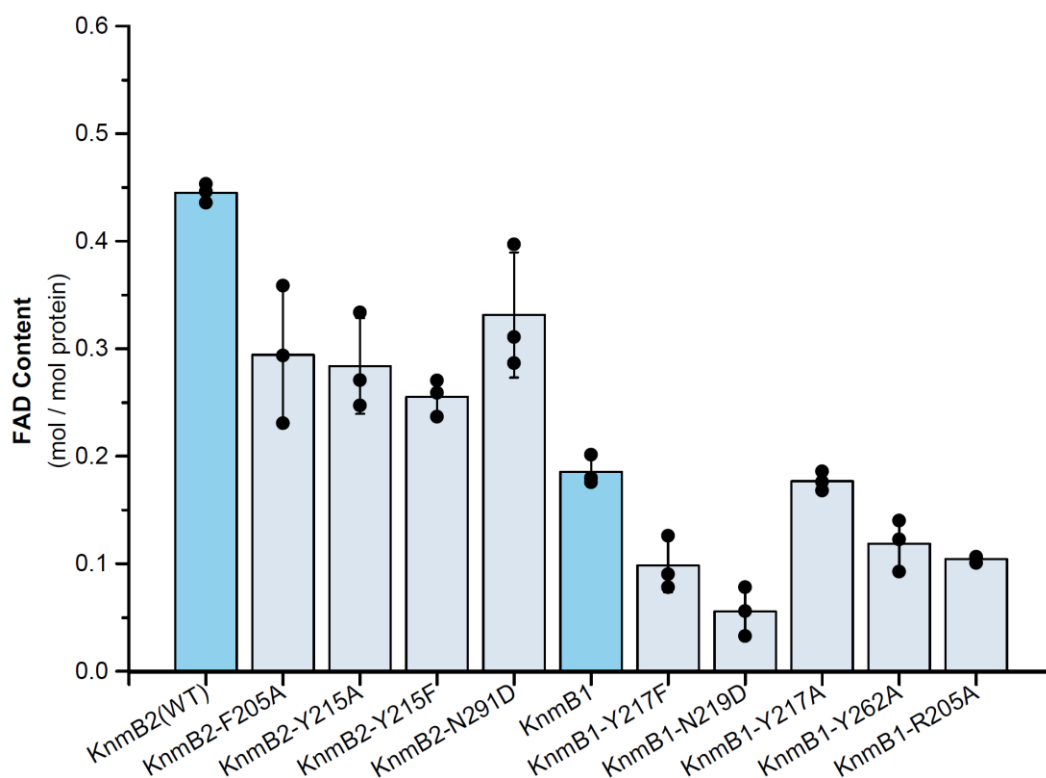

**Supplementary Figure 129.** FAD content of KnmB1, KnmB2 and variants. Data represent the mean of  $n = 3$  independent replicates, and error bars denote S.D. Source data are provided as a Source Data file.

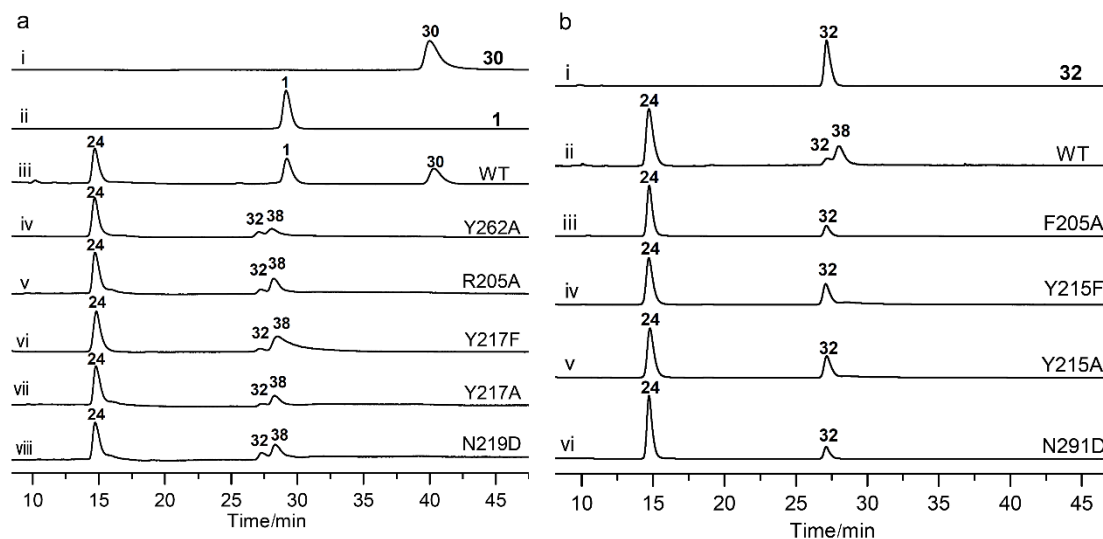

**Supplementary Figure 130.** In vitro characterization of the monooxygenase activity of active site variants of KnmB1 and KnmB2. (a) The reaction was conducted in the presence of **24**, SAM, NADPH, KnmB2 and KnmB1 variants, and KnmF was added after 30 min. (b) The reaction was conducted in the presence of **24**, SAM, NADPH, KnmB2 variants, and KnmF was added after 30 min. HPLC analysis was performed with analytical method C. The UV absorbance was monitored at 260 nm. A representative result of  $n = 3$  independent experiments is shown. Source data are provided as a Source Data file.

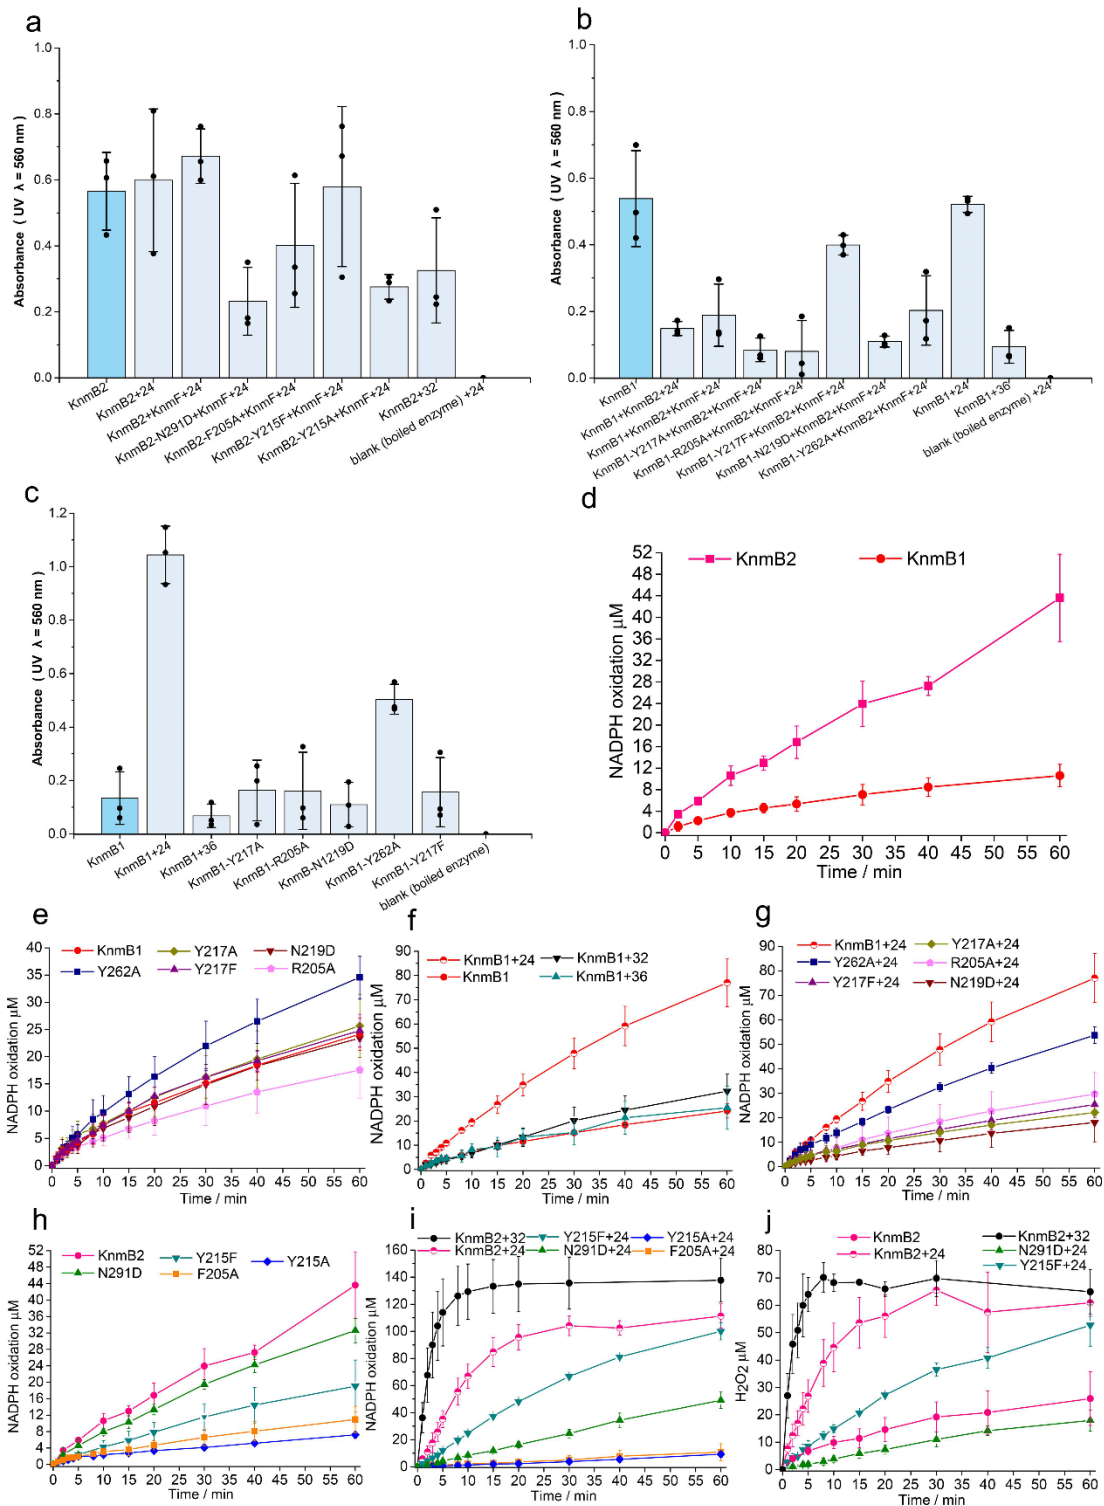

**Supplementary Figure 131.**  $\text{H}_2\text{O}_2$  generation and NADPH oxidation for KnmB2, KnmB1 and their variants. **(a)** Hydrogen peroxide formation of KnmB2 and variants. Reaction conditions: 100  $\mu\text{L}$  system containing 50 mM Tris-HCl buffer (pH 7.5), 1 mM NADPH, 16  $\mu\text{M}$  KnmB2 or variants, 0.1 mM compound **24**, 1 mM SAM, and 2  $\mu\text{M}$  KnmF at 30  $^\circ\text{C}$  for 3h. **(b)** Hydrogen peroxide formation of KnmB1 and variants. Reaction conditions: 100  $\mu\text{L}$  system containing 50 mM Tris-HCl buffer (pH 7.5), 1 mM NADPH, 16  $\mu\text{M}$  KnmB2, 17  $\mu\text{M}$  KnmB1 or variants, 0.1 mM compound **24**, 1 mM SAM, and 2

$\mu\text{M}$  KnmF at 30 °C for 3h. (c) Hydrogen peroxide formation of KnmB1 and variants. Reaction conditions: 100 $\mu\text{L}$  system containing 50 mM Tris-HCl buffer (pH 7.5), 0.3 mM NADPH, and 6  $\mu\text{M}$  KnmB1 or variants, or 0.1 mM **24** at 30 °C for 30 min. (d) NADPH oxidation of KnmB2 and KnmB1. Reaction conditions: 50 mM Tris-HCl buffer (pH 7.5), 0.15 mM NADPH, and 2  $\mu\text{M}$  KnmB1 or KnmB2. (e) NADPH oxidation of KnmB1 and variants. (f) NADPH oxidation of KnmB1 in the presence **24/32/36**. (g) NADPH oxidation of KnmB1 and variants in the presence **24**. Reaction conditions (e-g) for KnmB1 and their variants: 50 mM Tris-HCl buffer (pH 7.5), 0.15 mM NADPH, and 6  $\mu\text{M}$  KnmB1 or variants, or 0.1 mM substrate **24/32/36**. (h) NADPH oxidation of KnmB2 and variants. (i) NADPH oxidation of KnmB2 and variants in the presence **24** or **32**. (j)  $\text{H}_2\text{O}_2$  generation for KnmB2 and variants in the presence **24** or **32**. Reaction conditions (h-j) for KnmB2 and their variants: 50 mM Tris-HCl buffer (pH 7.5), 0.15 mM NADPH, 2  $\mu\text{M}$  KnmB2 or variants, or 0.1 mM substrate **24/32**. Values are the means  $\pm$  SD of  $n = 3$  independent experiments, except for KnmB2+**24** (T = 40 min), KnmB2-N219D+**24** (T = 4 min), KnmB2-Y215F+**24** (T= 1 min and 3 min) in i and j, and KnmB2+**32** (T= 8 min) in j ( $n = 2$ ). Source data are provided as a Source Data file.

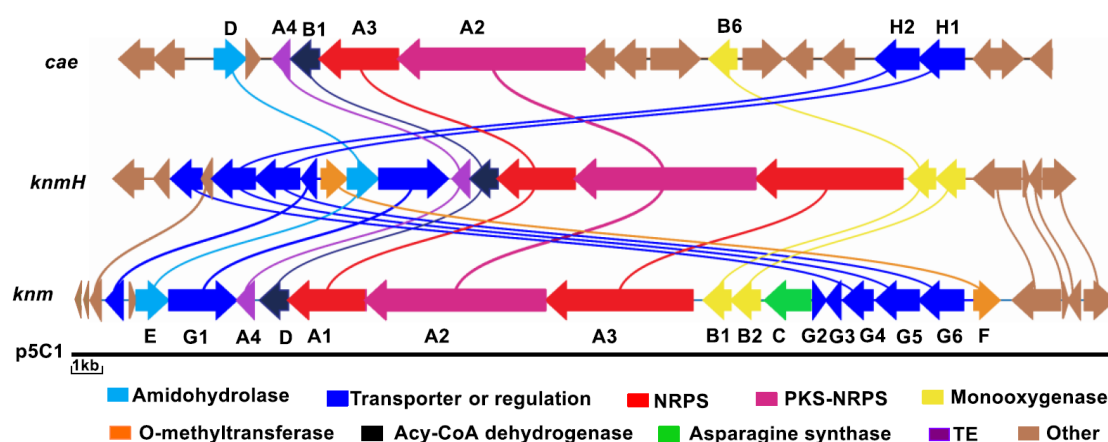

**Supplementary Figure 132.** Comparison of the organization of the *cae* BGC from *A. cyanogriseus* NRRL B-2194 (GenBank: JQ687072), *knmH* BGC from *L. aerocolonigenes* NBRC 13195 (GenBank: GCA\_000974445.1) and *knm* BGC from *L. rhizosphaerae* NEAU-A2 (GenBank: OM436385-OM436408). The sequence alignment of gene clusters was created using Clustal Omega<sup>16</sup> and the figure was produced using EsPript 3.0<sup>17</sup>.

## User Spectra

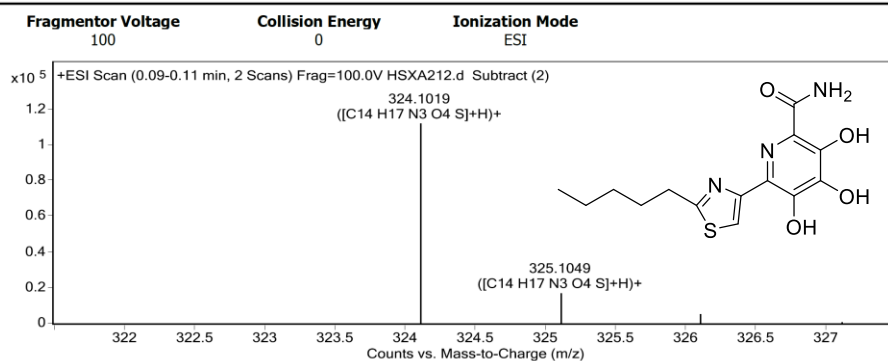

Supplementary Figure 133. HRESIMS spectrum of compound **29**.

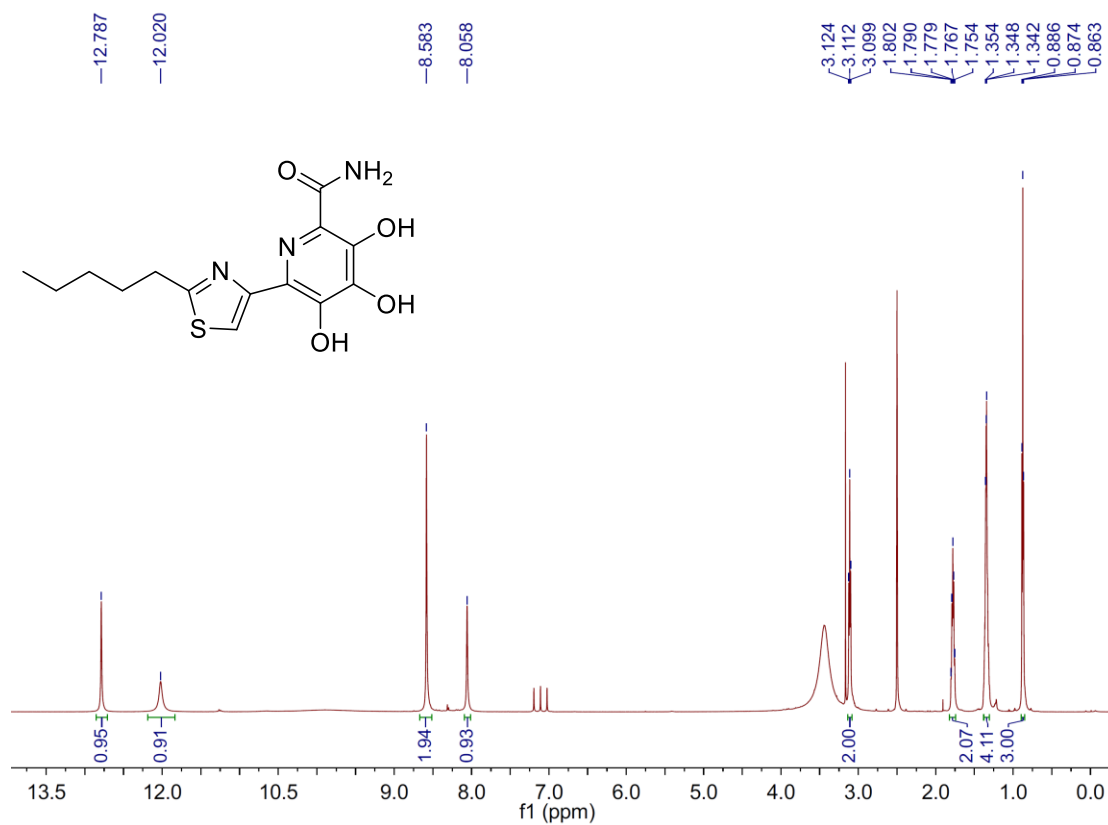

Supplementary Figure 134. <sup>1</sup>H-NMR (600 MHz) spectrum of compound **29** in DMSO-*d*<sub>6</sub>.



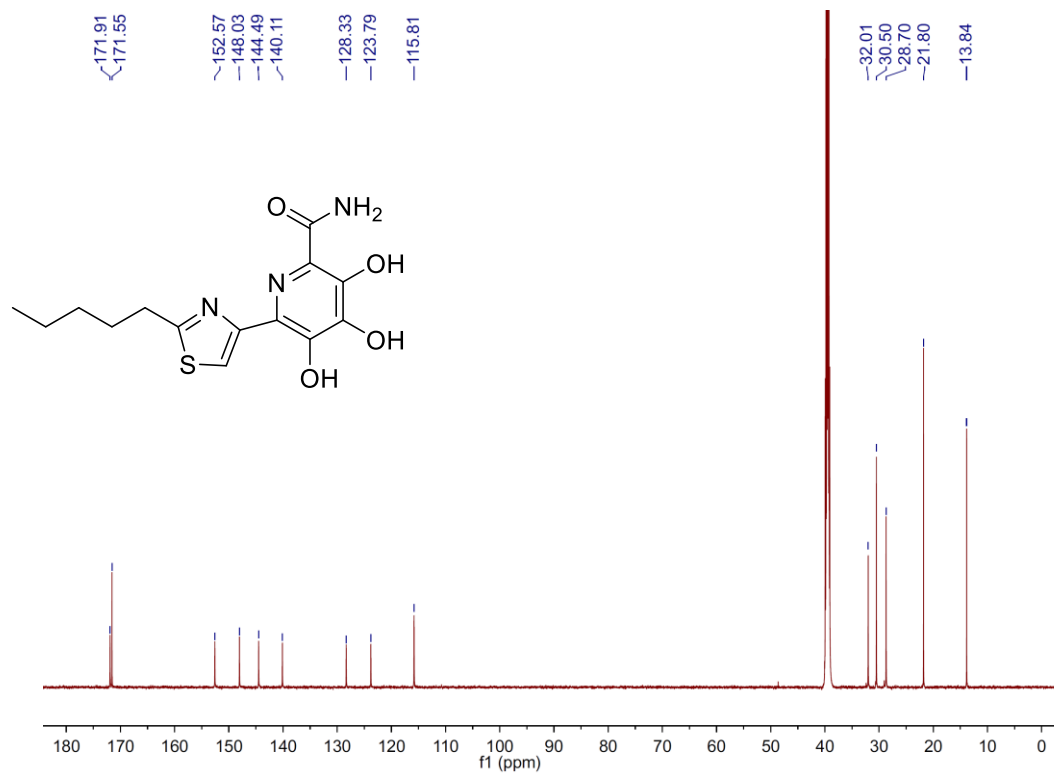

**Supplementary Figure 135.**  $^{13}\text{C-NMR}$  (150 MHz) spectrum of compound **29** in  $\text{DMSO-}d_6$ .

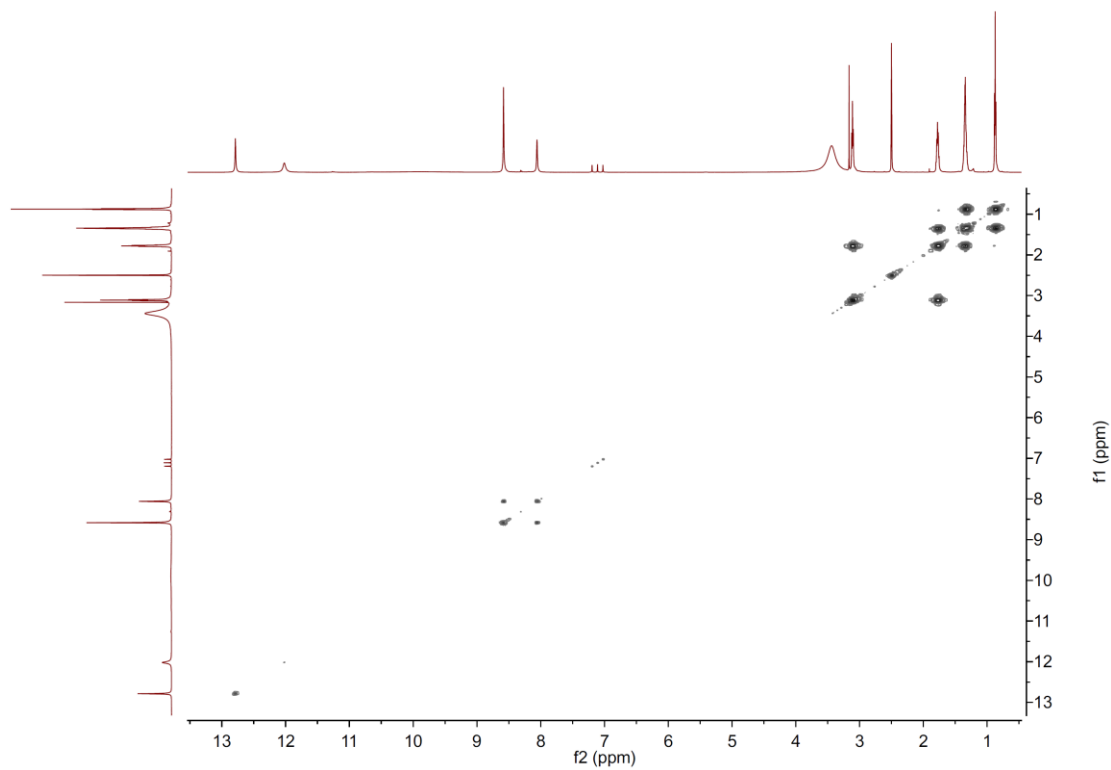

**Supplementary Figure 136.**  $^1\text{H-}^1\text{H}$  COSY (600 MHz) spectrum of compound **29** in  $\text{DMSO-}d_6$ .

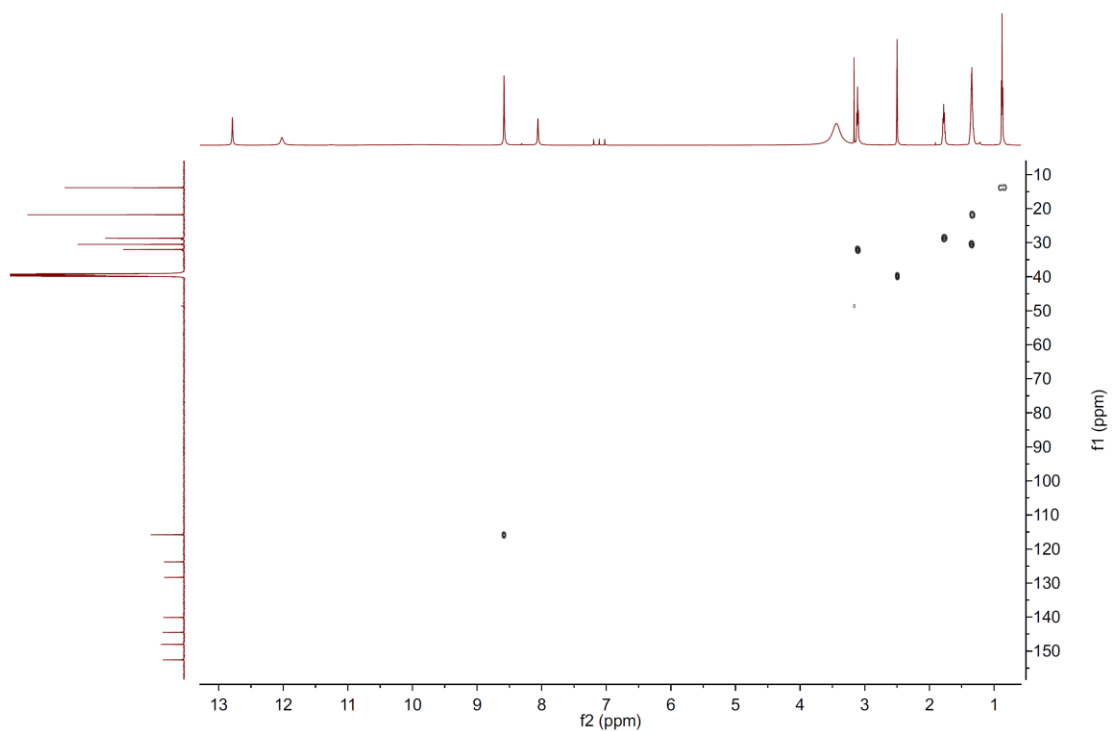

**Supplementary Figure 137.** HSQC (600 MHz) spectrum of compound **29** in DMSO- $d_6$ .

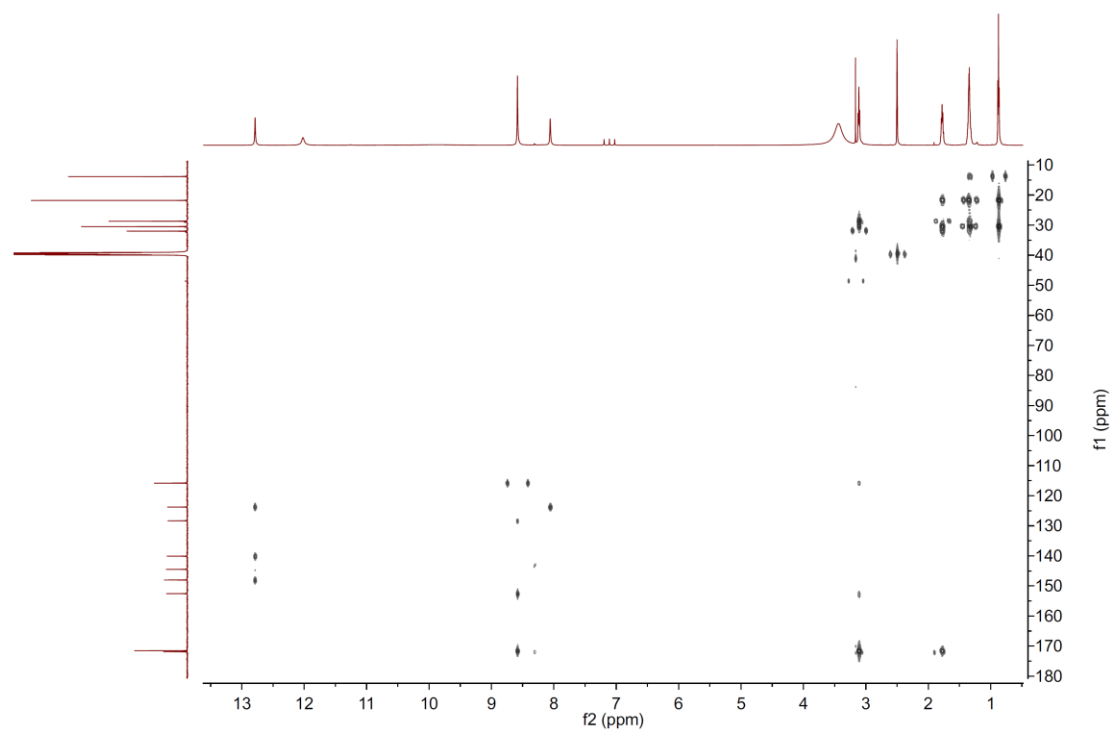

**Supplementary Figure 138.** HMBC (600 MHz) spectrum of compound **29** in DMSO- $d_6$ .

## User Spectra

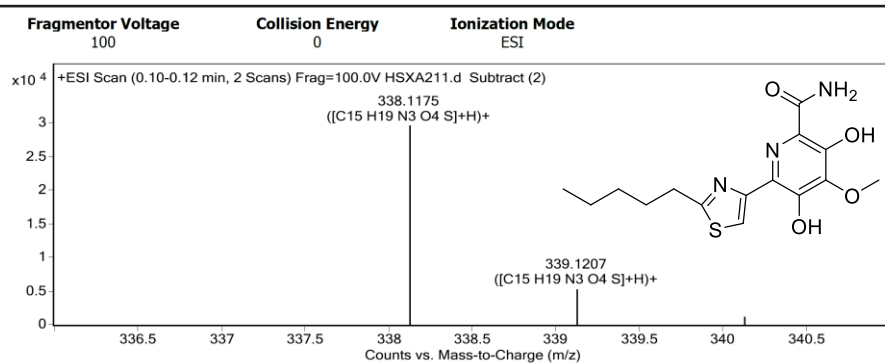

Supplementary Figure 139. HRESIMS spectrum of compound **31**.

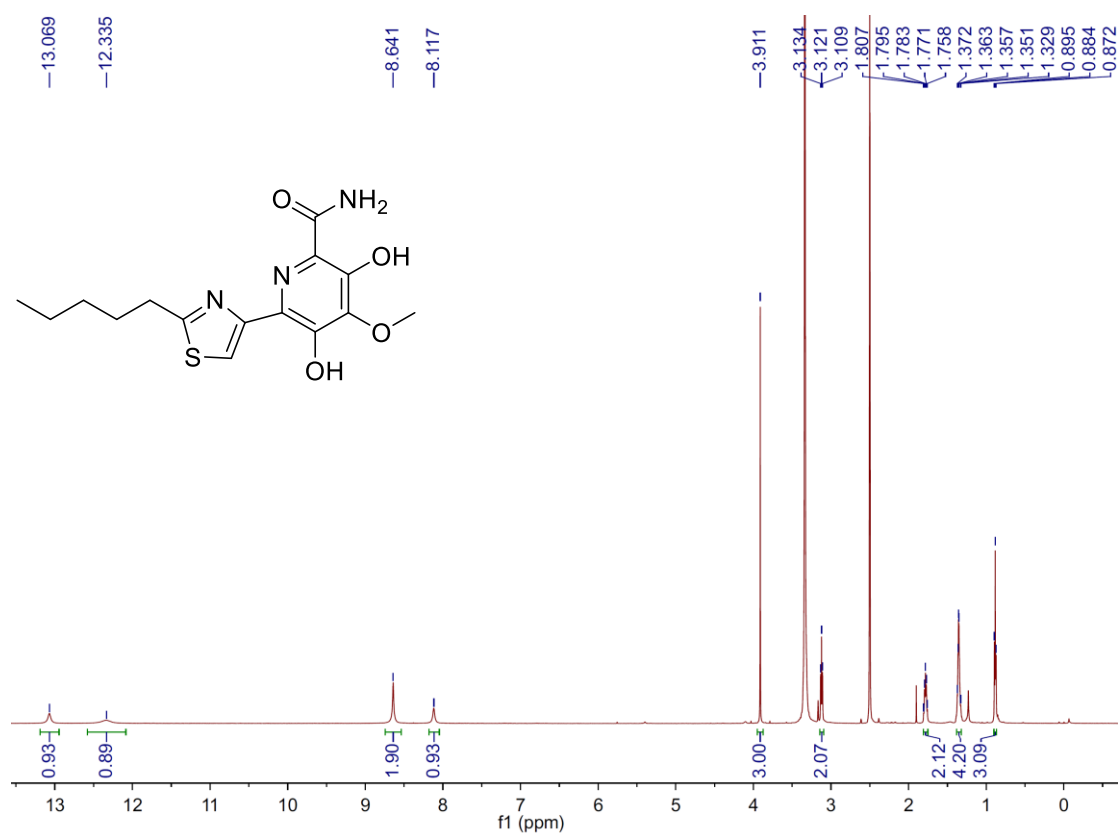

Supplementary Figure 140.  $^1\text{H-NMR}$  (600 MHz) spectrum of compound **31** in  $\text{DMSO-}d_6$ .

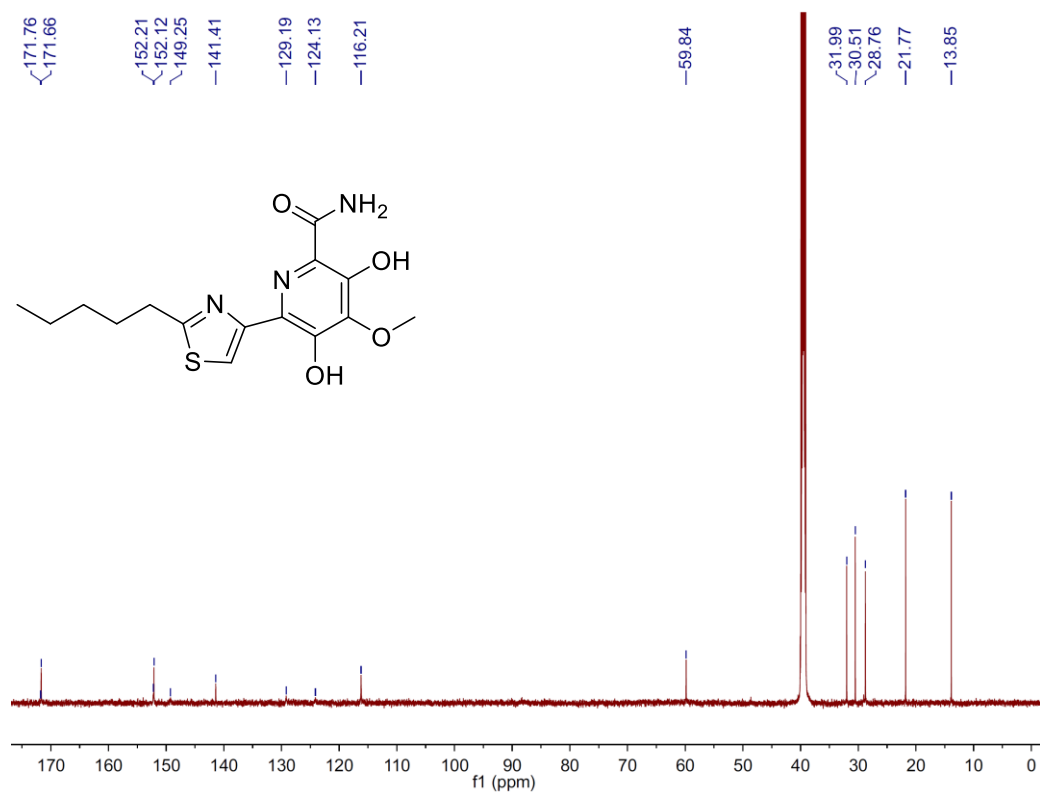

**Supplementary Figure 141.**  $^{13}\text{C-NMR}$  (150 MHz) spectrum of compound **31** in  $\text{DMSO-}d_6$ .

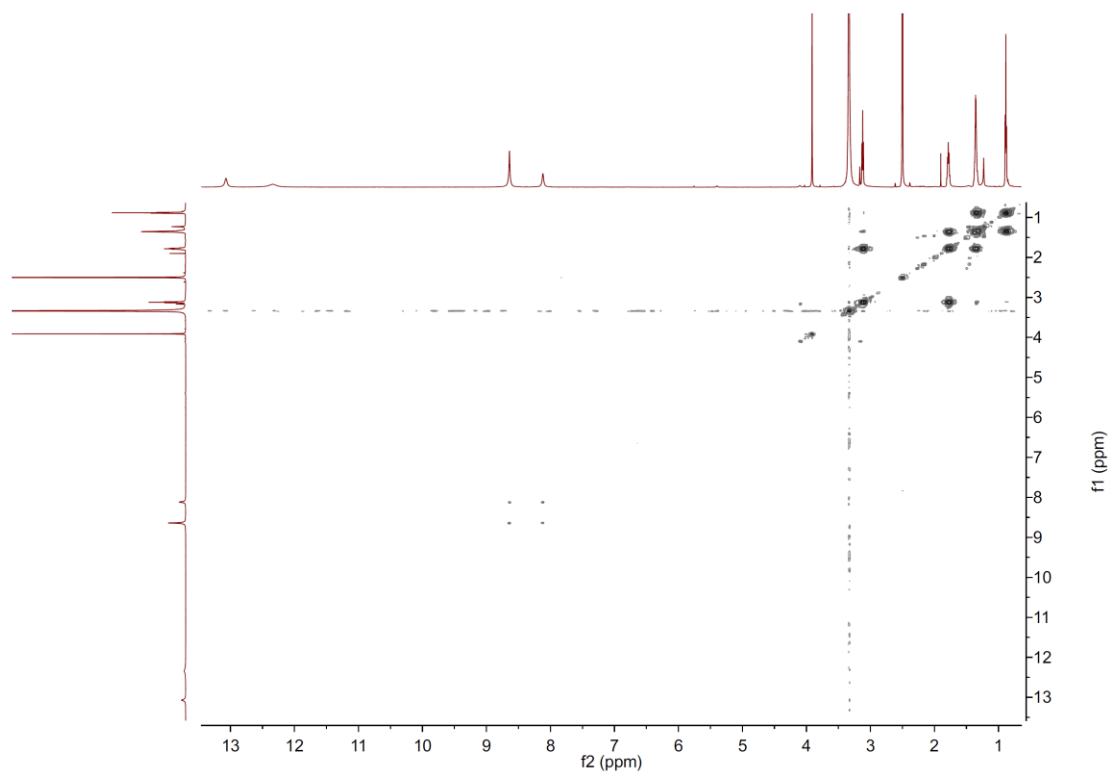

**Supplementary Figure 142.**  $^1\text{H-}^1\text{H}$  COSY (600 MHz) spectrum of compound **31** in  $\text{DMSO-}d_6$ .

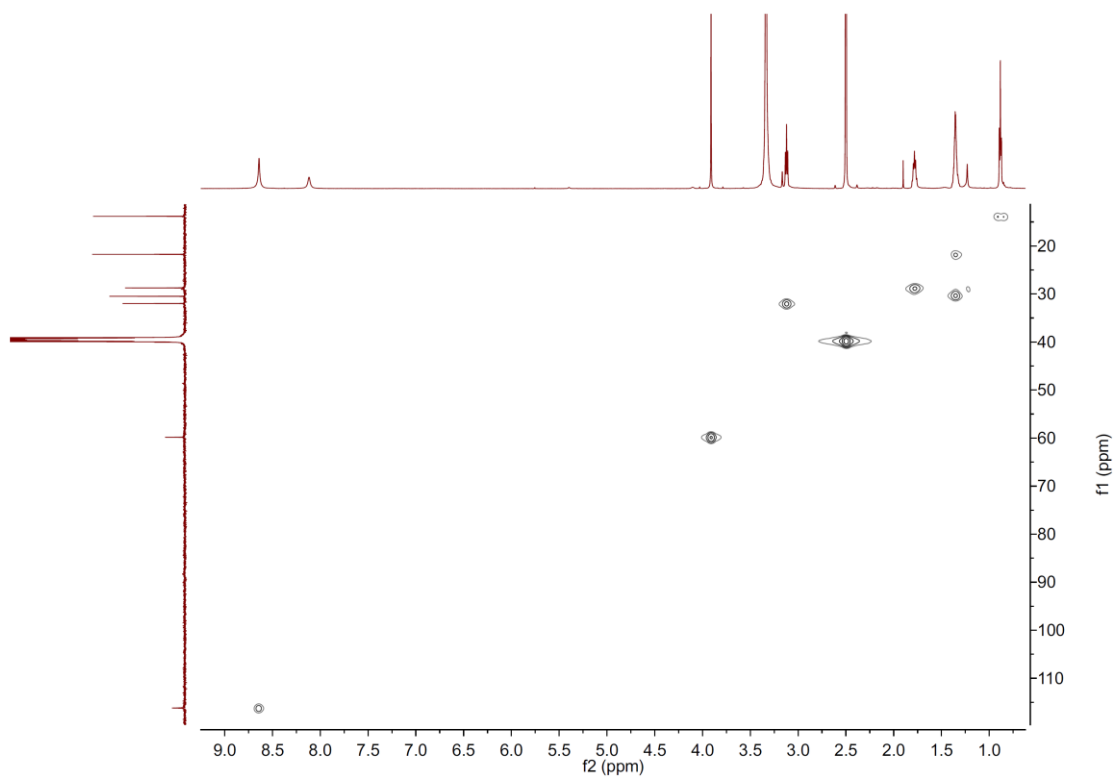

**Supplementary Figure 143.** HSQC (600 MHz) spectrum of compound **31** in DMSO- $d_6$ .

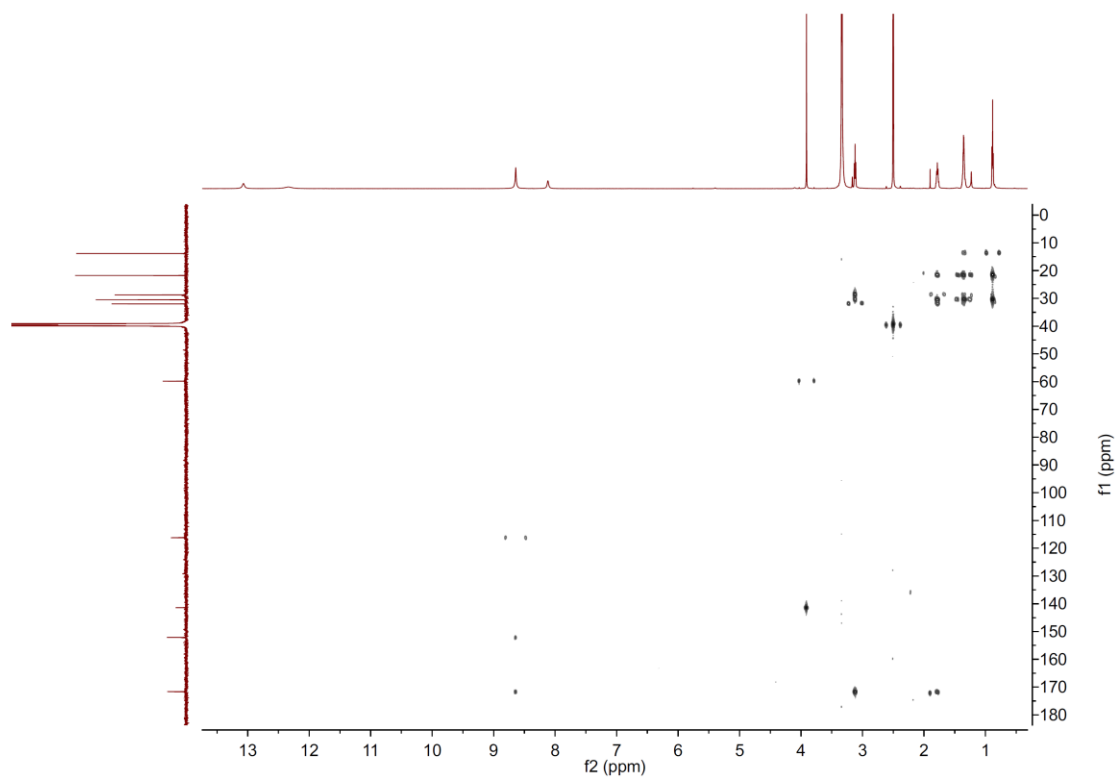

**Supplementary Figure 144.** HMBC (600 MHz) spectrum of compound **31** in DMSO- $d_6$ .

## User Spectra

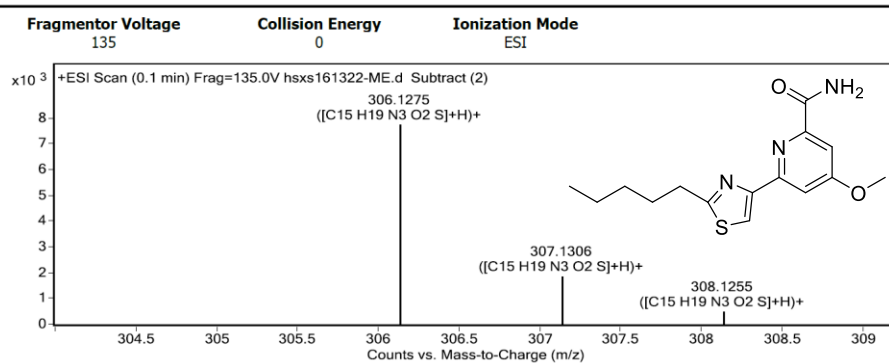

Supplementary Figure 145. HRESIMS spectrum of compound **34**.

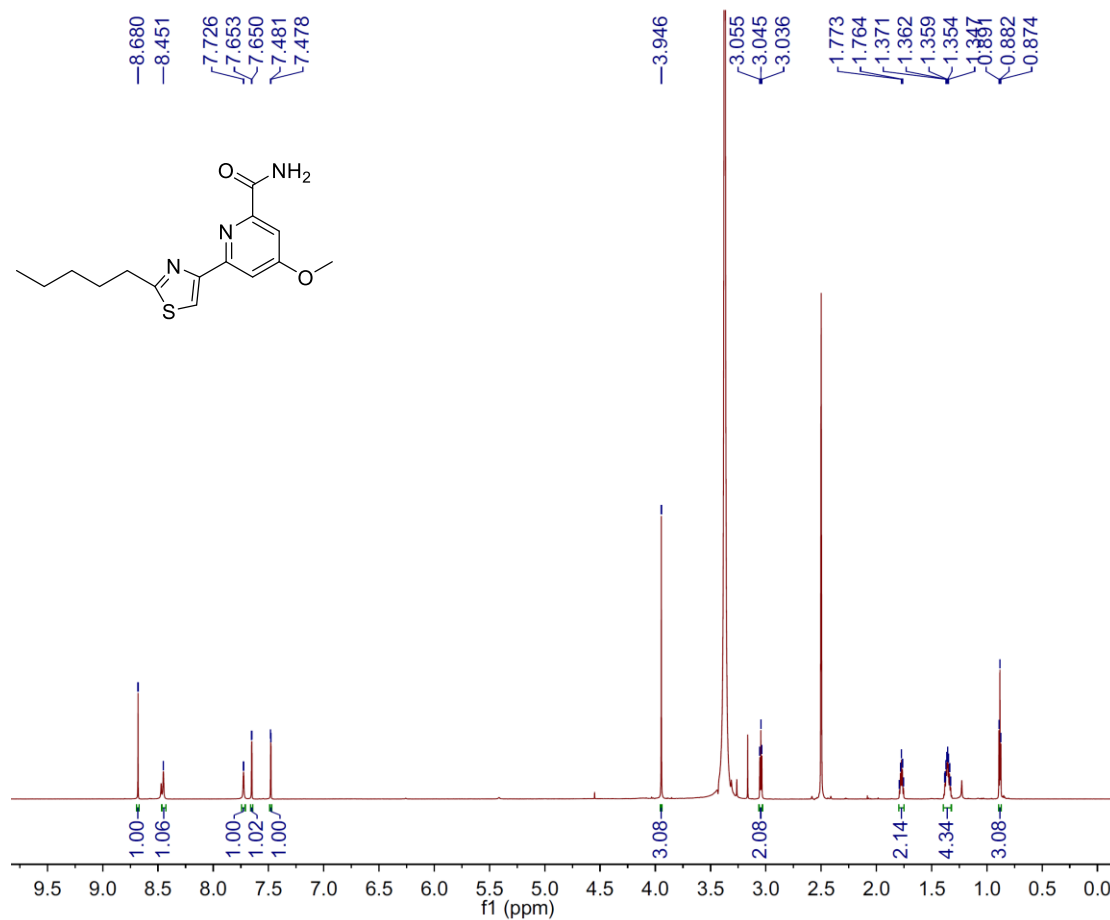

Supplementary Figure 146. <sup>1</sup>H-NMR (800 MHz) spectrum of compound **34** in DMSO-*d*<sub>6</sub>.

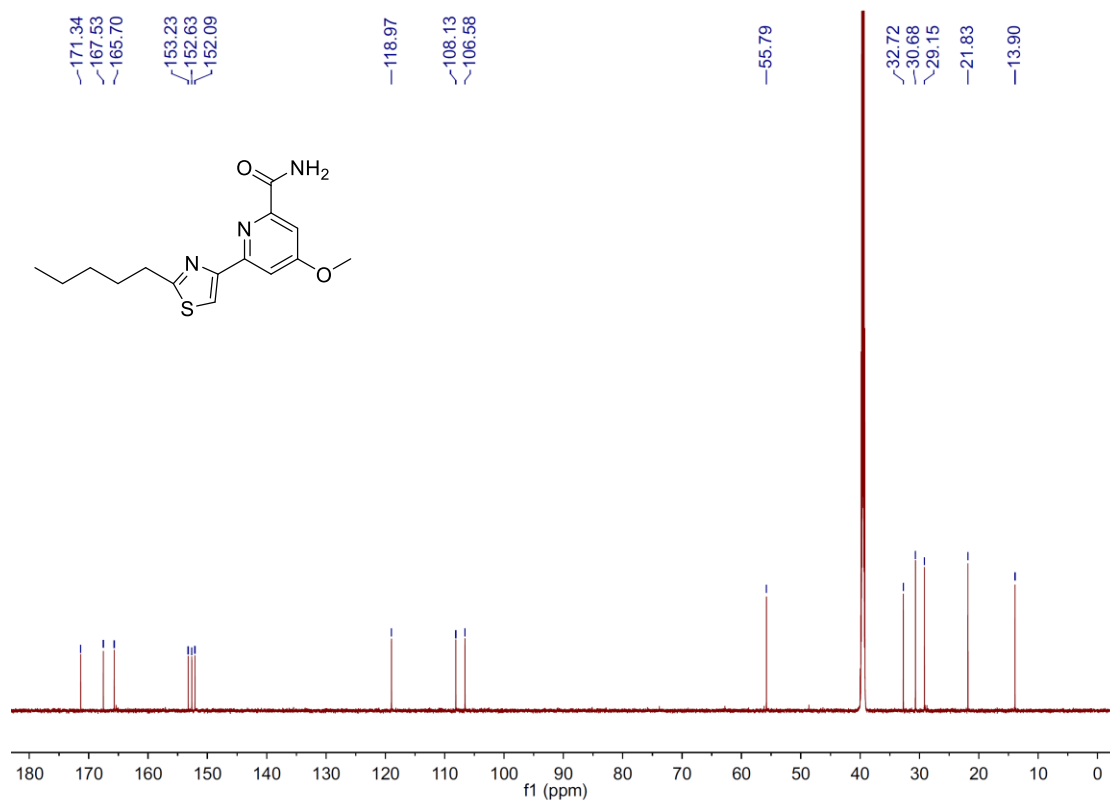

**Supplementary Figure 147.**  $^{13}\text{C-NMR}$  (200 MHz) spectrum of compound **34** in  $\text{DMSO-}d_6$ .

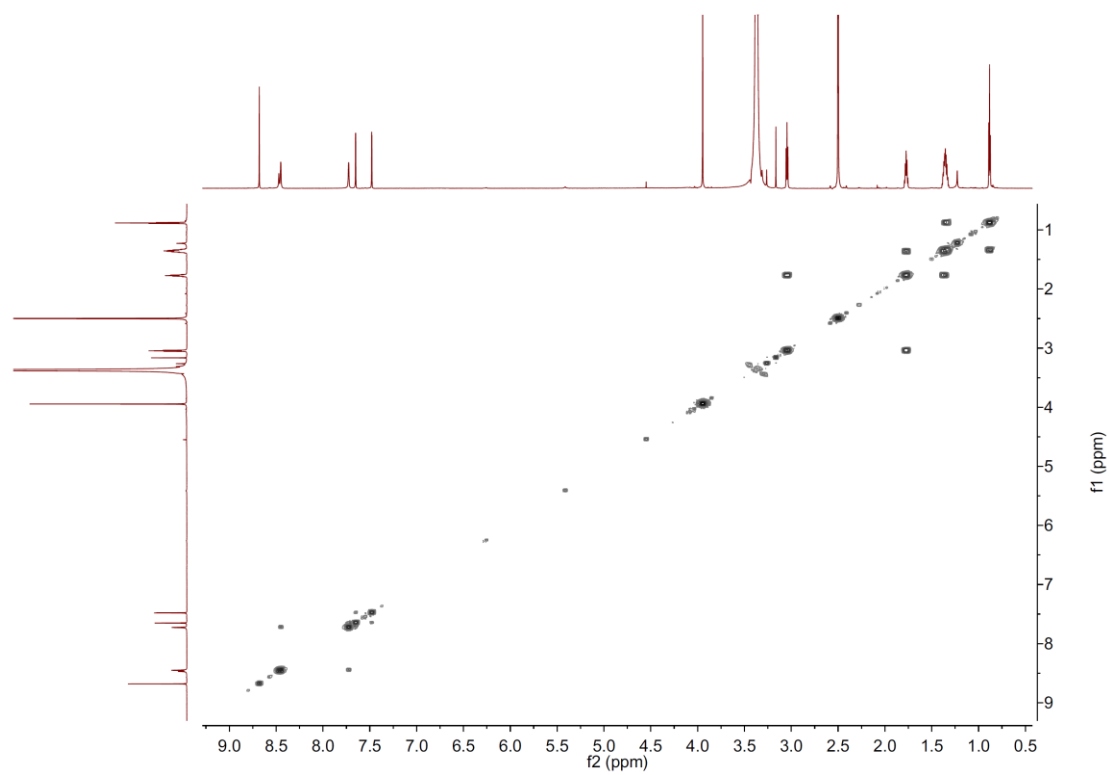

**Supplementary Figure 148.**  $^1\text{H-}^1\text{H}$  COSY (800 MHz) spectrum of compound **34** in  $\text{DMSO-}d_6$ .

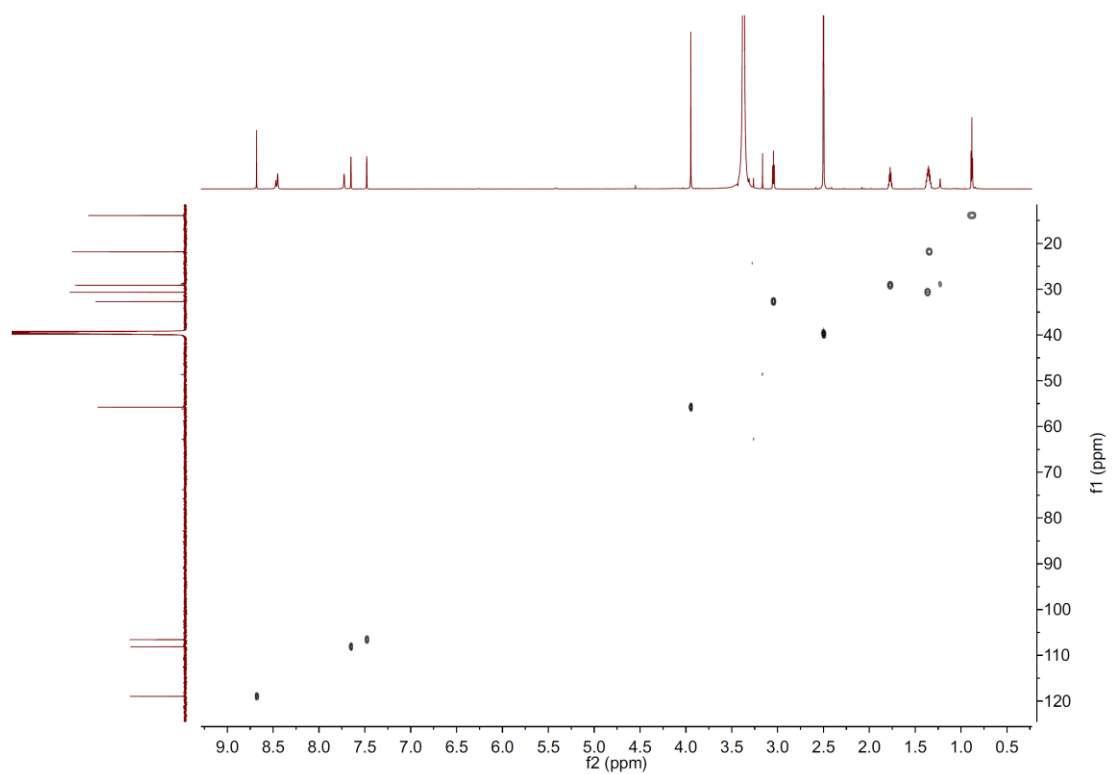

**Supplementary Figure 149.** HSQC (800 MHz) spectrum of compound **34** in DMSO- $d_6$ .

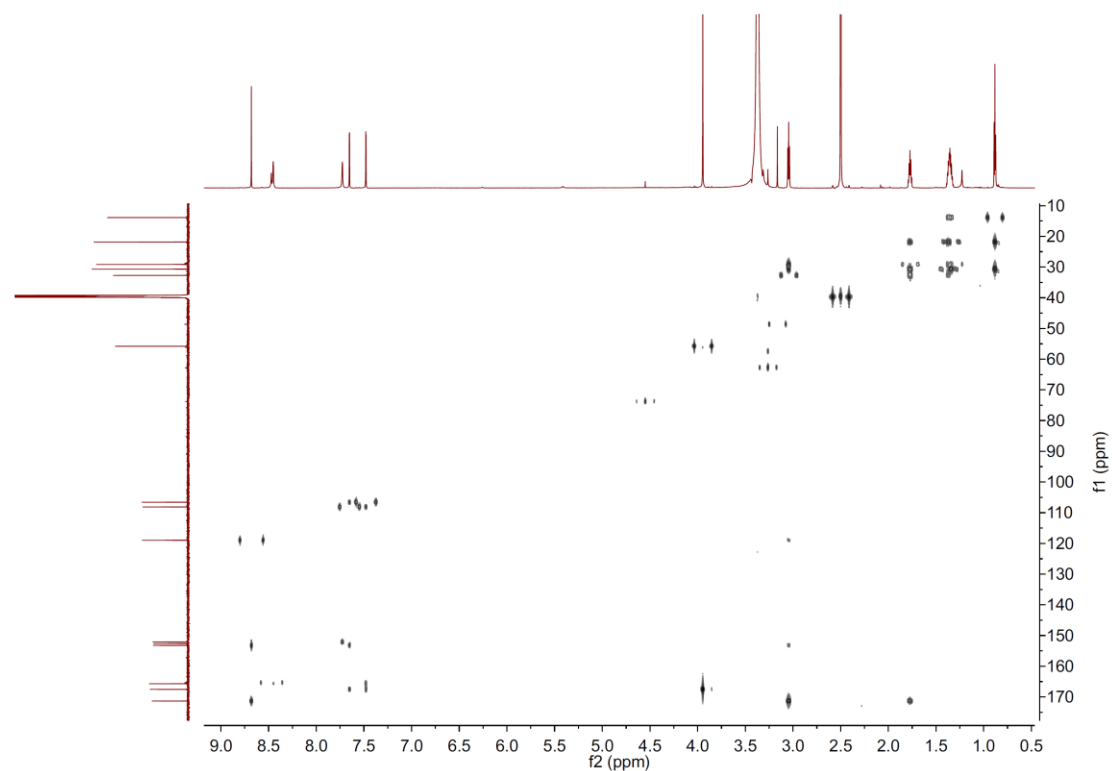

**Supplementary Figure 150.** HMBC (800 MHz) spectrum of compound **34** in DMSO- $d_6$ .



## Supplementary References

1. Deng, Y., Yang, C. H. & Smith Iii, A. B. Enantioselective total synthesis of (+)-peniciketals A and B: two Architecturally complex spiroketals. *J. Am. Chem. Soc.* **143**, 1740-1744 (2021).
2. Shen, A. L. & Kasper, C. B. Differential contributions of NADPH-cytochrome P450 oxidoreductase FAD binding site residues to flavin binding and catalysis. *J. Biol. Chem.* **275**, 41087-41091 (2000).
3. Chapman, S.K. & Reid, G. A. Flavoprotein Protocols. (Humana Press, Totowa, New Jersey, 1999).
4. Zhu, Z., Chen, Y., Shi, G. & Zhang, X. Selenium delays tomato fruit ripening by inhibiting ethylene biosynthesis and enhancing the antioxidant defense system. *Food Chemistry* **219**, 179-184 (2017).
5. Robinson, R. & Sobrado, P. Substrate binding modulates the activity of Mycobacterium smegmatis G, a flavin-dependent monooxygenase involved in the biosynthesis of hydroxamate-containing siderophores. *Biochemistry* **50**, 8489-8496 (2011).
6. Catucci, G., Gao, C., Rampolla, G., Gilardi, G. & Sadeghi, S.J. Uncoupled human flavin-containing monooxygenase 3 releases superoxide radical in addition to hydrogen peroxide. *Free Radic. Biol. Med.* **145**, 250-255 (2019).
7. Paget, M. S., Chamberlin, L., Atrih, A., Foster, S. J. & Buttner, M. J. Evidence that the extracytoplasmic function sigma factor sigmaE is required for normal cell wall structure in *Streptomyces coelicolor* A3(2). *J. Bacteriol.* **181**, 204-211 (1999).
8. Li, L. et al. The mildiomycin biosynthesis: initial steps for sequential generation of 5-hydroxymethylcytidine 5'-monophosphate and 5-hydroxymethylcytosine in *Streptoverticillium rimofaciens* ZJU5119. *Chembiochem* **9**, 1286-1294 (2008).
9. Datsenko, K. A. & Wanner, B. L. One-step inactivation of chromosomal genes in *Escherichia coli* K-12 using PCR products. *Proc. Natl. Acad. Sci. USA* **97**, 6640-6645 (2000).
10. Chater, K. F. & Wilde, L. C. *Streptomyces albus* G mutants defective in the SalGI restriction-modification system. *J. Gen. Microbiol.* **116**, 323-334 (1980).
11. Yan, Y. et al. Non-enzymatic pyridine ring formation in the biosynthesis of the rubrolone tropolone alkaloids. *Nat. Commun.* **7**, 13083 (2016).
12. Gust, B., Challis, G. L., Fowler, K., Kieser, T. & Chater, K. F. PCR-targeted *Streptomyces* gene replacement identifies a protein domain needed for biosynthesis of the sesquiterpene soil odor geosmin. *Proc. Natl. Acad. Sci. USA* **100**, 1541-1546 (2003).
13. Kumar, S., Stecher, G. & Tamura, K. MEGA7: molecular evolutionary genetics analysis version 7.0 for bigger datasets. *Mol. Biol. Evol.* **33**,1870-1874 (2016).
14. Saitou, N. & Nei M. The neighbor-joining method: A new method for reconstructing phylogenetic trees. *Mol. Biol. Evol.* **4**, 406-425 (1987).
15. Felsenstein, J. Confidence limits on phylogenies: An approach using the bootstrap. *Evolution* **39**, 783-791 (1985).
16. Sievers, F. & Higgins, D. G. The clustal omega multiple alignment package. *Methods Mol. Biol.* **2231**, 3-16 (2021).

17. Gouet, P., Robert, X. & Courcelle, E. ESPript/ENDscript: extracting and rendering sequence and 3D information from atomic structures of proteins. *Nucleic Acids Res.* **31**, 3320-3323 (2003).
